# Supplementary material for: Single-carbon-atom transfer to para-quinone methides from TMSCF2Br
Source: Royal Society of Chemistry journal article supplement (doi:10.1039/d5sc03234b), 2025-01-01

## Supporting Information

### Single-Carbon-Atom Transfer to *para*-Quinone Methides from TMSCF<sub>2</sub>Br

Ruikang Sun,<sup>‡,a</sup> Zhang Pei,<sup>‡,a</sup> Yong Yan,<sup>a</sup> Jie Zhu,<sup>a</sup> Qirui Chen,<sup>a</sup> Chi Yang,<sup>b</sup> Aijun Lin,<sup>a</sup>

Xuanyi Li,<sup>a</sup> Shang Gao<sup>\*,a</sup> and Hequan Yao<sup>\*,a</sup>

<sup>a</sup>State Key Laboratory of Natural Medicines (SKLNM) and Department of Medicinal Chemistry, School of Pharmacy, China Pharmaceutical University, Nanjing 210009, P. R. China

<sup>b</sup>Anhui Provincial Joint Key Laboratory for Innovative Drug Research and Industry Integration, School of Chemistry and Materials Engineering, Fuyang Normal University, Fuyang 236037, P. R. China

\*E-mail: gaoshang1990@cpu.edu.cn; hyao@cpu.edu.cn.

#### Content

|     |                                                                                          |    |
|-----|------------------------------------------------------------------------------------------|----|
| 1.  | General Information .....                                                                | 2  |
| 2.  | General Procedure for the Synthesis of <i>p</i> -QMs Derivatives .....                   | 3  |
| 3.  | General Procedure A for the Synthesis of Monofluoroalkenes <b>5</b> .....                | 5  |
| 4.  | Intermolecular S <sub>N</sub> V Reaction with <b>5aa</b> .....                           | 11 |
| 5.  | One-pot Reaction for the Synthesis of tetra-Substituted Alkene <b>6b</b> .....           | 15 |
| 6.  | Optimization of Reaction Parameters for the Synthesis of <b>9aa</b> .....                | 16 |
| 7.  | General Procedure B for the Synthesis of Product <b>9</b> .....                          | 18 |
| 8.  | Gram-scale Reaction for the Synthesis of <b>9aa</b> .....                                | 26 |
| 9.  | One-pot Reaction for the Synthesis of <b>9aa</b> and <b>9ka</b> .....                    | 27 |
| 10. | Transformations of the Products .....                                                    | 29 |
| 11. | Control Experiments .....                                                                | 33 |
| 12. | Calculation Studies .....                                                                | 34 |
| 13. | Crystal Structure of Product <b>10</b> .....                                             | 40 |
| 14. | <sup>1</sup> H, <sup>13</sup> C and <sup>19</sup> F NMR Spectra of Title Compounds ..... | 41 |

## 1. General Information

**Reagents and Solvents:** PE refers to petroleum ether b. p. 60-90 °C, EA refers to ethyl acetate, and DCM refers to dichloromethane. All other starting materials and solvents were commercially available and were used without further purification unless otherwise stated.

**Chromatography:** Flash column chromatography was carried out using commercially available 200-300 mesh under pressure unless otherwise indicated. Gradient flash chromatography was conducted eluting with PE/EA or DCM/MeOH, they were listed as volume ratios.

**Data collection:**  $^1\text{H}$ ,  $^{13}\text{C}$  and  $^{19}\text{F}$  NMR spectra were collected on BRUKER AV-300 (300 MHz) spectrometer using  $\text{CDCl}_3$  or  $\text{DMSO}-d_6$  as solvent. Chemical shifts of  $^1\text{H}$  NMR were recorded in parts per million (ppm,  $\delta$ ) relative to tetramethylsilane ( $\delta = 0.00$  ppm) with the solvent resonance as an internal standard ( $\text{CDCl}_3$ :  $\delta = 7.26$  ppm,  $\text{DMSO}-d_6$ :  $\delta = 2.50$  ppm). Data are reported as follows: chemical shift in ppm ( $\delta$ ), multiplicity (s = singlet, d = doublet, t = triplet, q = quartet, brs = broad singlet, m = multiplet), coupling constant (Hz), and integration. Chemical shifts of  $^{13}\text{C}$  NMR were reported in ppm with the solvent as the internal standard ( $\text{CDCl}_3$ :  $\delta = 77.16$  ppm). High Resolution Mass measurement was performed on Agilent Q-TOF 65451 mass spectrometer with electron spray ionization (ESI) as the ion source. Melting point (m. p.) was measured on a microscopic melting point apparatus. X-ray diffraction analyses were carried out on a microcrystalline powder using a Rigaku Oxford Diffraction XtaLAB Synergy-S diffractometer using Mo radiation ( $\lambda = 0.71073$  Å).

## 2. General Procedure for the Synthesis of *p*-QMs Derivatives

The *p*-QMs Derivatives **2a** – **2q** were prepared according to the reported literature procedures.<sup>1</sup>

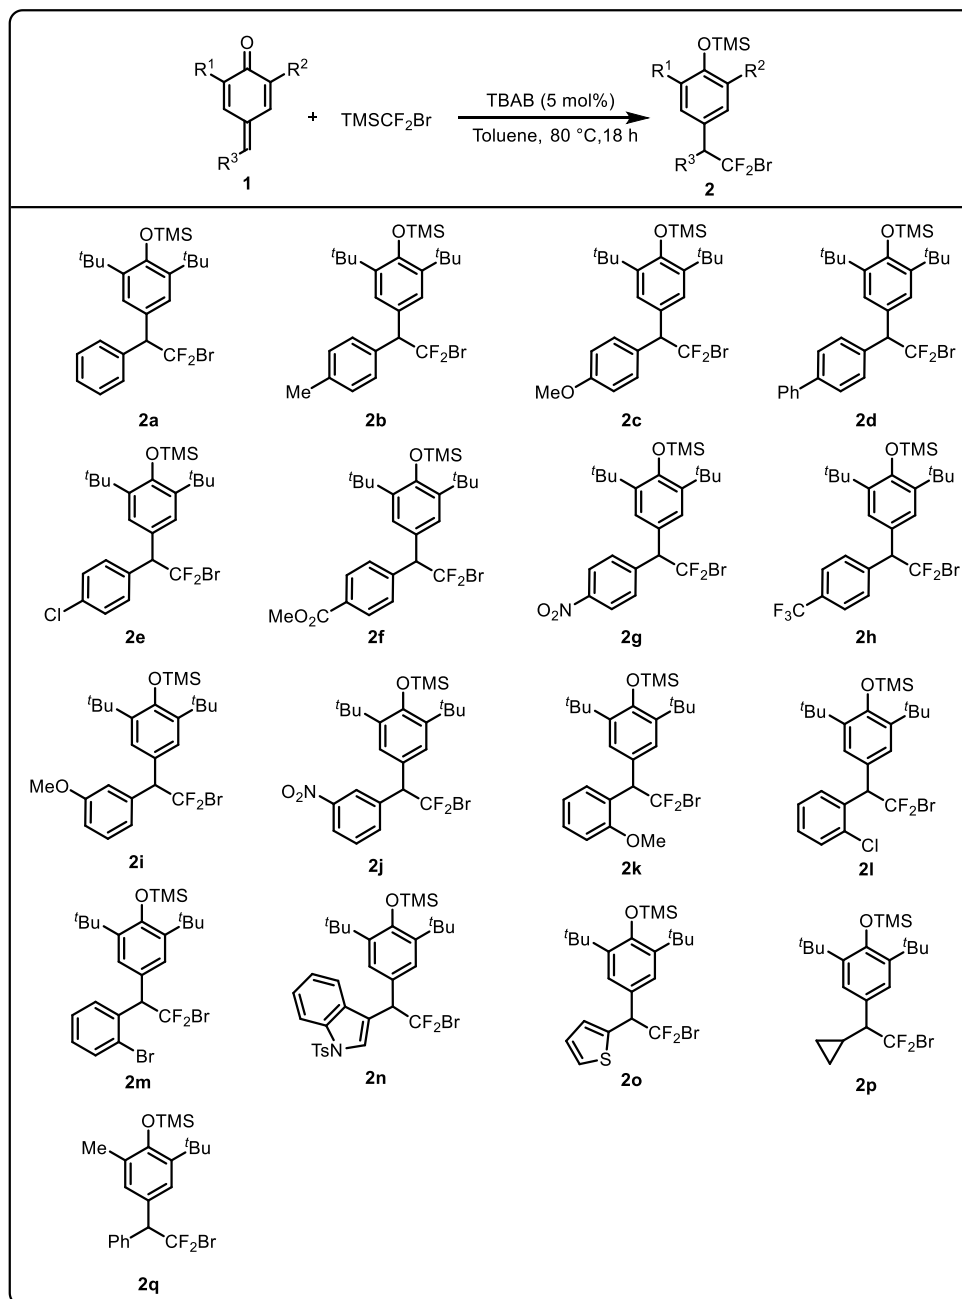

**Figure S1.** Synthesis of *p*-QMs Derivatives **2**

To an oven-dried 10 mL Schlenk tube equipped with a Teflon coated magnetic stir bar was added *p*-QMs (1.0 mmol, 1.0 equiv) and TBAB (16 mg, 0.05 mmol, 5 mol %). Then the Schlenk tube was evacuated and filled with argon for three times. After that, TMSCF<sub>2</sub>Br (406.2 mg, 2.0 mmol, 2.0 equiv) dissolved in toluene (2.0 mL) was added

[1] J. Zhu, M. Xu, B. Gong, A. Lin, S. Gao, *Org. Lett.* **2023**, 25, 3271.

under argon atmosphere via a syringe. The reaction mixture was stirred at 80 °C in oil bath for 18 h. After completed consumption of starting material, the resulting mixture was then poured into ice water (5 mL), extracted with EA (3 × 5 mL). The organic layers were combined and dried over anhydrous MgSO<sub>4</sub>. After removal of the solvent in vacuo, the crude material was purified by flash chromatography on silica gel (PE) to afford the desired product **2a** – **2q**.



### 3. General Procedure A for the Synthesis of Monofluoroalkenes 5

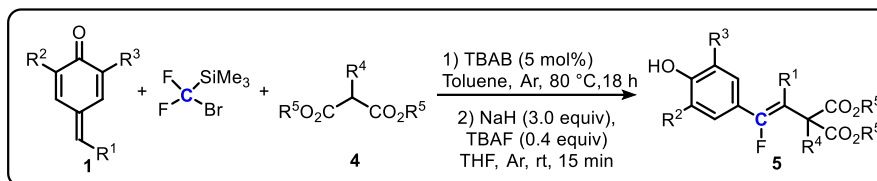

To an oven-dried 10-mL Schlenk tube equipped with a Teflon coated magnetic stir bar was added *p*-QMs **1** (0.5 mmol, 1.0 equiv) and TBAB (8.0 mg, 0.025 mmol, 5 mol %), then the Schlenk tube was evacuated and filled with argon for three times. After that, TMSBr (203.1 mg, 1.0 mmol, 2.0 equiv) dissolved in toluene (1.0 mL) was added under argon atmosphere via a syringe. The reaction mixture was stirred at 80 °C in oil bath for 18 h to afford the toluene solution of crude intermediate.

To another oven-dried 10-mL Schlenk tube equipped with a Teflon coated magnetic stir bar was added 60% NaH (60.0 mg, 1.5 mmol, 3.0 equiv), then the Schlenk tube was evacuated and filled with argon for three times. After that, anhydrous THF (0.5 mL) and **4** (1.0 mmol, 2.0 equiv, dissolved in 0.5 mL THF) was added under argon atmosphere via a syringe. After stirred for 30 min at room temperature, the toluene solution of crude intermediate was added, and then TBAF (0.2 mmol, 0.4 equiv, 1 M solution in THF) was dropped slowly under argon atmosphere stirred for 15 min at room temperature. When the starting material was completely consumed, saturated solution of NH<sub>4</sub>Cl (5 mL) was slowly added to quench the reaction. The reaction mixture was extracted with EA (3 × 10 mL). The organic layers were combined and dried over anhydrous MgSO<sub>4</sub>. After removal of the solvent in vacuo, the residue was purified by flash chromatography on silica gel (PE/EA) to afford the corresponding product **5**.

#### *diethyl (Z)-2-(2-(3,5-di-tert-butyl-4-hydroxyphenyl)-2-fluoro-1-phenylvinyl)-2-methylmalonate (5aa)*

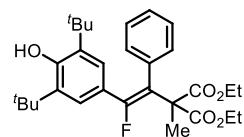

Prepared through general procedure A to give **5aa** in 187.0 mg, 75% yield, white solid, **m.p.** 120 – 122 °C, *R<sub>f</sub>* = 0.45 (PE/EA = 10/1). **<sup>1</sup>H NMR (300 MHz, CDCl<sub>3</sub>)** δ 7.32 – 7.19 (m, 5H), 6.94 (s, 2H), 5.27 (s, 1H), 4.12 (q, *J* = 7.2 Hz, 4H), 1.65 (s, 3H), 1.22 – 1.17 (m, 24H) ppm. **<sup>13</sup>C NMR (75 MHz, CDCl<sub>3</sub>)** δ 171.2, 156.4 (d, <sup>1</sup>*J* = 252.4 Hz), 154.2, 136.6 (d, <sup>3</sup>*J* = 8.4 Hz), 135.0, 130.8 (d, <sup>4</sup>*J* = 3.1 Hz), 128.6, 127.6, 125.3 (d, <sup>3</sup>*J* = 7.6 Hz), 123.0 (d, <sup>2</sup>*J* = 28.2 Hz), 117.8 (d, <sup>2</sup>*J* = 19.5 Hz), 61.6, 58.8, 34.3, 30.1, 22.0 (d, <sup>4</sup>*J* = 3.1 Hz), 14.0 ppm. **<sup>19</sup>F NMR (282 MHz, CDCl<sub>3</sub>)** δ – 96.19 ppm. **HRMS (ESI) *m/z*** Calcd for [C<sub>30</sub>H<sub>39</sub>FO<sub>5</sub> – H]<sup>–</sup> 497.2709, found 497.2701.

**diethyl (Z)-2-(2-(3,5-di-tert-butyl-4-hydroxyphenyl)-2-fluoro-1-(4-(methoxycarbonyl)phenyl)vinyl)-2-methylmalonate (5ba)**

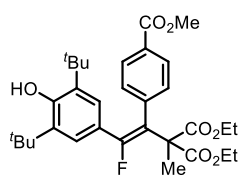

Prepared through general procedure A to give **5ba** in 167.0 mg, 60% yield, colorless oil,  $R_f$  = 0.2 (PE/EA = 10/1).  $^1\text{H}$  NMR (300 MHz,  $\text{CDCl}_3$ )  $\delta$  7.97 (d,  $J$  = 8.4 Hz, 2H), 7.30 (d,  $J$  = 8.3 Hz, 2H), 6.91 (s, 2H), 5.31 (s, 1H), 4.12 (q,  $J$  = 7.2 Hz, 4H), 3.91 (s, 3H), 1.67 (s, 3H), 1.22 – 1.18 (m, 24H) ppm.  $^{13}\text{C}$  NMR (75 MHz,  $\text{CDCl}_3$ )  $\delta$  170.5, 166.4, 156.5 (d,  $^1J$  = 254.5 Hz), 154.1, 141.5 (d,  $^3J$  = 8.5 Hz), 134.8, 130.6 (d,  $^4J$  = 3.0 Hz), 129.4, 128.8, 125.0 (d,  $^3J$  = 7.1 Hz), 122.2 (d,  $^2J$  = 28.2 Hz), 116.7 (d,  $^2J$  = 20.4 Hz), 61.4, 58.2, 51.9, 33.9, 29.6, 21.7 (d,  $^4J$  = 2.6 Hz), 13.6 ppm.  $^{19}\text{F}$  NMR (282 MHz,  $\text{CDCl}_3$ )  $\delta$  – 93.54 ppm. HRMS (ESI)  $m/z$  Calcd for  $[\text{C}_{32}\text{H}_{41}\text{FO}_7 - \text{H}]^-$  555.2764, found 555.2768.

**diethyl (Z)-2-(1-(4-chlorophenyl)-2-(3,5-di-tert-butyl-4-hydroxyphenyl)-2-fluorovinyl)-2-methylmalonate (5ca)**

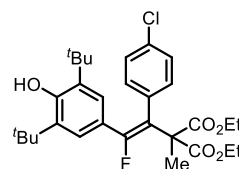

Prepared through general procedure A to give **5ca** in 177.9 mg, 67% yield, yellow solid, **m.p.** 78 – 80 °C,  $R_f$  = 0.35 (PE/EA = 10/1).  $^1\text{H}$  NMR (300 MHz,  $\text{CDCl}_3$ )  $\delta$  7.44 (d,  $J$  = 8.5 Hz, 2H), 7.32 (d,  $J$  = 8.4 Hz, 2H), 7.08 (s, 2H), 5.50 (s, 1H), 4.30 (q,  $J$  = 7.1 Hz, 4H), 1.83 (s, 3H), 1.41 (s, 18H), 1.37 (t,  $J$  = 7.1 Hz, 6H) ppm.  $^{13}\text{C}$  NMR (75 MHz,  $\text{CDCl}_3$ )  $\delta$  171.0, 156.8 (d,  $^1J$  = 252.4 Hz), 154.4, 135.3, 135.2, 133.7, 132.3 (d,  $^4J$  = 3.4 Hz), 128.8, 125.3 (d,  $^3J$  = 7.3 Hz), 122.7 (d,  $^2J$  = 28.0 Hz), 116.7 (d,  $^2J$  = 20.0 Hz), 61.7, 58.6, 34.3, 30.0, 22.0 (d,  $^4J$  = 3.3 Hz), 14.0 ppm.  $^{19}\text{F}$  NMR (282 MHz,  $\text{CDCl}_3$ )  $\delta$  – 94.43 ppm. HRMS (ESI)  $m/z$  Calcd for  $[\text{C}_{30}\text{H}_{38}\text{ClFO}_5 - \text{H}]^-$  531.2319, found 531.2310.

**diethyl (Z)-2-(1-([1,1'-biphenyl]-4-yl)-2-(3,5-di-tert-butyl-4-hydroxyphenyl)-2-fluorovinyl)-2-methylmalonate (5da)**

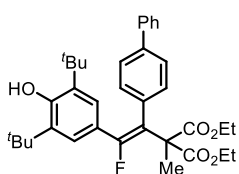

Prepared through general procedure A to give **5da** in 163.8 mg, 57% yield, white solid, **m.p.** 96 – 98 °C,  $R_f$  = 0.4 (PE/EA = 10/1).  $^1\text{H}$  NMR (300 MHz,  $\text{CDCl}_3$ )  $\delta$  7.18 – 7.14 (m, 4H), 7.09 – 7.04 (m, 2H), 7.00 – 6.91 (m, 3H), 6.62 (s, 2H), 4.92 (s, 1H), 3.78 (q,  $J$  = 7.1 Hz, 4H), 1.35 (s, 3H), 0.90 – 0.81 (m, 24H) ppm.  $^{13}\text{C}$  NMR (75 MHz,  $\text{CDCl}_3$ )  $\delta$  171.2, 156.4 (d,  $^1J$  = 251.3 Hz), 154.2, 141.0, 140.7, 135.7 (d,  $^3J$  = 8.4 Hz), 135.1, 131.2 (d,  $^4J$  = 2.9 Hz), 128.9, 127.4, 127.1, 125.2 (d,  $^3J$  = 7.8 Hz), 123.0 (d,  $^2J$  = 28.1 Hz), 117.4 (d,  $^2J$  = 19.5 Hz), 61.7, 58.8, 34.3, 30.0, 22.1 (d,  $^4J$  = 3.0 Hz), 14.0 ppm.  $^{19}\text{F}$  NMR (282 MHz,  $\text{CDCl}_3$ )  $\delta$  – 96.35 ppm. HRMS (ESI)  $m/z$  Calcd for  $[\text{C}_{36}\text{H}_{43}\text{FO}_5 - \text{H}]^-$  573.3022, found 573.3029.

**diethyl (Z)-2-(1-(3-chlorophenyl)-2-(3,5-di-tert-butyl-4-hydroxyphenyl)-2-fluorovinyl)-2-methylmalonate (5ea)**

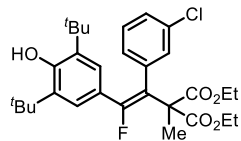

Prepared through general procedure A to give **5ea** in 207.9 mg, 78% yield, white solid, **m.p.** 101 – 103 °C,  $R_f$  = 0.45 (PE/EA = 10/1).

**$^1\text{H}$  NMR (300 MHz,  $\text{CDCl}_3$ )**  $\delta$  7.26 – 7.21 (m, 3H), 7.14 – 7.08 (m, 1H), 6.95 (s, 2H), 5.34 (s, 1H), 4.14 (q,  $J$  = 7.1 Hz, 4H), 1.67 (s, 3H), 1.29 – 1.19 (m, 24H) ppm.  **$^{13}\text{C}$  NMR (75 MHz,  $\text{CDCl}_3$ )**  $\delta$  170.9, 156.9 (d,  $^1J$  = 252.4 Hz), 154.5, 138.6 (d,  $^3J$  = 8.7 Hz), 135.2, 134.4, 130.9 (d,  $^4J$  = 3.3 Hz), 130.0, 129.0 (d,  $^4J$  = 3.1 Hz), 127.8, 125.3 (d,  $^3J$  = 7.6 Hz), 122.5 (d,  $^2J$  = 27.9 Hz), 116.6 (d,  $^2J$  = 20.3 Hz), 61.8, 58.7, 34.3, 30.0, 22.0 (d,  $^4J$  = 3.1 Hz), 14.0 ppm.  **$^{19}\text{F}$  NMR (282 MHz,  $\text{CDCl}_3$ )**  $\delta$  – 94.52 ppm. **HRMS (ESI)**  $m/z$  Calcd for  $[\text{C}_{30}\text{H}_{38}\text{ClFO}_5 - \text{H}]^-$  531.2319, found 531.2311.

**diethyl (Z)-2-(2-(3,5-di-tert-butyl-4-hydroxyphenyl)-2-fluoro-1-(3-nitrophenyl)vinyl)-2-methylmalonate (5fa)**

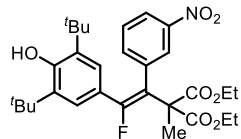

Prepared through general procedure A to give **5fa** in 171.6 mg, 63% yield, white solid, **m.p.** 108 – 110 °C,  $R_f$  = 0.3 (PE/EA = 10/1).

**$^1\text{H}$  NMR (300 MHz,  $\text{CDCl}_3$ )**  $\delta$  8.15 – 8.10 (m, 2H), 7.60 – 7.56 (m, 1H), 7.49 (t,  $J$  = 7.8 Hz, 1H), 6.89 (s, 2H), 5.36 (s, 1H), 4.15 (q,  $J$  = 7.2 Hz, 4H), 1.72 (s, 3H), 1.26 – 1.18 (s, 24H) ppm.  **$^{13}\text{C}$  NMR (75 MHz,  $\text{CDCl}_3$ )**  $\delta$  170.7, 158.0 (d,  $^1J$  = 255.3 Hz), 154.7, 148.3, 138.9 (d,  $^3J$  = 9.0 Hz), 137.3 (d,  $^4J$  = 3.0 Hz), 135.5, 129.5, 126.0 (d,  $^4J$  = 3.3 Hz), 125.6 (d,  $^3J$  = 6.6 Hz), 122.5, 122.2 (d,  $^2J$  = 27.8 Hz), 116.1 (d,  $^2J$  = 21.2 Hz), 62.0, 58.6, 34.3, 30.0, 22.2 (d,  $^4J$  = 3.6 Hz), 14.0 ppm.  **$^{19}\text{F}$  NMR (282 MHz,  $\text{CDCl}_3$ )**  $\delta$  – 90.92 ppm. **HRMS (ESI)**  $m/z$  Calcd for  $[\text{C}_{30}\text{H}_{38}\text{FNO}_7 - \text{H}]^-$  542.2560, found 542.2572.

**diethyl (Z)-2-(2-(3,5-di-tert-butyl-4-hydroxyphenyl)-2-fluoro-1-(m-tolyl)vinyl)-2-methylmalonate (5ga)**

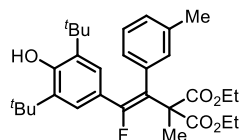

Prepared through general procedure A to give **5ga** in 130.3 mg, 51% yield, yellow solid, **m.p.** 110 – 112 °C,  $R_f$  = 0.4 (PE/EA = 10/1).

**$^1\text{H}$  NMR (300 MHz,  $\text{CDCl}_3$ )**  $\delta$  7.26 – 7.15 (m, 1H), 7.07 – 6.96 (m, 5H), 5.28 (s, 1H), 4.13 (q,  $J$  = 7.1 Hz, 4H), 2.29 (s, 3H), 1.63 (s, 3H), 1.28 – 1.18 (m, 24H) ppm.  **$^{13}\text{C}$  NMR (75 MHz,  $\text{CDCl}_3$ )**  $\delta$  171.3, 156.1 (d,  $^1J$  = 250.4 Hz), 154.1, 138.1, 136.3 (d,  $^3J$  = 8.3 Hz), 134.9, 131.3 (d,  $^4J$  = 3.0 Hz), 128.6, 128.4, 127.7 (d,  $^4J$  = 3.0 Hz), 125.1 (d,  $^3J$  = 7.9 Hz), 123.0 (d,  $^2J$  = 28.3 Hz), 117.7 (d,  $^2J$  = 19.2 Hz), 61.6, 58.7, 34.2, 30.0, 22.0 (d,  $^4J$  = 2.8 Hz), 21.3, 14.0 ppm.  **$^{19}\text{F}$  NMR (282 MHz,  $\text{CDCl}_3$ )**  $\delta$  – 97.08 ppm. **HRMS (ESI)**  $m/z$  Calcd for  $[\text{C}_{31}\text{H}_{41}\text{FO}_5 - \text{H}]^-$  511.2865, found 511.2867.

**diethyl (Z)-2-(2-(3,5-di-tert-butyl-4-hydroxyphenyl)-2-fluoro-1-(3-methoxyphenyl)vinyl)-2-methylmalonate (5ha)**

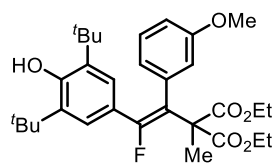

Prepared through general procedure A to give **5ha** in 148.6 mg, 56% yield, white solid, **m.p.** 88 – 90 °C,  $R_f$  = 0.4 (PE/EA = 10/1). **<sup>1</sup>H NMR (300 MHz, CDCl<sub>3</sub>)**  $\delta$  7.21 (t,  $J$  = 7.9 Hz, 1H), 6.99 (s, 2H), 6.82 – 6.74 (m, 3H), 5.30 (s, 1H), 4.15 (q,  $J$  = 7.1 Hz, 4H), 3.71 (s, 3H), 1.64 (s, 3H), 1.24 – 1.19 (m, 24H) ppm. **<sup>13</sup>C NMR (75 MHz, CDCl<sub>3</sub>)**  $\delta$  171.2, 159.8, 156.3 (d,  $^1J$  = 251.0 Hz), 154.2, 137.8 (d,  $^3J$  = 8.4 Hz), 135.0, 129.6, 125.1 (d,  $^3J$  = 7.5 Hz), 123.1 (d,  $^4J$  = 3.0 Hz), 123.0 (d,  $^2J$  = 28.1 Hz), 117.5 (d,  $^2J$  = 19.5 Hz), 116.3 (d,  $^4J$  = 3.1 Hz), 113.4, 61.6, 58.6, 55.3, 34.2, 30.0, 22.0 (d,  $^4J$  = 2.7 Hz), 13.9 ppm. **<sup>19</sup>F NMR (282 MHz, CDCl<sub>3</sub>)**  $\delta$  – 96.35 ppm. **HRMS (ESI)**  $m/z$  Calcd for [C<sub>31</sub>H<sub>41</sub>FO<sub>6</sub> – H]<sup>–</sup> 527.2814, found 527.2819.

**diethyl (E)-2-(1-(2-chlorophenyl)-2-(3,5-di-tert-butyl-4-hydroxyphenyl)-2-fluorovinyl)-2-methylmalonate (5ia)**

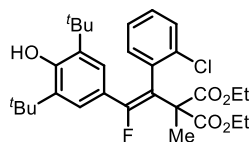

Prepared through general procedure A to give **5ia** in 151.9 mg, 57% yield, white solid, **m.p.** 96 – 98 °C,  $R_f$  = 0.35 (PE/EA = 10/1). **<sup>1</sup>H NMR (300 MHz, CDCl<sub>3</sub>)**  $\delta$  7.38 – 7.35 (m, 1H), 7.28 – 7.17 (m, 3H), 6.99 (s, 2H), 5.29 (s, 1H), 4.26 (q,  $J$  = 7.0 Hz, 2H), 4.05 – 3.97 (m, 2H), 1.66 (s, 3H), 1.30 (t,  $J$  = 7.1 Hz, 3H), 1.25 (s, 18H), 1.15 (t,  $J$  = 7.1 Hz, 3H) ppm. **<sup>13</sup>C NMR (75 MHz, CDCl<sub>3</sub>)**  $\delta$  171.2, 157.6 (d,  $^1J$  = 255.0 Hz), 154.5, 136.1 (d,  $^4J$  = 2.9 Hz), 136.0 (d,  $^3J$  = 9.2 Hz), 135.2, 132.8 (d,  $^4J$  = 3.1 Hz), 129.7, 129.2, 127.0, 124.7 (d,  $^3J$  = 7.3 Hz), 122.9 (d,  $^2J$  = 28.3 Hz), 114.8 (d,  $^2J$  = 22.2 Hz), 61.7 (d,  $^4J$  = 4.5 Hz), 58.6, 34.3, 30.1, 21.5, 14.1, 13.9 ppm. **<sup>19</sup>F NMR (282 MHz, CDCl<sub>3</sub>)**  $\delta$  – 93.06 ppm. **HRMS (ESI)**  $m/z$  Calcd for [C<sub>30</sub>H<sub>38</sub>ClFO<sub>5</sub> – H]<sup>–</sup> 531.2319, found 531.2312.

**diethyl (Z)-2-(1-(benzo[d][1,3]dioxol-5-yl)-2-(3,5-di-tert-butyl-4-hydroxyphenyl)-2-fluorovinyl)-2-methylmalonate (5ja)**

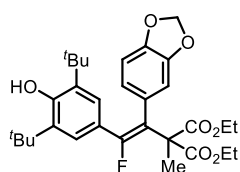

Prepared through general procedure A to give **5ja** in 188.6 mg, 69% yield, colorless oil,  $R_f$  = 0.25 (PE/EA = 10/1). **<sup>1</sup>H NMR (300 MHz, CDCl<sub>3</sub>)**  $\delta$  7.02 (s, 2H), 6.78 (d,  $J$  = 8.3 Hz, 1H), 6.72 – 6.70 (m, 2H), 5.93 (s, 2H), 5.34 (s, 1H), 4.18 (q,  $J$  = 7.1 Hz, 4H), 1.66 (s, 3H), 1.30 – 1.23 (m, 24H) ppm. **<sup>13</sup>C NMR (75 MHz, CDCl<sub>3</sub>)**  $\delta$  171.2, 156.5 (d,  $^1J$  = 251.1 Hz), 154.2, 147.7, 147.1, 135.0, 130.0 (d,  $^3J$  = 8.9 Hz), 125.1 (d,  $^3J$  = 7.9 Hz), 124.3 (d,  $^4J$  = 3.3 Hz), 123.0 (d,  $^2J$  = 28.1 Hz), 117.1 (d,  $^2J$  = 20.2 Hz), 111.4 (d,  $^4J$  = 3.4 Hz), 108.6, 101.0, 61.6, 58.7, 34.3, 30.1, 22.0 (d,  $^4J$  = 2.9 Hz), 14.0 ppm. **<sup>19</sup>F NMR (282 MHz, CDCl<sub>3</sub>)**  $\delta$  – 96.04 ppm. **HRMS (ESI)**  $m/z$  Calcd for [C<sub>31</sub>H<sub>39</sub>FO<sub>7</sub> – H]<sup>–</sup> 541.2607, found 541.2615.

**diethyl (Z)-2-(2-(3,5-di-tert-butyl-4-hydroxyphenyl)-2-fluoro-1-(2,3,4-trimethoxyphenyl)vinyl)-2-methylmalonate (5ka)**

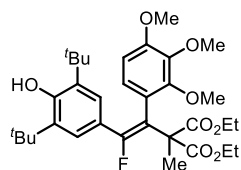

Prepared through general procedure A to give **5ka** in 209.1 mg, 71% yield, colorless oil,  $R_f = 0.2$  (PE/EA = 5/1).  **$^1\text{H}$  NMR (300 MHz,  $\text{CDCl}_3$ )**  $\delta$  7.03 (s, 2H), 6.42 (s, 2H), 5.31 (s, 1H), 4.16 (q,  $J = 7.1$  Hz, 4H), 3.82 (s, 3H), 3.74 (s, 6H), 1.67 (s, 3H), 1.27 (s, 18H), 1.22 (t,  $J = 7.2$  Hz, 6H) ppm.  **$^{13}\text{C}$  NMR (75 MHz,  $\text{CDCl}_3$ )**  $\delta$  171.1, 156.4 (d,  $^1J = 251.7$  Hz), 154.2, 153.4, 137.5, 135.1, 132.1 (d,  $^3J = 8.8$  Hz), 125.0 (d,  $^3J = 7.6$  Hz), 123.0 (d,  $^2J = 28.2$  Hz), 117.6 (d,  $^2J = 20.0$  Hz), 107.9 (d,  $^4J = 3.2$  Hz), 61.6, 60.8, 58.8, 56.2, 34.3, 30.1, 22.0 (d,  $^4J = 3.0$  Hz), 14.0 ppm.  **$^{19}\text{F}$  NMR (282 MHz,  $\text{CDCl}_3$ )**  $\delta$  -96.50 ppm. **HRMS (ESI)**  $m/z$  Calcd for  $[\text{C}_{33}\text{H}_{45}\text{FO}_8 - \text{H}]^-$  587.3026, found 587.3019.

**diethyl (Z)-2-(2-fluoro-2-(4-hydroxy-3,5-diisopropylphenyl)-1-phenylvinyl)-2-methylmalonate (5la)**

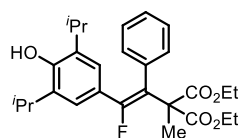

Prepared through general procedure A to give **5la** in 180.0 mg, 76% yield, colorless oil,  $R_f = 0.35$  (PE/EA = 10/1).  **$^1\text{H}$  NMR (300 MHz,  $\text{CDCl}_3$ )**  $\delta$  7.29 – 7.19 (m, 5H), 6.78 (s, 2H), 5.08 (s, 1H), 4.12 (q,  $J = 7.1$  Hz, 4H), 3.05 – 2.91 (m, 2H), 1.66 (s, 3H), 1.19 (t,  $J = 7.1$  Hz, 6H), 1.00 (d,  $J = 6.9$  Hz, 12H) ppm.  **$^{13}\text{C}$  NMR (75 MHz,  $\text{CDCl}_3$ )**  $\delta$  171.3, 156.3 (d,  $^1J = 251.3$  Hz), 150.4, 136.6 (d,  $^3J = 8.5$  Hz), 132.9, 130.9 (d,  $^4J = 3.2$  Hz), 128.6, 127.7, 124.1 (d,  $^2J = 28.7$  Hz), 123.7 (d,  $^3J = 7.3$  Hz), 117.9 (d,  $^2J = 19.1$  Hz), 61.7, 58.8, 26.9, 22.5, 22.0 (d,  $^4J = 2.4$  Hz), 14.0 ppm.  **$^{19}\text{F}$  NMR (282 MHz,  $\text{CDCl}_3$ )**  $\delta$  -96.24 ppm. **HRMS (ESI)**  $m/z$  Calcd for  $[\text{C}_{28}\text{H}_{35}\text{FO}_5 - \text{H}]^-$  469.2396, found 469.2389.

**diethyl (Z)-2-(2-(3-(tert-butyl)-4-hydroxy-5-methylphenyl)-2-fluoro-1-phenylvinyl)-2-methylmalonate (5ma)**

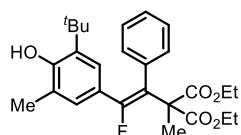

Prepared through general procedure A to give **5ma** in 182.0 mg, 80% yield, colorless oil,  $R_f = 0.25$  (PE/EA = 10/1).  **$^1\text{H}$  NMR (300 MHz,  $\text{CDCl}_3$ )**  $\delta$  7.30 – 7.14 (m, 5H), 6.90 (s, 1H), 6.71 (s, 1H), 5.27 (s, 1H), 4.11 (q,  $J = 7.1$  Hz, 4H), 2.09 (s, 3H), 1.65 (s, 3H), 1.18 (t,  $J = 7.1$  Hz, 6H), 1.10 (s, 9H) ppm.  **$^{13}\text{C}$  NMR (75 MHz,  $\text{CDCl}_3$ )**  $\delta$  171.3, 156.2 (d,  $^1J = 251.2$  Hz), 153.2, 136.4 (d,  $^3J = 8.2$  Hz), 134.7, 130.7 (d,  $^4J = 3.0$  Hz), 128.5, 127.8 (d,  $^3J = 7.3$  Hz), 127.6, 126.1 (d,  $^3J = 7.0$  Hz), 123.3 (d,  $^2J = 28.7$  Hz), 122.6, 117.8 (d,  $^2J = 19.1$  Hz), 61.7, 58.7, 34.4, 29.3, 21.9 (d,  $^4J = 3.0$  Hz), 16.0, 13.9 ppm.  **$^{19}\text{F}$  NMR (282 MHz,  $\text{CDCl}_3$ )**  $\delta$  -95.38 ppm. **HRMS (ESI)**  $m/z$  Calcd for  $[\text{C}_{27}\text{H}_{33}\text{FO}_5 - \text{H}]^-$  455.2239, found 455.2227.

**diethyl (Z)-2-(2-(3,5-di-tert-butyl-4-hydroxyphenyl)-2-fluoro-1-phenylvinyl)-2-phenylmalonate (5ab)**

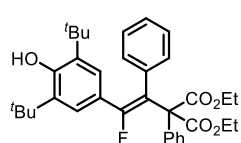

Prepared through general procedure A to give **5ab** in 145.8 mg, 52% yield, yellow solid, **m.p.** 132 – 134 °C,  $R_f = 0.4$  (PE/EA = 10/1).  **$^1\text{H}$  NMR (300 MHz,  $\text{CDCl}_3$ )**  $\delta$  7.63 – 7.59 (m, 2H), 7.37 – 7.22 (m, 8H), 7.00 (s, 2H), 5.32 (s, 1H), 4.10 – 3.94 (m, 4H), 1.23 (s,

18H), 1.06 (t,  $J = 7.1$  Hz, 6H) ppm.  $^{13}\text{C}$  NMR (75 MHz,  $\text{CDCl}_3$ )  $\delta$  169.8, 156.5 (d,  $^1J = 251.2$  Hz), 154.4, 137.1 (d,  $^3J = 7.9$  Hz), 136.5, 135.1, 130.9 (d,  $^4J = 3.0$  Hz), 129.3, 128.6, 127.7, 127.6, 127.4, 125.3 (d,  $^3J = 7.9$  Hz), 122.7 (d,  $^2J = 27.7$  Hz), 116.1 (d,  $^2J = 19.7$  Hz), 62.0, 34.3, 30.0, 13.8 ppm.  $^{19}\text{F}$  NMR (282 MHz,  $\text{CDCl}_3$ )  $\delta$  -90.19 ppm. HRMS (ESI)  $m/z$  Calcd for  $[\text{C}_{35}\text{H}_{41}\text{FO}_5 - \text{H}]^-$  559.2865, found 559.2870.

**diethyl (Z)-2-allyl-2-(2-(3,5-di-tert-butyl-4-hydroxyphenyl)-2-fluoro-1-phenylvinyl) malonate (5ac)**

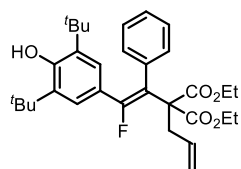

Prepared through general procedure A to give **5ac** in 134.0 mg, 52% yield, white solid, **m.p.** 114 – 116 °C,  $R_f = 0.45$  (PE/EA = 10/1).

$^1\text{H}$  NMR (300 MHz,  $\text{CDCl}_3$ )  $\delta$  7.22 – 7.11 (m, 5H), 6.84 (s, 2H), 6.05 – 5.91 (m, 1H), 5.20 (s, 1H), 5.03 – 4.95 (m, 2H), 4.02 (q,  $J = 7.1$  Hz, 4H), 2.71 (d,  $J = 7.2$  Hz, 2H), 1.14 – 1.07 (m, 24H) ppm.

$^{13}\text{C}$  NMR (75 MHz,  $\text{CDCl}_3$ )  $\delta$  170.2, 156.5 (d,  $^1J = 252.0$  Hz), 154.2, 136.7 (d,  $^3J = 8.3$  Hz), 135.0, 134.6, 130.9 (d,  $^4J = 2.9$  Hz), 128.5, 127.5, 125.3 (d,  $^3J = 7.3$  Hz), 123.0 (d,  $^2J = 28.2$  Hz), 118.2, 116.4 (d,  $^2J = 19.3$  Hz), 62.5, 61.4, 39.9 (d,  $^4J = 2.8$  Hz), 34.2, 30.0, 13.9 ppm.  $^{19}\text{F}$  NMR (282 MHz,  $\text{CDCl}_3$ )  $\delta$  -94.24 ppm. HRMS (ESI)  $m/z$  Calcd for  $[\text{C}_{32}\text{H}_{41}\text{FO}_5 - \text{H}]^-$  523.2865, found 523.2858.

**dimethyl (Z)-2-(2-(3,5-di-tert-butyl-4-hydroxyphenyl)-2-fluoro-1-phenylvinyl)-2-methylmalonate (5ad)**

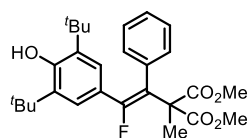

Prepared through general procedure A to give **5ad** in 164.7 mg, 70% yield, white solid, **m.p.** 140 – 142 °C,  $R_f = 0.45$  (PE/EA = 10/1).

$^1\text{H}$  NMR (300 MHz,  $\text{CDCl}_3$ )  $\delta$  7.26 – 7.16 (m, 3H), 7.13 – 7.10 (m, 2H), 6.88 (s, 2H), 5.22 (s, 1H), 3.58 (s, 6H), 1.54 (s, 3H),

1.13 (s, 18H) ppm.  $^{13}\text{C}$  NMR (75 MHz,  $\text{CDCl}_3$ )  $\delta$  171.7 (d,  $^4J = 1.0$  Hz), 156.4 (d,  $^1J = 250.3$  Hz), 154.3, 136.3 (d,  $^3J = 8.4$  Hz), 135.0 (d,  $^4J = 1.2$  Hz), 130.7 (d,  $^4J = 3.0$  Hz), 128.7, 127.8, 125.2 (d,  $^3J = 8.0$  Hz), 122.7 (d,  $^2J = 28.2$  Hz), 117.3 (d,  $^2J = 19.3$  Hz), 58.6 (d,  $^3J = 1.1$  Hz), 52.8, 34.3, 30.0, 22.1 (d,  $^4J = 2.6$  Hz) ppm.  $^{19}\text{F}$  NMR (282 MHz,  $\text{CDCl}_3$ )  $\delta$  -97.51 ppm. HRMS (ESI)  $m/z$  Calcd for  $[\text{C}_{28}\text{H}_{35}\text{FO}_5 - \text{H}]^-$  469.2396, found 469.2388.

**methyl (Z)-2-acetyl-4-(3,5-di-tert-butyl-4-hydroxyphenyl)-4-fluoro-2-methyl-3-phenylbut-3-enoate (8aa)**

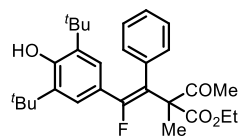

Prepared through general procedure A to give **8aa** in 110.1 mg, 47% yield, yellow solid, **m.p.** 120 – 122 °C,  $R_f = 0.45$  (PE/EA = 10/1).

$^1\text{H}$  NMR (300 MHz,  $\text{CDCl}_3$ )  $\delta$  7.34 – 7.26 (m, 3H), 7.18 – 7.16 (m, 2H), 6.95 (s, 2H), 5.33 (s, 1H), 4.09 – 3.98 (m, 2H), 2.48 (s,

3H), 1.48 (s, 3H), 1.23 (s, 18H), 1.14 (t,  $J = 7.1$  Hz, 3H) ppm.  $^{13}\text{C}$  NMR (75 MHz,  $\text{CDCl}_3$ )  $\delta$  205.0, 171.5, 156.4 (d,  $^1J = 249.7$  Hz), 154.5, 136.3 (d,  $^3J = 8.9$  Hz), 135.2, 130.5 (d,  $^4J = 2.0$  Hz), 128.9, 127.9, 125.2 (d,  $^3J = 7.8$  Hz), 122.5 (d,  $^2J = 27.9$  Hz), 118.1 (d,  $^2J = 20.0$  Hz), 64.0, 61.5, 34.3, 30.1, 27.2 (d,  $^4J = 4.7$  Hz), 20.9, 13.9 ppm.  $^{19}\text{F}$  NMR (282 MHz,  $\text{CDCl}_3$ )  $\delta$  -96.01 ppm. HRMS (ESI)  $m/z$  Calcd for  $[\text{C}_{29}\text{H}_{37}\text{FO}_4 + \text{H}]^+$  469.2749, found 469.2760.

#### 4. Intermolecular S<sub>N</sub>V Reaction with 5aa

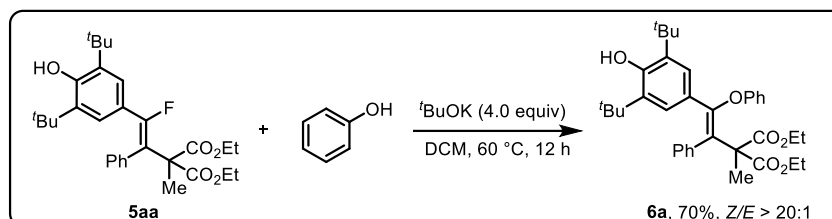

**diethyl (Z)-2-(2-(3,5-di-tert-butyl-4-hydroxyphenyl)-2-phenoxy-1-phenylvinyl)-2-methylmalonate (6a)** To an oven-dried 10 mL Schlenk tube equipped with a Teflon coated magnetic stir bar was added <sup>t</sup>BuOK (89.8 mg, 0.8 mmol, 4.0 equiv), **5aa** (99.7 mg, 0.2 mmol, 1.0 equiv) and phenol (37.6 mg, 0.4 mmol, 2.0 equiv) then the Schlenk tube was evacuated and filled with argon for three times. After that, anhydrous DCM (2 mL) was added under argon atmosphere via a syringe under argon atmosphere stirred for 12 h at 60 °C. After the starting material was completely consumed, ice water (5 mL) was slowly added to quench the reaction. The reaction mixture was extracted with DCM (3 × 10 mL). The organic layers were combined and dried over anhydrous MgSO<sub>4</sub>. After removal of the solvent in vacuo, the residue was purified by flash chromatography on silica gel (PE/EA) to afford the corresponding product **6a** as a white solid (80.1 mg, 70%, Z/E > 20:1). **m.p.** 134 – 135 °C, *R*<sub>f</sub> = 0.3 (PE/EA = 20/1). **<sup>1</sup>H NMR (300 MHz, CDCl<sub>3</sub>)** δ 7.22 – 7.08 (m, 7H), 6.86 – 6.78 (m, 5H), 5.01 (s, 1H), 4.10 – 3.90 (m, 4H), 1.61 (s, 3H), 1.13 – 1.09 (m, 24H) ppm. **<sup>13</sup>C NMR (75 MHz, CDCl<sub>3</sub>)** δ 171.7, 156.2, 153.0, 150.0, 138.6, 134.6, 131.2, 128.8, 128.1, 127.3, 126.8, 125.1, 125.0, 121.7, 118.2, 61.4, 59.0, 34.1, 30.2, 22.4, 14.0 ppm. **HRMS (ESI)** *m/z* Calcd for [C<sub>36</sub>H<sub>44</sub>O<sub>6</sub> + H]<sup>+</sup> 573.3211, found 573.3224.

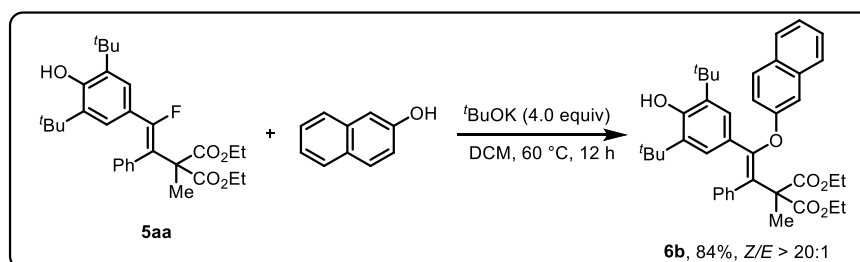

**diethyl (Z)-2-(2-(3,5-di-tert-butyl-4-hydroxyphenyl)-2-(naphthalen-2-yloxy)-1-phenylvinyl)-2-methylmalonate (6b)** To an oven-dried 10 mL Schlenk tube equipped with a Teflon coated magnetic stir bar was added <sup>t</sup>BuOK (89.8 mg, 0.8 mmol, 4.0 equiv), **5aa** (99.7 mg, 0.2 mmol, 1.0 equiv) and 2-hydroxynaphthalene (57.6 mg, 0.4 mmol, 2.0 equiv) then the Schlenk tube was evacuated and filled with argon for three times. After that, anhydrous DCM (2 mL) was added under argon atmosphere via a syringe under argon atmosphere stirred for 12 h at 60 °C. After the starting material was completely consumed, ice water (5 mL) was slowly added to quench the reaction. The reaction mixture was extracted with DCM (3 × 10 mL). The organic layers were combined and dried over anhydrous MgSO<sub>4</sub>. After removal of the solvent in vacuo, the residue was purified by flash chromatography on silica gel (PE/EA) to afford the corresponding

product **6b** as a white solid (104.4 mg, 84% yield, *Z/E* > 20:1). **m.p.** 116 – 118 °C, *R*<sub>f</sub> = 0.3 (PE/EA = 20/1). The regioselectivity of this reaction (C1 vs OH) was determined by the proton NMR with “Heavy Water Exchange NMR Experiment”. **<sup>1</sup>H NMR (300 MHz, CDCl<sub>3</sub>)** δ 7.70 – 7.57 (m, 3H), 7.38 – 7.14 (m, 9H), 6.86 (s, 2H), 4.99 (s, 1H), 4.07 – 3.90 (m, 3H), 1.12 – 1.07 (m, 24H) ppm. **<sup>13</sup>C NMR (75 MHz, CDCl<sub>3</sub>)** δ 171.7, 154.0, 153.1, 150.2, 138.5, 134.6, 134.1, 131.2, 129.5, 128.85, 128.1, 127.7, 127.2, 127.0, 126.9, 126.1, 125.5, 125.1, 124.0, 119.6, 113.8, 61.5, 59.0, 34.1, 30.2, 22.5, 14.0 ppm. **HRMS (ESI)** *m/z* Calcd for [C<sub>40</sub>H<sub>46</sub>O<sub>6</sub> + Na]<sup>+</sup> 645.3187, found 645.3204.

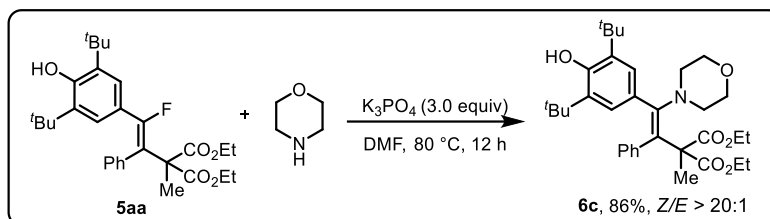

**diethyl (Z)-2-(2-(3,5-di-tert-butyl-4-hydroxyphenyl)-2-morpholino-1-phenylvinyl)-2-methylmalonate (6c)** To an oven-dried 10 mL Schlenk tube equipped with a Teflon coated magnetic stir bar was added K<sub>3</sub>PO<sub>4</sub> (127.4 mg, 0.6 mmol, 3.0 equiv), **5aa** (99.7 mg, 0.2 mmol, 1.0 equiv) and morpholine (34.8 mg, 0.4 mmol, 2.0 equiv) then the Schlenk tube was evacuated and filled with argon for three times. After that, anhydrous DMF (2 mL) was added under argon atmosphere via a syringe under argon atmosphere stirred for 12 h at 80 °C. After the starting material was completely consumed, ice water (5 mL) was slowly added to quench the reaction. The reaction mixture was extracted with EA (3 × 10 mL). The organic layers were combined and dried over anhydrous MgSO<sub>4</sub>. After removal of the solvent in vacuo, the residue was purified by flash chromatography on silica gel (PE/EA) to afford the corresponding product **6c** as yellow oil (97.6 mg, 86% yield), *R*<sub>f</sub> = 0.4 (PE/EA = 5/1). **<sup>1</sup>H NMR (300 MHz, CDCl<sub>3</sub>)** δ 6.99 – 6.88 (m, 3H), 6.87 – 6.83 (m, 2H), 6.60 (s, 2H), 4.92 (s, 1H), 4.20 (q, *J* = 7.1 Hz, 4H), 3.69 (t, *J* = 4.6 Hz, 4H), 2.66 (t, *J* = 4.6 Hz, 4H), 1.49 (s, 3H), 1.29 – 1.24 (m, 24H) ppm. **<sup>13</sup>C NMR (75 MHz, CDCl<sub>3</sub>)** δ 171.9, 152.0, 149.8, 138.8, 136.8, 134.1, 130.1, 127.3, 126.9, 125.9, 125.3, 66.5, 61.1, 58.6, 50.2, 33.9, 30.2, 23.8, 14.0 ppm. **HRMS (ESI)** *m/z* Calcd for [C<sub>34</sub>H<sub>47</sub>NO<sub>6</sub> + H]<sup>+</sup> 566.3477, found 566.3475.

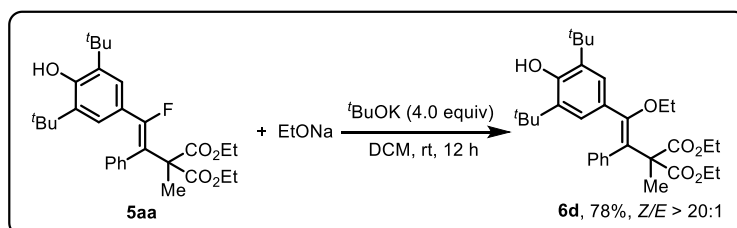

**diethyl (Z)-2-(2-(3,5-di-tert-butyl-4-hydroxyphenyl)-2-ethoxy-1-phenylvinyl)-2-methylmalonate (6d)** To an oven-dried 10 mL Schlenk tube equipped with a Teflon coated magnetic stir bar was added *t*BuOK (89.8 mg, 0.8 mmol, 4.0 equiv), **5aa** (99.7 mg, 0.2 mmol, 1.0 equiv) and EtONa (136.1 mg, 20 wt% in EtOH, 0.4 mmol, 2.0 equiv) then the Schlenk tube was evacuated and filled with argon for three times. After that,



anhydrous DCM (2 mL) was added under argon atmosphere via a syringe under argon atmosphere stirred for 12 h at rt. After the starting material was completely consumed, ice water (5 mL) was slowly added to quench the reaction. The reaction mixture was extracted with DCM (3 × 10 mL). The organic layers were combined and dried over anhydrous MgSO<sub>4</sub>. After removal of the solvent in vacuo, the residue was purified by flash chromatography on silica gel (PE/EA) to afford the corresponding product **6d** as colorless oil (81.9 mg, 78% yield, *Z/E* > 20:1), *R*<sub>f</sub> = 0.3 (PE/EA = 20/1). **<sup>1</sup>H NMR (300 MHz, CDCl<sub>3</sub>)** δ 7.33 – 7.27 (m, 2H), 7.25 – 7.20 (m, 5H), 5.25 (s, 1H), 4.29 – 4.10 (m, 2H), 3.94 – 3.81 (m, 4H), 1.42 (s, 3H), 1.32 – 1.19 (m, 27H) ppm. **<sup>13</sup>C NMR (75 MHz, CDCl<sub>3</sub>)** δ 172.7, 154.3, 149.0, 135.2, 134.9, 130.5, 128.6, 127.1, 124.7, 121.4, 121.1, 114.7, 64.1, 61.2, 59.3, 59.1, 34.3, 30.1, 17.3, 15.4, 15.3, 14.3 ppm. **HRMS (ESI) *m/z*** Calcd for [C<sub>32</sub>H<sub>44</sub>O<sub>6</sub> + H]<sup>+</sup> 525.3211, found 525.3217.

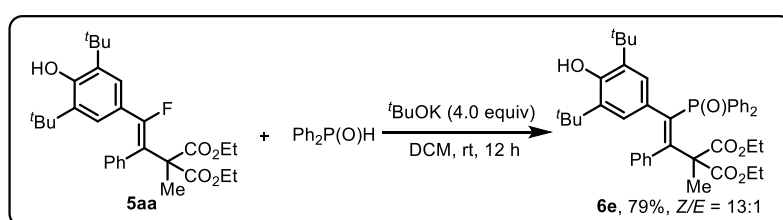

**diethyl (Z)-2-(2-(3,5-di-tert-butyl-4-hydroxyphenyl)-2-((diphenylphosphoryl)oxy)-1-phenylvinyl)-2-methylmalonate (6e)** To an oven-dried 10 mL Schlenk tube equipped with a Teflon coated magnetic stir bar was added *t*BuOK (89.8 mg, 0.8 mmol, 4.0 equiv), **5aa** (99.7 mg, 0.2 mmol, 1.0 equiv) and diphenylphosphine oxide (80.8 mg, 0.4 mmol, 2.0 equiv) then the Schlenk tube was evacuated and filled with argon for three times. After that, anhydrous DCM (2 mL) was added under argon atmosphere via a syringe under argon atmosphere stirred for 12 h at rt. After the starting material was completely consumed, ice water (5 mL) was slowly added to quench the reaction. The reaction mixture was extracted with DCM (3 × 10 mL). The organic layers were combined and dried over anhydrous MgSO<sub>4</sub>. After removal of the solvent in vacuo, the residue was purified by flash chromatography on silica gel (DCM/MeOH) to afford the corresponding product **6e** as a white solid (107.0 mg, 79% yield, *Z/E* = 13:1). **m.p.** 198 – 200 °C, *R*<sub>f</sub> = 0.3 (DCM/MeOH = 20/1). **<sup>1</sup>H NMR (300 MHz, CDCl<sub>3</sub>)** δ 7.48 – 7.41 (m, 4H), 7.20 – 7.04 (m, 10H), 6.99 – 6.90 (m, 3H), 5.02 (s, 1H), 3.90 (dq, *J* = 10.7, 7.1 Hz, 2H), 3.70 (dq, *J* = 10.7, 7.1 Hz, 2H), 1.29 (s, 18H), 1.20 (s, 3H), 1.14 (t, *J* = 7.15 Hz, 6H) ppm. **<sup>13</sup>C NMR (75 MHz, CDCl<sub>3</sub>)** δ 171.0 (d, *J* = 1.3 Hz), 153.3 (d, *J* = 11.1 Hz), 152.8 (d, *J* = 2.6 Hz), 140.6 (d, *J* = 91.4 Hz), 136.9 (d, *J* = 8.1 Hz), 135.4, 134.8 (d, *J* = 1.9 Hz), 134.1, 133.1 (d, *J* = 9.1 Hz), 131.2 (d, *J* = 1.6 Hz), 131.0 (d, *J* = 8.7 Hz), 130.1 (d, *J* = 2.8 Hz), 127.6 (d, *J* = 5.0 Hz), 127.4 (d, *J* = 12.0 Hz), 126.5, 62.4 (d, *J* = 12.8 Hz), 61.5, 34.2, 30.1, 24.1, 13.9 ppm. **<sup>31</sup>P NMR (121 MHz, CDCl<sub>3</sub>)** δ 24.84 ppm. **HRMS (ESI) *m/z*** Calcd for [C<sub>42</sub>H<sub>49</sub>O<sub>6</sub>P + Na]<sup>+</sup> 703.3159, found 703.3167.

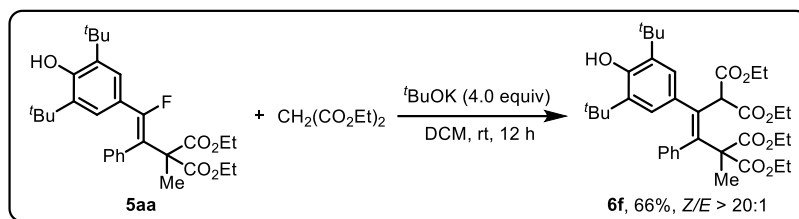

**tetraethyl (E)-2-(3,5-di-tert-butyl-4-hydroxyphenyl)-3-phenylpent-2-ene-1,1,4,4-tetracarboxylate (6f)** To an oven-dried 10 mL Schlenk tube equipped with a Teflon coated magnetic stir bar was added  $t\text{BuOK}$  (89.8 mg, 0.8 mmol, 4.0 equiv), **5aa** (99.7 mg, 0.2 mmol, 1.0 equiv) and dimethyl malonate (60.1 mg, 0.4 mmol, 2.0 equiv) then the Schlenk tube was evacuated and filled with argon for three times. After that, anhydrous DCM (2 mL) was added under argon atmosphere via a syringe under argon atmosphere stirred for 12 h at rt. After the starting material was completely consumed, ice water (5 mL) was slowly added to quench the reaction. The reaction mixture was extracted with DCM ( $3 \times 10$  mL). The organic layers were combined and dried over anhydrous  $\text{MgSO}_4$ . After removal of the solvent in vacuo, the residue was purified by flash chromatography on silica gel (PE/EA) to afford the corresponding product **6f** as a white solid (84.2 mg, 66% yield,  $Z/E > 20:1$ ). **m.p.** 163 – 165 °C,  $R_f = 0.4$  (PE/EA = 20/1).  **$^1\text{H}$  NMR (300 MHz,  $\text{CDCl}_3$ )**  $\delta$  7.35 – 7.26 (m, 7H), 5.15 (s, 1H), 4.21 (s, 1H), 3.93 – 3.82 (m, 6H), 3.77 – 3.69 (m, 2H), 1.42 (s, 18H), 1.25 (s, 3H), 1.13 (t,  $J = 7.1$  Hz, 6H), 1.02 (t,  $J = 7.1$  Hz, 6H) ppm.  **$^{13}\text{C}$  NMR (75 MHz,  $\text{CDCl}_3$ )**  $\delta$  171.3, 168.4, 153.2, 140.8, 140.2, 135.9, 134.4, 129.6, 128.4, 127.9, 127.5, 61.3, 61.1, 60.6, 59.9, 34.4, 30.4, 30.3, 24.2, 14.0 ppm. **HRMS (ESI)**  $m/z$  Calcd for  $[\text{C}_{37}\text{H}_{50}\text{O}_9 + \text{H}]^+$  639.3528, found 639.3548.

## 5. One-pot Reaction for the Synthesis of tetra-Substituted Alkene **6b**

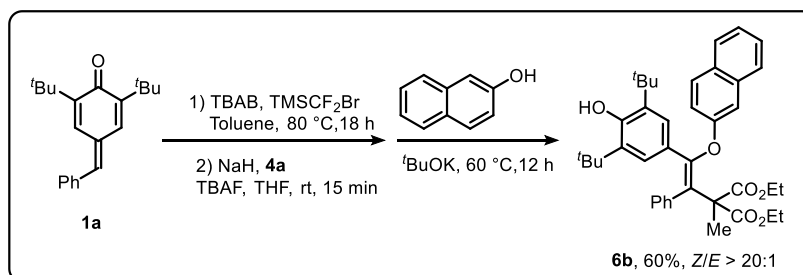

To an oven-dried 10-mL Schlenk tube equipped with a Teflon coated magnetic stir bar was added *p*-QM **1a** (147.2 mg, 0.5 mmol, 1.0 equiv) and TBAB (8.0 mg, 0.025 mmol, 5 mol%), then the Schlenk tube was evacuated and backfilled with argon for three times. After that, TMSCF<sub>2</sub>Br (203.1 mg, 1.0 mmol, 2.0 equiv) dissolved in toluene (1.0 mL) was added under argon atmosphere via a syringe. The reaction mixture was stirred at 80 °C (oil bath) for 18 h to afford the solution of intermediate **2a** in toluene.

To another oven-dried 10-mL Schlenk tube equipped with a Teflon coated magnetic stir bar was added NaH (60 mg, 1.5 mmol, 3.0 equiv), then the Schlenk tube was evacuated and backfilled with argon for three times. Compound **4a** (1.0 mmol, 2.0 equiv) dissolved in 1.0 mL anhydrous THF was added under argon atmosphere via a syringe, and the reaction mixture was stirred at room temperature for 30 min. Then the solution of crude **2a** in toluene was added, followed by the dropwise addition of TBAF (0.4 mmol, 0.4 equiv, 0.3 M solution in THF) under argon atmosphere. After stirring at room temperature for 15 min, <sup>t</sup>BuOK (224.4 mg, 2.0 mmol, 4.0 equiv) and 2-hydroxynaphthalene (144.2 mg, 1.0 mmol, 2.0 equiv) were directly added to the above-mentioned solution under argon atmosphere. After stirred at 60 °C for 12 h, saturated solution of NH<sub>4</sub>Cl (5.0 mL) was added to quench the reaction. The reaction mixture was extracted with ethyl acetate (3 × 10 mL). The organic layers were combined and dried over anhydrous MgSO<sub>4</sub>. After removal of the solvent in vacuo, the residue was purified by flash chromatography on silica gel (PE/EA) to afford the corresponding product **6b** (186.8 mg, 60% yield, Z/E > 20:1).

## 6. Optimization of Reaction Parameters for the Synthesis of **9aa**

**Table S1.** Base, Solvent Screening<sup>a, b</sup>

Reaction scheme: **2a** + **7a**  $\xrightarrow[2) \text{ TBAF, rt, 15 min}]{1) \text{ Base, rt, 30 min}}$  **9aa** + **8aa**

| Entry | Base                           | The equiv of base | Solvent | Yield of <b>9aa</b> (%) | Yield of <b>8aa</b> (%) |
|-------|--------------------------------|-------------------|---------|-------------------------|-------------------------|
| 1     | <sup>t</sup> BuOK              | 3.0               | DCM     | 51                      | 41                      |
| 2     | <sup>t</sup> BuONa             | 3.0               | DCM     | 45                      | 29                      |
| 3     | KOH                            | 3.0               | DCM     | 17                      | 51                      |
| 4     | K <sub>2</sub> CO <sub>3</sub> | 3.0               | DCM     | n.d.                    | 71                      |
| 5     | DBU                            | 3.0               | DCM     | 9                       | 25                      |
| 6     | LDA                            | 3.0               | DCM     | n.d.                    | n.d.                    |
| 7     | <sup>t</sup> BuOK              | 2.0               | DCM     | 3                       | 60                      |
| 8     | <sup>t</sup> BuOK              | 2.5               | DCM     | 20                      | 50                      |
| 9     | <sup>t</sup> BuOK              | 3.5               | DCM     | 49                      | 40                      |
| 10    | <sup>t</sup> BuOK              | 4.0               | DCM     | 65                      | 30                      |
| 11    | <sup>t</sup> BuOK              | 4.0               | Toluene | 18                      | 77                      |
| 12    | <sup>t</sup> BuOK              | 4.0               | DMF     | 8                       | 60                      |
| 13    | <sup>t</sup> BuOK              | 4.0               | MTBE    | 48                      | 46                      |
| 14    | <sup>t</sup> BuOK              | 4.0               | HMPA    | 4                       | 69                      |

<sup>a</sup> <sup>t</sup>BuOK (0.8 mmol, 4.0 equiv) and **7a** (0.4 mmol, 2.0 equiv) in DCM were stirred at rt for 30 min. Then TBAF (1 M in THF) and **2a** (0.2 mmol, 1.0 equiv) were added under Ar. <sup>b</sup>The yields were determined by <sup>1</sup>H NMR analysis with 1,3,5-trimethoxybenzene as internal standard.

**Table S2.** Screening of temperature and the equivalent of TBAF<sup>a, b</sup>

| Entry | Temperature (°C) | The equiv of TBAF | Yield of <b>9aa</b> (%) | Yield of <b>8aa</b> (%) |
|-------|------------------|-------------------|-------------------------|-------------------------|
| 1     | r.t.             | 1.1               | 65                      | 30                      |
| 2     | 40               | 1.1               | 60                      | 36                      |
| 3     | 60               | 1.1               | 79                      | 13                      |
| 4     | 80               | 1.1               | 78                      | 5                       |
| 5     | 100              | 1.1               | 76                      | n.d.                    |
| 6     | 60               | 0.2               | 72                      | 8                       |
| 7     | 60               | 0.4               | 85                      | 3                       |
| 8     | 60               | 0.6               | 80                      | 13                      |
| 9     | 60               | 0.8               | 78                      | 5                       |
| 10    | 60               | 1.0               | 75                      | 23                      |

<sup>a</sup>**7a** (0.4 mmol, 2.0 equiv) and <sup>t</sup>BuOK (0.8 mmol, 4.0 equiv) in DCM were stirred at rt for 30 min. Then TBAF (1 M in THF) and **2a** (0.2 mmol, 1.0 equiv) were added under Ar. <sup>b</sup>The yields were determined by <sup>1</sup>H NMR analysis with 1,3,5-trimethoxybenzene as internal standard.

## 7. General Procedure B for the Synthesis of Product 9

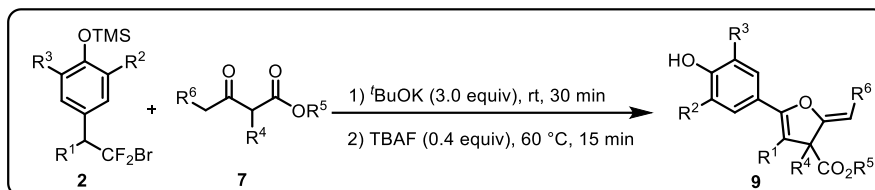

To an oven-dried 10 mL Schlenk tube equipped with a Teflon coated magnetic stir bar was added *t*BuOK (89.7 mg, 0.8 mmol, 4.0 equiv), then the Schlenk tube was evacuated and filled with argon for three times. After that, compound **7** (0.4 mmol, 2.0 equiv) dissolved in 1.0 mL anhydrous DCM was added under argon atmosphere via a syringe. The above-mentioned solution was stirred at room temperature for 30 min, followed by the sequential addition of TBAF (0.08 mL, 0.4 equiv, 1 M solution in THF, dissolved in 0.5 mL DCM) and **2** (0.2 mmol in 0.5 mL DCM) under argon atmosphere. After the starting material was completely consumed (typically 15 min at 60 °C), ice water (5 mL) was slowly added to quench the reaction. The reaction mixture was extracted with DCM (3 × 10 mL). The organic layers were combined and dried over anhydrous MgSO<sub>4</sub>. After removal of the solvent in vacuo, the residue was purified by flash chromatography on silica gel (PE/EA) to afford the corresponding product **9**.

### *ethyl 5-(3,5-di-tert-butyl-4-hydroxyphenyl)-3-methyl-2-methylene-4-phenyl-2,3-dihydrofuran-3-carboxylate (9aa)*

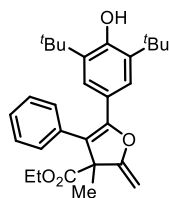

Prepared through general procedure B to give **9aa** in 70.9 mg, 79% yield, white solid, m.p. 165 – 166 °C, *R*<sub>f</sub> = 0.6 (PE/EA = 20/1). <sup>1</sup>H NMR (300 MHz, CDCl<sub>3</sub>) δ 7.37 – 7.22 (m, 7H), 5.31 (s, 1H), 4.74 (d, *J* = 2.7 Hz, 1H), 4.31 (d, *J* = 2.6 Hz, 1H), 4.26 – 4.16 (m, 2H), 1.56 (s, 3H), 1.28 – 1.23 (m, 21H) ppm. <sup>13</sup>C NMR (75 MHz, CDCl<sub>3</sub>) δ 172.7, 165.1, 154.6, 150.7, 135.5, 133.9, 130.4, 128.8, 127.6, 124.6, 120.7, 114.4, 83.8, 61.7, 60.0, 34.4, 30.1, 23.9, 14.2 ppm. HRMS (ESI) *m/z* Calcd for [C<sub>29</sub>H<sub>36</sub>O<sub>4</sub> + H]<sup>+</sup> 449.2686, found 449.2698.

### *ethyl 5-(3,5-di-tert-butyl-4-hydroxyphenyl)-3-methyl-2-methylene-4-(p-tolyl)-2,3-dihydrofuran-3-carboxylate (9ab)*

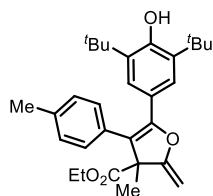

Prepared through general procedure B to give **9ab** in 62.8 mg, 68% yield, yellow solid, m.p. 130 – 131 °C, *R*<sub>f</sub> = 0.6 (PE/EA = 20/1). <sup>1</sup>H NMR (300 MHz, CDCl<sub>3</sub>) δ 7.23 (s, 1H), 7.18 – 7.05 (m, 2H), 5.28 (s, 1H), 4.71 (d, *J* = 2.6 Hz, 1H), 4.28 (d, *J* = 2.6 Hz, 1H), 4.23 – 4.12 (m, 2H), 2.33 (s, 3H), 1.53 (s, 3H), 1.34 – 1.22 (m, 21H) ppm. <sup>13</sup>C NMR (75 MHz, CDCl<sub>3</sub>) δ 172.7, 165.1, 154.5, 150.4, 137.3, 135.5, 130.7, 130.3, 129.5, 124.5, 120.8, 114.4, 83.7, 61.6, 60.0, 34.4, 30.1, 23.9, 21.3, 14.2 ppm. HRMS (ESI) *m/z* Calcd for [C<sub>30</sub>H<sub>38</sub>O<sub>4</sub> + H]<sup>+</sup> 463.2843, found 463.2857.

**ethyl 5-(3,5-di-tert-butyl-4-hydroxyphenyl)-4-(4-methoxyphenyl)-3-methyl-2-methylene-2,3-dihydrofuran-3-carboxylate (9ac)**

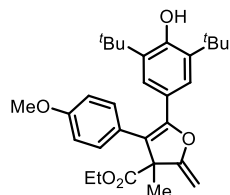

Prepared through general procedure B to give **9ac** in 66.9 mg, 70% yield, yellow solid, m.p. 146 – 147 °C,  $R_f$  = 0.5 (PE/EA = 20/1). **<sup>1</sup>H NMR (300 MHz, CDCl<sub>3</sub>)**  $\delta$  7.26 (s, 2H), 7.17 – 7.12 (m, 2H), 6.90 – 6.85 (m, 2H), 5.30 (s, 1H), 4.72 (d,  $J$  = 2.6 Hz, 1H), 4.28 (d,  $J$  = 2.6 Hz, 1H), 4.24 – 4.14 (m, 2H), 3.80 (s, 3H), 1.53 (s, 3H), 1.28 – 1.22 (m, 21H) ppm. **<sup>13</sup>C NMR (75 MHz, CDCl<sub>3</sub>)**  $\delta$  172.7, 165.1, 159.2, 154.5, 150.4, 135.4, 131.6, 125.9, 124.4, 120.8, 114.4, 114.0, 83.7, 61.6, 59.9, 55.5, 34.4, 30.1, 23.9, 14.2 ppm. **HRMS (ESI)**  $m/z$  Calcd for [C<sub>30</sub>H<sub>38</sub>O<sub>5</sub> + H]<sup>+</sup> 479.2792, found 479.2807.

**ethyl 4-([1,1'-biphenyl]-4-yl)-5-(3,5-di-tert-butyl-4-hydroxyphenyl)-3-methyl-2-methylene-2,3-dihydrofuran-3-carboxylate (9ad)**

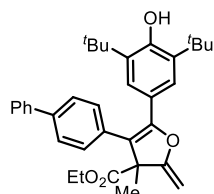

Prepared through general procedure B to give **9ad** in 68.1 mg, 65% yield, yellow solid, m.p. 156 – 157 °C,  $R_f$  = 0.6 (PE/EA = 20/1). **<sup>1</sup>H NMR (300 MHz, CDCl<sub>3</sub>)** 7.71 – 7.67 (m, 4H), 7.57 (t,  $J$  = 7.3 Hz, 2H), 7.50 – 7.36 (m, 5H), 5.44 (s, 1H), 4.88 (d,  $J$  = 2.7 Hz, 1H), 4.45 (d,  $J$  = 2.7 Hz, 1H), 4.40 – 4.27 (m, 2H), 1.72 (s, 3H), 1.40 – 1.37 (m, 21H) ppm. **<sup>13</sup>C NMR (75 MHz, CDCl<sub>3</sub>)**  $\delta$  172.7, 165.0, 154.6, 150.9, 141.1, 140.5, 135.5, 132.9, 130.8, 128.9, 127.6, 127.4, 127.2, 124.6, 120.6, 114.0, 84.0, 61.7, 59.9, 34.4, 30.1, 24.0, 14.2 ppm. **HRMS (ESI)**  $m/z$  Calcd for [C<sub>35</sub>H<sub>40</sub>O<sub>4</sub> + H]<sup>+</sup> 525.2999, found 525.3014.

**ethyl 4-(4-chlorophenyl)-5-(3,5-di-tert-butyl-4-hydroxyphenyl)-3-methyl-2-methylene-2,3-dihydrofuran-3-carboxylate (9ae)**

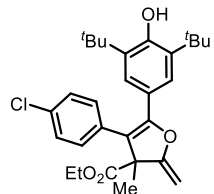

Prepared through general procedure B to give **9ae** in 64.6 mg, 67% yield, purple solid, m.p. 141 – 142 °C,  $R_f$  = 0.6 (PE/EA = 20/1). **<sup>1</sup>H NMR (300 MHz, CDCl<sub>3</sub>)**  $\delta$  7.35 – 7.32 (m, 2H), 7.24 (s, 2H), 7.21 – 7.18 (m, 2H), 5.37 (s, 1H), 4.77 (d,  $J$  = 2.8 Hz, 1H), 4.35 (d,  $J$  = 2.7 Hz, 1H), 4.28 – 4.15 (m, 2H), 1.57 (s, 3H), 1.32 – 1.24 (m, 21H) ppm. **<sup>13</sup>C NMR (75 MHz, CDCl<sub>3</sub>)**  $\delta$  172.5, 164.7, 154.8, 151.2, 135.6, 133.5, 132.5, 131.8, 129.0, 124.6, 120.3, 113.0, 84.3, 61.8, 59.7, 34.4, 30.1, 23.9, 14.2 ppm. **HRMS (ESI)**  $m/z$  Calcd for [C<sub>29</sub>H<sub>35</sub>ClO<sub>4</sub> + H]<sup>+</sup> 483.2297, found 483.2312.

**ethyl 5-(3,5-di-tert-butyl-4-hydroxyphenyl)-4-(4-(methoxycarbonyl)phenyl)-3-methyl-2-methylene-2,3-dihydrofuran-3-carboxylate (9af)**

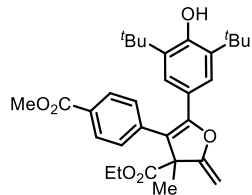

Prepared through general procedure B to give **9af** in 57.7 mg, 57% yield, yellow solid, m.p. 135 – 136 °C,  $R_f$  = 0.5 (PE/EA = 20/1). **<sup>1</sup>H NMR (300 MHz, CDCl<sub>3</sub>)**  $\delta$  7.98 (d,  $J$  = 8.4 Hz, 2H), 7.30 (d,  $J$  = 8.4 Hz, 2H), 7.23 (s, 2H), 5.36 (s, 1H), 4.75 (d,  $J$  = 2.8 Hz, 1H), 4.34 (d,  $J$  = 2.8 Hz, 1H), 4.26 – 4.12 (m, 2H), 3.92 (s, 2H), 1.55 (s, 3H), 1.27 – 1.20 (m, 21H) ppm. **<sup>13</sup>C NMR (75 MHz, CDCl<sub>3</sub>)**  $\delta$  172.4, 167.0, 164.7, 155.0, 151.9, 139.2, 135.7, 130.1, 130.0, 128.9, 124.9, 120.2, 113.4, 84.4, 61.8, 59.6, 52.3, 34.4, 30.1, 23.9, 14.2 ppm. **HRMS (ESI)**  $m/z$  Calcd for [C<sub>31</sub>H<sub>38</sub>O<sub>6</sub> + H]<sup>+</sup>

507.2741, found 507.2751.

**ethyl 5-(3,5-di-tert-butyl-4-hydroxyphenyl)-3-methyl-2-methylene-4-(4-nitrophenyl)-2,3-dihydrofuran-3-carboxylate (9ag)**

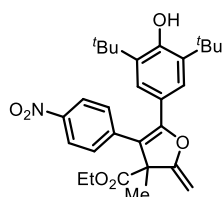

Prepared through general procedure B to give **9ag** in 45.4 mg, 46% yield, yellow solid, m.p. 185 – 186 °C,  $R_f$  = 0.5 (PE/EA = 20/1).  $^1\text{H}$  NMR (300 MHz,  $\text{CDCl}_3$ )  $\delta$  8.15 (d,  $J$  = 8.6 Hz, 2H), 7.37 (d,  $J$  = 8.7 Hz, 2H), 7.22 (s, 2H), 5.42 (s, 1H), 4.78 (d,  $J$  = 2.9 Hz, 1H), 4.39 (d,  $J$  = 2.9 Hz, 1H), 4.30 – 4.14 (m, 2H), 1.58 (s, 3H), 1.29 – 1.21 (m, 21H) ppm.  $^{13}\text{C}$  NMR (75 MHz,  $\text{CDCl}_3$ )  $\delta$  172.4, 164.4, 155.5, 153.7, 146.6, 141.6, 136.0, 130.5, 125.2, 123.9, 119.9, 112.4, 85.1, 62.0, 59.3, 34.5, 30.1, 24.0, 14.2 ppm. HRMS (ESI)  $m/z$  Calcd for  $[\text{C}_{29}\text{H}_{35}\text{NO}_6 + \text{H}]^+$  494.2537, found 494.2547.

**ethyl 5-(3,5-di-tert-butyl-4-hydroxyphenyl)-3-methyl-2-methylene-4-(4-(trifluoromethyl)phenyl)-2,3-dihydrofuran-3-carboxylate (9ah)**

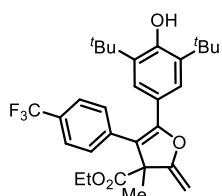

Prepared through general procedure B to give **9ah** in 64.0 mg, 62% yield, white solid, m.p. 140 – 141 °C,  $R_f$  = 0.7 (PE/EA = 20/1).  $^1\text{H}$  NMR (300 MHz,  $\text{CDCl}_3$ )  $\delta$  7.62 (d,  $J$  = 7.9 Hz, 2H), 7.38 (d,  $J$  = 8.0 Hz, 2H), 7.20 (s, 2H), 5.38 (s, 1H), 4.79 (d,  $J$  = 2.6 Hz, 1H), 4.38 (d,  $J$  = 2.6 Hz, 1H), 4.27 – 4.20 (m, 2H), 1.59 (s, 3H), 1.36 – 1.25 (m, 21H) ppm.  $^{13}\text{C}$  NMR (75 MHz,  $\text{CDCl}_3$ )  $\delta$  172.4, 164.6, 155.0, 151.9, 130.2, 129.6 (q,  $^2J$  = 32.4 Hz), 125.7 (q,  $^3J$  = 3.8 Hz), 124.7, 124.3 (q,  $^1J$  = 270.2 Hz), 120.1, 112.9, 84.6, 61.9, 59.7, 34.4, 30.1, 24.0, 14.2 ppm.  $^{19}\text{F}$  NMR (282 MHz,  $\text{CDCl}_3$ )  $\delta$  -62.76 ppm. HRMS (ESI)  $m/z$  Calcd for  $[\text{C}_{30}\text{H}_{35}\text{F}_3\text{O}_4 + \text{H}]^+$  517.2560, found 517.2559.

**ethyl 5-(3,5-di-tert-butyl-4-hydroxyphenyl)-4-(3-methoxyphenyl)-3-methyl-2-methylene-2,3-dihydrofuran-3-carboxylate (9ai)**

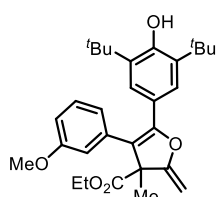

Prepared through general procedure B to give **9ai** in 66.9 mg, 70% yield, yellow solid, m.p. 150 – 151 °C,  $R_f$  = 0.6 (PE/EA = 20/1).  $^1\text{H}$  NMR (300 MHz,  $\text{CDCl}_3$ )  $\delta$  7.27 (s, 2H), 7.26 – 7.22 (m, 1H), 6.85 – 6.76 (m, 3H), 5.31 (s, 1H), 4.72 (d,  $J$  = 2.6 Hz, 1H), 4.29 (d,  $J$  = 2.7 Hz, 1H), 4.25 – 4.15 (m, 2H), 3.74 (s, 3H), 1.54 (s, 3H), 1.28 – 1.23 (m, 21H) ppm.  $^{13}\text{C}$  NMR (75 MHz,  $\text{CDCl}_3$ )  $\delta$  172.7, 165.0, 160.0, 154.6, 150.7, 135.5, 135.1, 129.8, 124.6, 122.8, 120.6, 115.8, 114.2, 113.3, 83.8, 61.7, 59.9, 55.3, 34.4, 30.2, 23.9, 14.2 ppm. HRMS (ESI)  $m/z$  Calcd for  $[\text{C}_{30}\text{H}_{38}\text{O}_5 + \text{H}]^+$  479.2792, found 479.2808.

**ethyl 5-(3,5-di-tert-butyl-4-hydroxyphenyl)-3-methyl-2-methylene-4-(3-nitrophenyl)-2,3-dihydrofuran-3-carboxylate (9aj)**

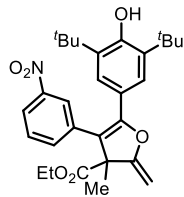

Prepared through general procedure B to give **9aj** in 52.3 mg, 53% yield, green solid, m.p. 133 – 134 °C,  $R_f$  = 0.5 (PE/EA = 20/1).  $^1\text{H}$  NMR (300 MHz,  $\text{CDCl}_3$ )  $\delta$  8.16 – 8.12 (m, 2H), 7.59 – 7.48 (m, 2H), 7.20 (s, 2H), 5.39 (s, 1H), 4.79 (d,  $J$  = 2.8 Hz, 1H), 4.39 (d,  $J$  = 2.9 Hz, 1H), 4.32 – 4.14 (m, 2H), 1.58 (s, 3H), 1.29 – 1.25 (m, 21H) ppm.  $^{13}\text{C}$



**NMR (75 MHz, CDCl<sub>3</sub>)**  $\delta$  172.3, 164.3, 155.2, 152.6, 148.6, 136.7, 136.1, 135.9, 129.7, 125.2, 124.8, 122.3, 119.8, 111.7, 85.0, 62.1, 59.5, 34.4, 30.1, 24.1, 14.2 ppm. **HRMS (ESI)**  $m/z$  Calcd for [C<sub>29</sub>H<sub>35</sub>NO<sub>6</sub> + H]<sup>+</sup> 494.2537, found 494.2548.

**ethyl 5-(3,5-di-tert-butyl-4-hydroxyphenyl)-4-(2-methoxyphenyl)-3-methyl-2-methylene-2,3-dihydrofuran-3-carboxylate (9ak)**

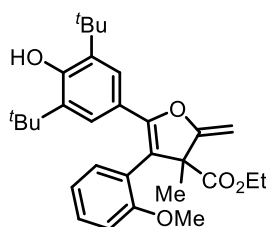

Prepared through general procedure B to give **9ak** in 67.9 mg, 71% yield, green solid, m.p. 159 – 160 °C,  $R_f$  = 0.5 (PE/EA = 20/1). **<sup>1</sup>H NMR (300 MHz, CDCl<sub>3</sub>)**  $\delta$  7.27 (s, 2H), 7.26 – 7.22 (m, 1H), 6.84 – 6.76 (m, 3H), 5.31 (s, 1H), 4.75 (d,  $J$  = 2.6 Hz, 1H), 4.32 (d,  $J$  = 2.7 Hz, 1H), 4.25 – 4.15 (m, 2H), 3.74 (s, 3H), 1.54 (s, 3H), 1.28 – 1.23 (m, 21H) ppm. **<sup>13</sup>C NMR (75 MHz, CDCl<sub>3</sub>)**  $\delta$  172.7, 165.0, 160.0, 154.6, 150.7, 135.5, 135.1, 129.8, 124.6, 122.8, 120.6, 115.8, 114.2, 113.3, 83.8, 61.7, 59.9, 55.3, 34.4, 30.1, 23.9, 14.2 ppm. **HRMS (ESI)**  $m/z$  Calcd for [C<sub>30</sub>H<sub>38</sub>O<sub>5</sub> + H]<sup>+</sup> 479.2792, found 479.2806.

**ethyl 4-(2-chlorophenyl)-5-(3,5-di-tert-butyl-4-hydroxyphenyl)-3-methyl-2-methylene-2,3-dihydrofuran-3-carboxylate (9al)**

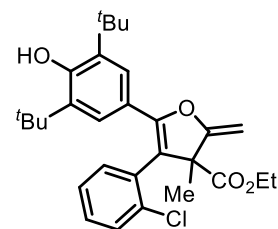

Prepared through general procedure B to give **9al** in 75.2 mg, 78% yield, yellow solid, m.p. 115 – 116 °C,  $R_f$  = 0.4 (PE/EA = 20/1). **<sup>1</sup>H NMR (300 MHz, CDCl<sub>3</sub>)**  $\delta$  7.39 – 7.35 (m, 1H), 7.20 – 7.12 (m, 5H), 5.23 (s, 1H), 4.70 (d,  $J$  = 2.6 Hz, 1H), 4.21 (d,  $J$  = 2.8 Hz, 1H), 4.18 – 4.09 (m, 2H), 1.47 (s, 3H), 1.26 – 1.13 (m, 21H) ppm. **<sup>13</sup>C NMR (75 MHz, CDCl<sub>3</sub>)**  $\delta$  172.3, 165.0, 154.8, 151.6, 136.3, 135.6, 132.9, 132.5, 130.2, 129.3, 127.2, 123.9, 120.6, 109.8, 84.4, 61.7, 34.4 (two overlapping carbon signals), 30.1 (two overlapping carbon signals), 14.2 ppm. **HRMS (ESI)**  $m/z$  Calcd for [C<sub>29</sub>H<sub>35</sub>ClO<sub>4</sub> + H]<sup>+</sup> 483.2297, found 483.2312.

**ethyl 4-(2-bromophenyl)-5-(3,5-di-tert-butyl-4-hydroxyphenyl)-3-methyl-2-methylene-2,3-dihydrofuran-3-carboxylate (9am)**

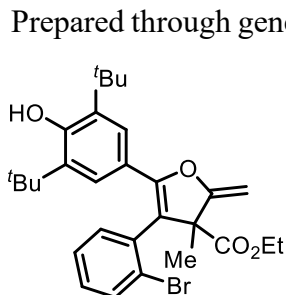

Prepared through general procedure B to give **9am** in 86.3 mg, 82% yield, yellow solid, m.p. 119 – 120 °C,  $R_f$  = 0.4 (PE/EA = 20/1). **<sup>1</sup>H NMR (300 MHz, CDCl<sub>3</sub>)**  $\delta$  7.69 (d,  $J$  = 8.0 Hz, 1H), 7.37 – 7.18 (m, 5H), 5.35 (s, 1H), 4.79 (d,  $J$  = 2.4 Hz, 1H), 4.32 – 4.26 (m, 3H), 1.60 (s, 3H), 1.35 – 1.27 (m, 21H) ppm. **<sup>13</sup>C NMR (75 MHz, CDCl<sub>3</sub>)**  $\delta$  172.5, 165.0, 154.8, 151.5, 135.5, 134.9, 133.5, 132.2, 129.5, 127.9, 127.2, 123.9, 120.6, 111.3, 84.1, 61.7, 61.4, 34.4, 30.1, 22.7, 14.2 ppm. **HRMS (ESI)**  $m/z$  Calcd for [C<sub>29</sub>H<sub>35</sub>BrO<sub>4</sub> + H]<sup>+</sup> 527.1791, found 527.1802.

**ethyl 5-(3,5-di-tert-butyl-4-hydroxyphenyl)-3-methyl-2-methylene-4-(1-tosyl-1H-indol-5-yl)-2,3-dihydrofuran-3-carboxylate (9an)**

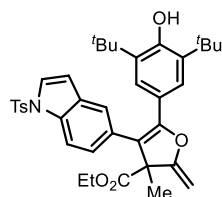

Prepared through general procedure B to give **9an** in 55.1 mg, 43% yield, white solid, m.p. 199 – 200 °C,  $R_f$  = 0.5 (PE/EA = 20/1). **<sup>1</sup>H NMR (300 MHz, CDCl<sub>3</sub>)**  $\delta$  8.03 (d,  $J$  = 8.3 Hz, 1H), 7.83 (d,  $J$  = 7.9 Hz, 2H), 7.52 (s, 1H), 7.33 – 7.25 (m, 3H), 7.17 – 7.07 (m, 4H), 5.27 (s, 1H), 4.82 (d,  $J$  = 2.7 Hz, 1H), 4.40 (d,  $J$  = 2.7 Hz, 1H), 4.19 – 4.10 (m, 2H), 2.37 (s, 3H), 1.57 (s, 3H), 1.14 (t,  $J$  = 7.1 Hz, 3H), 1.03 (s, 18H) ppm. **<sup>13</sup>C NMR (75 MHz, CDCl<sub>3</sub>)**  $\delta$  172.5, 164.5, 154.7, 152.2, 145.1, 135.3, 135.1, 135.0, 130.4, 130.1, 127.1, 125.0, 124.4, 124.2, 123.3, 121.8, 120.1, 115.5, 113.6, 104.2, 84.6, 61.8, 60.1, 34.1, 29.7, 24.4, 21.7, 14.1 ppm. **HRMS (ESI)**  $m/z$  Calcd for [C<sub>38</sub>H<sub>43</sub>NO<sub>6</sub>S + H]<sup>+</sup> 642.2884, found 642.2900.

**ethyl 5-(3,5-di-tert-butyl-4-hydroxyphenyl)-3-methyl-2-methylene-4-(thiophen-2-yl)-2,3-dihydrofuran-3-carboxylate (9ao)**

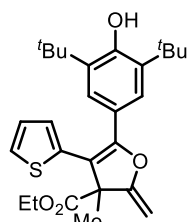

Prepared through general procedure B to give **9ao** in 55.4 mg, 61% yield, yellow solid, m.p. 135 – 136 °C,  $R_f$  = 0.6 (PE/EA = 20/1). **<sup>1</sup>H NMR (300 MHz, CDCl<sub>3</sub>)**  $\delta$  7.29 (s, 2H), 7.22 – 7.18 (m, 1H), 6.95 – 6.92 (m, 1H), 6.82 – 6.81 (m, 1H), 5.29 (s, 1H), 4.66 (d,  $J$  = 2.8 Hz, 1H), 4.26 (d,  $J$  = 2.9 Hz, 1H), 4.18 – 4.07 (m, 2H), 1.51 (s, 3H), 1.25 – 1.16 (m, 21H) ppm. **<sup>13</sup>C NMR (75 MHz, CDCl<sub>3</sub>)**  $\delta$  172.4, 164.6, 155.0, 152.4, 135.6, 134.6, 128.1, 127.4, 126.5, 124.8, 120.2, 107.6, 84.5, 61.8, 59.7, 34.4, 30.2, 24.0, 14.2 ppm. **HRMS (ESI)**  $m/z$  Calcd for [C<sub>27</sub>H<sub>34</sub>O<sub>4</sub>S + H]<sup>+</sup> 455.2251, found 455.2264.

**ethyl 4-cyclopropyl-5-(3,5-di-tert-butyl-4-hydroxyphenyl)-3-methyl-2-methylene-2,3-dihydrofuran-3-carboxylate (9ap)**

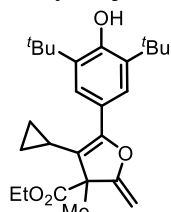

Prepared through general procedure B to give **9ap** in 35 mg, 42% yield, white solid, m.p. 134 – 136 °C,  $R_f$  = 0.5 (PE/EA = 20/1). **<sup>1</sup>H NMR (300 MHz, CDCl<sub>3</sub>)**  $\delta$  7.65 (s, 2H), 5.37 (s, 1H), 4.59 (d,  $J$  = 2.6 Hz, 1H), 4.24 – 4.07 (m, 3H), 1.60 (s, 3H), 1.52 – 1.47 (m, 19H), 1.23 (t,  $J$  = 7.1 Hz, 3H), 0.85 – 0.68 (m, 2H), 0.55 – 0.47 (m, 1H), 0.41 – 0.33 (m, 3H) ppm. **<sup>13</sup>C NMR (75 MHz, CDCl<sub>3</sub>)**  $\delta$  173.6, 165.2, 154.3, 151.6, 135.5, 124.8, 121.4, 113.6, 83.0, 61.5, 59.3, 34.6, 30.4, 24.4, 14.1, 7.4, 6.9, 6.2 ppm. **HRMS (ESI)**  $m/z$  Calcd for [C<sub>26</sub>H<sub>36</sub>O<sub>4</sub> + H]<sup>+</sup> 413.2686, found 413.2689.

**ethyl 5-(3-(tert-butyl)-4-hydroxy-5-methylphenyl)-3-methyl-2-methylene-4-phenyl-2,3-dihydrofuran-3-carboxylate (9aq)**

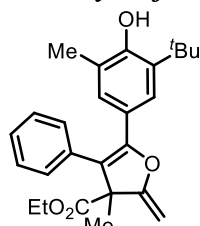

Prepared through general procedure B to give **9aq** in 51.9 mg, 64% yield, yellow solid, m.p. 81 – 82 °C,  $R_f$  = 0.5 (PE/EA = 20/1). **<sup>1</sup>H NMR (300 MHz, CDCl<sub>3</sub>)**  $\delta$  7.34 – 7.18 (m, 6H), 7.07 (s, 1H), 4.92 (s, 1H), 4.71 (d,  $J$  = 2.7 Hz, 1H), 4.30 (d,  $J$  = 2.4 Hz, 1H), 4.23 – 4.16 (m, 2H), 2.16 (s, 3H), 1.54 (s, 3H), 1.24 (t,  $J$  = 7.0 Hz, 3H), 1.16 (s, 9H) ppm. **<sup>13</sup>C NMR (75 MHz, CDCl<sub>3</sub>)**  $\delta$  172.7, 165.0, 153.4, 150.4,

135.2, 133.7, 130.3, 128.8, 127.6, 127.6, 125.2, 122.8, 121.2, 114.6, 83.9, 61.7, 59.9, 34.5, 29.5, 23.8, 16.0, 14.2 ppm. **HRMS (ESI)  $m/z$**  Calcd for  $[C_{26}H_{30}O_4 + H]^+$  407.2217, found 407.2230.

**ethyl 5-(3,5-di-tert-butyl-4-hydroxyphenyl)-3-ethyl-2-methylene-4-phenyl-2,3-dihydrofuran-3-carboxylate (9ba)**

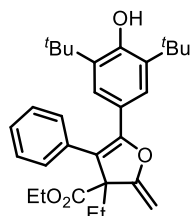

Prepared through general procedure B to give **9ba** in 65.6 mg, 71% yield, white solid, m.p. 183 – 184 °C,  $R_f$  = 0.5 (PE/EA = 20/1).  **$^1H$  NMR (300 MHz,  $CDCl_3$ )**  $\delta$  7.34 – 7.19 (m, 7H), 5.31 (s, 1H), 4.80 (d,  $J$  = 2.6 Hz, 1H), 4.23 (d,  $J$  = 2.7 Hz, 1H), 4.23 – 4.11 (m, 2H), 1.95 (q,  $J$  = 7.4 Hz, 2H), 1.27 (s, 18H), 1.21 (t,  $J$  = 7.1 Hz, 3H), 0.94 (t,  $J$  = 7.4 Hz, 3H) ppm.  **$^{13}C$  NMR (75 MHz,  $CDCl_3$ )**  $\delta$  172.7, 162.5, 154.6, 151.8, 135.4, 133.9, 130.2, 128.8, 127.5, 124.7, 120.6, 111.5, 84.1, 65.1, 61.5, 34.4, 30.1, 27.6, 14.2, 8.5 ppm. **HRMS (ESI)  $m/z$**  Calcd for  $[C_{30}H_{38}O_4 + H]^+$  463.2843, found 463.2860.

**ethyl 5-(3,5-di-tert-butyl-4-hydroxyphenyl)-3-isopropyl-2-methylene-4-phenyl-2,3-dihydrofuran-3-carboxylate (9ca)**

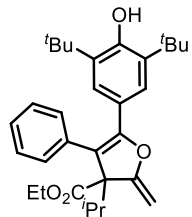

Prepared through general procedure B to give **9ca** in 42.8 mg, 45% yield, purple solid, m.p. 141 – 142 °C,  $R_f$  = 0.7 (PE/EA = 20/1).  **$^1H$  NMR (300 MHz,  $CDCl_3$ )**  $\delta$  7.48 – 7.37 (m, 5H), 7.31 (s, 2H), 5.40 (s, 1H), 5.04 (d,  $J$  = 2.5 Hz, 1H), 4.46 (d,  $J$  = 2.5 Hz, 1H), 4.27 (q,  $J$  = 7.1 Hz, 2H), 2.65 – 2.56 (m, 1H), 1.38 (s, 18H), 1.27 (t,  $J$  = 7.2 Hz, 3H), 1.17 (d,  $J$  = 6.6 Hz, 3H), 1.03 (d,  $J$  = 6.8 Hz, 3H) ppm.  **$^{13}C$  NMR (75 MHz,  $CDCl_3$ )**  $\delta$  171.6, 161.0, 154.4, 151.3, 135.3, 134.8, 130.9, 128.7, 127.5, 124.8, 120.7, 111.8, 86.7, 69.1, 61.2, 34.3, 33.4, 30.1, 18.1, 16.9, 14.1 ppm. **HRMS (ESI)  $m/z$**  Calcd for  $[C_{31}H_{40}O_4 + H]^+$  477.2999, found 477.3012.

**ethyl 3-benzyl-5-(3,5-di-tert-butyl-4-hydroxyphenyl)-2-methylene-4-phenyl-2,3-dihydrofuran-3-carboxylate (9da)**

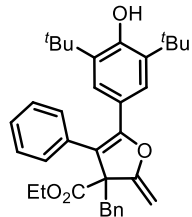

Prepared through general procedure B to give **9da** in 87.0 mg, 83% yield, yellow solid, m.p. 132 – 133 °C,  $R_f$  = 0.5 (PE/EA = 20/1).  **$^1H$  NMR (300 MHz,  $CDCl_3$ )**  $\delta$  7.39 – 7.31 (m, 3H), 7.26 – 7.20 (m, 9H), 5.41 (s, 1H), 4.92 (d,  $J$  = 2.9 Hz, 1H), 4.41 – 4.34 (m, 3H), 3.56 – 3.40 (m, 2H), 1.39 – 1.32 (m, 21H) ppm.  **$^{13}C$  NMR (75 MHz,  $CDCl_3$ )**  $\delta$  172.6, 162.2, 154.7, 152.4, 136.5, 135.5, 133.6, 130.6, 129.6, 128.5, 127.8, 127.1, 126.6, 125.1, 120.8, 112.4, 85.8, 64.5, 61.8, 41.1, 34.3, 30.2, 14.1 ppm. **HRMS (ESI)  $m/z$**  Calcd for  $[C_{35}H_{40}O_4 + H]^+$  525.2999, found 525.3011.

**benzyl 5-(3,5-di-tert-butyl-4-hydroxyphenyl)-3-methyl-2-methylene-4-phenyl-2,3-dihydrofuran-3-carboxylate (9ea)**

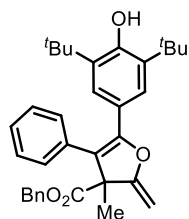

Prepared through general procedure B to give **9ea** in 71.4 mg, 70% yield, yellow solid, m.p. 177 – 178 °C,  $R_f$  = 0.6 (PE/EA = 20/1).  $^1\text{H}$  NMR (300 MHz,  $\text{CDCl}_3$ )  $\delta$  7.30 – 7.29 (m, 5H), 7.23 – 7.21 (m, 5H), 7.07 – 7.04 (m, 2H), 5.30 (s, 1H), 5.27 – 5.10 (m, 2H), 4.74 (d,  $J$  = 2.7 Hz, 1H), 4.29 (d,  $J$  = 2.7 Hz, 1H), 1.55 (s, 3H), 1.26 (s, 18H) ppm.  $^{13}\text{C}$  NMR (75 MHz,  $\text{CDCl}_3$ )  $\delta$  172.4, 164.8, 154.6, 150.9, 135.9, 135.5, 133.6, 130.3, 128.8, 128.5, 128.3, 128.2, 127.5, 124.7, 120.6, 114.2, 84.2, 67.2, 59.9, 34.3, 30.1, 23.7 ppm. HRMS (ESI)  $m/z$  Calcd for  $[\text{C}_{34}\text{H}_{38}\text{O}_4 + \text{H}]^+$  511.2843, found 511.2858.

**ethyl (Z)-5-(3,5-di-tert-butyl-4-hydroxyphenyl)-2-ethylidene-3-methyl-4-phenyl-2,3-dihydrofuran-3-carboxylate (9fa)**

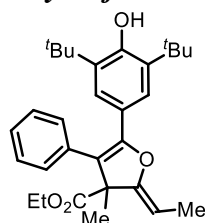

Prepared through general procedure B to give **9fa** in 52.8 mg, 57% yield, yellow solid, m.p. 164 – 166 °C,  $R_f$  = 0.5 (PE/EA = 20/1).  $^1\text{H}$  NMR (300 MHz,  $\text{CDCl}_3$ )  $\delta$  7.33 – 7.20 (m, 7H), 5.29 (s, 1H), 4.65 (q,  $J$  = 6.9 Hz, 1H), 4.26 – 4.09 (m, 2H), 1.79 (d,  $J$  = 6.9 Hz, 3H), 1.50 (s, 3H), 1.27 – 1.20 (m, 21H) ppm.  $^{13}\text{C}$  NMR (75 MHz,  $\text{CDCl}_3$ )  $\delta$  173.1, 157.6, 154.5, 150.4, 135.4, 134.1, 130.5, 128.7, 127.4, 124.6, 121.0, 114.2, 94.8, 61.5, 59.3, 34.3, 30.1, 23.9, 14.3, 10.6 ppm. HRMS (ESI)  $m/z$  Calcd for  $[\text{C}_{30}\text{H}_{38}\text{O}_4 + \text{H}]^+$  463.2843, found 463.2841.

**ethyl (Z)-2-benzylidene-5-(3,5-di-tert-butyl-4-hydroxyphenyl)-3-methyl-4-phenyl-2,3-dihydrofuran-3-carboxylate (9ga)**

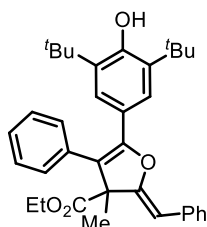

Prepared through general procedure B at room temperature to give **9ga** in 52.7 mg, 50% yield, yellow solid, m.p. 163 – 165 °C,  $R_f$  = 0.5 (PE/EA = 20/1).  $^1\text{H}$  NMR (300 MHz,  $\text{CDCl}_3$ )  $\delta$  7.75 (d,  $J$  = 7.6 Hz, 2H), 7.38 – 7.27 (m, 9H), 7.23 – 7.17 (m, 1H), 5.59 (s, 1H), 5.34 (s, 1H), 4.26 – 4.14 (m, 2H), 1.63 (s, 3H), 1.31 – 1.21 (m, 21H) ppm.  $^{13}\text{C}$  NMR (75 MHz,  $\text{CDCl}_3$ )  $\delta$  172.5, 158.2, 154.6, 150.6, 135.6, 133.5, 130.5, 128.9, 128.4, 128.3, 127.8, 126.0, 124.5, 120.6, 114.3, 100.5, 61.8, 61.5, 34.4, 30.1, 23.8, 14.3 ppm. HRMS (ESI)  $m/z$  Calcd for  $[\text{C}_{35}\text{H}_{40}\text{O}_4 + \text{H}]^+$  525.3000, found 525.2997.

**ethyl 2-(3,5-di-tert-butyl-4-hydroxyphenyl)-3-phenyl-5,6-dihydrobenzofuran-3a(4H)-carboxylate (9ha)**

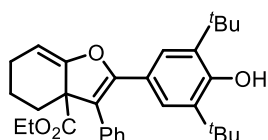

Prepared through general procedure B to give **9ha** in 40.1 mg, 42% yield, green solid, m.p. 165 – 167 °C,  $R_f$  = 0.4 (PE/EA = 20/1).  $^1\text{H}$  NMR (300 MHz,  $\text{CDCl}_3$ )  $\delta$  7.34 – 7.19 (m, 7H), 5.29 – 5.27 (m, 2H), 4.26 – 4.08 (m, 2H), 2.47 – 2.42 (m, 1H), 2.27 – 2.21 (m, 1H), 1.84 – 1.76 (m, 1H), 1.63 – 1.46 (m, 2H), 1.26 (s, 18H), 1.19 (t,  $J$  = 7.1 Hz, 3H) ppm.  $^{13}\text{C}$  NMR (75 MHz,  $\text{CDCl}_3$ )  $\delta$  172.2, 155.1, 154.6,

152.6, 135.4, 134.3, 130.0, 128.7, 127.2, 124.9, 121.0, 113.2, 99.0, 61.2, 58.9, 34.4, 30.2, 29.2, 22.2, 18.9, 14.4 ppm. **HRMS (ESI)**  $m/z$  Calcd for  $[C_{31}H_{38}O_4 + H]^+$  475.2843, found 475.2836.

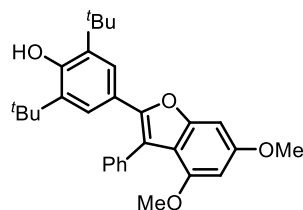

**2,6-di-tert-butyl-4-(4,6-dimethoxy-3-phenylbenzofuran-2-yl)phenol (9ia)** Prepared through general procedure B in 25 min to give **9ia** in 40.3 mg, 44% yield, yellow solid, m.p. 178 – 181 °C,  $R_f$  = 0.7 (PE/EA = 20/1).  **$^1H$  NMR (300 MHz,  $CDCl_3$ )**  $\delta$  7.48 – 7.44 (m, 2H), 7.41 – 7.31 (m, 5H), 6.74 (d,  $J$  = 2.0 Hz, 1H), 6.28 (d,  $J$  = 2.0 Hz, 1H), 5.23 (s, 1H), 3.87 (s, 3H), 3.65 (s, 3H), 1.30 (s, 18H) ppm.  **$^{13}C$  NMR (75 MHz,  $CDCl_3$ )**  $\delta$  158.8, 155.6, 154.7, 153.7, 150.0, 135.7, 134.6, 130.9, 128.1, 127.0, 123.8, 122.3, 115.4, 113.5, 94.5, 88.2, 55.9, 55.6, 34.4, 30.2 ppm. **HRMS (ESI)**  $m/z$  Calcd for  $[C_{30}H_{34}O_4 + H]^+$  459.2530, found 459.2523.

**2,6-di-tert-butyl-4-(5-methyl-3-phenyl-5H-pyrano[4,3,2-cd]indol-2-yl)phenol (9ja)**

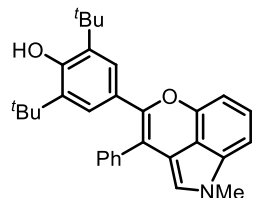

Prepared through general procedure B to give **9ja** in 42.5 mg, 47% yield, yellow oil,  $R_f$  = 0.7 (PE/EA = 20/1).  **$^1H$  NMR (300 MHz,  $CDCl_3$ )**  $\delta$  7.57 – 7.43 (m, 6H), 7.38 – 7.33 (m, 1H), 7.28 – 7.15 (m, 2H), 7.07 (s, 1H), 6.83 (s, 1H), 5.23 (s, 1H), 3.83 (s, 3H), 1.35 (s, 18H) ppm.  **$^{13}C$  NMR (75 MHz,  $CDCl_3$ )**  $\delta$  153.7, 149.5, 147.2, 136.2, 135.9, 134.6, 130.3, 128.9, 128.3, 127.2, 123.8, 122.8, 122.2, 116.7, 114.3, 113.4, 105.6, 97.2, 34.5, 33.6, 30.3 ppm. **HRMS (ESI)**  $m/z$  Calcd for  $[C_{31}H_{33}NO_2 + H]^+$  452.2584, found 452.2583.

**2,6-di-tert-butyl-4-(1-phenylnaphtho[2,1-b]furan-2-yl)phenol (9ka)**

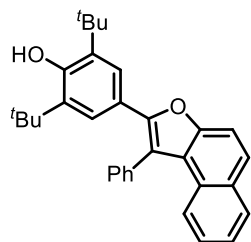

Prepared through general procedure B to give **9ka** in 60.1 mg, 67% yield, m.p. 173 – 174 °C,  $R_f$  = 0.6 (PE/EA = 20/1).  **$^1H$  NMR (300 MHz,  $CDCl_3$ )**  $\delta$  7.90 (d,  $J$  = 8.1 Hz, 1H), 7.76 – 7.69 (m, 2H), 7.57 – 7.46 (m, 8H), 7.36 (t,  $J$  = 7.4 Hz, 1H), 7.26 – 7.21 (m, 1H), 5.27 (s, 1H), 1.32 (s, 18H) ppm.  **$^{13}C$  NMR (75 MHz,  $CDCl_3$ )**  $\delta$  153.9, 151.3, 151.0, 135.9, 135.5, 130.92, 130.87, 129.4, 128.9, 128.2, 128.0, 125.8, 125.0, 124.1, 124.0, 123.5, 123.2, 122.2, 117.5, 112.3, 34.4, 30.1 ppm. **HRMS (ESI)**  $m/z$  Calcd for  $[C_{32}H_{32}O_2 + Na]^+$  471.2295, found 471.2296.

## 8. Gram-scale Reaction for the Synthesis of 9aa

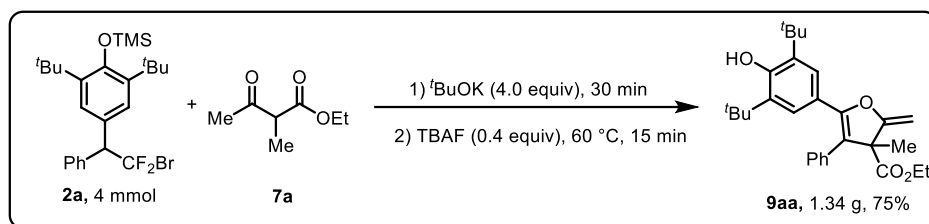

To a 100 mL two necked bottle equipped with a Teflon coated magnetic stir bar was added <sup>t</sup>BuOK (1.79 g, 16.0 mmol, 4.0 equiv) and **7a** (8.0 mmol, 2.0 equiv). Then the bottle was evacuated and filled with argon for three times. After that, anhydrous DCM (10 mL) was added under argon atmosphere via a syringe. The above-mentioned solution was stirred at room temperature for 30 min. Then TBAF (1.6 mL, 1.6 mmol, 1 M in THF) dissolved in 10 mL DCM, and compound **2a** (4.0 mmol in 10 mL DCM) was added in sequential under argon atmosphere. After stirring at 60 °C for 15 min, ice water (15 mL) was slowly added to quench the reaction. The reaction mixture was extracted with DCM (3 × 10 mL). The organic layers were combined and dried over anhydrous MgSO<sub>4</sub>. After removal of the solvent in vacuo, the residue was purified by flash chromatography on silica gel (PE/EA) to afford the corresponding product **9aa** as a white solid (1.34 g, 75% yield).

## 9. One-pot Reaction for the Synthesis of 9aa and 9ka

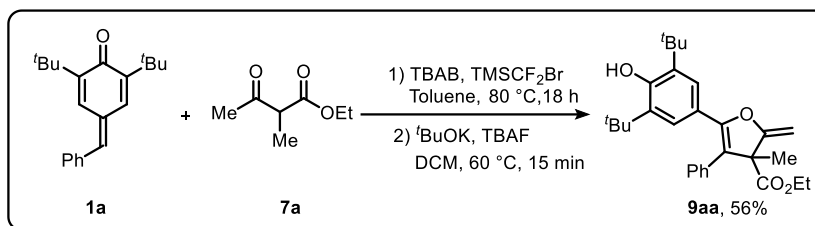

To an oven-dried 10-mL Schlenk tube equipped with a Teflon coated magnetic stir bar was added **1a** (147.2 mg, 0.5 mmol, 1.0 equiv) and TBAB (8.0 mg, 0.025 mmol, 5 mol%), then the Schlenk tube was evacuated and backfilled with argon for three times. After that, TMSCF<sub>2</sub>Br (203.1 mg, 1.0 mmol, 2.0 equiv) dissolved in toluene (1.0 mL) was added under argon atmosphere via a syringe. The reaction mixture was stirred at 80 °C (oil bath) for 18 h to afford the toluene solution of crude intermediate.

To another oven-dried 10-mL Schlenk tube equipped with a Teflon coated magnetic stir bar was added <sup>t</sup>BuOK (224.4 mg, 2.0 mmol, 4.0 equiv), then the Schlenk tube was evacuated and filled with argon for three times. After that, anhydrous DCM (1.0 mL) and **7a** (1.0 mmol, 2.0 equiv, dissolved in 1.0 mL THF) was added under argon atmosphere via a syringe. After stirred at room temperature for 30 min, the toluene solution of crude intermediate was added, and then TBAF (0.5 mmol, 0.4 equiv, 1 M solution in THF) dissolved in 1.0 mL DCM was dropped slowly under argon atmosphere. The reaction mixture was stirred at 60 °C for 15 min. After the starting material was completely consumed, ice water (5 mL) was slowly added to quench the reaction. The reaction mixture was extracted with DCM (3 × 5 mL). The organic layers were combined and dried over anhydrous MgSO<sub>4</sub>. After removal of the solvent in vacuo, the residue was purified by flash chromatography on silica gel (PE/EA) to afford the corresponding product **9aa** as a white solid (125.6 mg, 56% yield).

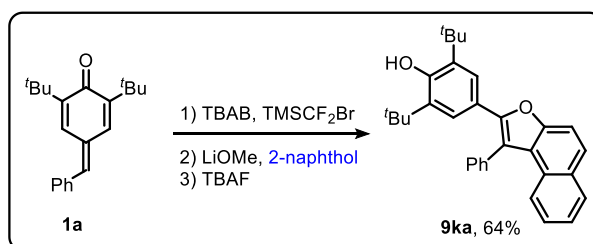

**2,6-di-tert-butyl-4-(1-phenylnaphtho[2,1-b]furan-2-yl)phenol (15)** To an oven-dried 10-mL Schlenk tube equipped with a Teflon coated magnetic stir bar was added *p*-QM **1a** (147.2 mg, 0.5 mmol, 1.0 equiv) and TBAB (8 mg, 0.025 mmol, 5 mol%), then the Schlenk tube was evacuated and filled with argon for three times. After that, TMSCF<sub>2</sub>Br (203.1 mg, 1.0 mmol, 2.0 equiv) dissolved in toluene (1.0 mL) was added under argon atmosphere via a syringe. The reaction mixture was stirred at 80 °C in oil bath for 18 h to afford the toluene solution of crude intermediate. To another oven-dried 10-mL Schlenk tube equipped with a Teflon coated magnetic stir bar was added LiOMe (75.8 mg, 2.0 mmol, 4.0 equiv), then the Schlenk tube was evacuated and filled with argon for three times. After that, anhydrous DCM (0.5 mL) and 2-naphthol (1.0 mmol, 2.0

equiv, dissolved in 0.5 mL DCM) was added under argon atmosphere via a syringe. After stirred for 30 min at room temperature, the toluene solution of crude intermediate was added, and then TBAF (0.2 mmol, 0.4 equiv, dissolved in 1.0 mL DCM) was dropped slowly under argon atmosphere stirred for 15 min at room temperature. When the starting material was completely consumed, saturated solution of  $\text{NH}_4\text{Cl}$  (5 mL) was slowly added to quench the reaction. The reaction mixture was extracted with DCM ( $3 \times 10$  mL). The organic layers were combined and dried over anhydrous  $\text{MgSO}_4$ . After removal of the solvent in vacuo, the residue was purified by flash chromatography on silica gel (PE/EA) to afford the corresponding product **9ka** as a purple solid (143.6 mg, 64% yield).



## 10. Transformations of the Products

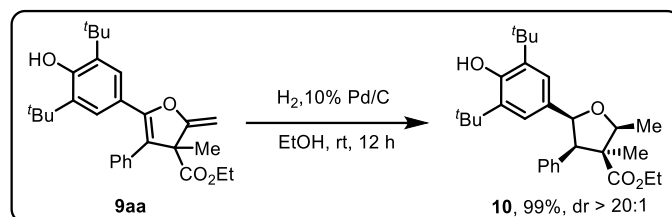

**ethyl** (2*S*,3*S*,4*R*,5*S*)-5-(3,5-di-*tert*-butyl-4-hydroxyphenyl)-2,3-dimethyl-4-phenyltetrahydrofuran-3-carboxylate (**10**) To an oven-dried 50 mL two necked bottle equipped with a Teflon coated magnetic stir bar was added **9aa** (89.7 mg, 0.2 mmol, 1.0 equiv), 10% Pd/C (17.9 mg, 20% wt) and 2 mL EtOH. The bottle was evacuated and filled with H<sub>2</sub> for three times then stirred at room temperature under H<sub>2</sub> atmosphere for 12 h. After **9aa** was completely consumed, the reaction mixture was filtered through a pad of celite and concentrated under reduced pressure. Purification by flash chromatography on silica gel (PE/EA) to afford **10** as a white solid (89.5 mg, 99% yield). **m.p.** 106 – 107 °C, *R<sub>f</sub>* = 0.3 (PE/EA = 20/1). **<sup>1</sup>H NMR (300 MHz, CDCl<sub>3</sub>)** δ 6.92 – 6.84 (m, 3H), 6.77 (s, 2H), 6.57 (d, *J* = 7.3 Hz, 2H), 5.25 (d, *J* = 8.2 Hz, 1H), 4.88 (s, 1H), 3.95 – 3.89 (m, 1H), 3.80 – 3.61 (m, 2H), 3.53 (d, *J* = 8.9 Hz, 1H), 1.47 (d, *J* = 6.5 Hz, 3H), 1.32 (s, 3H), 1.20 (s, 18H), 0.90 (t, *J* = 6.8 Hz, 3H) ppm. **<sup>13</sup>C NMR (75 MHz, CDCl<sub>3</sub>)** δ 172.2, 152.2, 136.9, 134.5, 130.9, 129.7, 127.0, 126.3, 123.7, 83.3, 81.5, 63.5, 59.8, 58.0, 34.2, 30.2, 23.4, 15.3, 14.0 ppm. **HRMS (ESI)** *m/z* Calcd for [C<sub>29</sub>H<sub>40</sub>O<sub>4</sub> + Na]<sup>+</sup> 475.2819, found 475.2834.

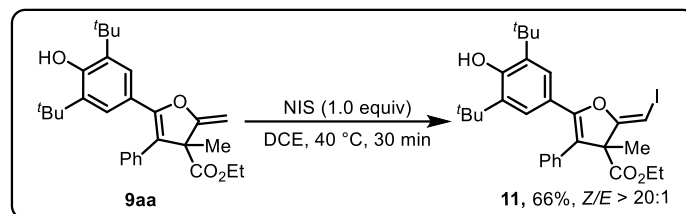

**ethyl** (Z)-5-(3,5-di-*tert*-butyl-4-hydroxyphenyl)-2-(iodomethylene)-3-methyl-4-phenyl-2,3-dihydrofuran-3-carboxylate (**11**) To an oven-dried 10 mL Schlenk tube equipped with a Teflon coated magnetic stir bar was added NIS (45.0 mg, 0.2 mmol, 1.0 equiv) and **9aa** (89.7 mg, 0.2 mmol, 1.0 equiv). Then the Schlenk tube was evacuated and filled with argon for three times. After that, anhydrous DCE (2 mL) was added under argon atmosphere via a syringe under argon atmosphere stirred for 30 min at 40 °C. After **9aa** was completely consumed, the mixture was concentrated and the residue was purified by chromatography on silica gel (PE/EA) to afford **11** as a white solid (75.8 mg, 66% yield, *Z/E* > 20:1). **m.p.** 170 – 172 °C, *R<sub>f</sub>* = 0.4 (PE/EA = 20/1). **<sup>1</sup>H NMR (300 MHz, CDCl<sub>3</sub>)** δ 7.35 – 7.21 (m, 7H), 5.33 (s, 1H), 5.19 (s, 1H), 4.23 – 4.16 (m, 2H), 1.55 (s, 3H), 1.28 – 1.22 (m, 22H) ppm. **<sup>13</sup>C NMR (75 MHz, CDCl<sub>3</sub>)** δ 171.4, 163.9, 154.8, 150.3, 135.6, 133.4, 130.5, 128.9, 127.9, 124.6, 120.1, 115.4, 62.0, 61.0, 44.5, 34.4, 30.1, 23.6, 14.2 ppm. **HRMS (ESI)** *m/z* Calcd for [C<sub>29</sub>H<sub>35</sub>IO<sub>4</sub> + H]<sup>+</sup> 575.1653, found 575.1636.

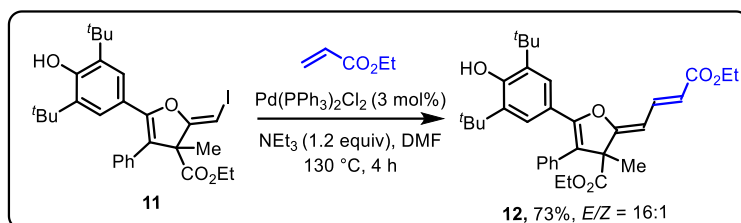

**ethyl (Z)-5-(3,5-di-tert-butyl-4-hydroxyphenyl)-2-((E)-4-ethoxy-4-oxobut-2-en-1-ylidene)-3-methyl-4-phenyl-2,3-dihydrofuran-3-carboxylate (12)** To an oven-dried 10 mL Schlenk tube equipped with a Teflon coated magnetic stir bar was added **11** (114.9 mg, 0.2 mmol, 1.0 equiv) and Pd(PPh<sub>3</sub>)<sub>2</sub>Cl<sub>2</sub> (4.2 mg, 0.006 mmol, 3 mol%). Then the Schlenk tube was evacuated and filled with argon for three times. After that, ethyl acrylate (56.1 mg, 0.56 mmol, 2.8 equiv) and NEt<sub>3</sub> (24.3 mg, 0.24 mmol, 1.2 equiv) in anhydrous DMF (2 ml) was added via a syringe under argon atmosphere. After stirring for 4 h at 130 °C, the reaction mixture was filtered through a pad of celite and concentrated under reduced pressure. Purification by flash chromatography on silica gel (PE/EA) to afford **12** as a white solid (79.6 mg, 73% yield, *E/Z* = 16:1). **m.p.** 167 – 169 °C, *R<sub>f</sub>* = 0.2 (PE/EA = 20/1). <sup>1</sup>H NMR (300 MHz, CDCl<sub>3</sub>) δ 7.86 (dd, *J* = 15.5, 11.3 Hz, 1H), 7.38 – 7.34 (m, 2H), 7.31 (s, 2H), 7.28 – 7.20 (m, 3H), 5.89 (d, *J* = 15.5 Hz, 1H), 5.51 (d, *J* = 11.4 Hz, 1H), 5.38 (s, 1H), 4.28 – 4.18 (m, 4H), 1.59 (s, 3H), 1.35 – 1.23 (m, 6H), 1.31 (s, 18H) ppm. <sup>13</sup>C NMR (75 MHz, CDCl<sub>3</sub>) δ 171.5, 167.6, 165.1, 154.9, 150.6, 138.4, 135.7, 132.9, 130.4, 129.0, 128.0, 124.5, 120.0, 117.6, 114.8, 98.8, 62.0, 61.1, 60.2, 34.4, 30.1, 23.1, 14.4, 14.2 ppm. HRMS (ESI) *m/z* Calcd for [C<sub>34</sub>H<sub>42</sub>O<sub>6</sub> + H]<sup>+</sup> 547.3055, found 547.3058.

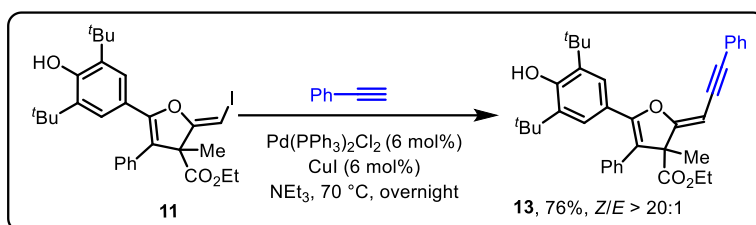

**ethyl (Z)-5-(3,5-di-tert-butyl-4-hydroxyphenyl)-3-methyl-4-phenyl-2-(3-phenylprop-2-yn-1-ylidene)-2,3-dihydrofuran-3-carboxylate (13)** To an oven-dried 10 mL Schlenk tube equipped with a Teflon coated magnetic stir bar was added **11** (114.9 mg, 0.2 mmol, 1.0 equiv), Pd(PPh<sub>3</sub>)<sub>2</sub>Cl<sub>2</sub> (8.4 mg, 0.012 mmol, 6 mol%), and CuI (2.3 mg, 0.012 mmol, 6 mol%). Then the Schlenk tube was evacuated and filled with argon for three times. After that, phenylacetylene (24.5 mg, 0.24 mmol, 1.2 equiv) in anhydrous NEt<sub>3</sub> (2 mL) was added via a syringe under argon atmosphere. After stirring at 70 °C overnight, the reaction mixture was filtered through a pad of celite and concentrated under reduced pressure. Purification by flash chromatography on silica gel (PE/EA) to afford **13** as a white solid (83.4 mg, 76% yield, *Z/E* > 20:1). **m.p.** 142– 144 °C, *R<sub>f</sub>* = 0.3 (PE/EA = 20/1). <sup>1</sup>H NMR (300 MHz, CDCl<sub>3</sub>) δ 7.49 – 7.46 (m, 2H), 7.39 – 7.23 (m, 10H), 5.33 (s, 1H), 5.04 (s, 1H), 4.29 – 4.15 (m, 2H), 1.58 (s, 3H), 1.30 – 1.23 (m, 21H) ppm. <sup>13</sup>C NMR (75 MHz, CDCl<sub>3</sub>) δ 171.6, 168.3, 154.8, 150.6, 135.6, 133.2, 131.3, 130.5, 129.0, 128.4, 128.0, 127.8, 124.6, 124.3, 120.2, 114.8, 94.5, 84.3, 80.8, 62.0, 61.0, 34.4, 30.1,

23.6, 14.3 ppm. **HRMS (ESI)**  $m/z$  Calcd for  $[C_{37}H_{41}O_4 + H]^+$  549.3000, found 549.2991.

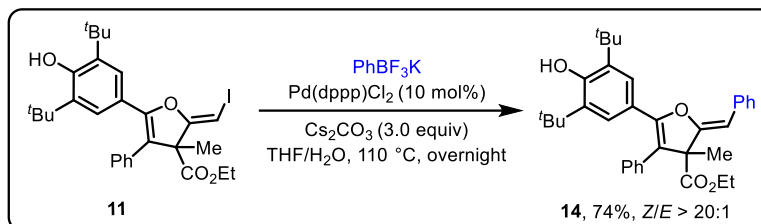

**ethyl (Z)-2-benzylidene-5-(3-(tert-butyl)-4-hydroxy-5-methylphenyl)-3-methyl-4-phenyl-2,3-dihydrofuran-3-carboxylate (14)** To an oven-dried 10 mL Schlenk tube equipped with a Teflon coated magnetic stir bar was added **11** (114.9 mg, 0.2 mmol, 1.0 equiv),  $Cs_2CO_3$  (211.7 mg, 0.6 mmol, 3.0 equiv),  $PhBF_3K$  (44.2 mg, 0.24 mmol, 1.2 equiv), and  $Pd(dppp)Cl_2$  (11.8 mg, 0.02 mmol, 10 mol%). Then the Schlenk tube was evacuated and filled with argon for three times. After that, THF (2.0 mL) and  $H_2O$  (0.6 mL) were added under argon atmosphere via a syringe. After stirred at 110 °C overnight, the reaction was quenched with brine and extracted with EA ( $3 \times 4$  mL). The combined organic phase was washed with brine, dried over  $MgSO_4$ , evaporated to give the crude products. The residue was purified by flash chromatography (PE/EA) to afford **14** as a yellow solid (77.7 mg, 74% yield,  $Z/E > 20:1$ ). **m.p.** 163 – 165 °C,  $R_f = 0.3$  (PE/EA = 20/1).  **$^1H$  NMR (300 MHz,  $CDCl_3$ )**  $\delta$  7.76 – 7.73 (m, 2H), 7.38 – 7.16 (m, 10H), 5.58 (s, 1H), 5.33 (s, 1H), 4.29 – 4.11 (m, 2H), 1.62 (s, 3H), 1.30 (s, 18H), 1.23 (t,  $J = 7.1$  Hz, 3H) ppm.  **$^{13}C$  NMR (75 MHz,  $CDCl_3$ )**  $\delta$  172.5, 158.3, 154.7, 150.6, 135.7, 133.5, 130.6, 128.9, 128.4, 128.3, 127.8, 126.0, 124.5, 120.6, 114.3, 100.5, 61.8, 61.5, 34.4, 30.1, 23.8, 14.3 ppm. **HRMS (ESI)**  $m/z$  Calcd for  $[C_{35}H_{40}O_4 + H]^+$  525.3000, found 525.2998.

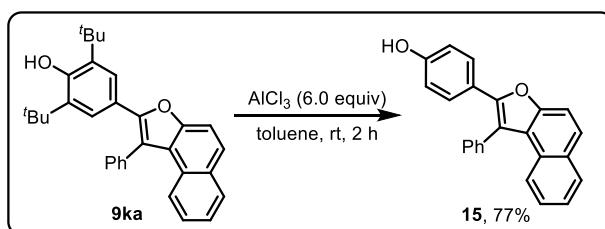

**4-(1-phenylnaphtho[2,1-b]furan-2-yl)phenol (15)** To an oven dried 10 mL Schlenk tube equipped with a Teflon coated magnetic stir bar was added  $AlCl_3$  (160.0 mg, 1.2 mmol, 6.0 equiv). Then the Schlenk tube was evacuated and filled with argon for three times. After that, **9ka** (89.7 mg, 0.2 mmol, 1.0 equiv) dissolved in toluene (4.0 mL) was added. The reaction was stirred for 2 h under at room temperature. After complete consumption of **9ka**, ice-water was added to quench the reaction. The reaction mixture was extracted with EA ( $3 \times 10$  mL). The organic layers were combined and dried over anhydrous  $MgSO_4$ , filtered, and concentrated in vacuo. The residue was purified by flash chromatography on silica gel (PE/EA) to afford product **15** as yellow oil (51.8 mg, 77% yield),  $R_f = 0.3$  (PE/EA = 5/1).  **$^1H$  NMR (300 MHz,  $CDCl_3$ )**  $\delta$  7.85 (d,  $J = 7.7$  Hz, 1H), 7.65 (app. s, 2H), 7.54 – 7.48 (m, 6H), 7.41 – 7.30 (m, 3H), 7.24 – 7.19 (m, 1H),

6.65 (d,  $J = 8.7$  Hz, 2H), 5.52 (s, 1H) ppm.  $^{13}\text{C}$  NMR (75 MHz,  $\text{CDCl}_3$ )  $\delta$  155.3, 151.2, 150.3, 134.9, 131.0, 130.8, 129.5, 129.1, 128.4, 128.2, 128.0, 126.0, 125.6, 124.3, 124.0, 123.8, 123.2, 118.1, 115.6, 112.3 ppm. HRMS (ESI)  $m/z$  Calcd for  $[\text{C}_{24}\text{H}_{16}\text{O}_2 + \text{H}]^+$  337.1223, found 337.1225.

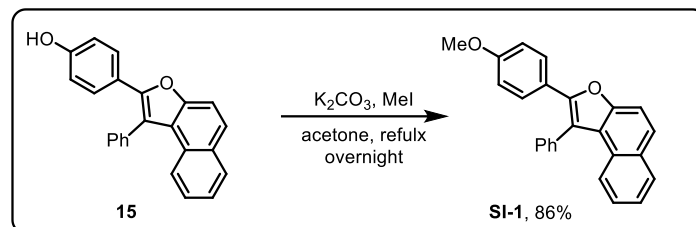

**2-(4-methoxyphenyl)-1-phenylnaphtho[2,1-b]furan (SI-1)** To an oven-dried 10 mL Schlenk tube equipped with a Teflon coated magnetic stir bar was added **15** (67.3 mg, 0.2 mmol, 1.0 equiv) and  $\text{K}_2\text{CO}_3$  (138.2 mg, 1.0 mmol, 5.0 equiv). Then the Schlenk tube was evacuated and filled with argon for three times. After that, MeI (56.8 mg, 0.4 mmol, 2.0 equiv) dissolved in acetone (2 mL) was added under argon atmosphere via a syringe under argon atmosphere stirred at 70 °C overnight. When the starting material was completely consumed, water was slowly added to quench the reaction. The reaction mixture was extracted with EA ( $3 \times 10$  mL). The organic layers were combined and dried over anhydrous  $\text{MgSO}_4$ . After removal of the solvent in vacuo, the residue was purified by flash chromatography on silica gel (PE/EA) to afford **SI-1** as a white solid (60.1 mg, 86% yield). **m.p.** 110 – 111 °C,  $R_f = 0.4$  (PE/EA = 5/1).  $^1\text{H}$  NMR (300 MHz,  $\text{CDCl}_3$ )  $\delta$  7.88 (d,  $J = 8.1$  Hz, 1H), 7.68 (s, 2H), 7.56 – 7.44 (m, 8H), 7.38 – 7.32 (m, 1H), 7.25 – 7.18 (m, 1H), 6.80 – 6.75 (m, 2H), 3.73 (s, 3H) ppm.  $^{13}\text{C}$  NMR (75 MHz,  $\text{CDCl}_3$ )  $\delta$  159.4, 151.2, 150.4, 135.0, 131.0, 130.9, 130.8, 129.6, 129.5, 129.5, 129.0, 128.3, 128.2, 127.8, 127.7, 125.9, 125.5, 124.3, 123.8, 123.7, 123.2, 118.1, 114.0, 112.2, 55.3 ppm. HRMS (ESI)  $m/z$  Calcd for  $[\text{C}_{25}\text{H}_{18}\text{O}_2 + \text{H}]^+$  351.1380, found 351.1379. Product **SI-1** is a known compound. The regioselectivity in forming **9ka** was unambiguously established by NMR spectral congruence with reported data.<sup>[2]</sup>

## 11. Control Experiments

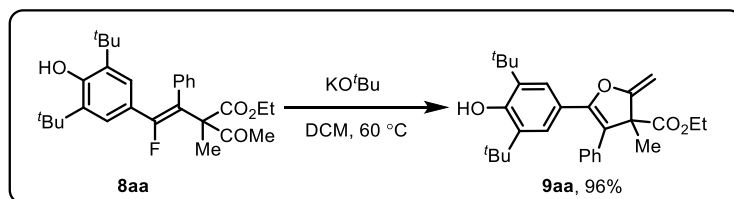

To an oven-dried 10 mL Schlenk tube equipped with a Teflon coated magnetic stir bar was added *t*BuOK (89.8 mg, 0.8 mmol, 4.0 equiv) and **8aa** (99.7 mg, 0.2 mmol, 1.0 equiv) then the Schlenk tube was evacuated and filled with argon for three times. After that, anhydrous DCM (2 mL) was added under argon atmosphere via a syringe under argon atmosphere stirred for 15 min at 60 °C. After the starting material was completely consumed, ice water (5 mL) was slowly added to quench the reaction. The reaction mixture was extracted with DCM (3 × 10 mL). The organic layers were combined and dried over anhydrous MgSO<sub>4</sub>. After removal of the solvent in vacuo, the residue was purified by flash chromatography on silica gel (PE/EA) to afford the corresponding product **9aa** as a white solid (86.0 mg, 96% yield).

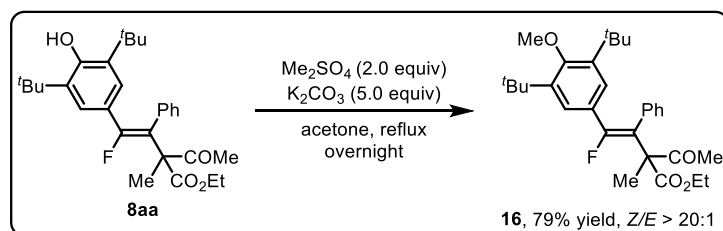

To an oven-dried 10 mL Schlenk tube equipped with a Teflon coated magnetic stir bar was added **8aa** (93.7 mg, 0.2 mmol, 1.0 equiv) and K<sub>2</sub>CO<sub>3</sub> (138.2 mg, 1.0 mmol, 5.0 equiv). Then the Schlenk tube was evacuated and filled with argon for three times. After that, Me<sub>2</sub>SO<sub>4</sub> (50.5 mg, 0.4 mmol, 2.0 equiv) dissolved in acetone (2 mL) was added under argon atmosphere via a syringe under argon atmosphere stirred at 70 °C overnight. When the starting material was completely consumed, water was slowly added to quench the reaction. The reaction mixture was extracted with EA (3 × 10 mL). The organic layers were combined and dried over anhydrous MgSO<sub>4</sub>. After removal of the solvent in vacuo, the residue was purified by flash chromatography on silica gel (PE/EA) to afford **16** as a white solid (76.2 mg, 79% yield, Z/E > 20:1). **m.p.** 131 – 133 °C, *R*<sub>f</sub> = 0.6 (PE/EA = 10/1). **<sup>1</sup>H NMR (300 MHz, CDCl<sub>3</sub>)** δ 7.37 – 7.24 (m, 3H), 7.19 – 7.16 (m, 2H), 7.01 (s, 2H), 4.10 – 3.98 (m, 2H), 3.60 (s, 3H), 2.48 (d, *J* = 1.9 Hz, 3H), 1.48 (s, 3H), 1.20 (s, 19H), 1.14 (t, *J* = 7.1 Hz, 3H) ppm. **<sup>13</sup>C NMR (75 MHz, CDCl<sub>3</sub>)** δ 204.7 (d, <sup>4</sup>*J* = 2.3 Hz), 171.4, 160.1, 156.1 (d, <sup>1</sup>*J* = 250.1 Hz), 143.2, 136.1 (d, <sup>3</sup>*J* = 8.6 Hz), 130.4 (d, <sup>4</sup>*J* = 3.0 Hz), 128.9, 128.0, 126.6 (d, <sup>3</sup>*J* = 7.5 Hz), 125.7 (d, <sup>2</sup>*J* = 28.0 Hz), 119.2 (d, <sup>2</sup>*J* = 19.4 Hz), 64.2, 64.0, 61.6, 35.7, 31.8, 27.3 (d, <sup>4</sup>*J* = 4.6 Hz), 20.9 (d, <sup>4</sup>*J* = 1.6 Hz), 13.9 ppm. **<sup>19</sup>F NMR (282 MHz, CDCl<sub>3</sub>)** δ -96.3 ppm. **HRMS (ESI)** *m/z* Calcd for [C<sub>30</sub>H<sub>39</sub>FO<sub>4</sub> + Na]<sup>+</sup> 505.2725, found 505.2727.

## 12. Calculation Studies

To validate bond order quantification, semi-empirical quantum mechanical (QM) calculations were performed using the PM7 Hamiltonian as implemented in MOPAC v22.1.1 (Digital Object Identifier (DOI): 10.5281/zenodo.6511958). Initial molecular geometries were defined through Cartesian coordinates, with explicit generation of Mayer bond order matrices enabled by the BONDS keyword. All geometry optimizations were conducted under gas-phase conditions to simulate isolated molecular environments.

The computational results are presented as follows.

### Intermediate I (INT-I)

|   |             |             |             |
|---|-------------|-------------|-------------|
| C | -0.00000038 | 0.01144502  | 0.00234211  |
| C | 2.09269800  | 1.21919308  | -0.00000046 |
| C | 1.39504438  | 2.42769771  | -0.00354261 |
| C | 0.00021938  | 2.42761922  | -0.00402101 |
| C | -0.69738200 | 1.21941765  | -0.00068200 |
| H | -0.54975692 | -0.94087567 | 0.00044960  |
| H | 3.19237342  | 1.21927944  | 0.00482213  |
| O | -0.71509425 | 3.66584907  | -0.00766095 |
| C | -2.23738196 | 1.21967394  | -0.00093409 |
| C | -2.71308564 | 1.94172337  | 1.24194665  |
| C | -2.71281788 | 1.93482693  | -1.24784514 |
| C | -2.71316312 | -0.21766301 | 0.00296366  |
| H | -2.33913584 | 1.42529621  | 2.15841942  |
| H | -2.33838435 | 2.99339448  | 1.24774255  |
| H | -3.82888196 | 1.96398262  | 1.27935692  |
| H | -2.33823551 | 1.41374577  | -2.16142981 |
| H | -3.82862522 | 1.95635430  | -1.28582080 |
| H | -2.33862626 | 2.98664312  | -1.25922127 |
| H | -3.82899581 | -0.26104966 | 0.00346840  |
| H | -2.33912787 | -0.75323909 | -0.90241572 |
| H | -2.33860715 | -0.74847827 | 0.91093958  |
| C | 2.16554888  | 3.76108276  | -0.00621100 |
| C | 1.78218598  | 4.52943596  | -1.25323472 |
| C | 1.78066425  | 4.53545807  | 1.23655888  |
| C | 3.64804661  | 3.45364488  | -0.00452897 |
| H | 2.04483861  | 3.94366483  | -2.16665881 |
| H | 0.68419383  | 4.73133546  | -1.26306274 |
| H | 2.32145066  | 5.50643129  | -1.29286009 |
| H | 2.04162095  | 3.95394379  | 2.15319252  |
| H | 2.32034527  | 5.51239051  | 1.27232182  |
| H | 0.68275082  | 4.73793835  | 1.24390106  |
| H | 4.24405320  | 4.39796238  | -0.00695329 |

|   |            |             |             |
|---|------------|-------------|-------------|
| H | 3.92185032 | 2.86531815  | 0.90396380  |
| H | 3.92282722 | 2.86018141  | -0.90939029 |
| C | 1.39515962 | 0.01144458  | 0.00234166  |
| C | 2.04664035 | -1.11490464 | -0.74616120 |
| C | 2.04411989 | -1.11357837 | 0.75493997  |
| H | 1.41112866 | -1.84072875 | -1.28314242 |
| F | 1.26471187 | -1.99969824 | 1.41054253  |
| F | 3.19997999 | -0.88184161 | 1.41280433  |
| C | 3.36779261 | -0.85214179 | -1.49256083 |
| C | 3.34534058 | -0.38612883 | -2.80739894 |
| C | 4.58683438 | -1.07991601 | -0.85412194 |
| C | 4.54170803 | -0.14861393 | -3.48379625 |
| H | 2.38410696 | -0.20738771 | -3.31071129 |
| C | 5.78365748 | -0.84143958 | -1.53025310 |
| H | 4.60471337 | -1.44703666 | 0.18223311  |
| C | 5.76128801 | -0.37598971 | -2.84493673 |
| H | 4.52409000 | 0.21810517  | -4.52037872 |
| H | 6.74466839 | -1.02072786 | -1.02647937 |
| H | 6.70445212 | -0.18859034 | -3.37843392 |

#### Atomic orbital electron populations

|    | Atom | s       | px      | py      | pz      |
|----|------|---------|---------|---------|---------|
| 1  | C    | 1.08707 | 0.96466 | 1.08074 | 1.00091 |
| 2  | C    | 1.08926 | 1.09612 | 0.95474 | 0.98780 |
| 3  | C    | 1.10260 | 1.00651 | 1.01235 | 1.00362 |
| 4  | C    | 1.11508 | 0.88846 | 0.85767 | 0.67963 |
| 5  | C    | 1.10414 | 1.02353 | 0.99565 | 0.99395 |
| 6  | H    | 0.83158 |         |         |         |
| 7  | H    | 0.82287 |         |         |         |
| 8  | O    | 1.87871 | 1.72964 | 1.44210 | 1.39942 |
| 9  | C    | 1.04659 | 0.90773 | 0.94832 | 0.96041 |
| 10 | C    | 1.05918 | 1.15276 | 1.16978 | 1.08133 |
| 11 | C    | 1.05962 | 1.16652 | 1.16255 | 1.07665 |
| 12 | C    | 1.06070 | 1.16325 | 1.07476 | 1.16955 |
| 13 | H    | 0.85437 |         |         |         |
| 14 | H    | 0.82835 |         |         |         |
| 15 | H    | 0.85560 |         |         |         |
| 16 | H    | 0.85728 |         |         |         |
| 17 | H    | 0.85486 |         |         |         |
| 18 | H    | 0.83095 |         |         |         |
| 19 | H    | 0.85134 |         |         |         |
| 20 | H    | 0.85607 |         |         |         |
| 21 | H    | 0.85324 |         |         |         |
| 22 | C    | 1.04624 | 0.93256 | 0.92071 | 0.95805 |

|    |   |         |         |         |         |
|----|---|---------|---------|---------|---------|
| 23 | C | 1.05931 | 1.18351 | 1.14378 | 1.07665 |
| 24 | C | 1.05913 | 1.19082 | 1.13089 | 1.08159 |
| 25 | C | 1.06070 | 1.05379 | 1.18125 | 1.17265 |
| 26 | H | 0.85797 |         |         |         |
| 27 | H | 0.83354 |         |         |         |
| 28 | H | 0.85520 |         |         |         |
| 29 | H | 0.85400 |         |         |         |
| 30 | H | 0.85646 |         |         |         |
| 31 | H | 0.83012 |         |         |         |
| 32 | H | 0.85045 |         |         |         |
| 33 | H | 0.85225 |         |         |         |
| 34 | H | 0.85520 |         |         |         |
| 35 | C | 1.04935 | 0.99300 | 0.95344 | 1.08859 |
| 36 | C | 1.06769 | 1.07998 | 1.07754 | 0.99898 |
| 37 | C | 1.09675 | 0.80899 | 0.90580 | 0.85537 |
| 38 | H | 0.80461 |         |         |         |
| 39 | F | 1.96710 | 1.78153 | 1.65448 | 1.75621 |
| 40 | F | 1.96685 | 1.47258 | 1.95075 | 1.76152 |
| 41 | C | 1.05723 | 0.95407 | 1.00333 | 0.98701 |
| 42 | C | 1.08491 | 1.06116 | 1.01514 | 0.99000 |
| 43 | C | 1.08449 | 0.98300 | 1.03620 | 1.04892 |
| 44 | C | 1.08358 | 0.98641 | 1.03225 | 1.04186 |
| 45 | H | 0.83705 |         |         |         |
| 46 | C | 1.08364 | 1.05291 | 1.01249 | 0.99173 |
| 47 | H | 0.83993 |         |         |         |
| 48 | C | 1.08420 | 1.04809 | 0.99484 | 1.01933 |
| 49 | H | 0.84830 |         |         |         |
| 50 | H | 0.84878 |         |         |         |
| 51 | H | 0.85065 |         |         |         |

**(Valencies)    bond orders**

|       |         |       |       |       |       |     |       |     |
|-------|---------|-------|-------|-------|-------|-----|-------|-----|
| 1 C   | (3.968) | 5 C   | 1.883 | 35 C  | 1.025 | 6 H | 0.953 | 8 O |
| 0.037 | 4 C     | 0.013 | 10 C  | 0.013 |       |     |       |     |
|       |         |       | 11 C  | 0.012 |       |     |       |     |
|       |         |       |       |       |       |     |       |     |
| 2 C   | (3.965) | 3 C   | 1.881 | 35 C  | 1.025 | 7 H | 0.950 | 8 O |
| 0.038 | 4 C     | 0.014 | 24 C  | 0.013 |       |     |       |     |
|       |         |       | 23 C  | 0.012 |       |     |       |     |
|       |         |       |       |       |       |     |       |     |
| 3 C   | (3.984) | 2 C   | 1.881 | 22 C  | 0.985 | 4 C | 0.976 | 8 O |
| 0.048 | 36 C    | 0.019 | 5 C   | 0.019 |       |     |       |     |
|       |         |       | 37 C  | 0.017 |       |     |       |     |



|               |                       |                                      |            |            |      |
|---------------|-----------------------|--------------------------------------|------------|------------|------|
| 4 C<br>0.014  | (3.836)<br>1 C 0.013  | 8 O 1.819                            | 3 C 0.976  | 5 C 0.972  | 2 C  |
| 5 C<br>0.048  | (3.985)<br>36 C 0.019 | 1 C 1.883<br>3 C 0.019<br>37 C 0.017 | 9 C 0.986  | 4 C 0.972  | 8 O  |
| 6 H           | (0.972)               | 1 C 0.953                            |            |            |      |
| 7 H           | (0.969)               | 2 C 0.950                            |            |            |      |
| 8 O<br>0.038  | (2.015)<br>1 C 0.037  | 4 C 1.819                            | 5 C 0.048  | 3 C 0.048  | 2 C  |
| 9 C<br>0.986  | (3.984)               | 12 C 0.994                           | 10 C 0.990 | 11 C 0.990 | 5 C  |
| 10 C<br>0.960 | (3.924)<br>1 C 0.013  | 9 C 0.990                            | 13 H 0.971 | 15 H 0.970 | 14 H |
| 11 C<br>0.961 | (3.925)<br>1 C 0.012  | 9 C 0.990                            | 16 H 0.972 | 17 H 0.970 | 18 H |
| 12 C<br>0.968 | (3.930)               | 9 C 0.994                            | 20 H 0.971 | 21 H 0.970 | 19 H |
| 13 H          | (0.979)               | 10 C 0.971                           |            |            |      |
| 14 H          | (0.971)               | 10 C 0.960                           |            |            |      |
| 15 H          | (0.979)               | 10 C 0.970                           |            |            |      |
| 16 H          | (0.980)               | 11 C 0.972                           |            |            |      |
| 17 H          | (0.979)               | 11 C 0.970                           |            |            |      |
| 18 H          | (0.971)               | 11 C 0.961                           |            |            |      |
| 19 H          | (0.978)               | 12 C 0.968                           |            |            |      |
| 20 H          | (0.979)               | 12 C 0.971                           |            |            |      |
| 21 H          | (0.978)               | 12 C 0.970                           |            |            |      |

|               |                       |                                       |                         |            |       |
|---------------|-----------------------|---------------------------------------|-------------------------|------------|-------|
| 22 C<br>0.985 | (3.983)               | 25 C 0.995                            | 23 C 0.990              | 24 C 0.990 | 3 C C |
| 23 C<br>0.962 | (3.926)<br>2 C 0.012  | 22 C 0.990                            | 26 H 0.972              | 28 H 0.970 | 27 H  |
| 24 C<br>0.961 | (3.925)<br>2 C 0.013  | 22 C 0.990                            | 29 H 0.971              | 30 H 0.970 | 31 H  |
| 25 C<br>0.968 | (3.929)               | 22 C 0.995                            | 34 H 0.970              | 33 H 0.969 | 32 H  |
| 26 H          | (0.980)               | 23 C 0.972                            |                         |            |       |
| 27 H          | (0.972)               | 23 C 0.962                            |                         |            |       |
| 28 H          | (0.979)               | 23 C 0.970                            |                         |            |       |
| 29 H          | (0.979)               | 24 C 0.971                            |                         |            |       |
| 30 H          | (0.979)               | 24 C 0.970                            |                         |            |       |
| 31 H          | (0.971)               | 24 C 0.961                            |                         |            |       |
| 32 H          | (0.978)               | 25 C 0.968                            |                         |            |       |
| 33 H          | (0.978)               | 25 C 0.969                            |                         |            |       |
| 34 H          | (0.979)               | 25 C 0.970                            |                         |            |       |
| 35 C<br>0.913 | (3.977)<br>39 F 0.022 | 1 C 1.025<br>40 F 0.021               | 2 C 1.025               | 37 C 0.924 | 36 C  |
| 36 C<br>0.913 | (3.949)<br>39 F 0.022 | 41 C 1.005<br>40 F 0.022<br>5 C 0.019 | 37 C 0.973<br>3 C 0.019 | 38 H 0.940 | 35 C  |
| 37 C<br>0.924 | (3.884)<br>3 C 0.017  | 36 C 0.973<br>5 C 0.017               | 40 F 0.966              | 39 F 0.959 | 35 C  |
| 38 H          | (0.962)               | 36 C 0.940                            |                         |            |       |
| 39 F<br>0.022 | (1.054)               | 37 C 0.959                            | 40 F 0.039              | 36 C 0.022 | 35 C  |

|               |         |            |            |            |      |
|---------------|---------|------------|------------|------------|------|
| 40 F<br>0.021 | (1.059) | 37 C 0.966 | 39 F 0.039 | 36 C 0.022 | 35 C |
| 41 C<br>0.114 | (3.992) | 43 C 1.430 | 42 C 1.415 | 36 C 1.005 | 48 C |
| 42 C<br>0.112 | (3.973) | 44 C 1.452 | 41 C 1.415 | 45 H 0.960 | 46 C |
| 43 C<br>0.111 | (3.974) | 46 C 1.439 | 41 C 1.430 | 47 H 0.961 | 44 C |
| 44 C<br>0.111 | (3.976) | 42 C 1.452 | 48 C 1.434 | 49 H 0.964 | 43 C |
| 45 H          | (0.973) | 42 C 0.960 |            |            |      |
| 46 C<br>0.112 | (3.976) | 48 C 1.446 | 43 C 1.439 | 50 H 0.964 | 42 C |
| 47 H          | (0.974) | 43 C 0.961 |            |            |      |
| 48 C<br>0.114 | (3.977) | 46 C 1.446 | 44 C 1.434 | 51 H 0.965 | 41 C |
| 49 H          | (0.977) | 44 C 0.964 |            |            |      |
| 50 H          | (0.977) | 46 C 0.964 |            |            |      |
| 51 H          | (0.978) | 48 C 0.965 |            |            |      |

### 13. Crystal Structure of Product 10

Vapor diffusion crystallization method was used for crystal growth of **10**. The compound **10** was dissolved in diethyl ether to make saturated solution in small vial and placed in closed bottle with another solvent as *n*-hexane.

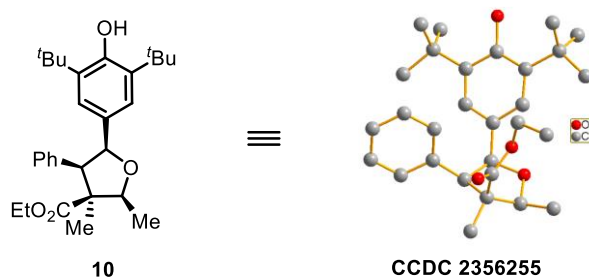

**Figure S1.** ORTEP plot of the crystal structure of compound **10** and thermal ellipsoid is set at 50% probability

**Table S3** X-ray Crystallographic Data of **10**

|                                        |                                                                                                   |
|----------------------------------------|---------------------------------------------------------------------------------------------------|
| CCDC number                            | 2356255                                                                                           |
| Bond precision                         | C-C = 0.0050 Å Wavelength = 0.71073                                                               |
| Cell                                   | a=10.6394 (6) b=10.7112 (6) c=23.9695 (13)<br>alpha=90.188 (2) beta=102.380 (2) gamma=104.147 (2) |
| Temperature                            | 170 K                                                                                             |
| Volume                                 | 2582.7 (3)                                                                                        |
| Space group                            | P -1                                                                                              |
| Hall group                             | -P 1                                                                                              |
| Sum formula                            | C <sub>29</sub> H <sub>40</sub> O <sub>4</sub>                                                    |
| Mr                                     | 452.61                                                                                            |
| Dx, g cm <sup>-3</sup>                 | 1.164                                                                                             |
| Z                                      | 4                                                                                                 |
| Mu (mm <sup>-1</sup> )                 | 0.076                                                                                             |
| F000                                   | 984.0                                                                                             |
| F000'                                  | 984.44                                                                                            |
| h, k, lmax                             | 0, 0, 0                                                                                           |
| Nref                                   | 10326                                                                                             |
| Tmin, Tmax                             | 0.524, 0.856                                                                                      |
| Tmin'                                  | 0.989                                                                                             |
| Correction method                      | # Reported T Limits: Tmin=0.524, Tmax=0.856                                                       |
| AbsCorr                                | MULTI-SCAN                                                                                        |
| Data completeness                      | 0.971                                                                                             |
| Theta(max)                             | 26.423                                                                                            |
| R(reflections)                         | 0.0866 (6371)                                                                                     |
| wR2(reflections)                       | wR2 (reflections) =0.2458 (10326)                                                                 |
| S                                      | 1.049                                                                                             |
| Npar                                   | 615                                                                                               |
| Ellipsoid contour % probability levels | 50                                                                                                |

## 14. $^1\text{H}$ , $^{13}\text{C}$ and $^{19}\text{F}$ NMR Spectra of Title Compounds

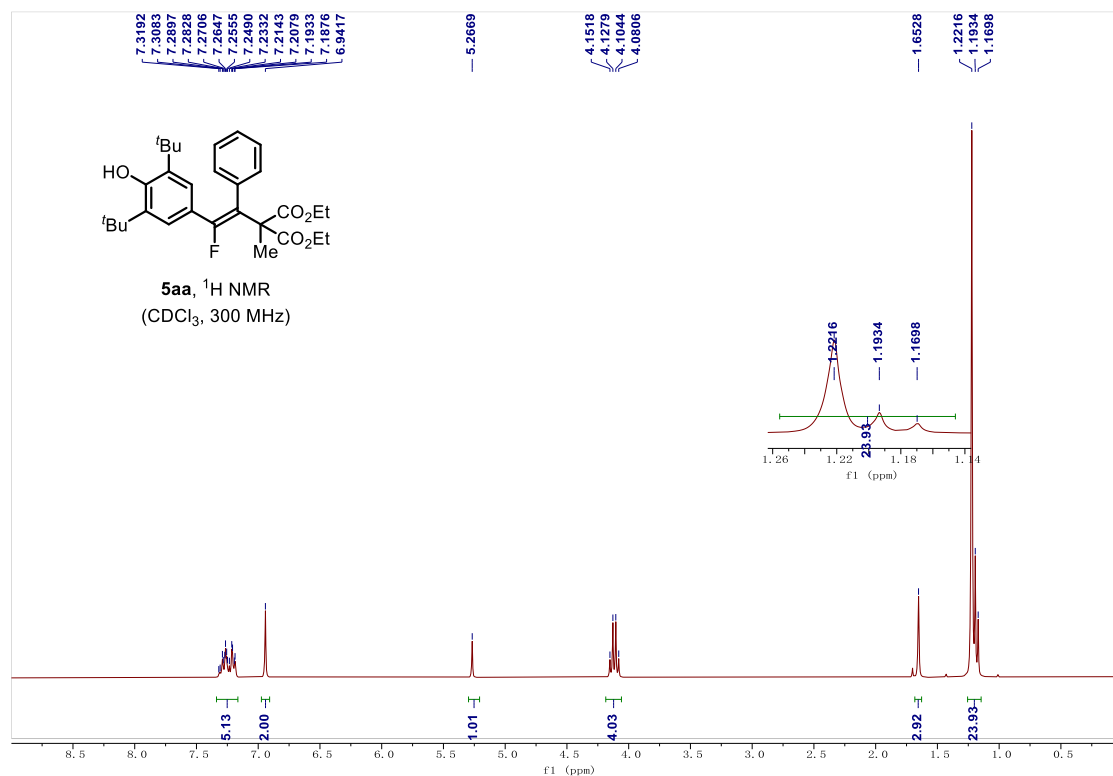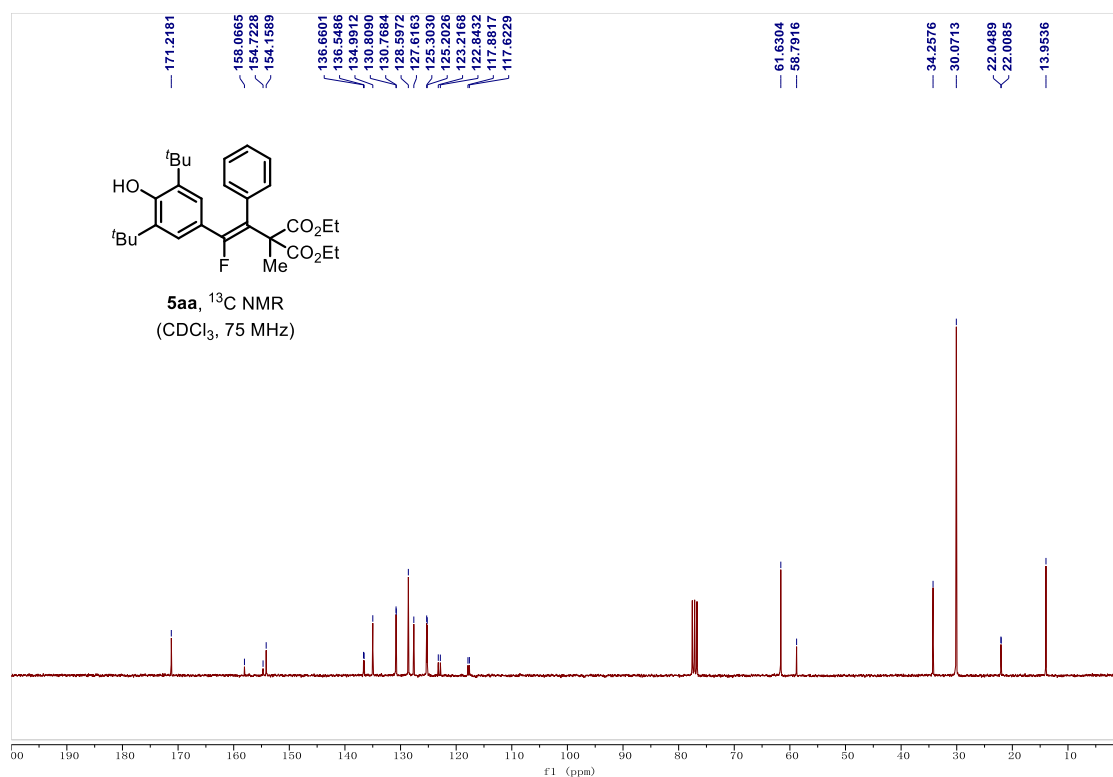

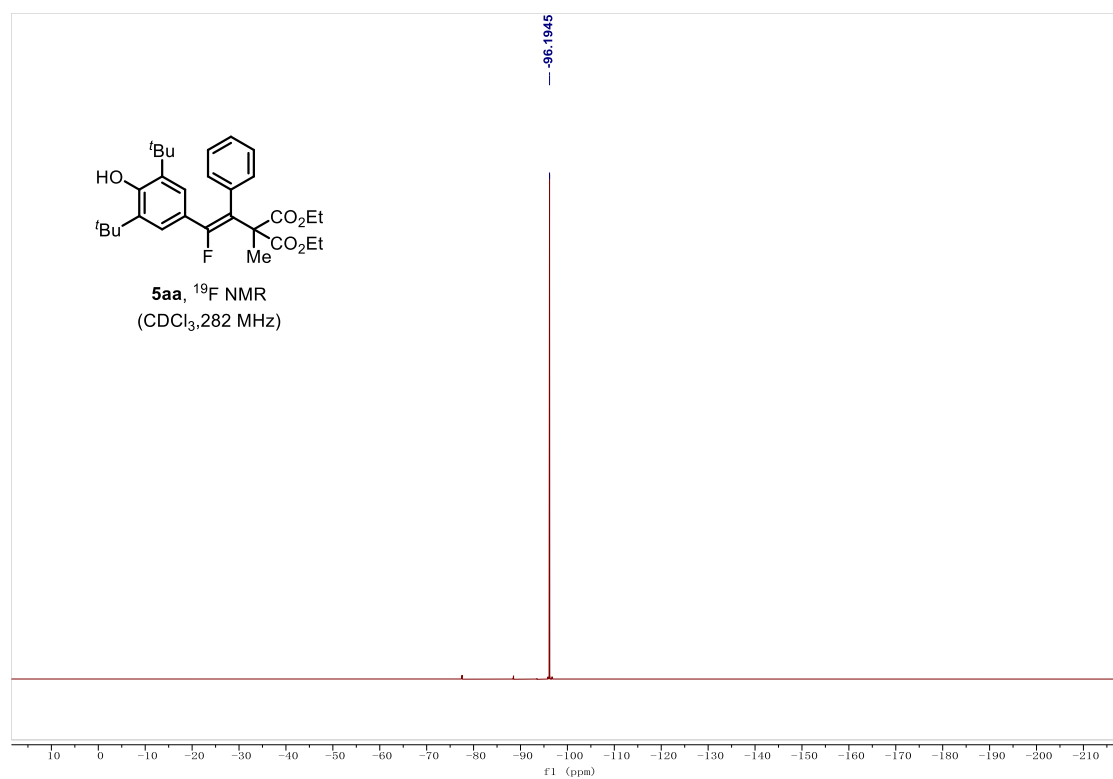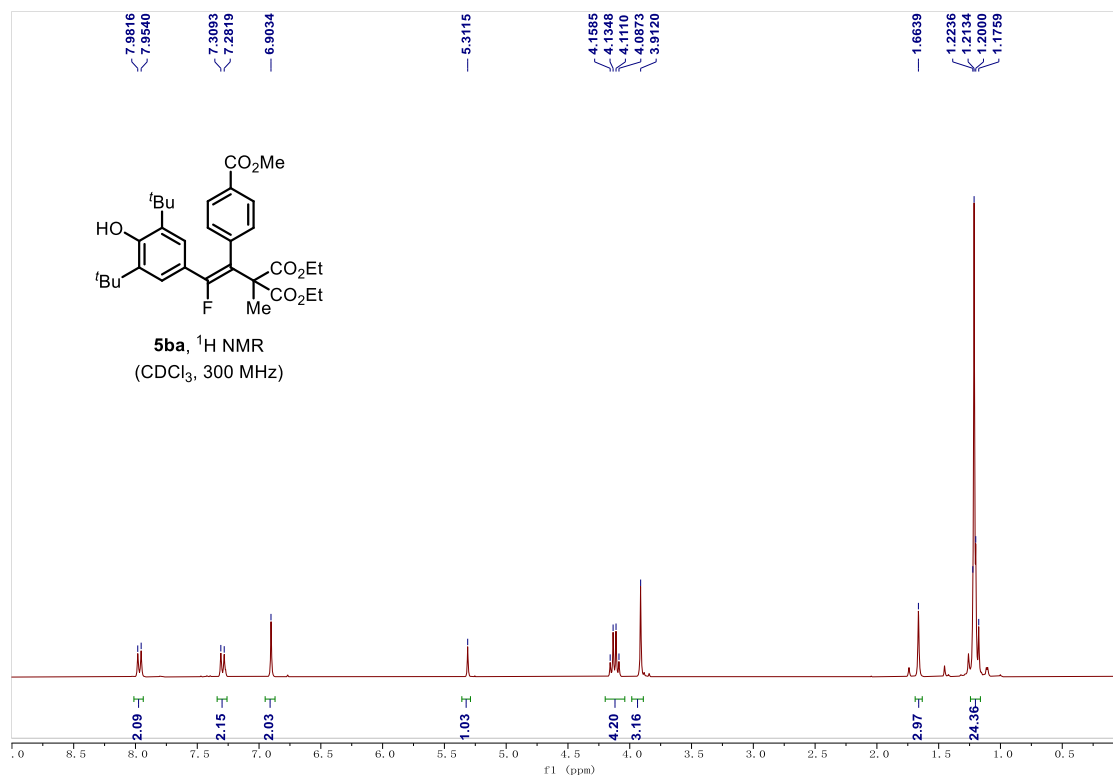

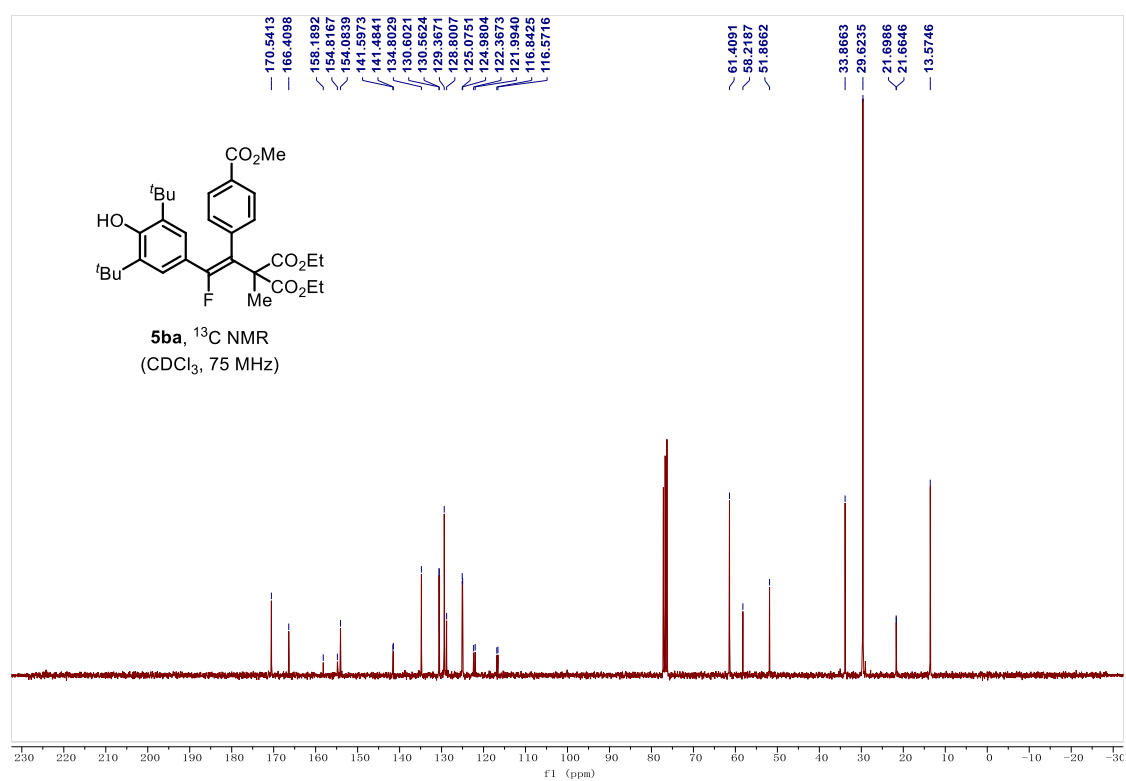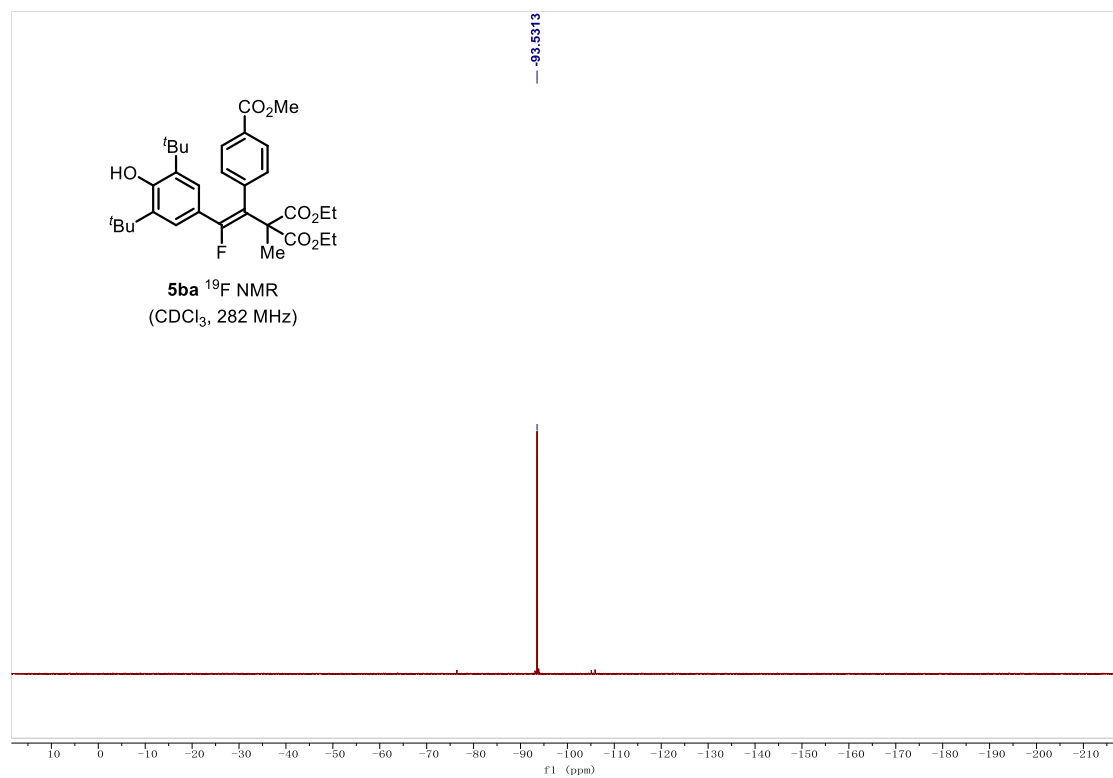

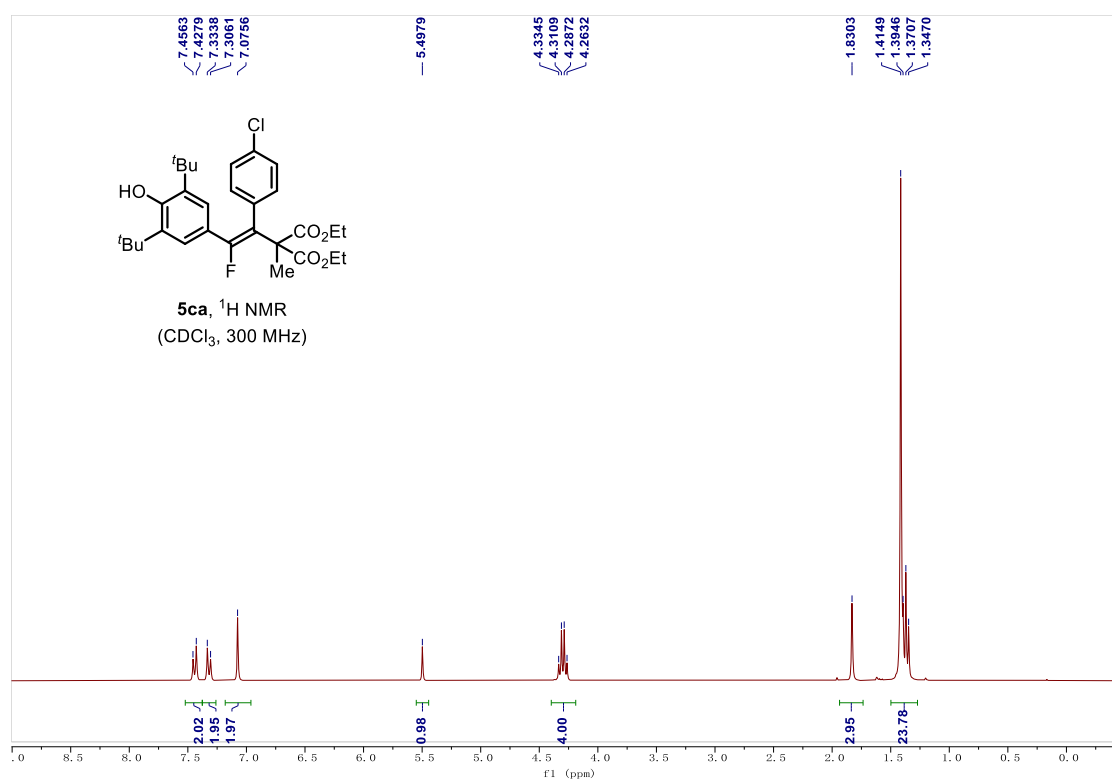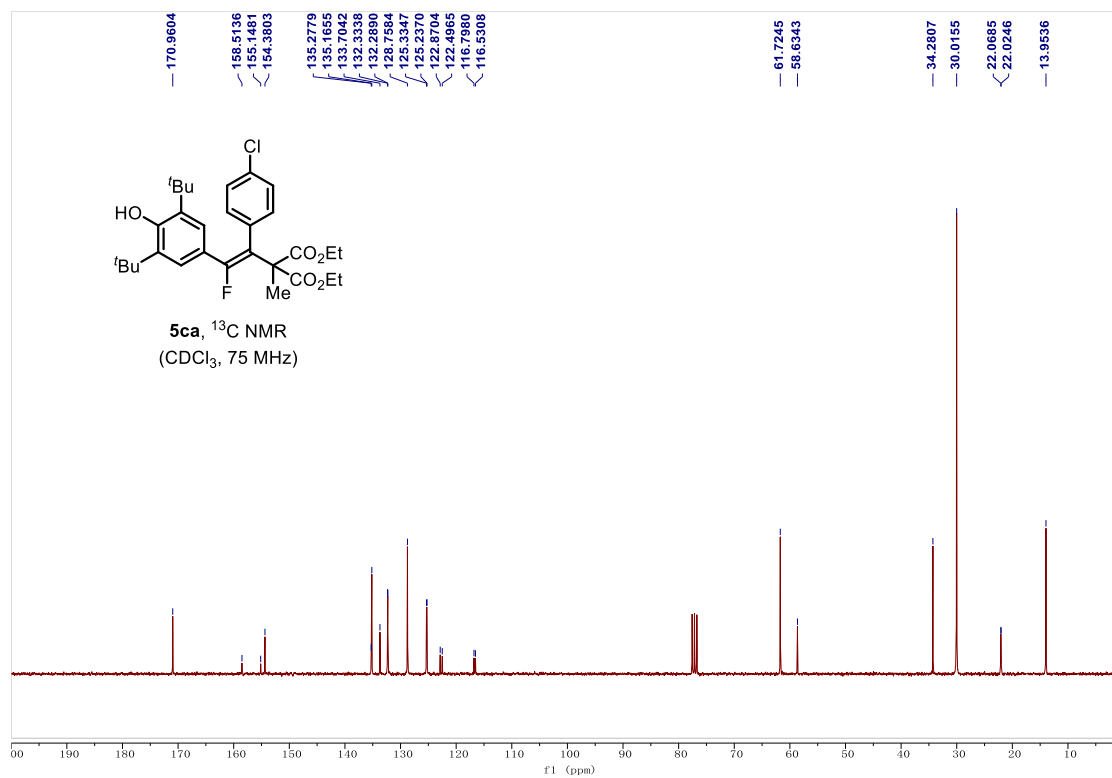



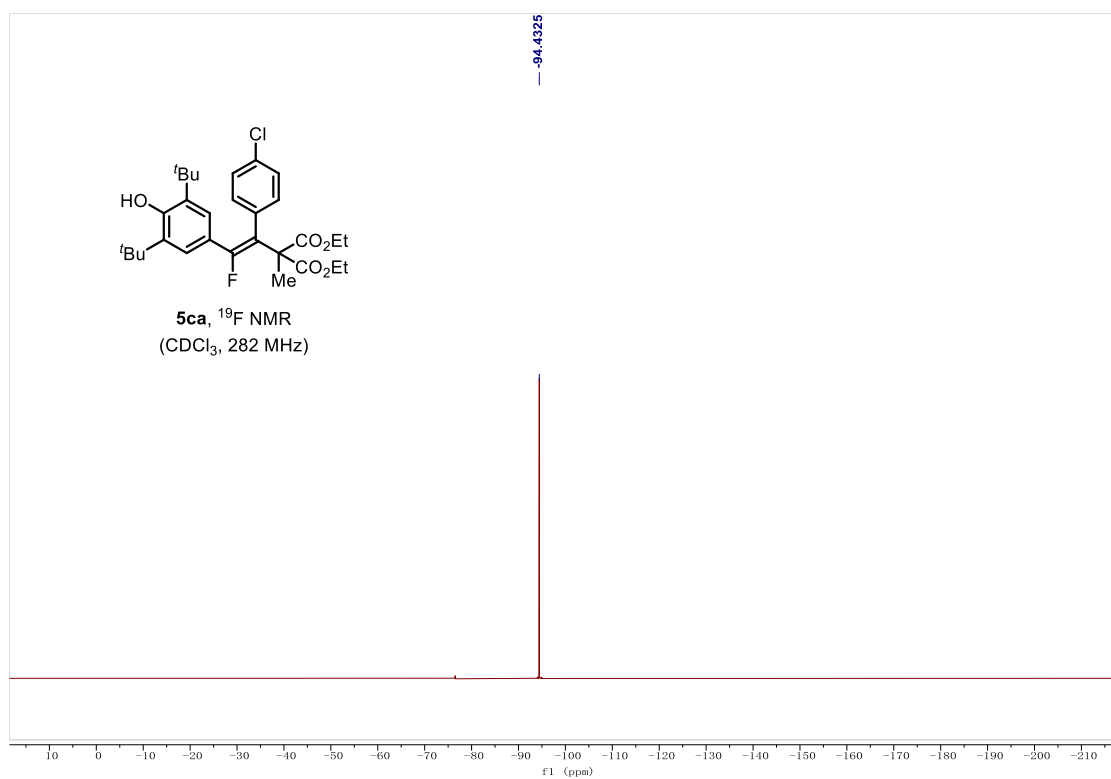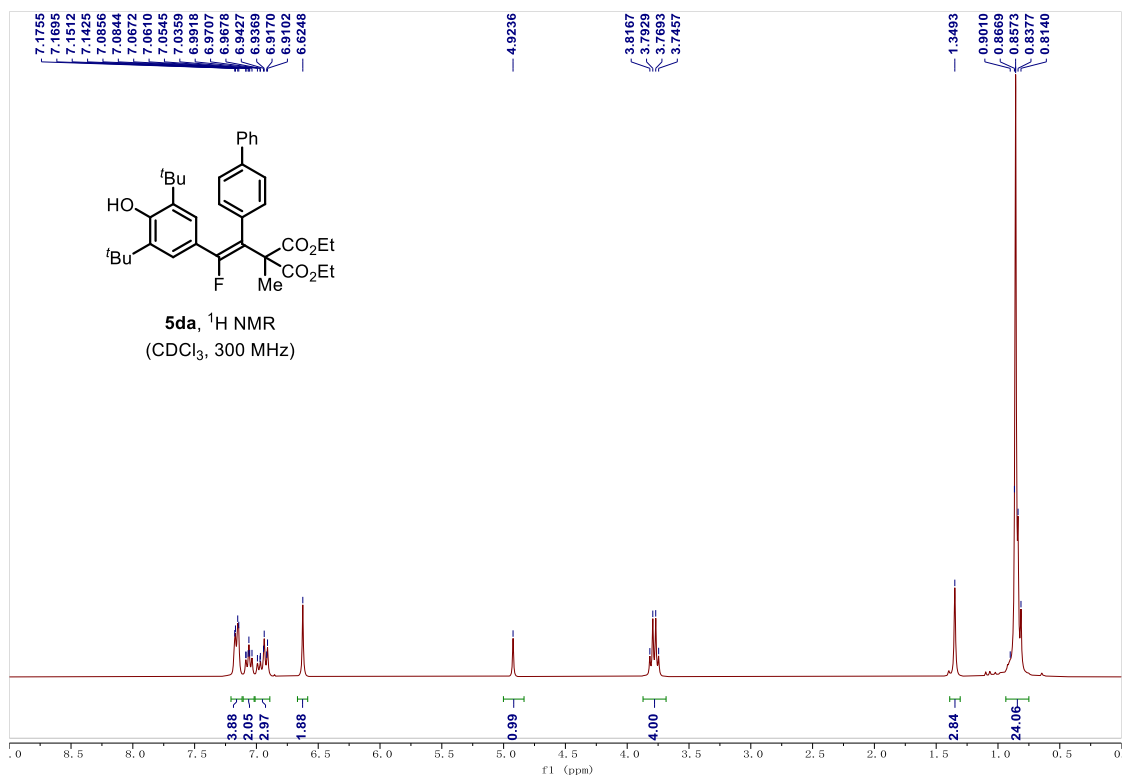

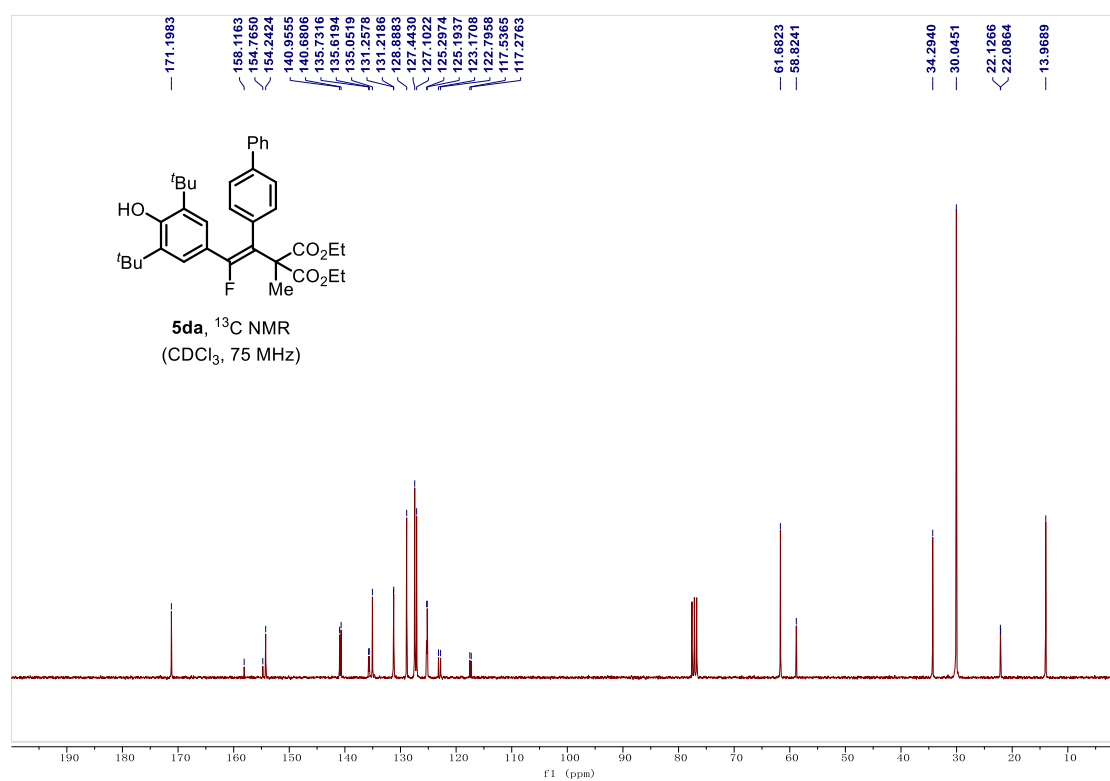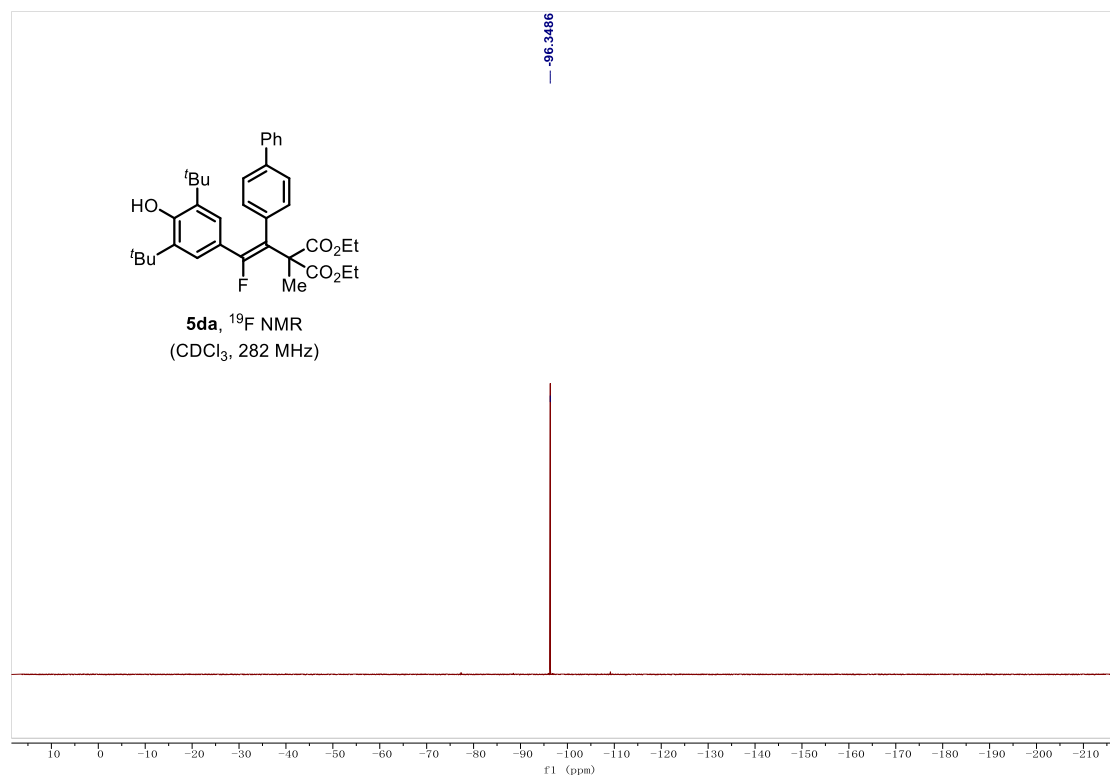

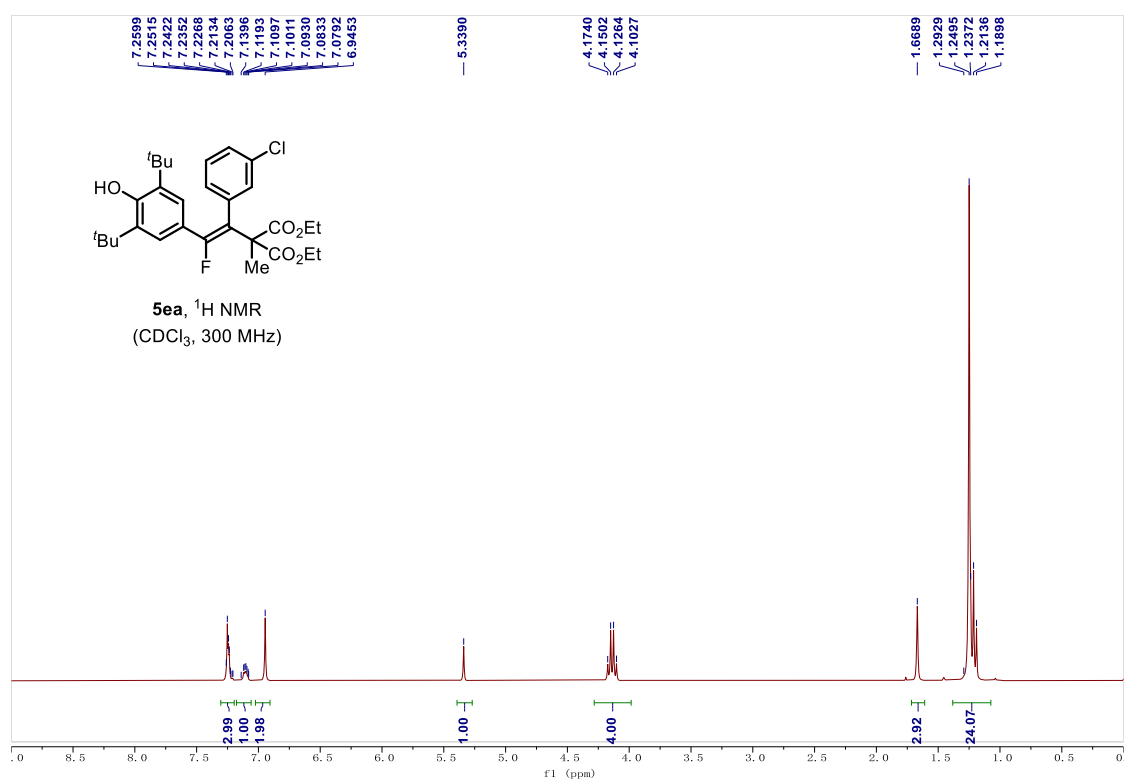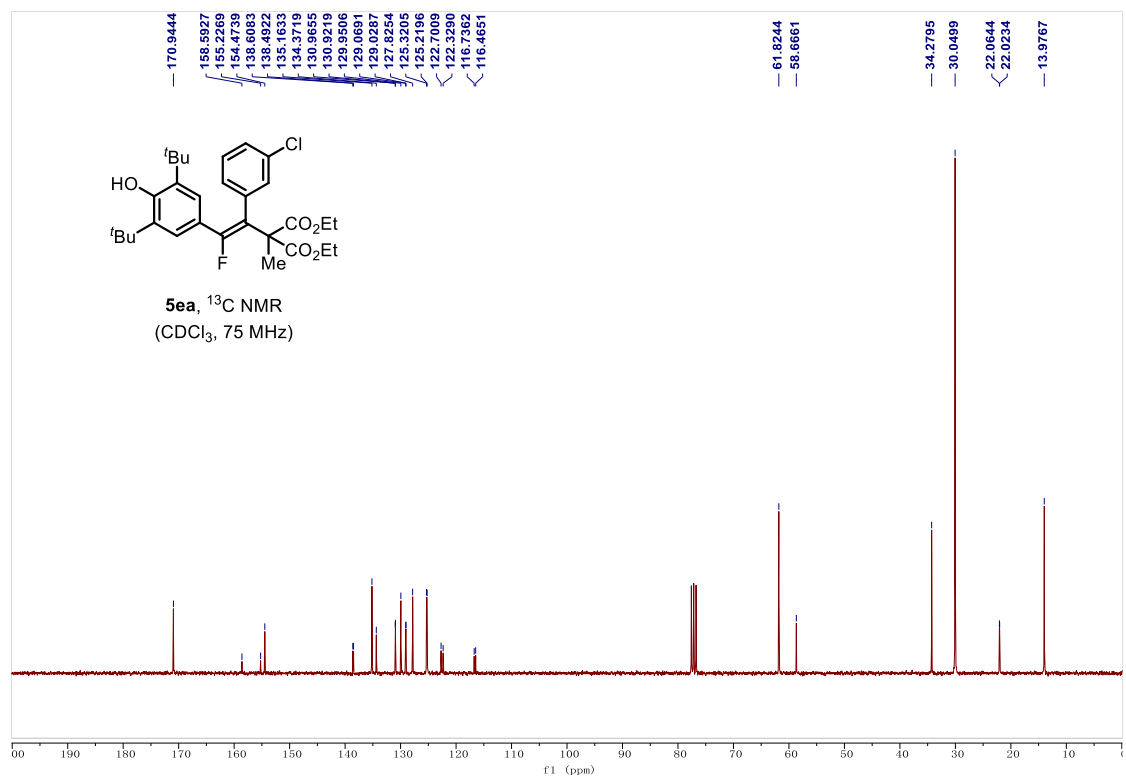

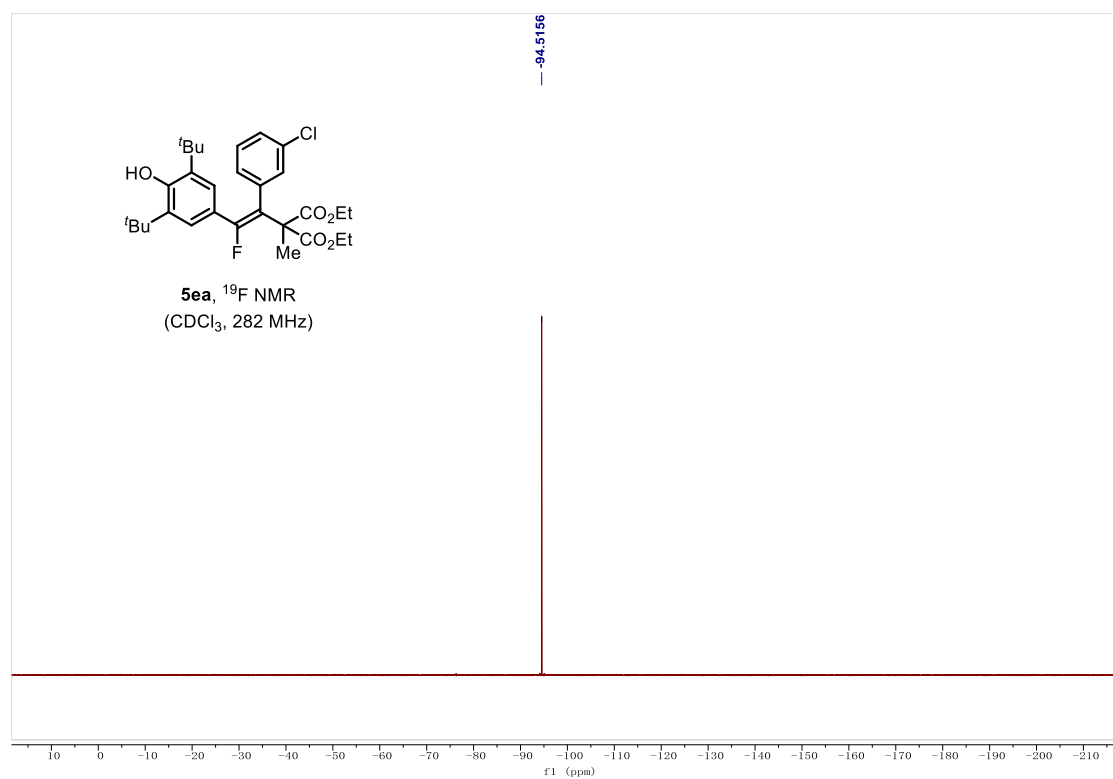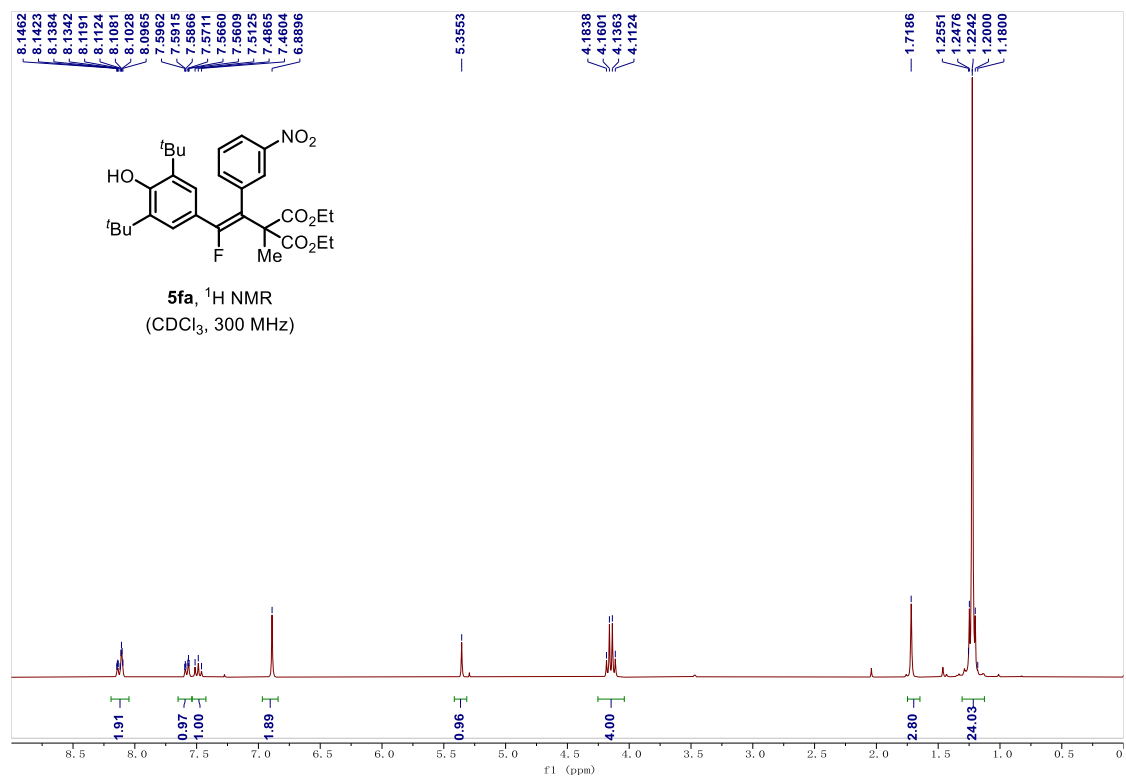

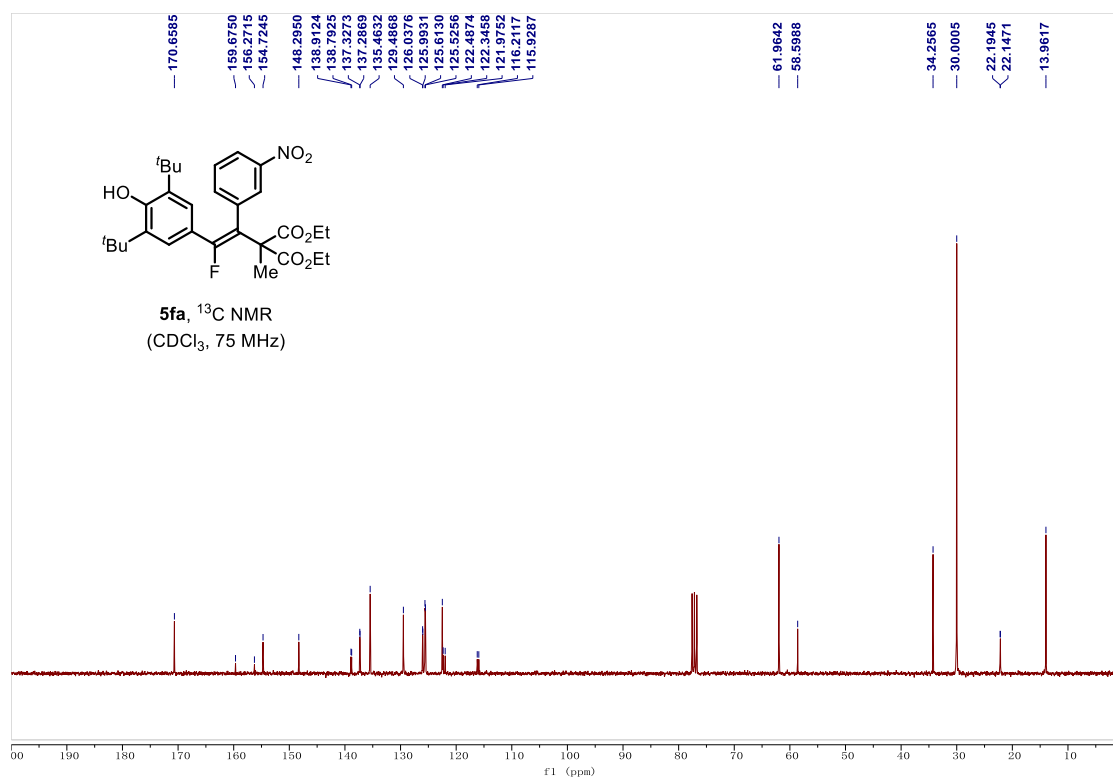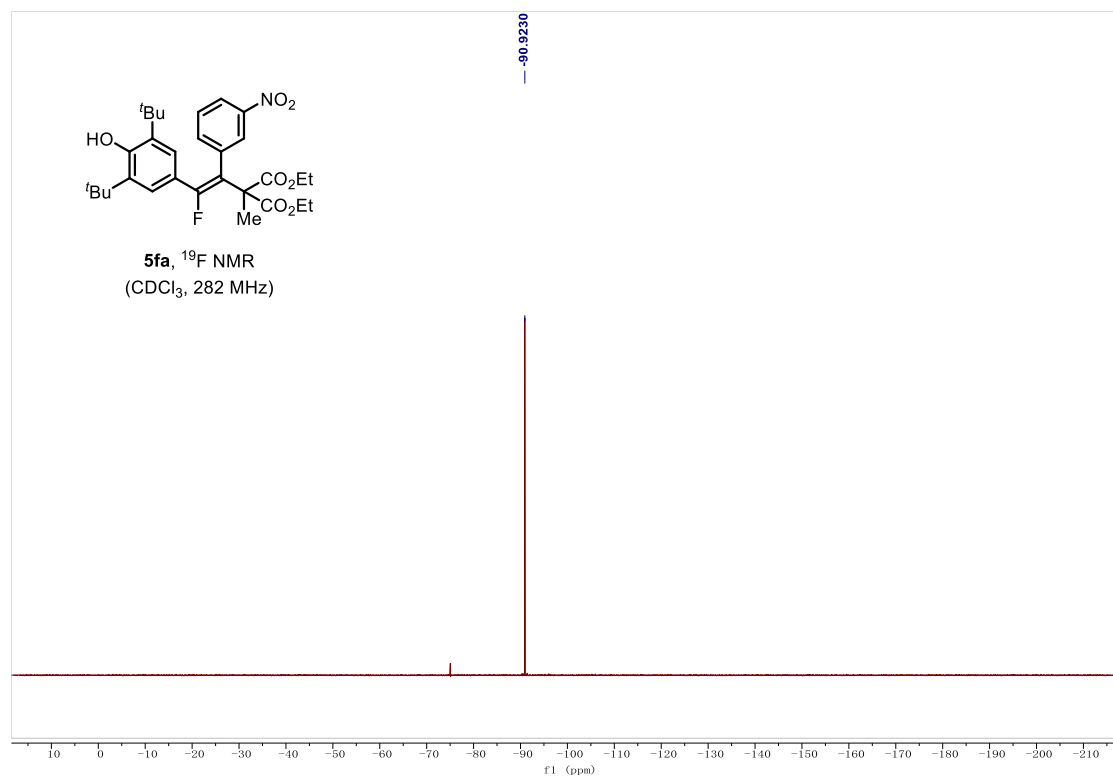

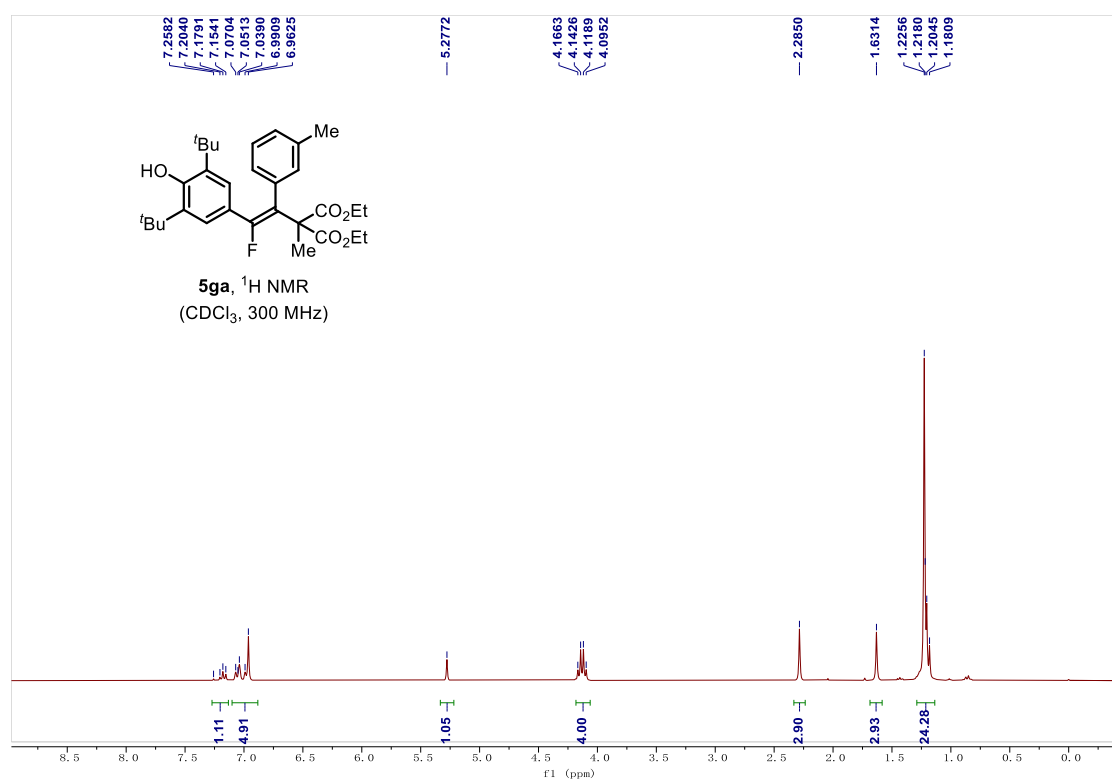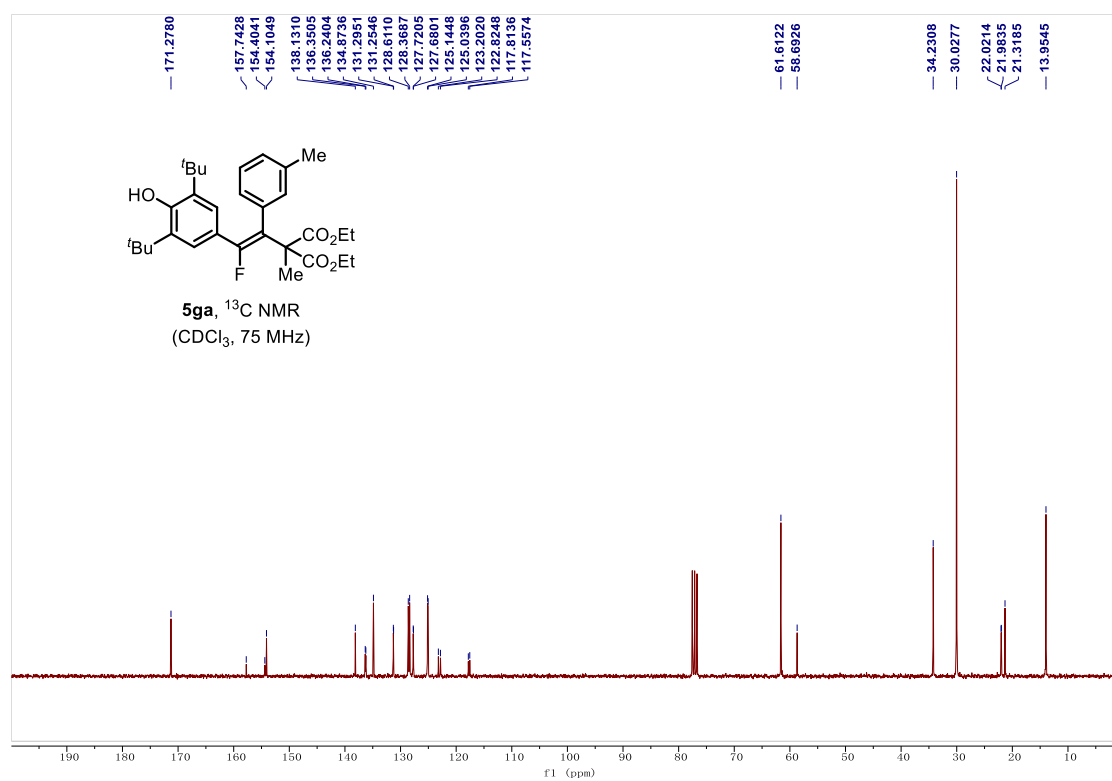

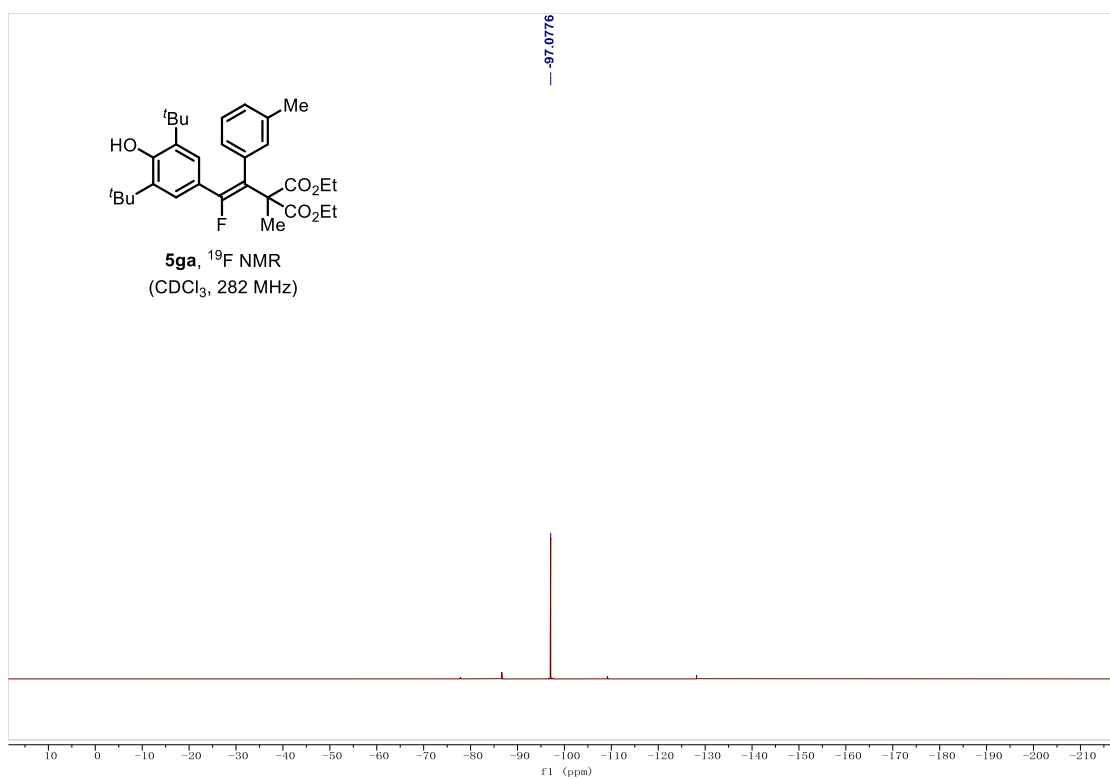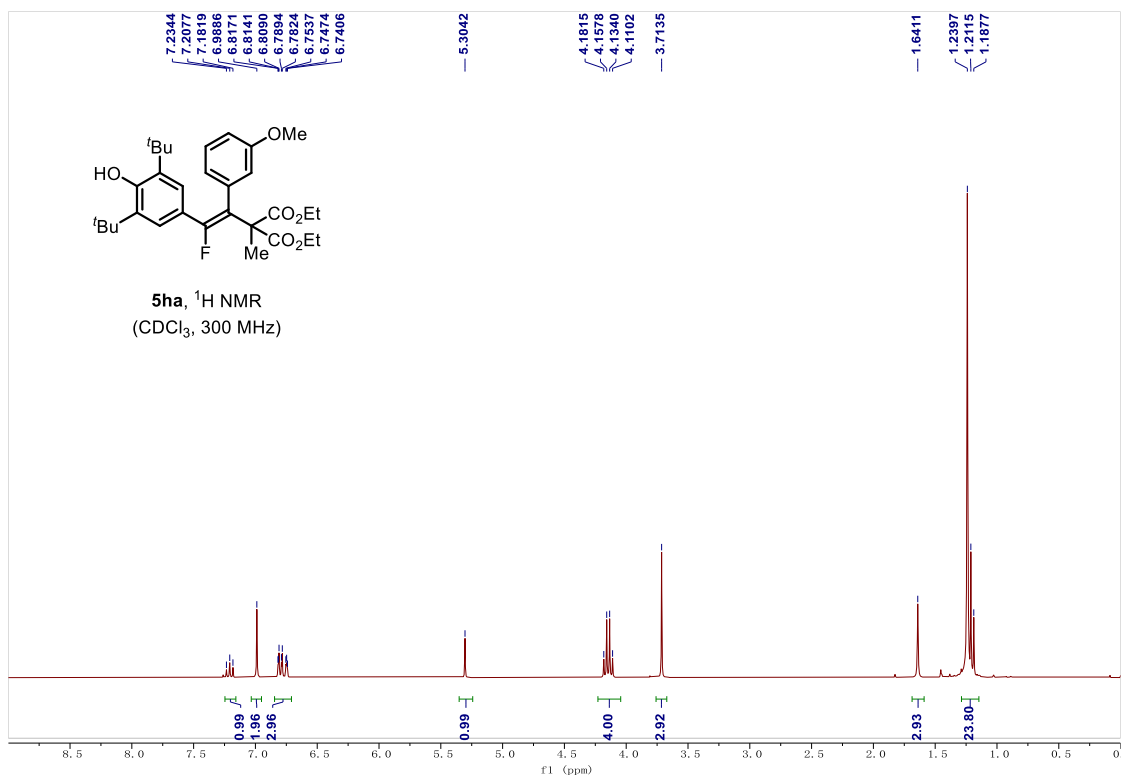

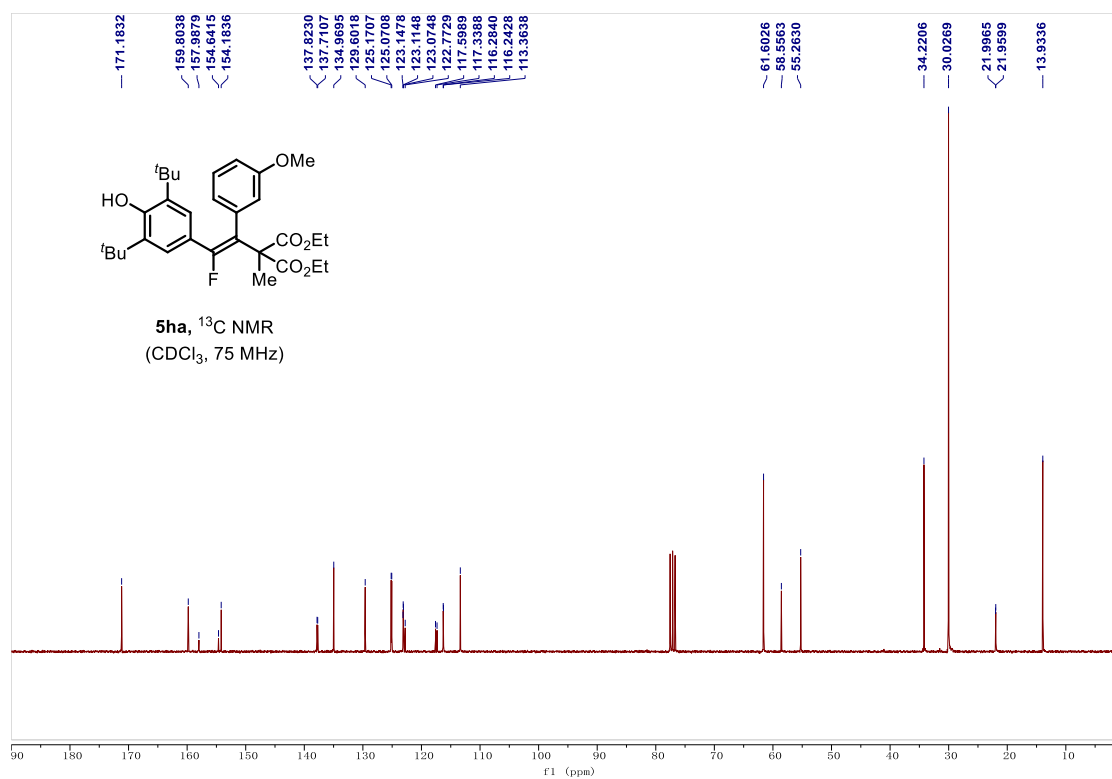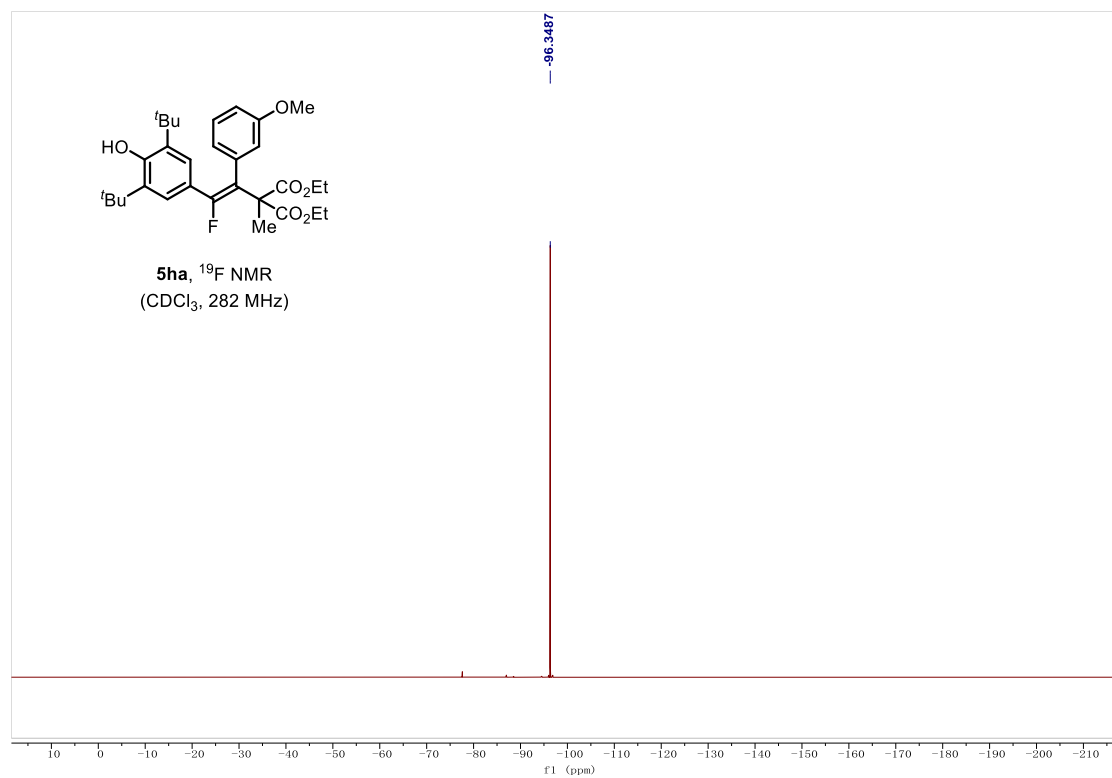



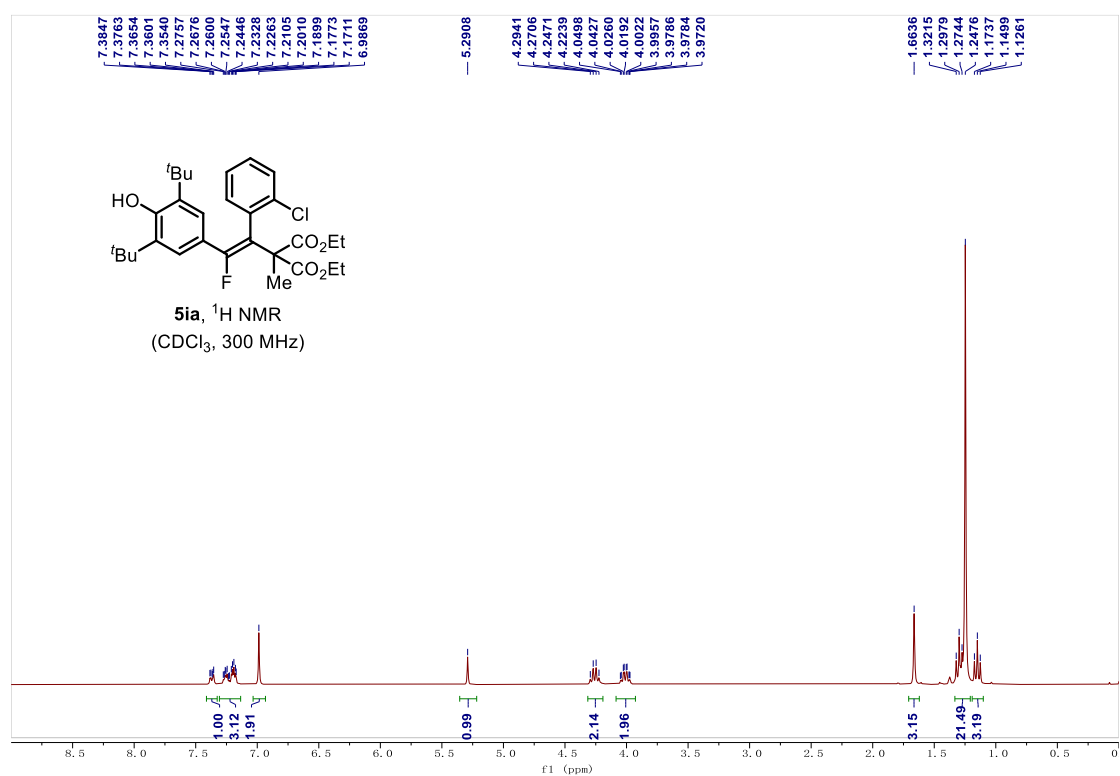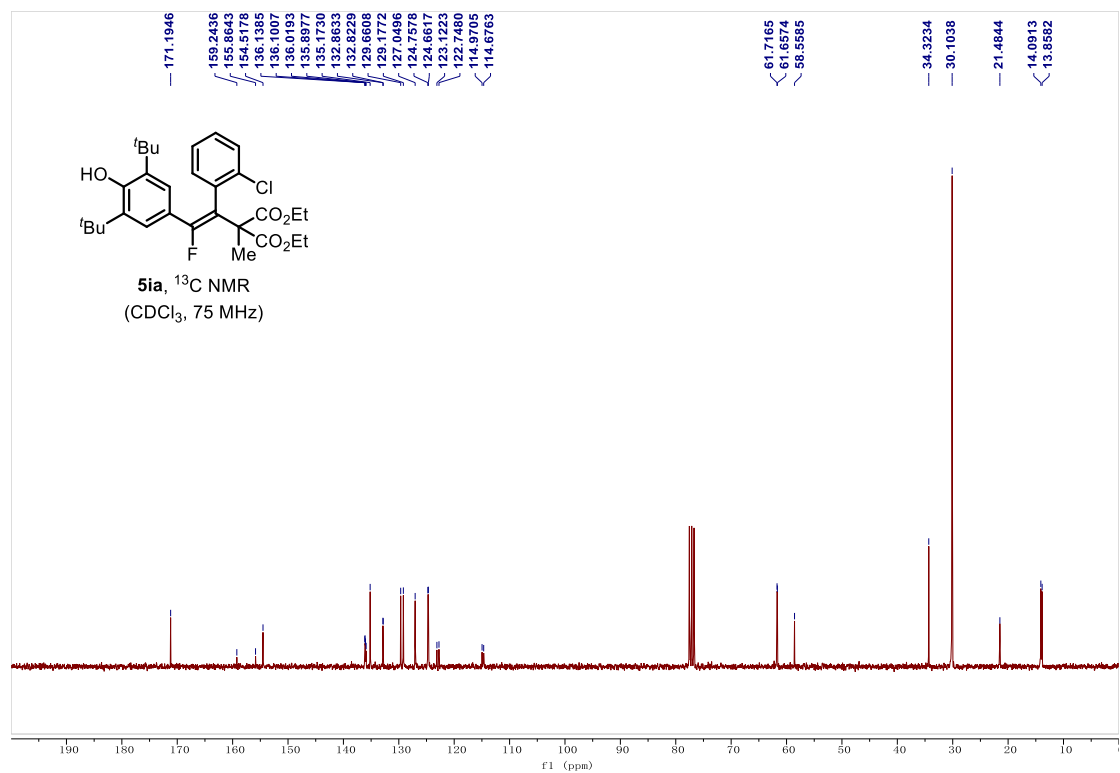

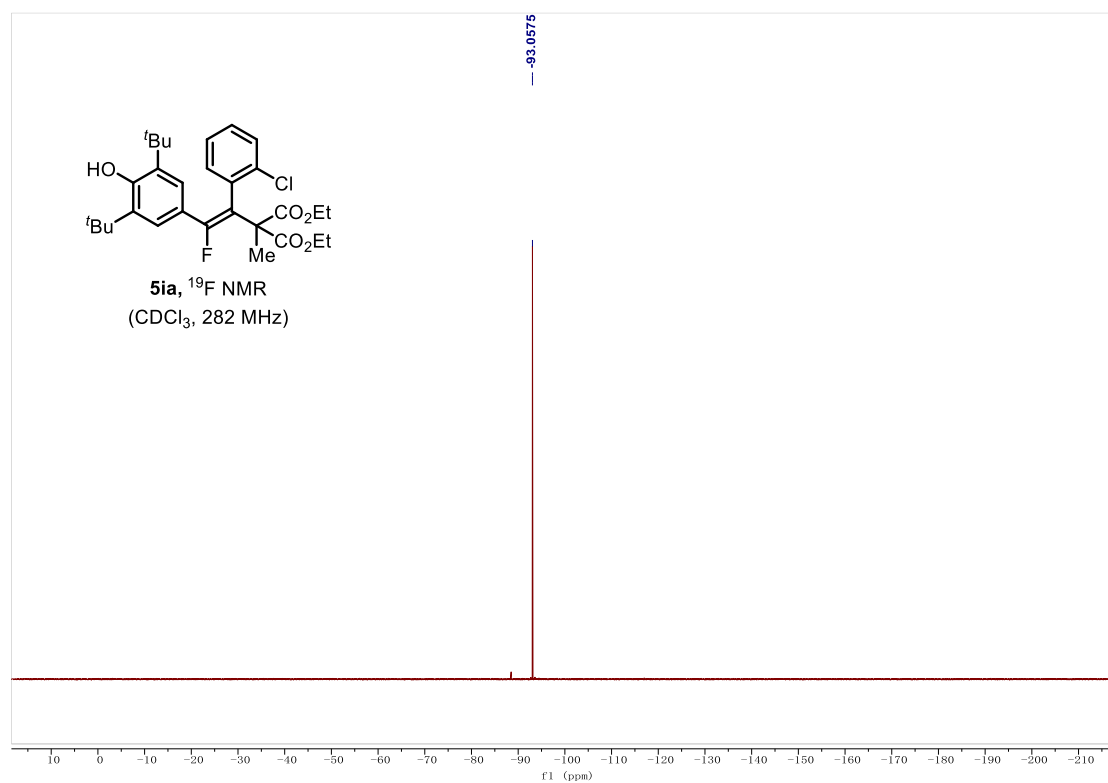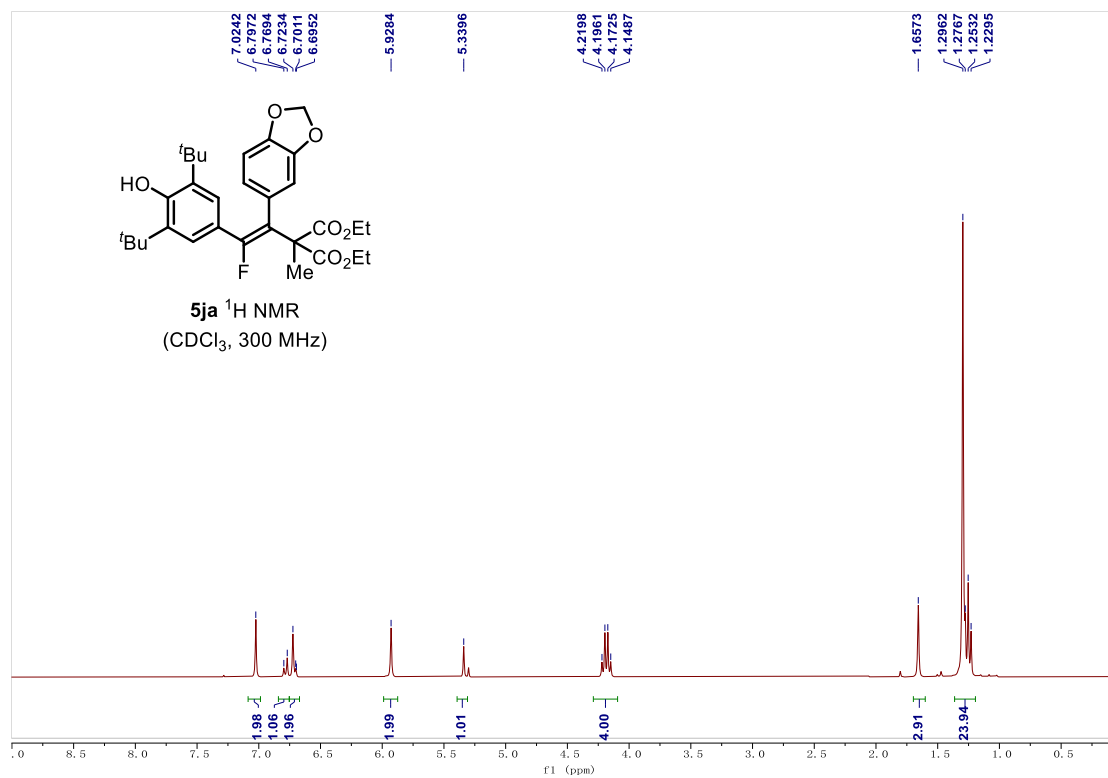

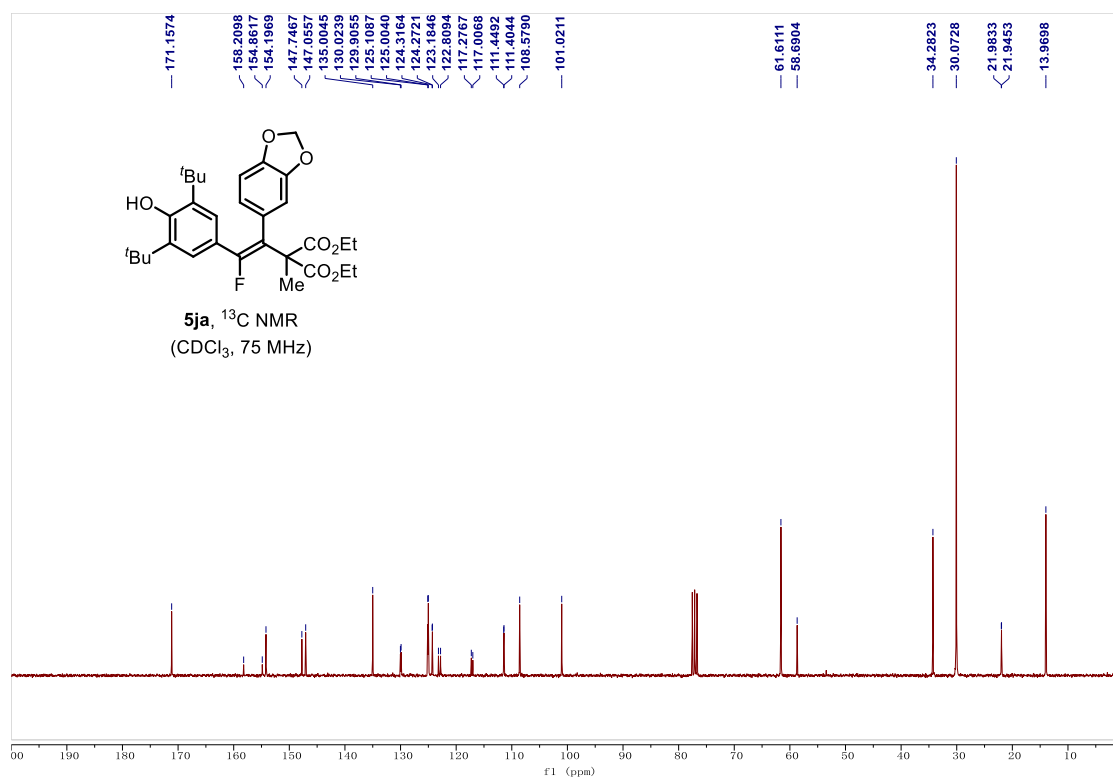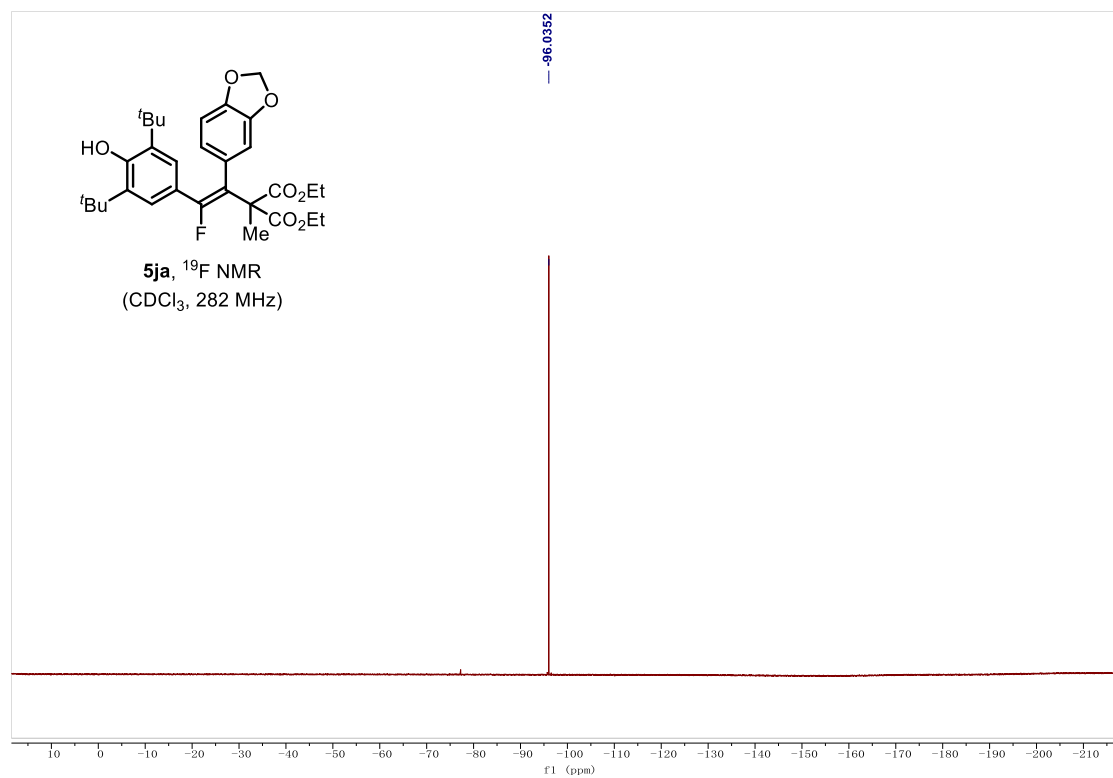

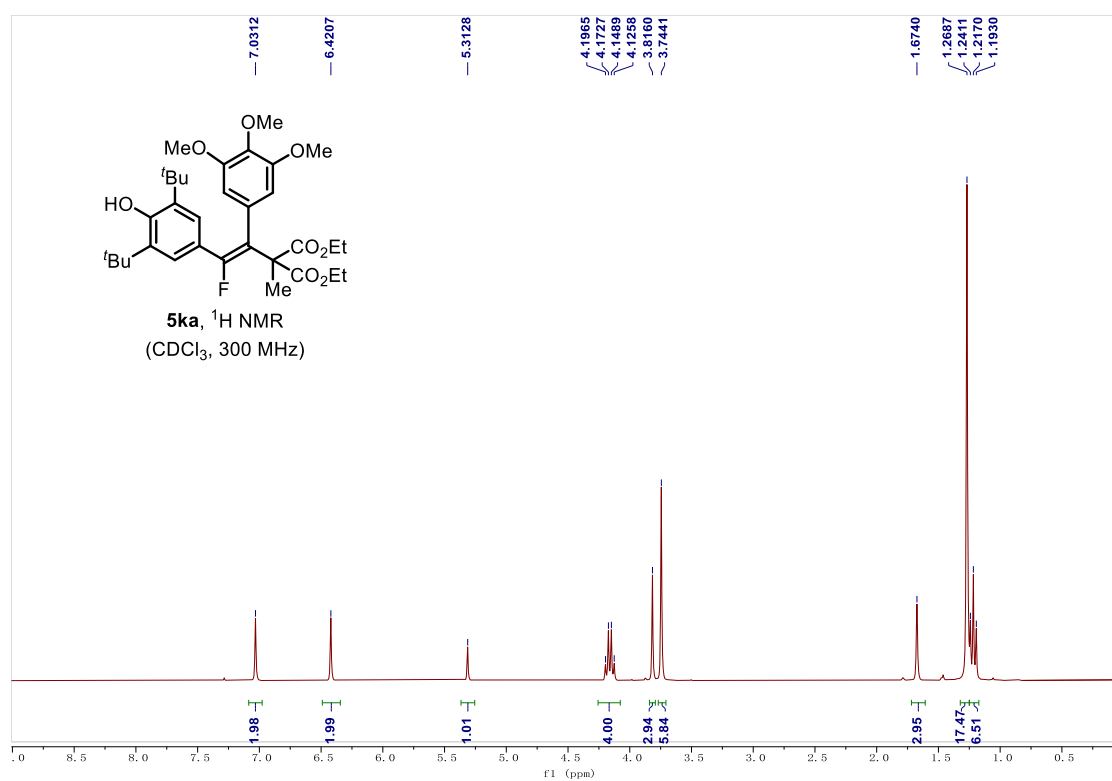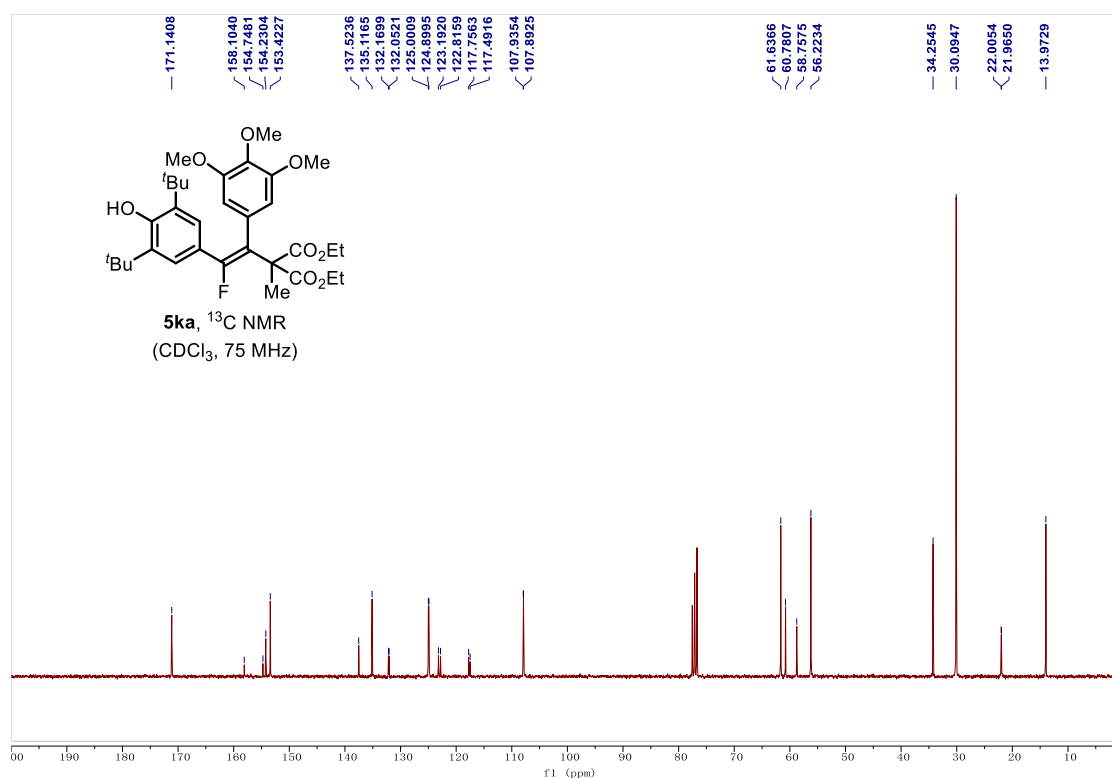

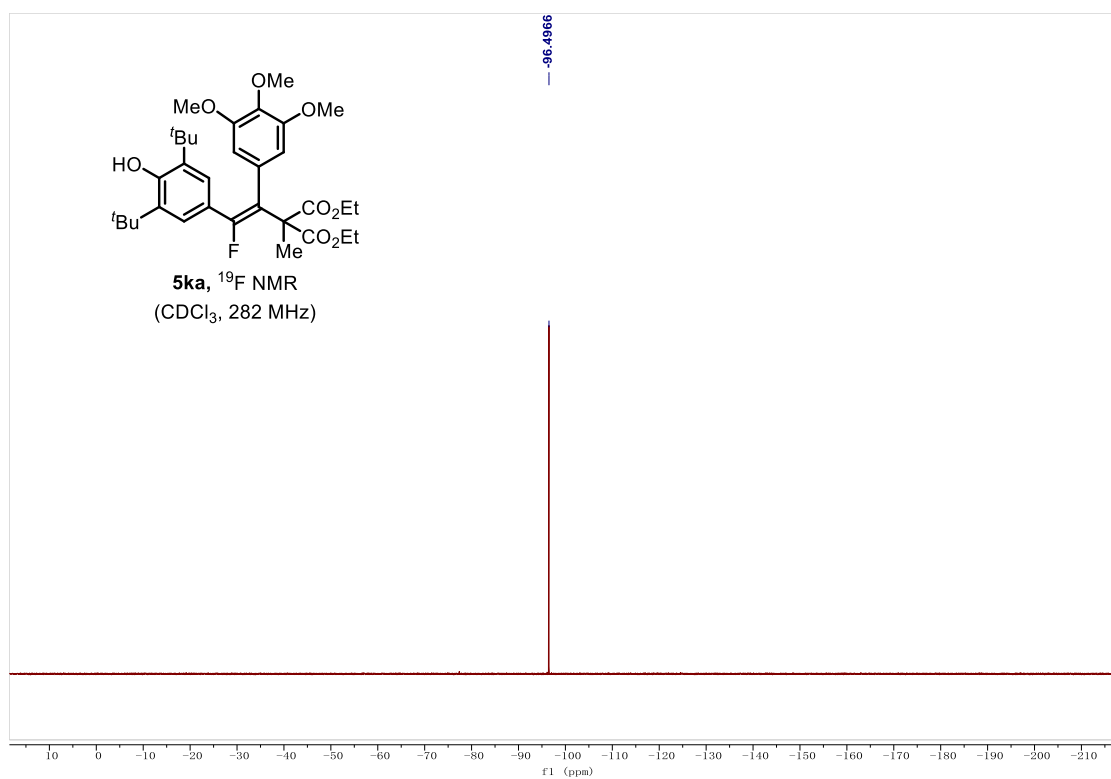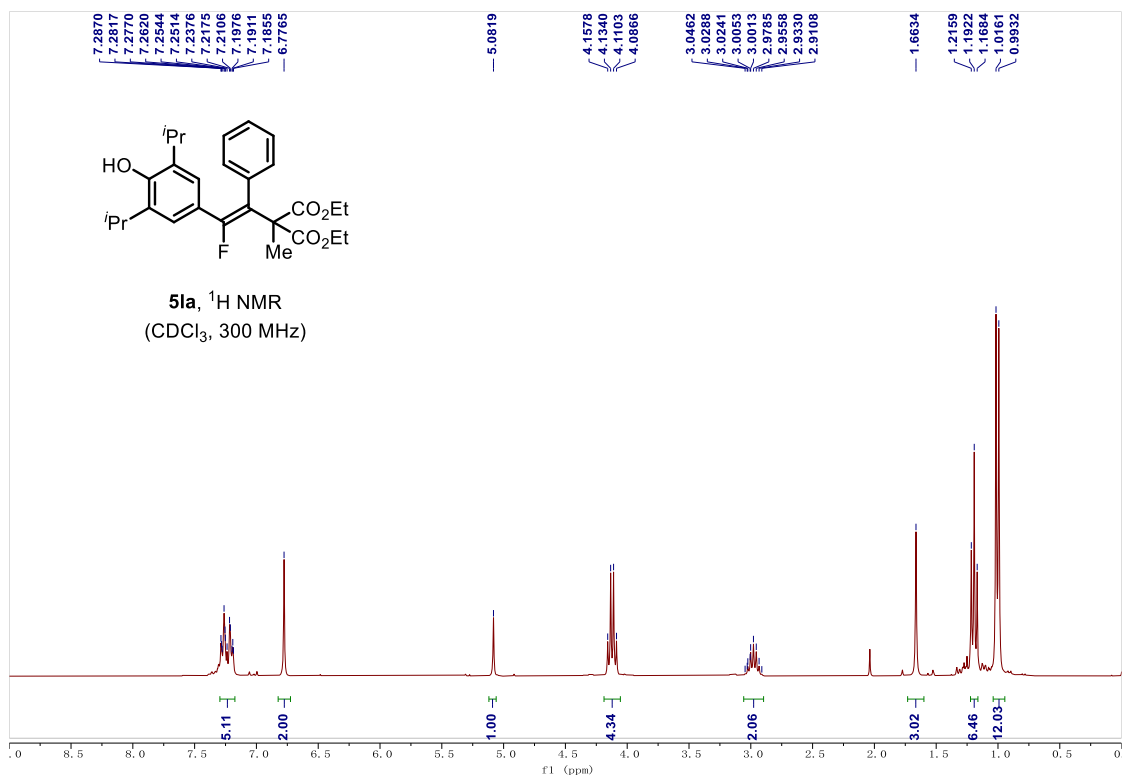

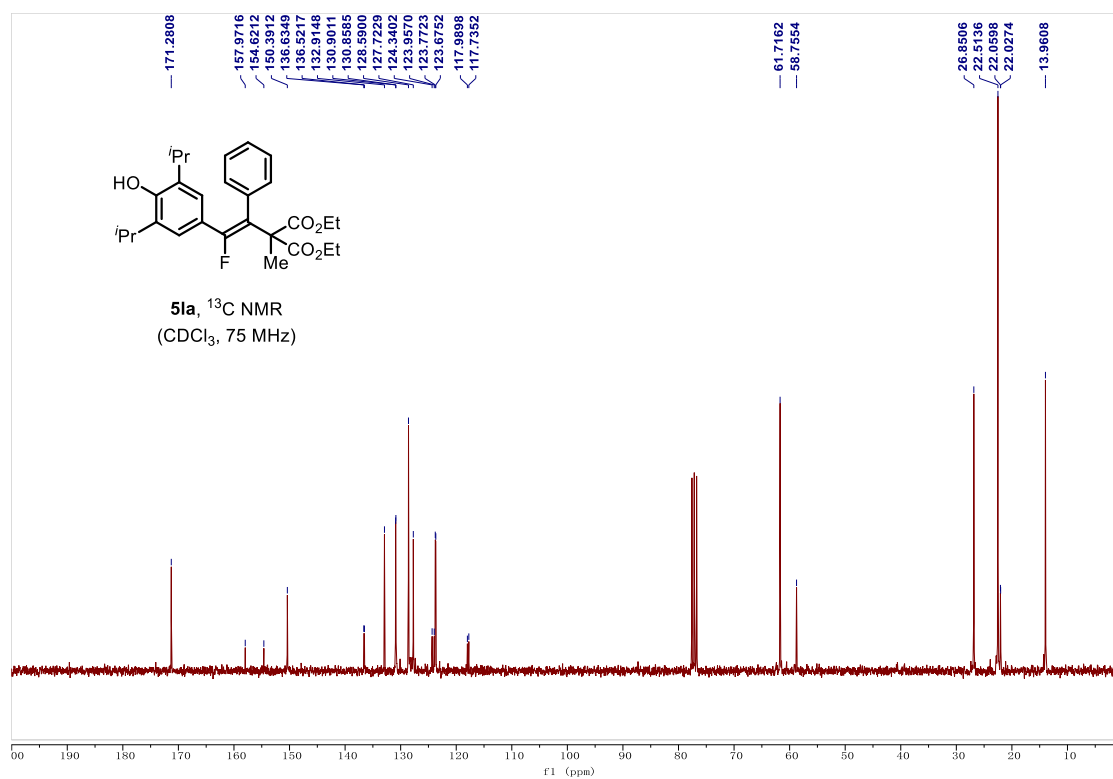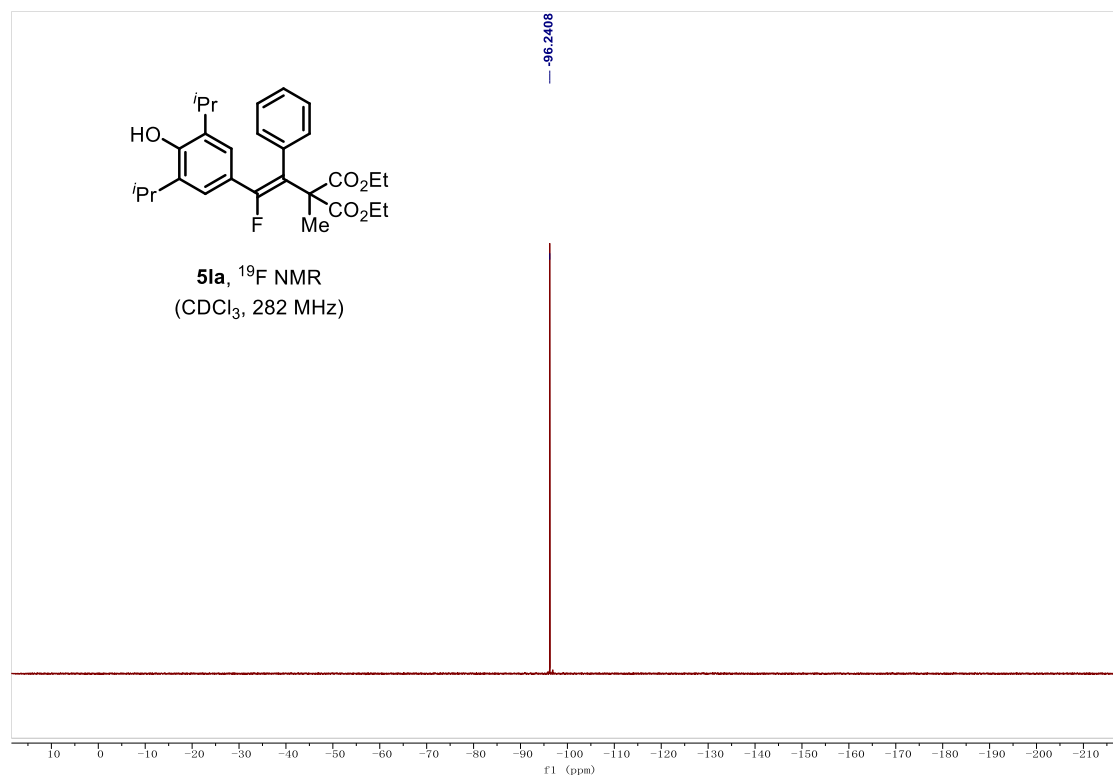

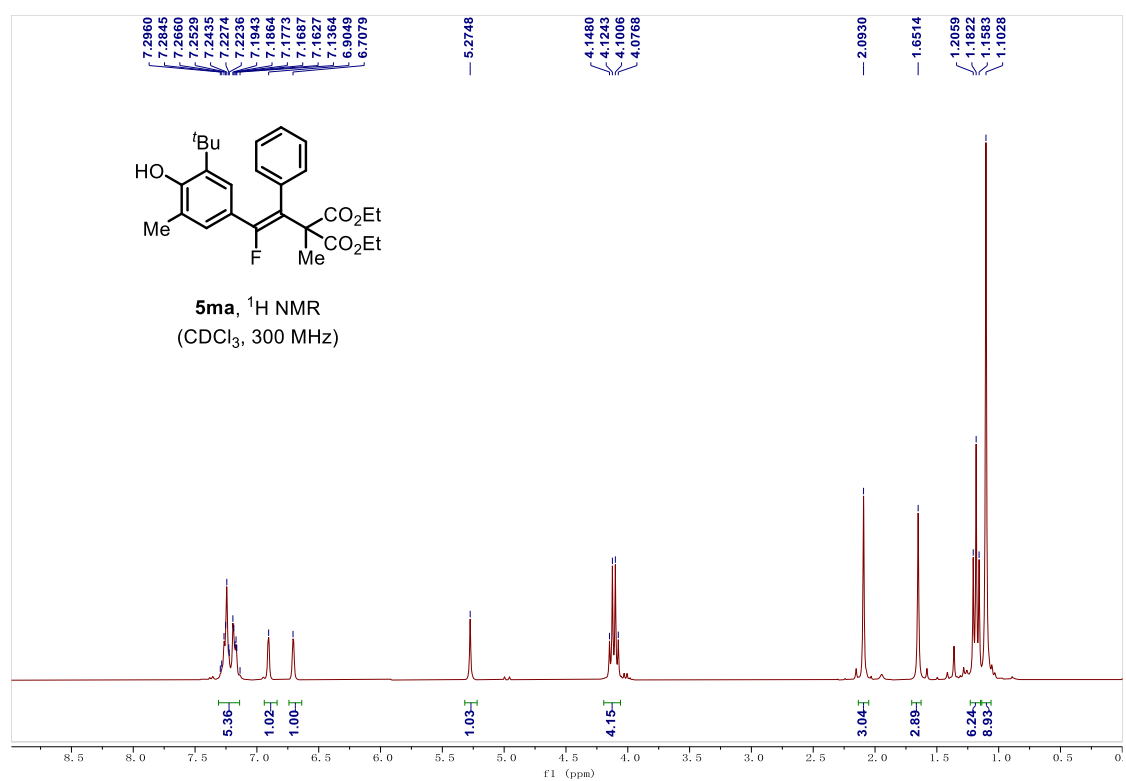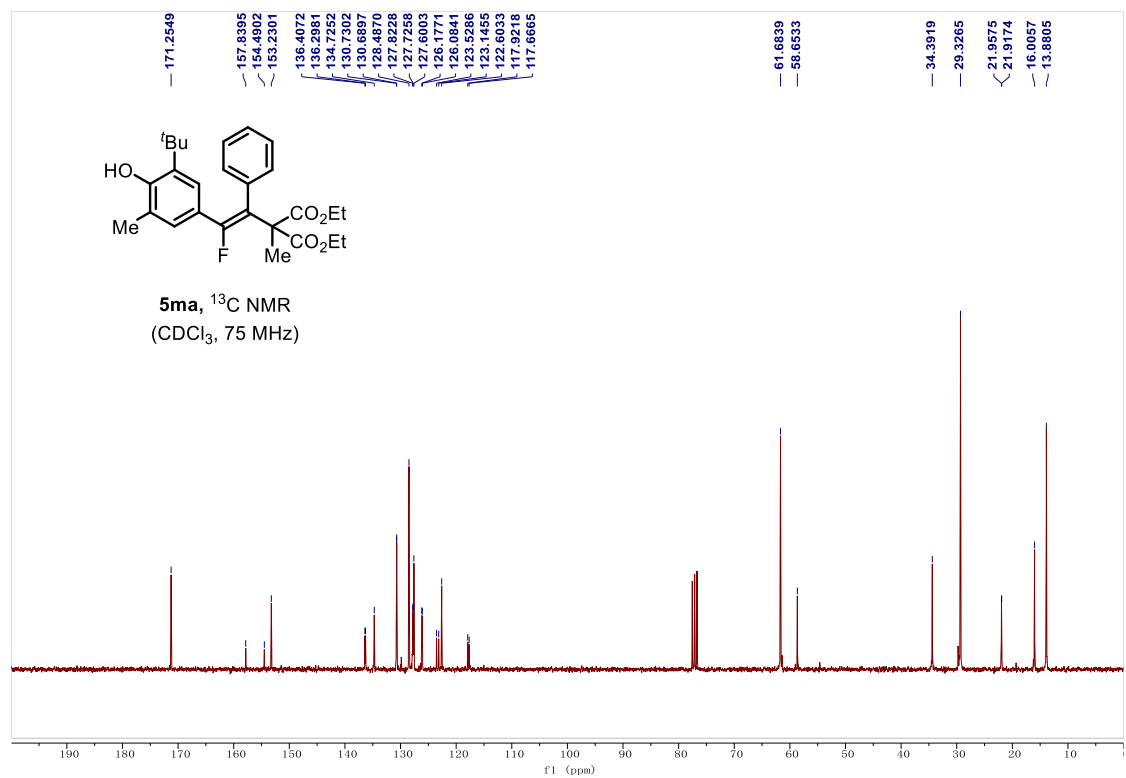

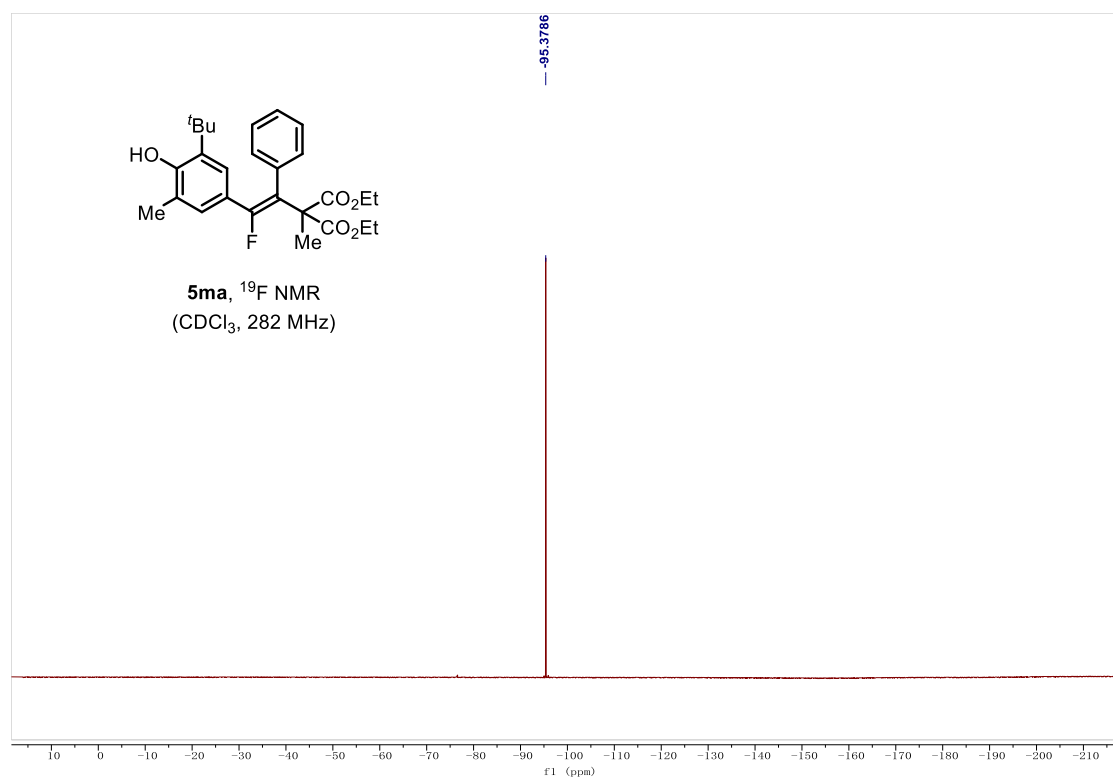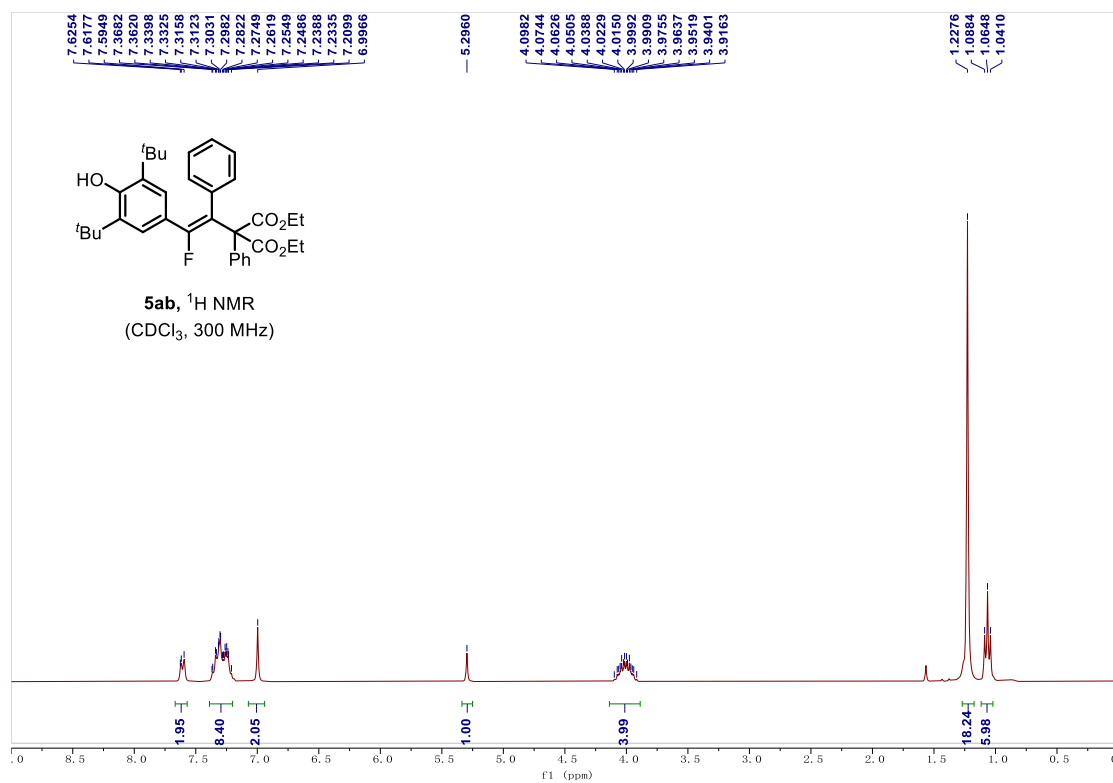



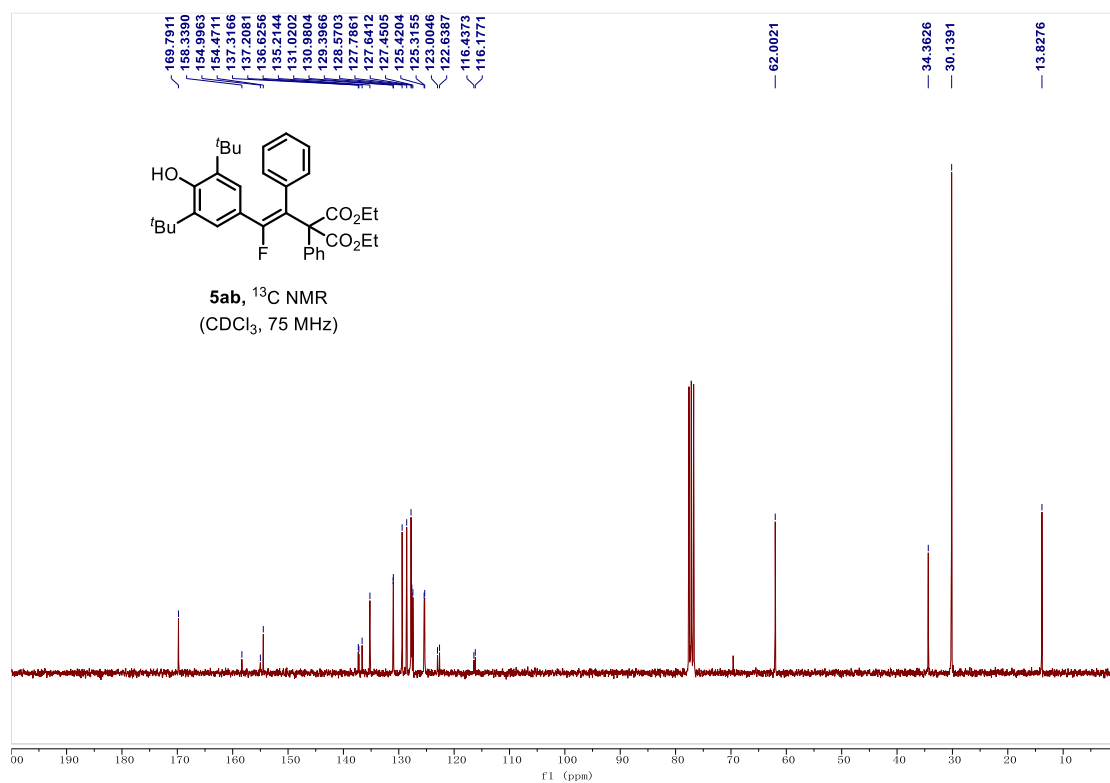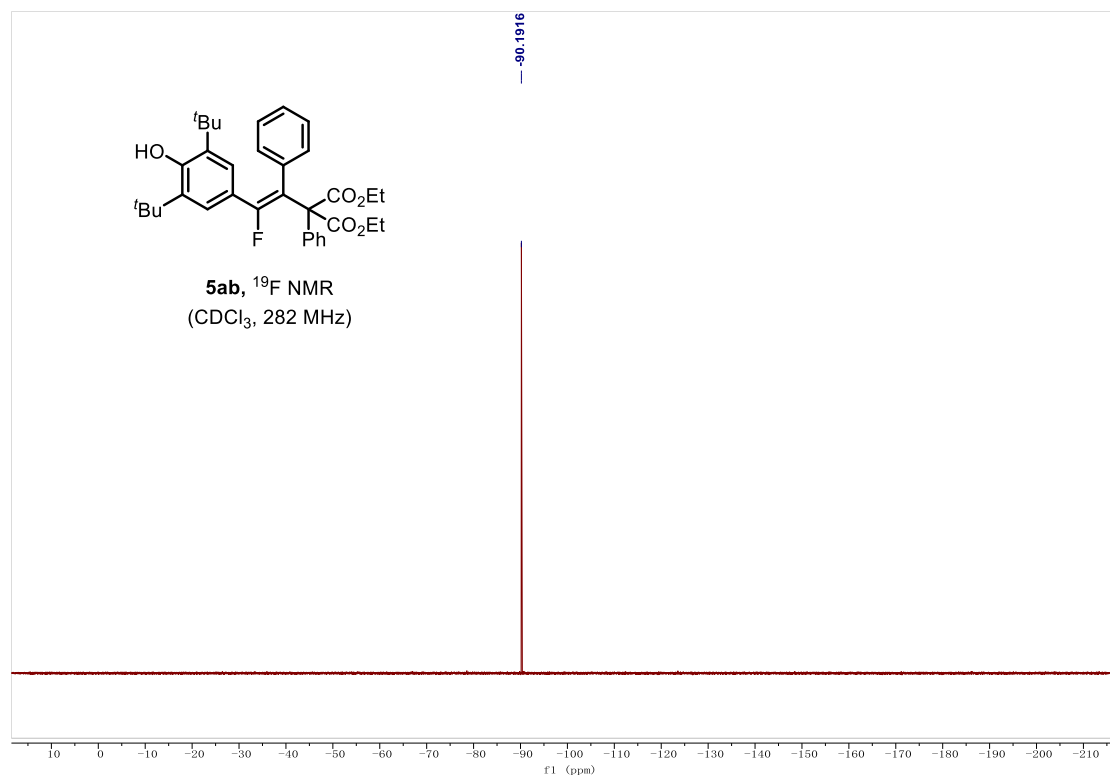

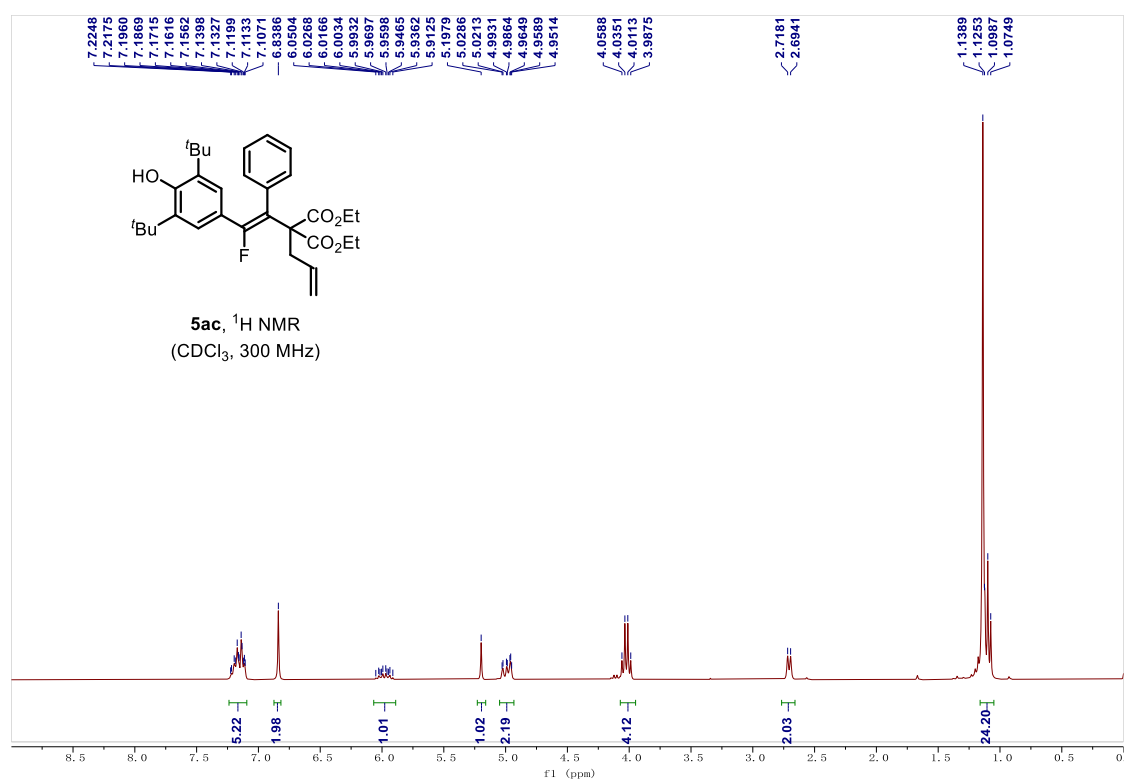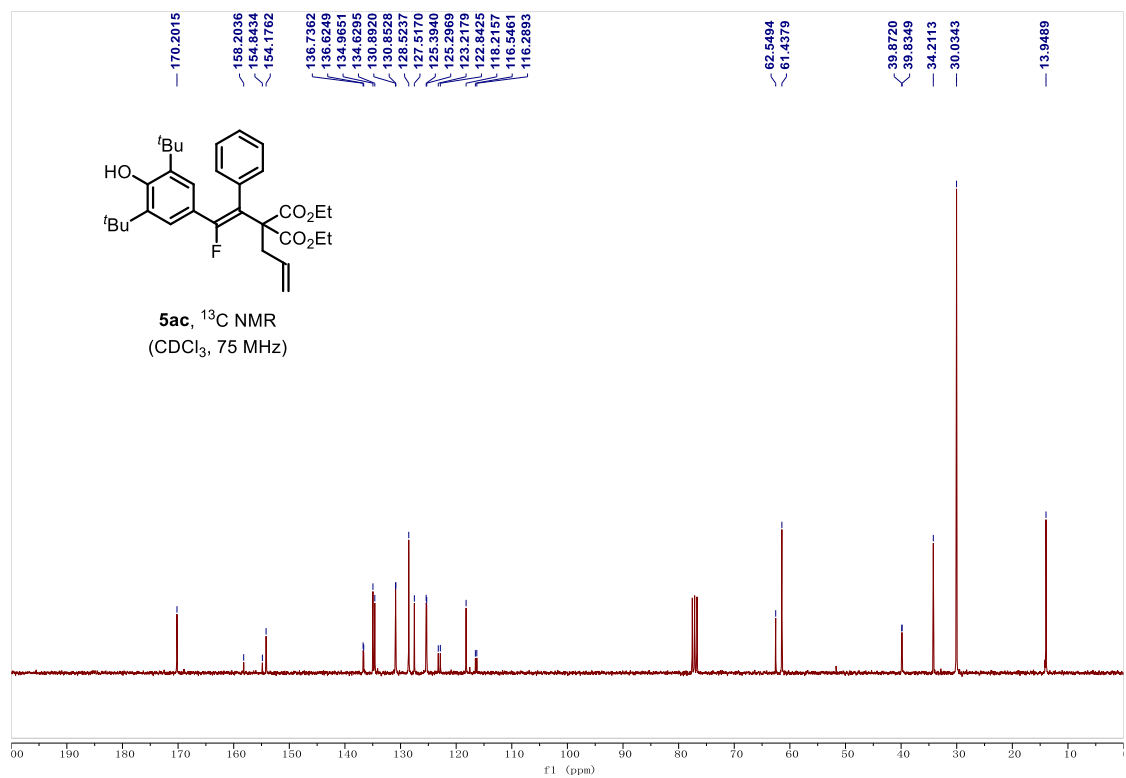

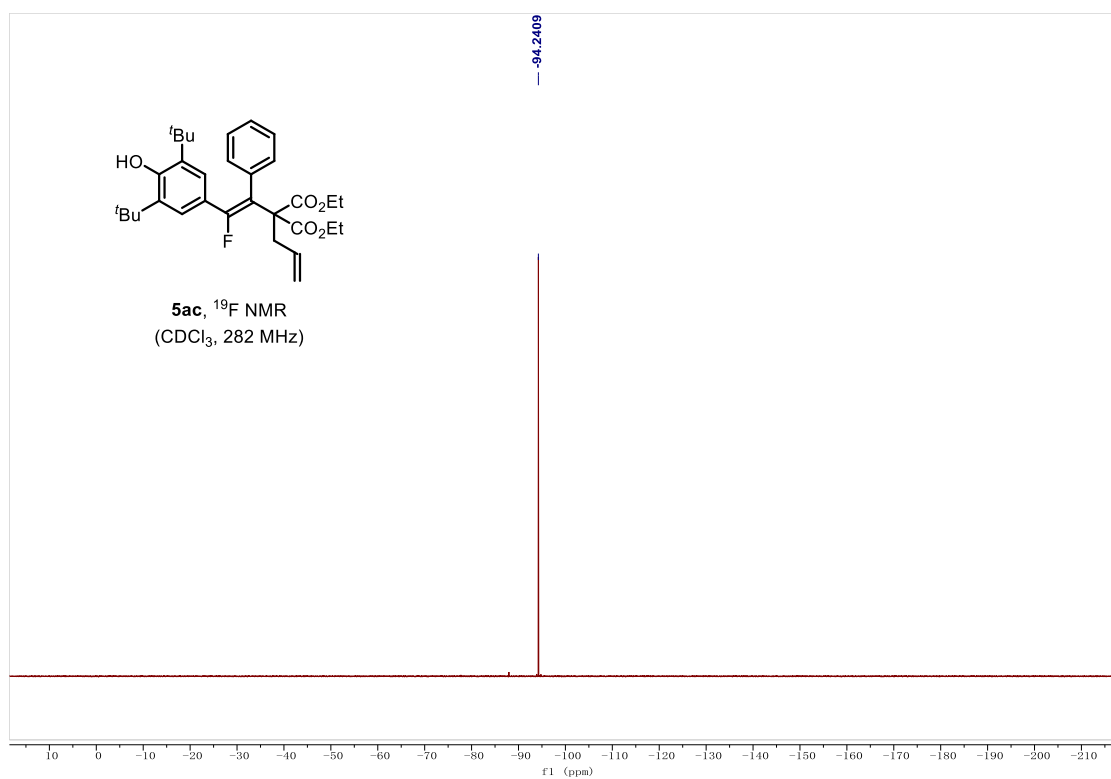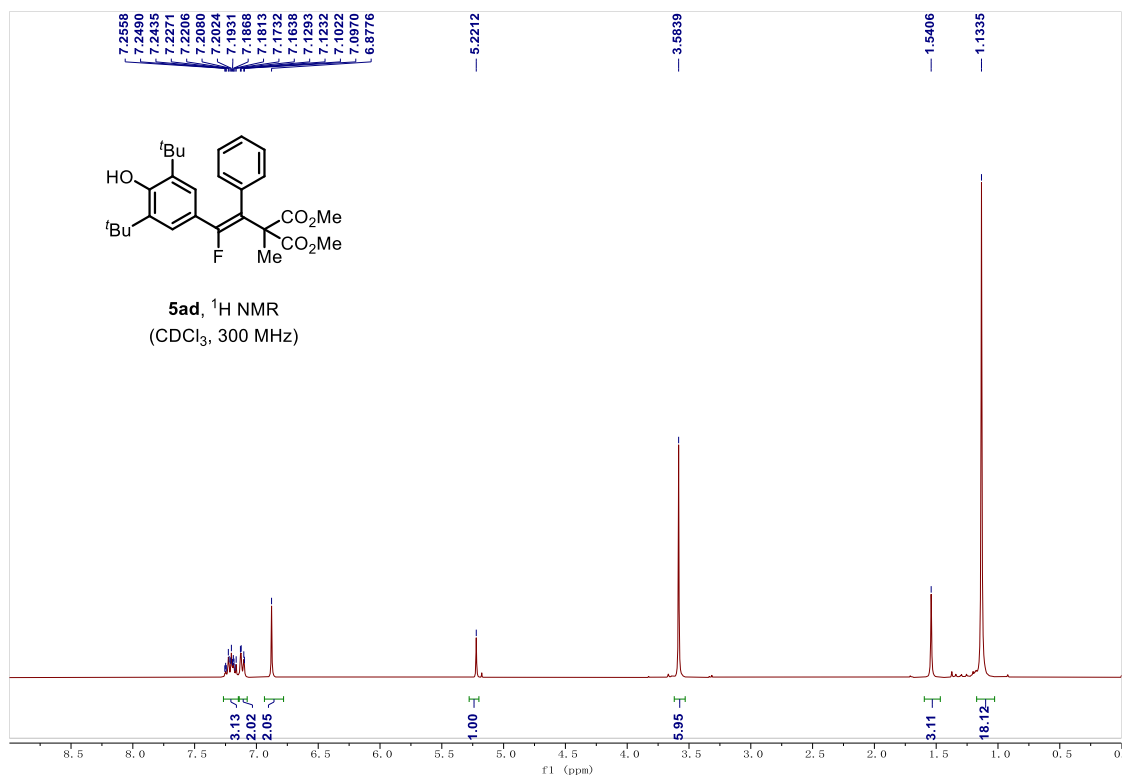

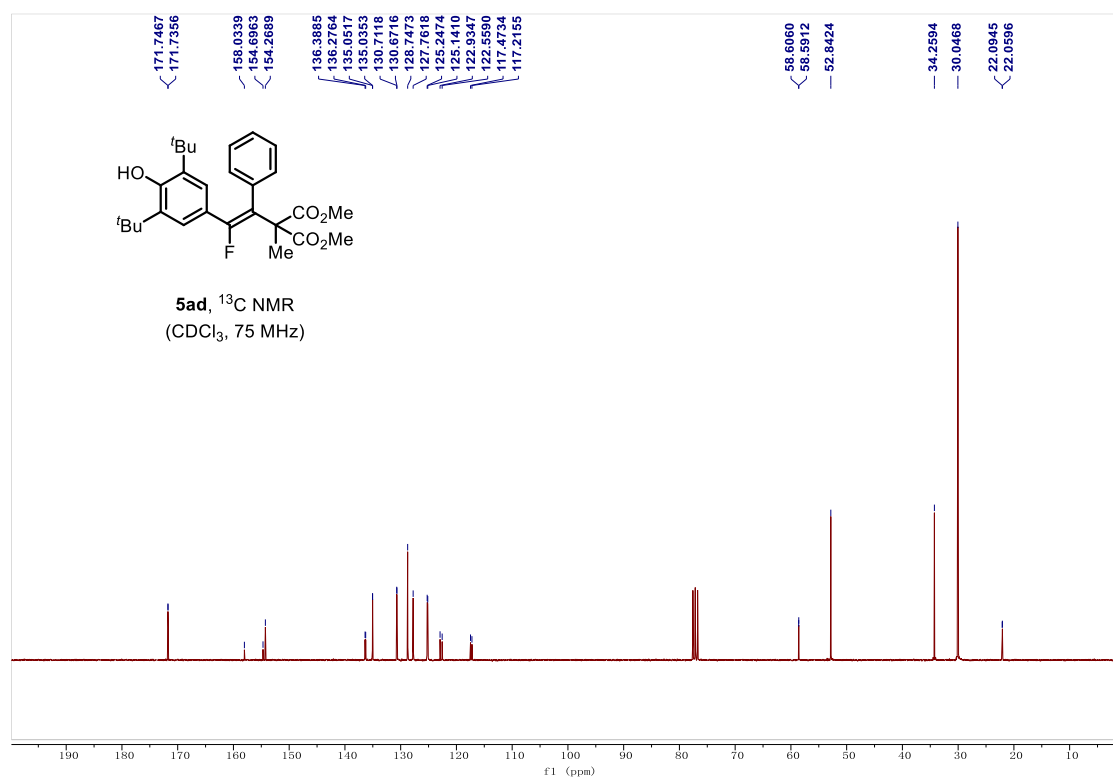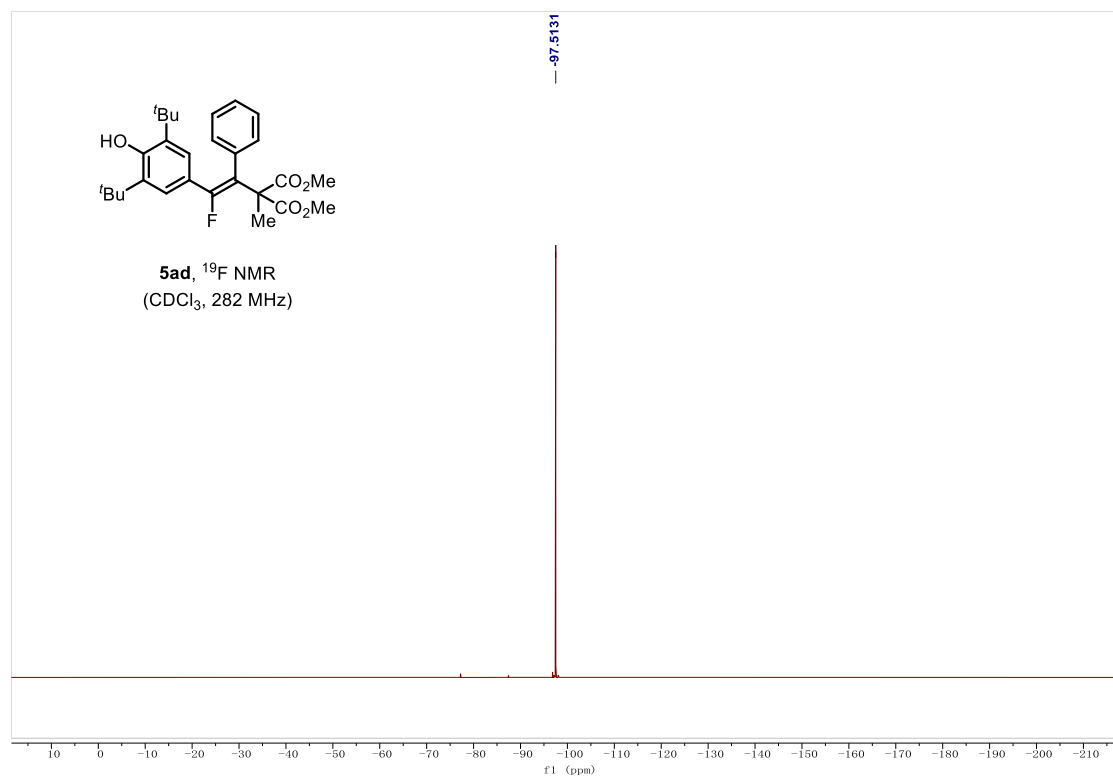

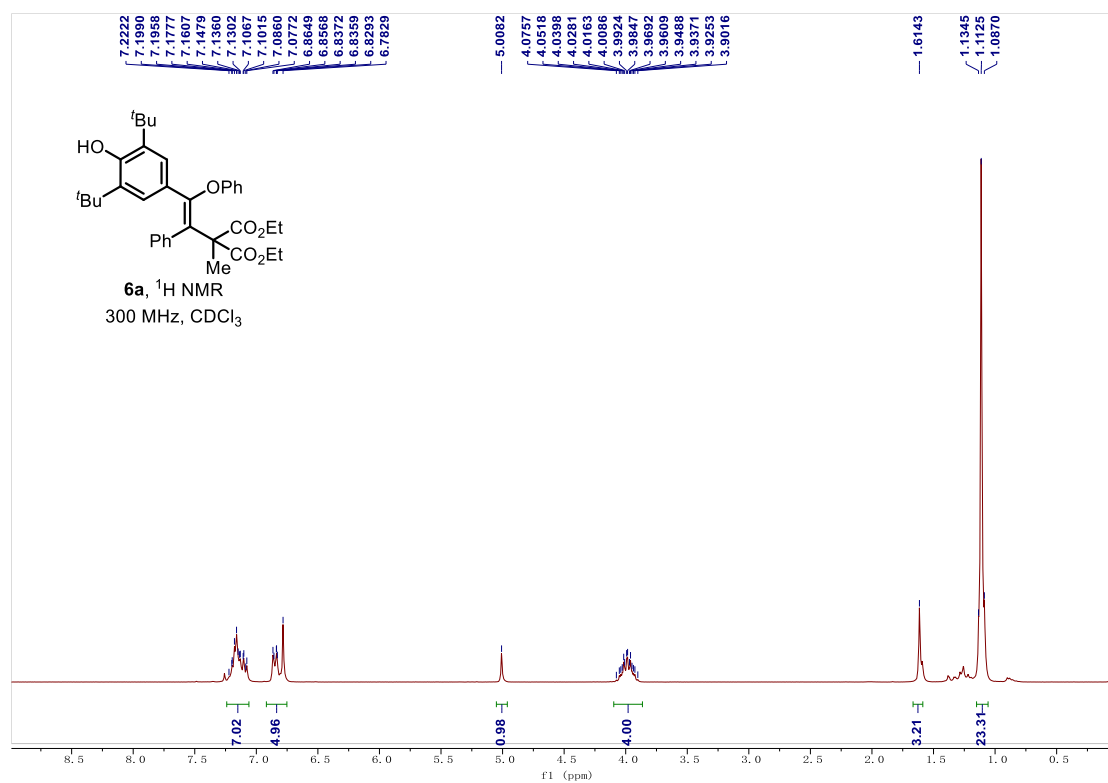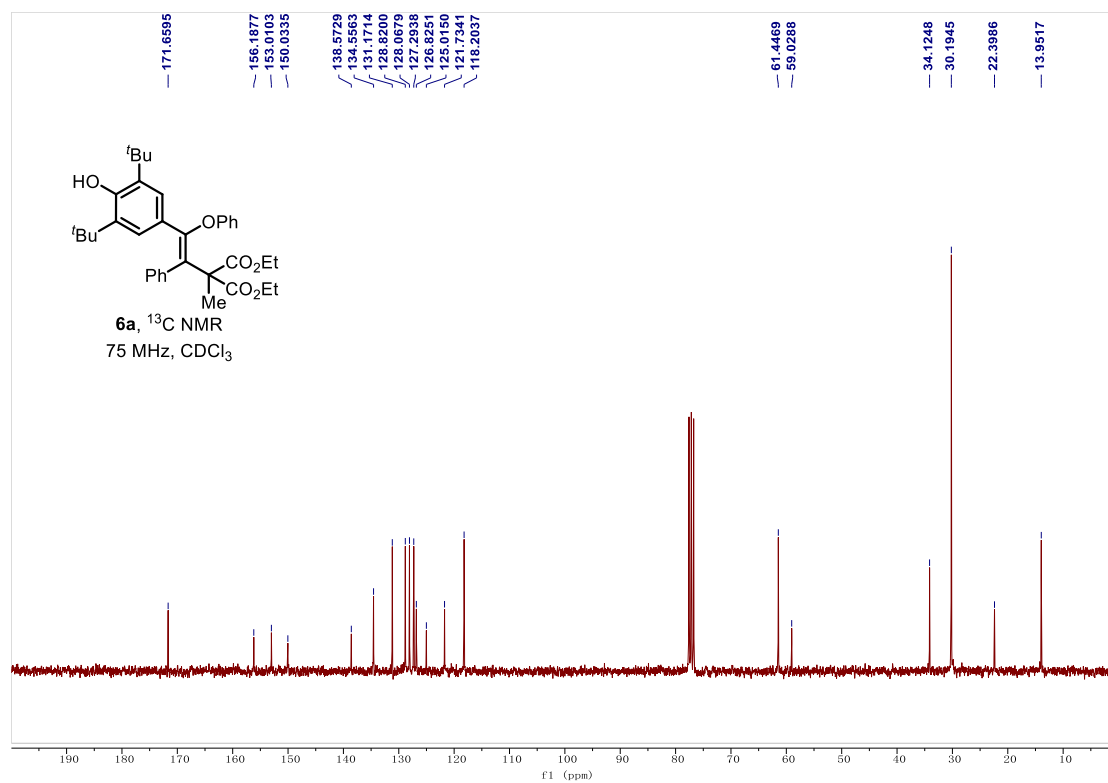

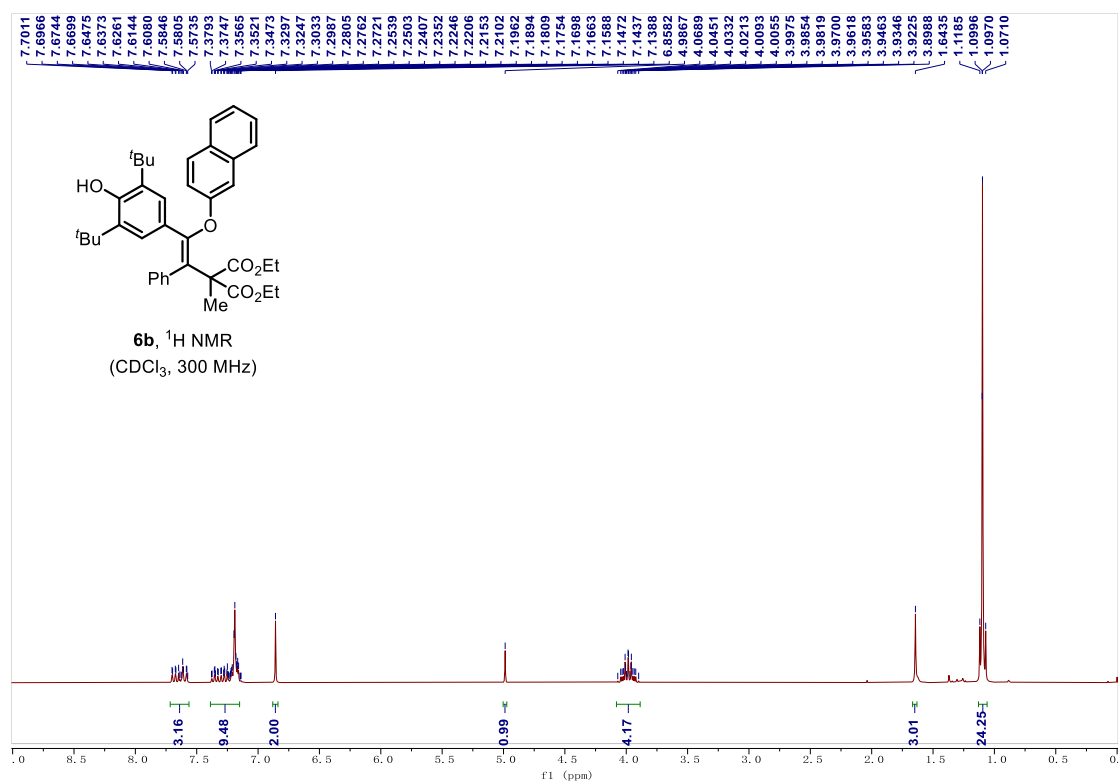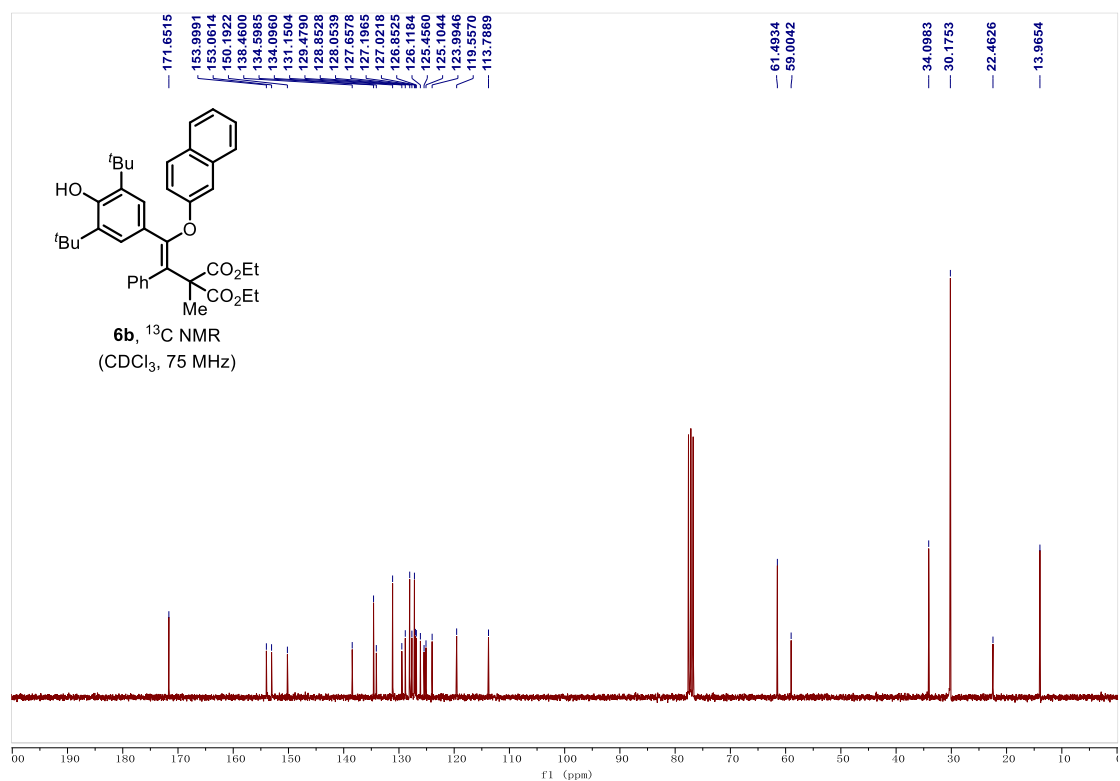

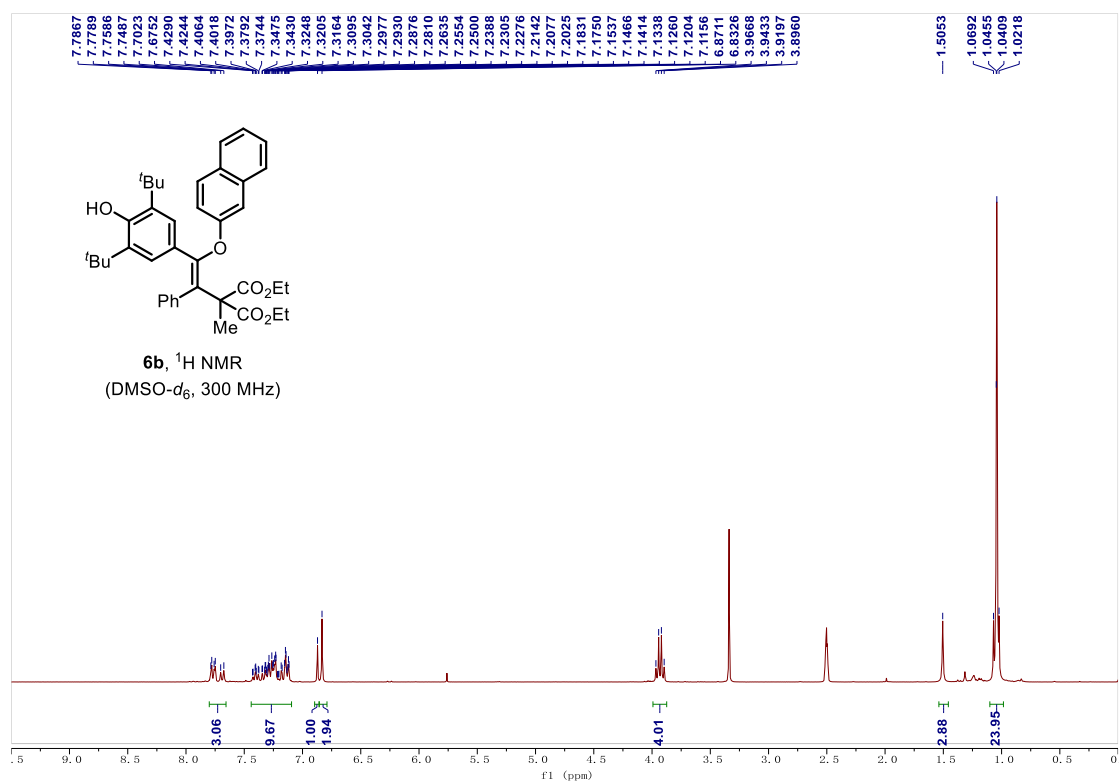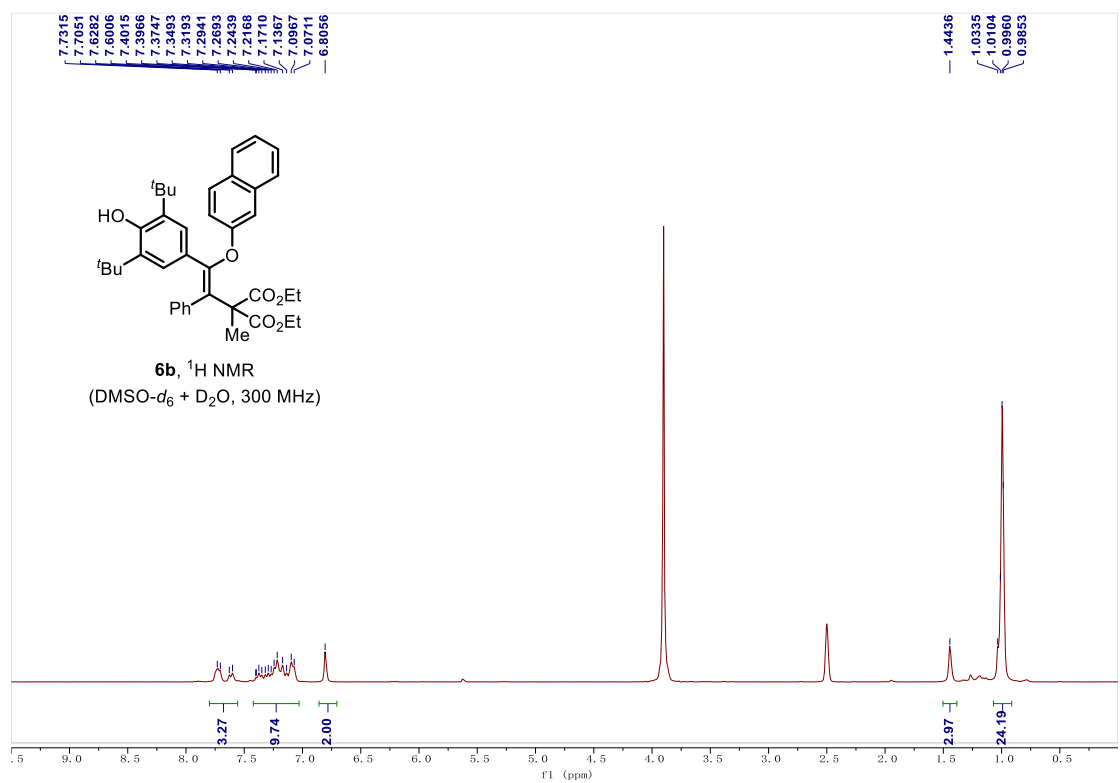

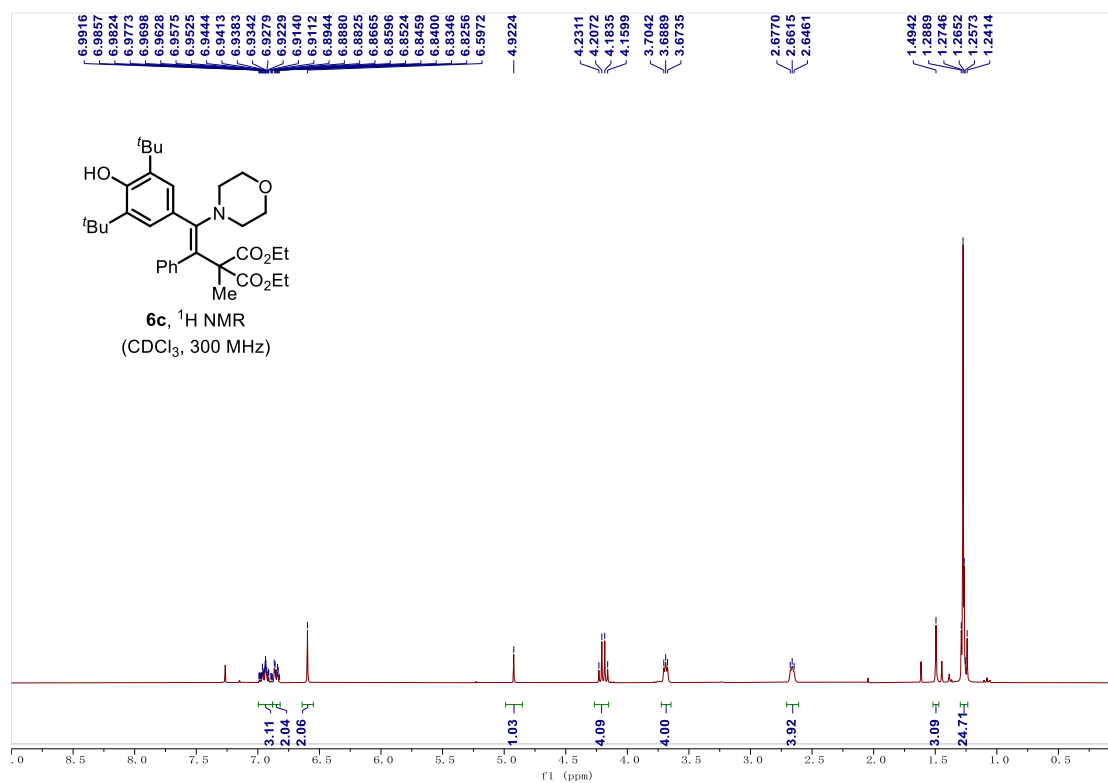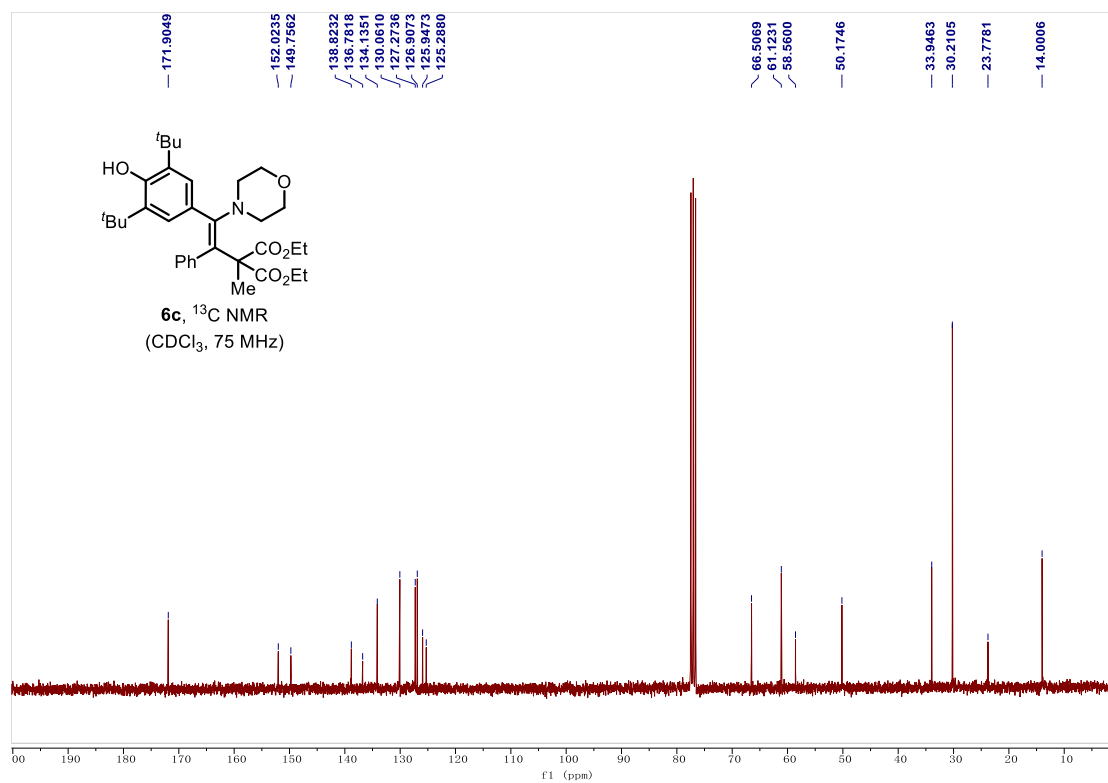



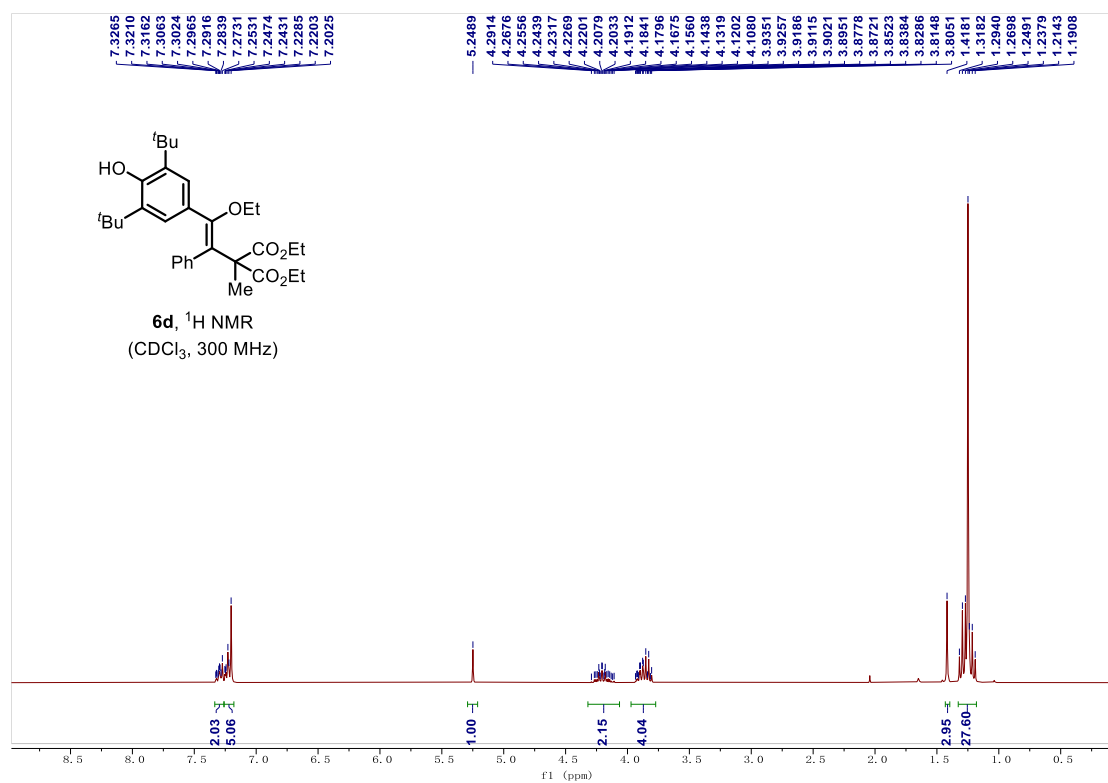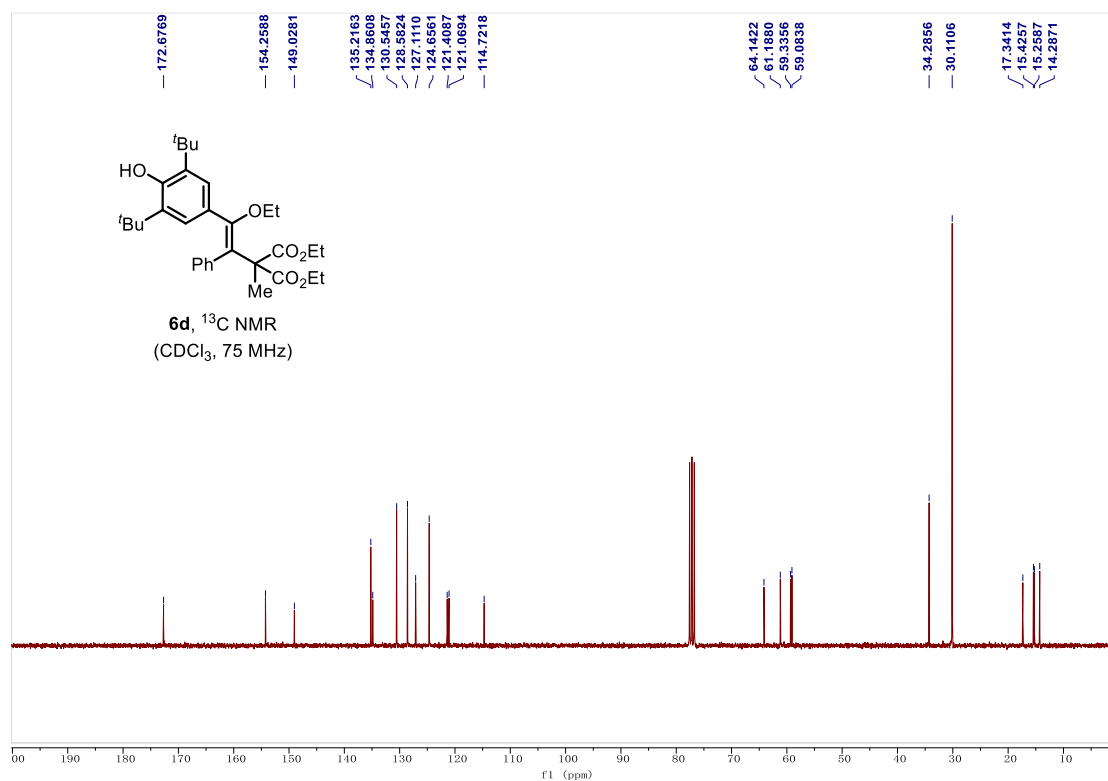

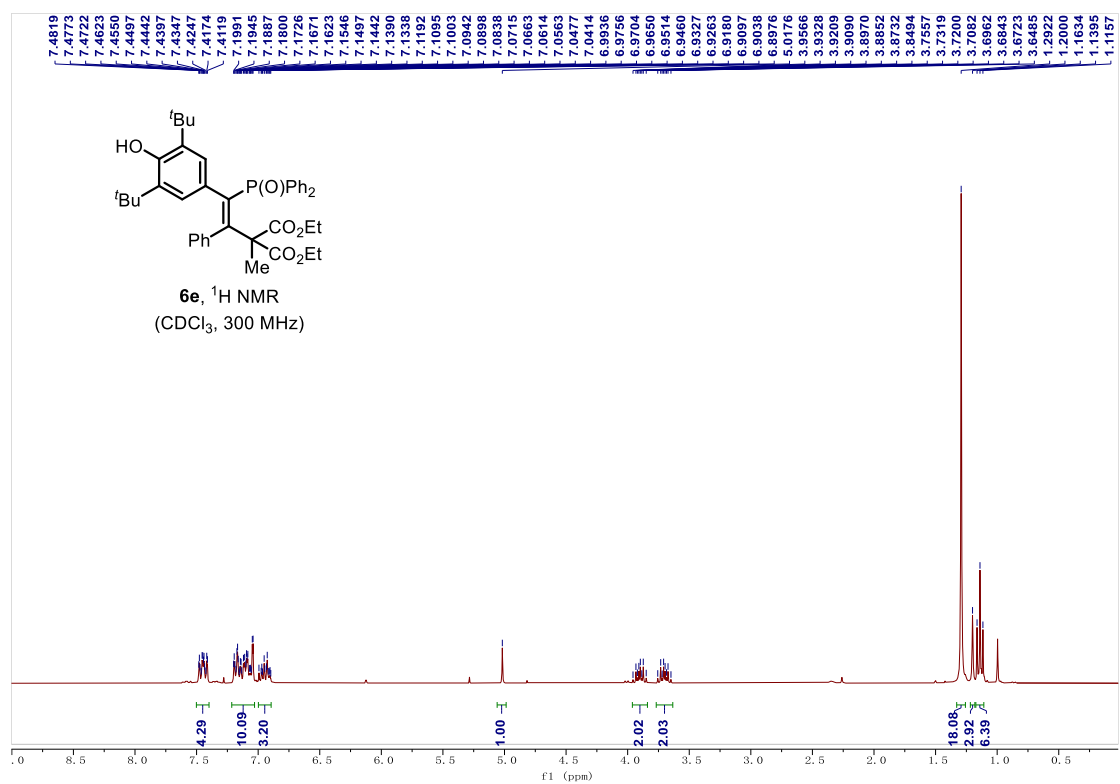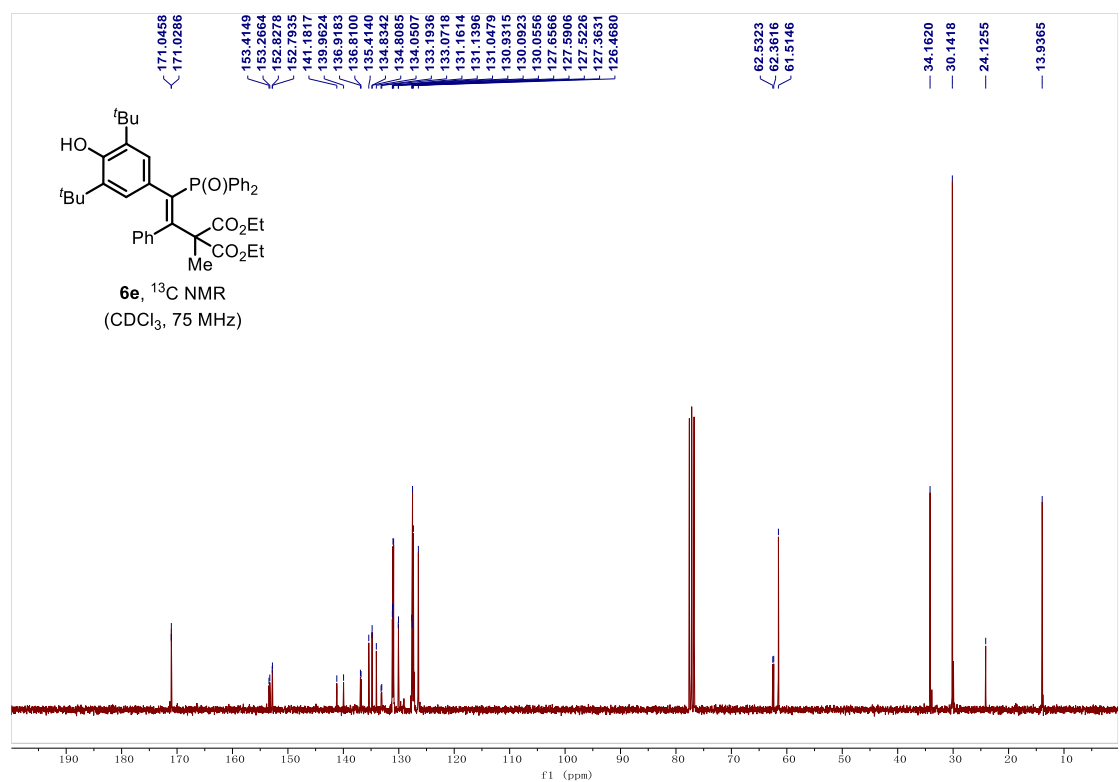

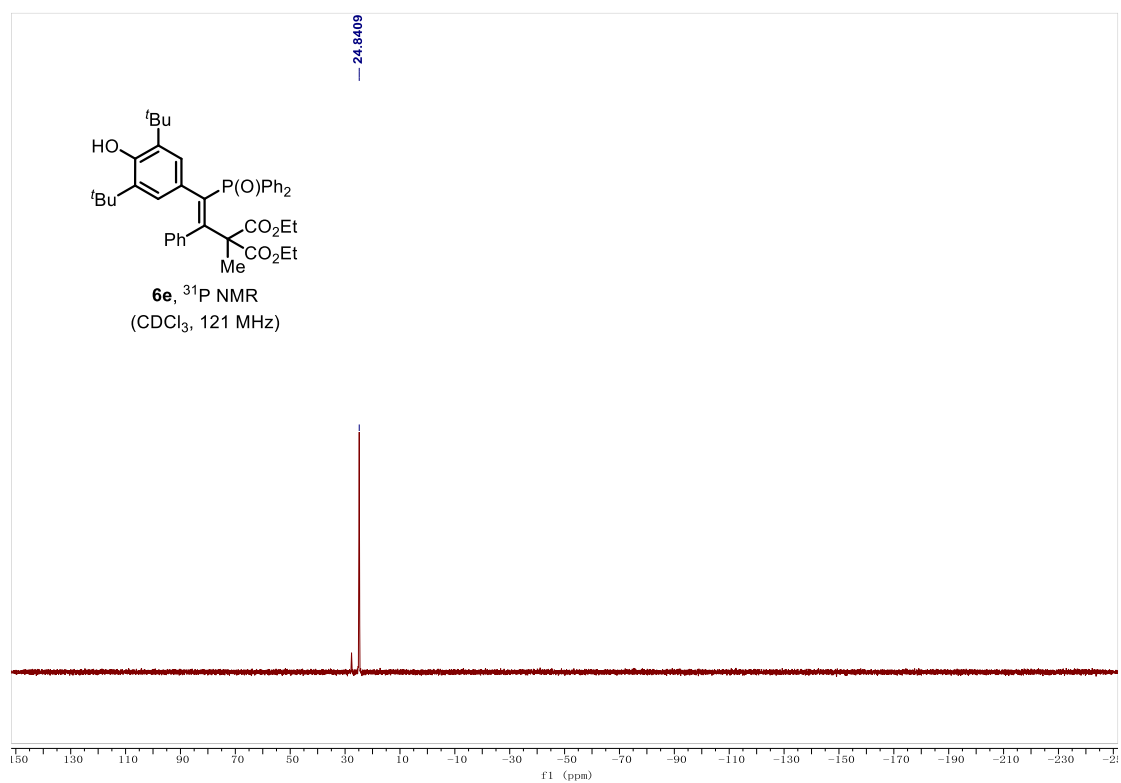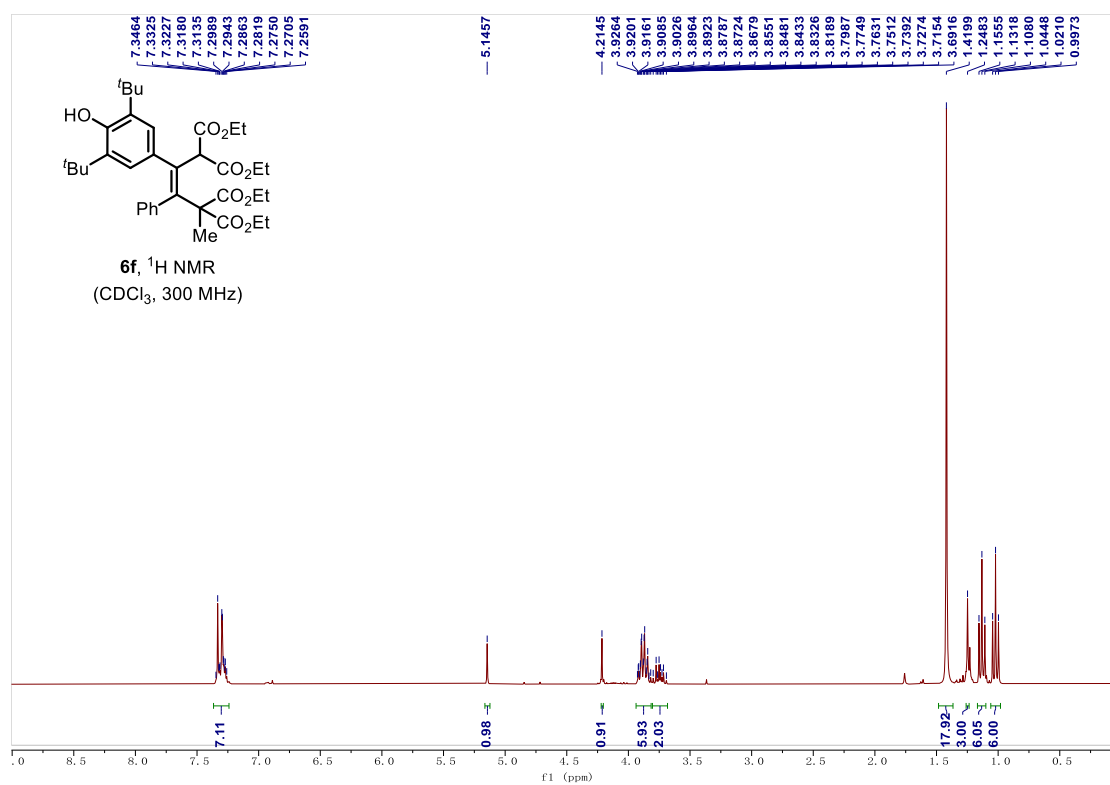

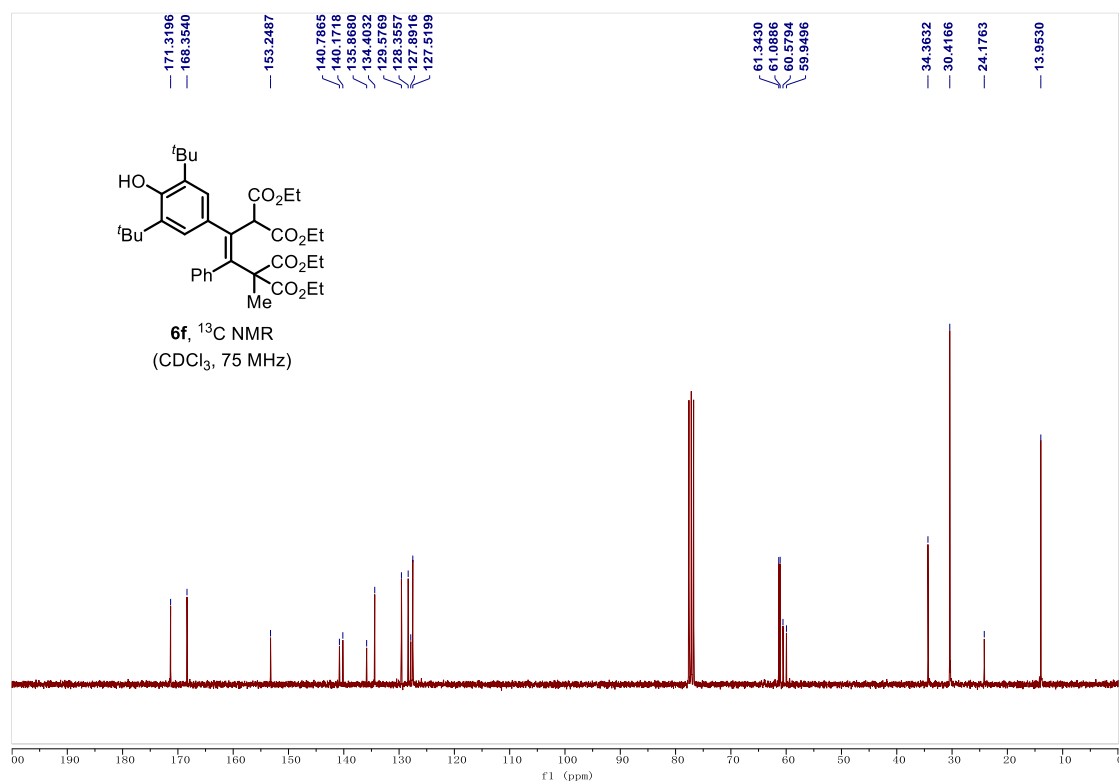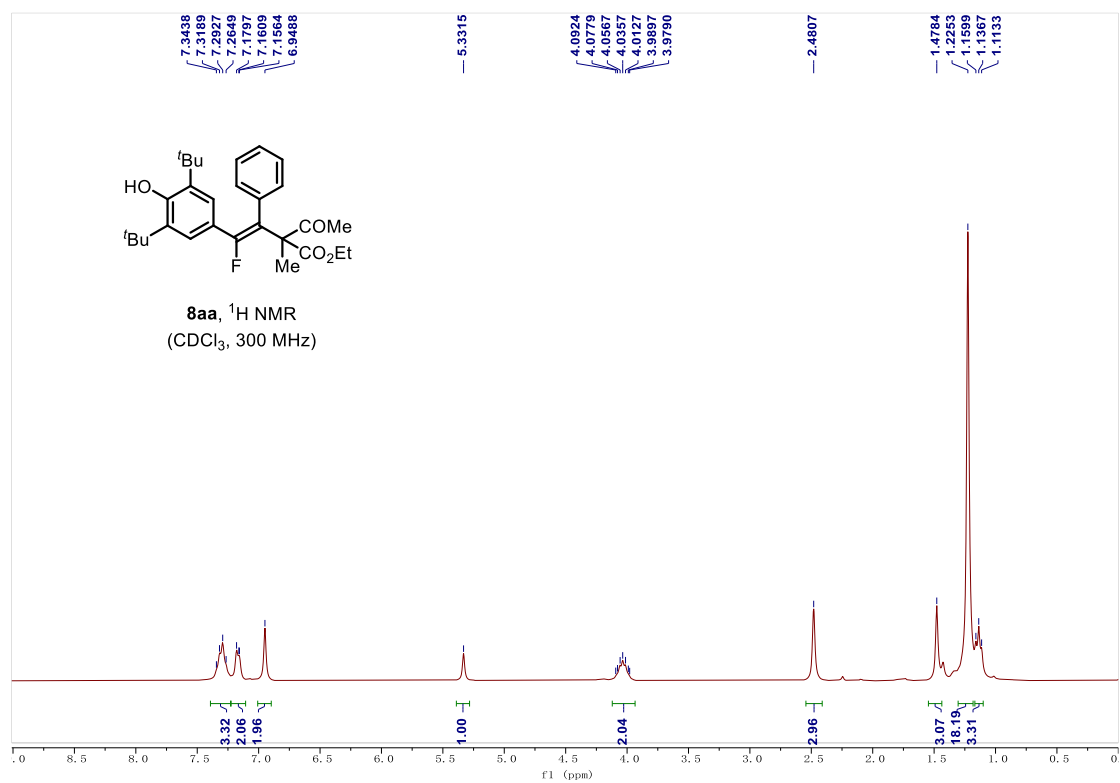

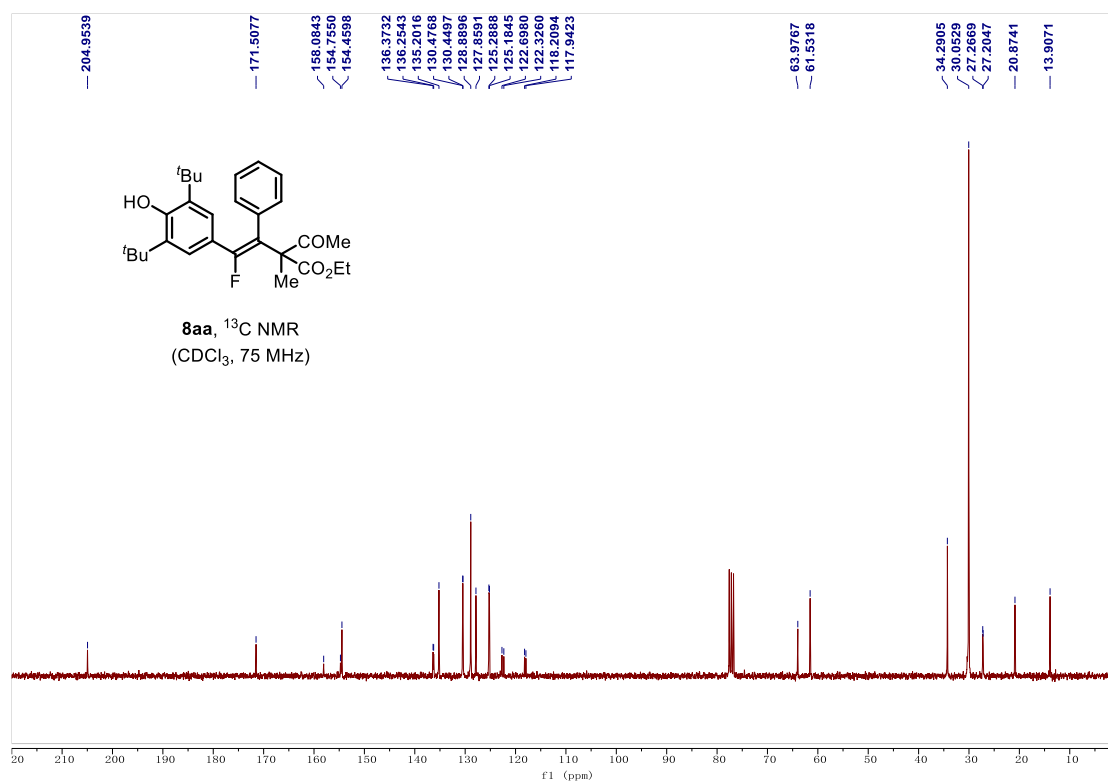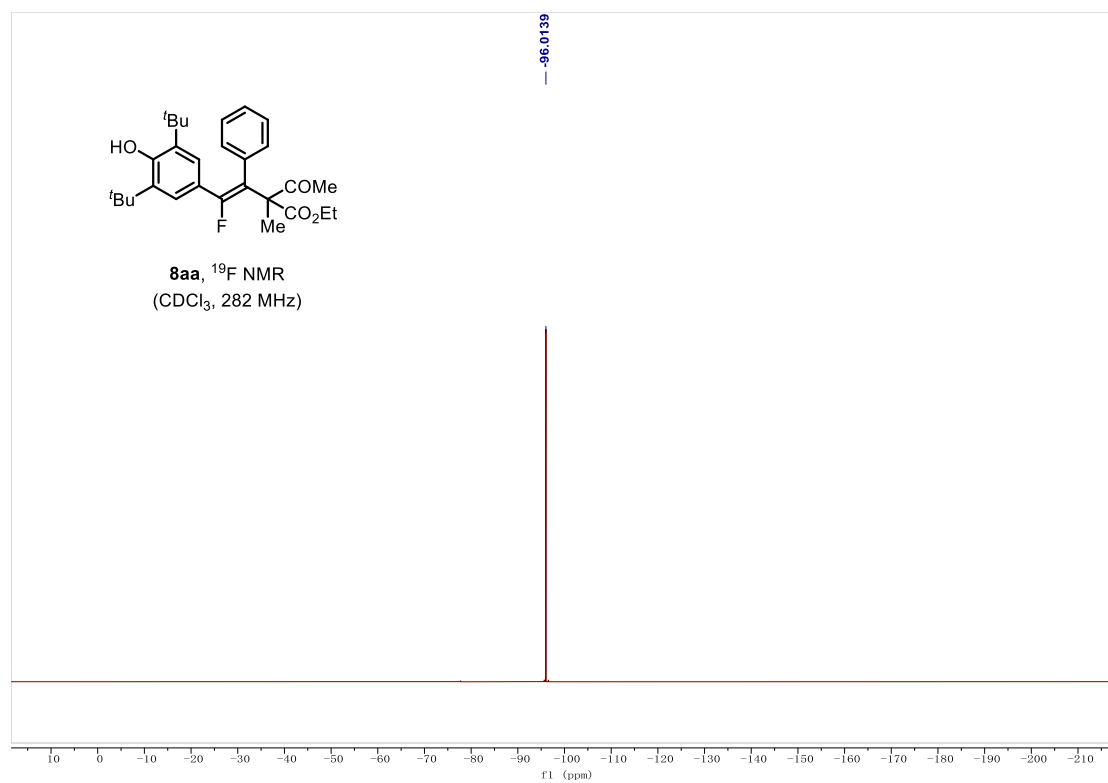

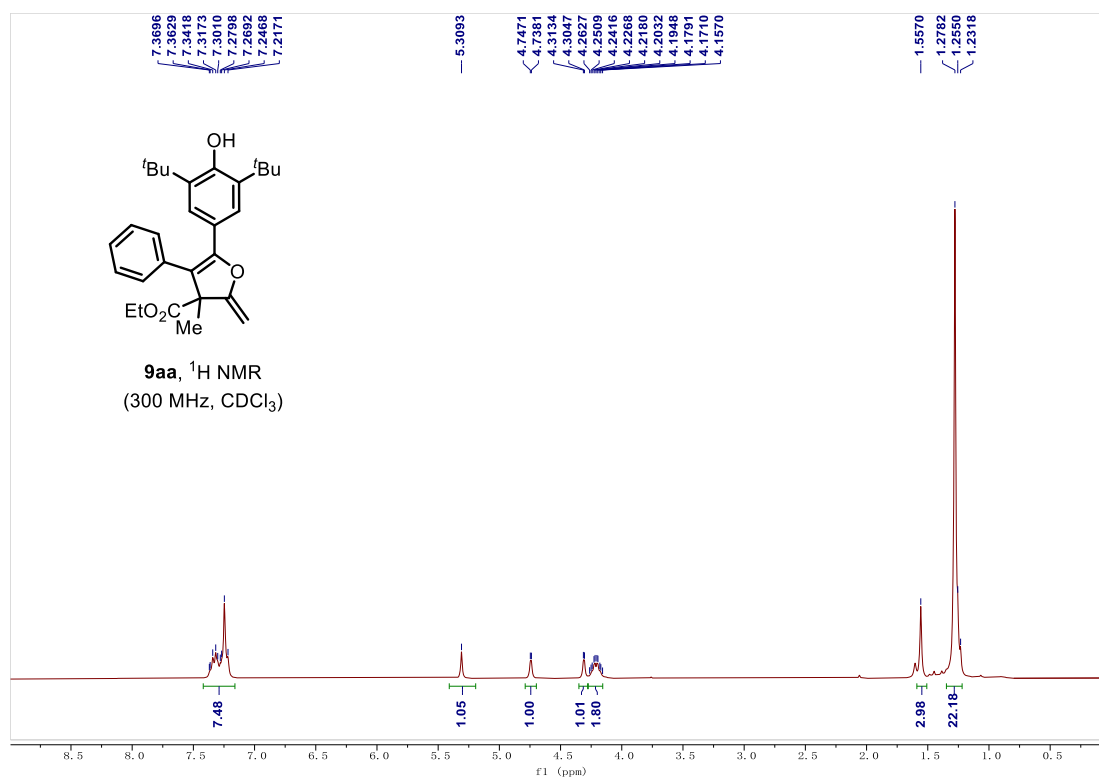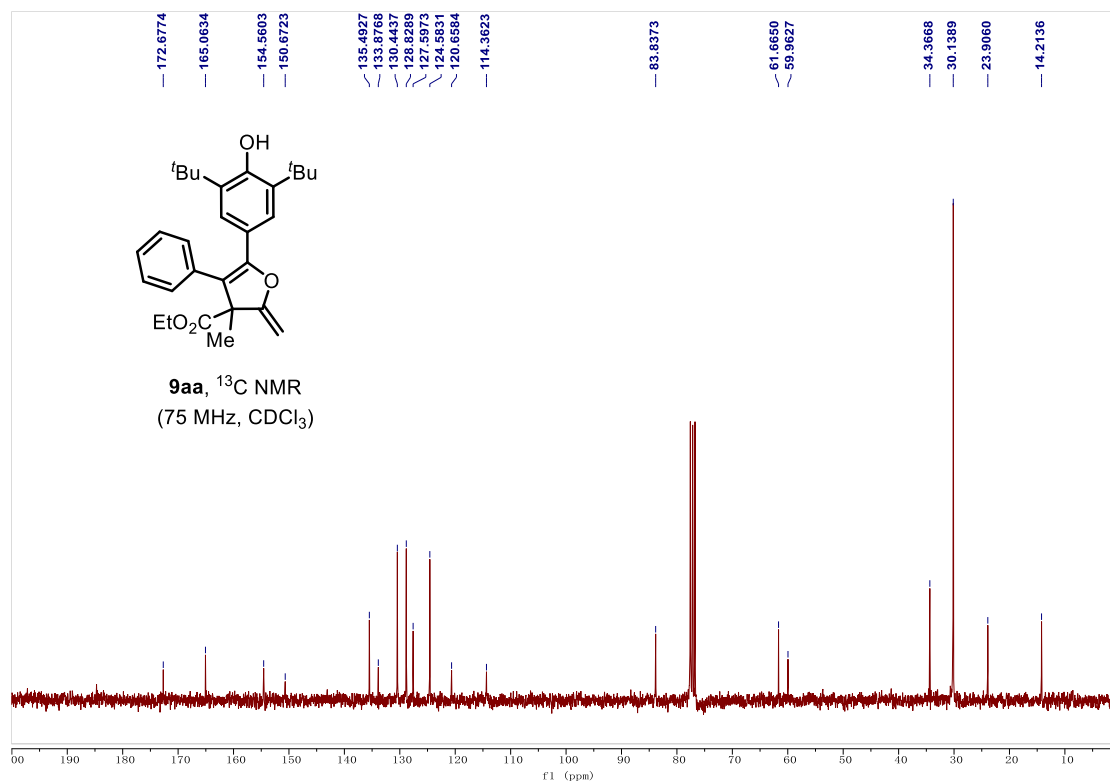

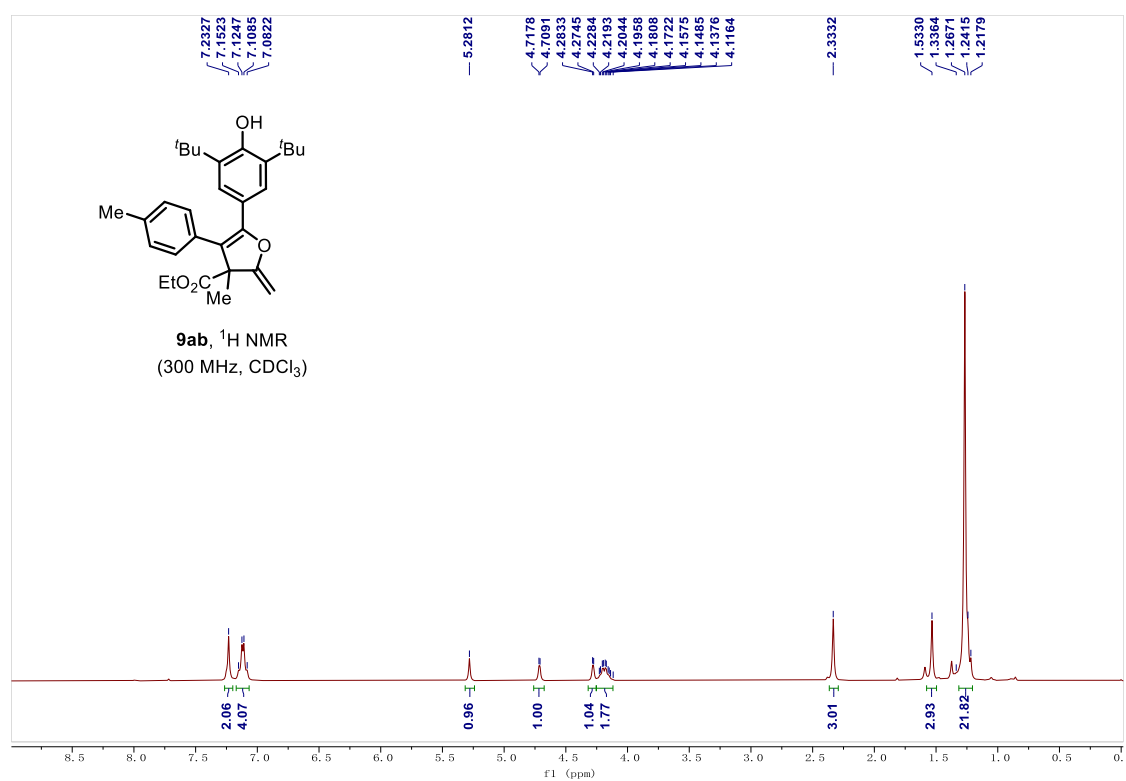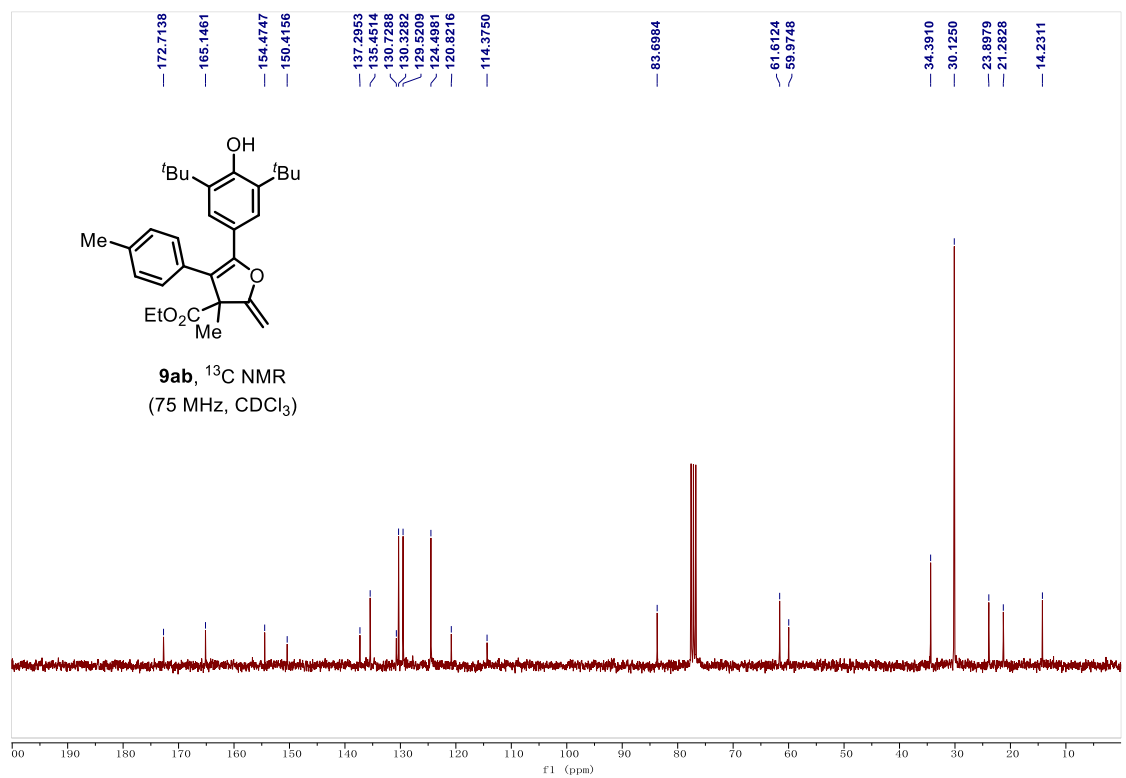

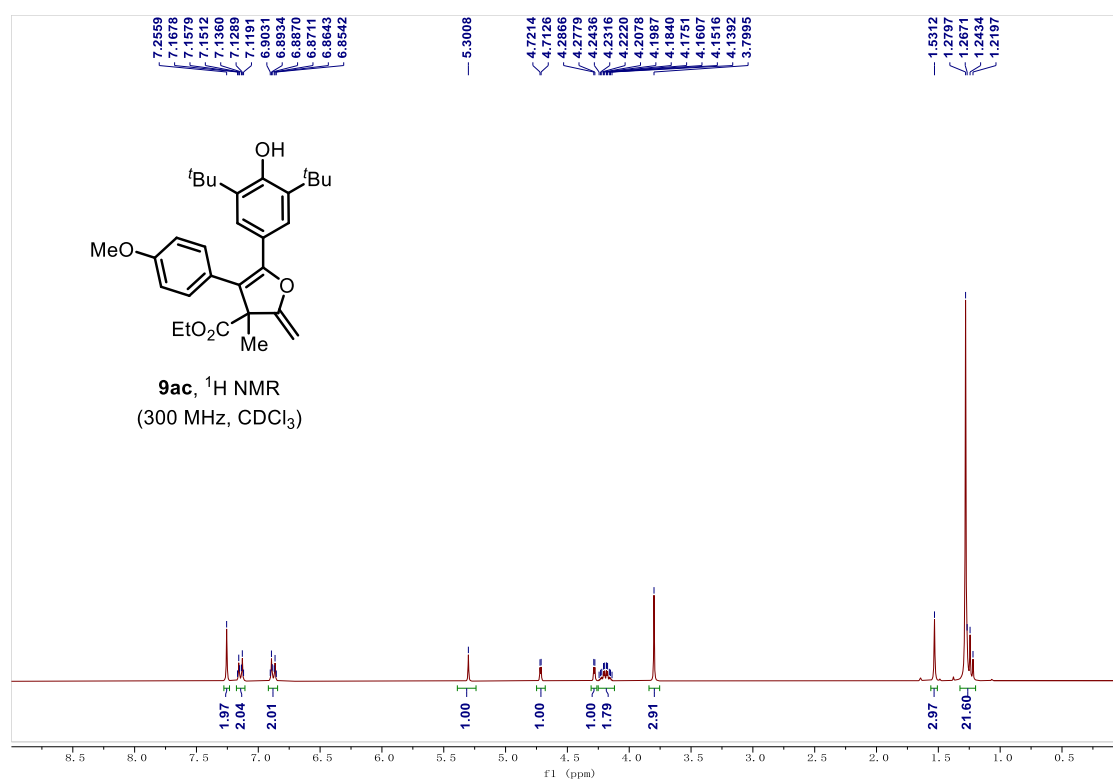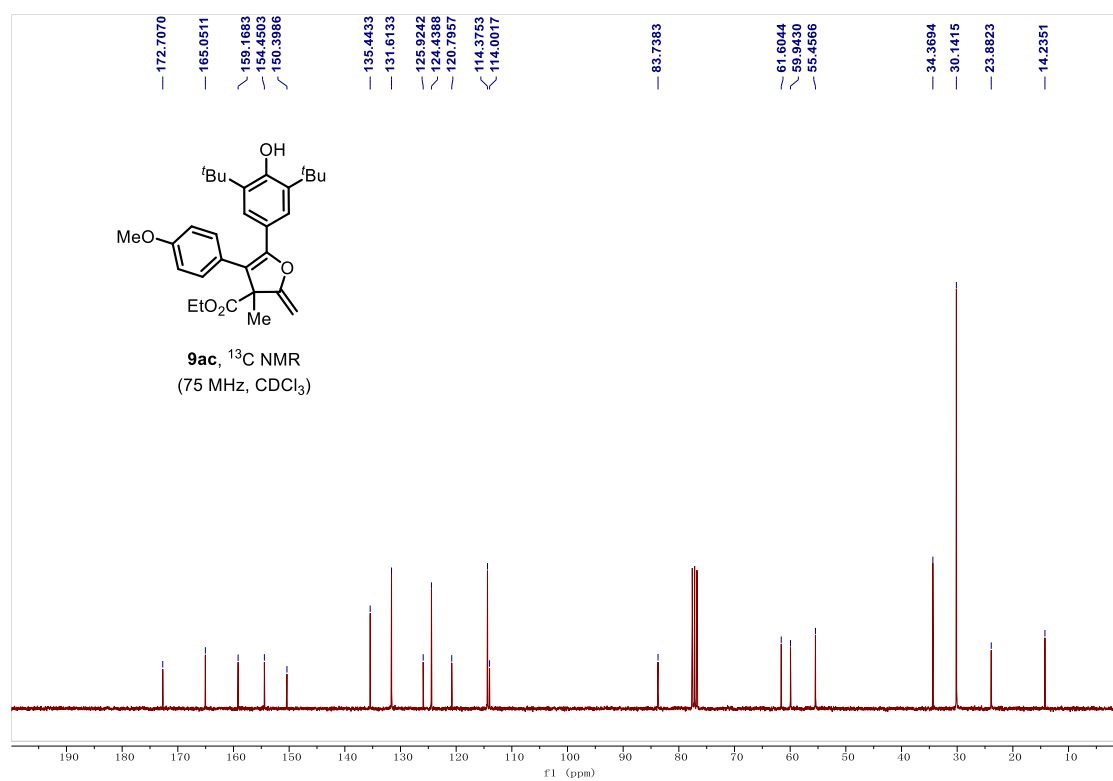



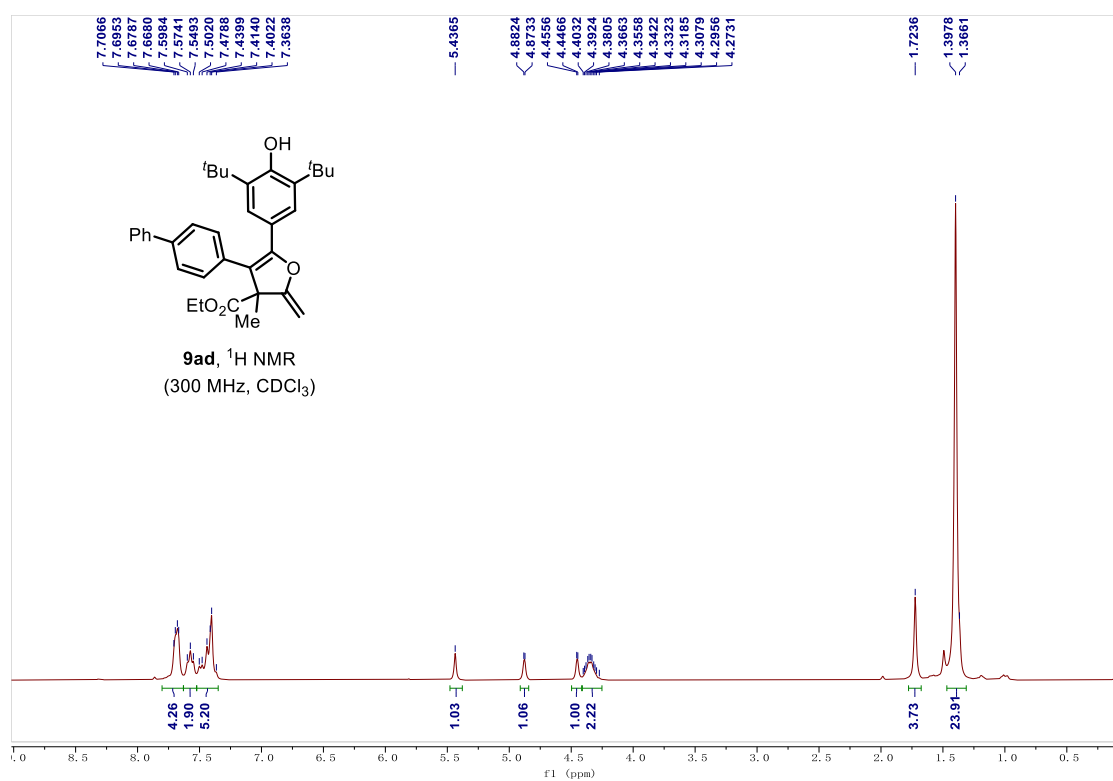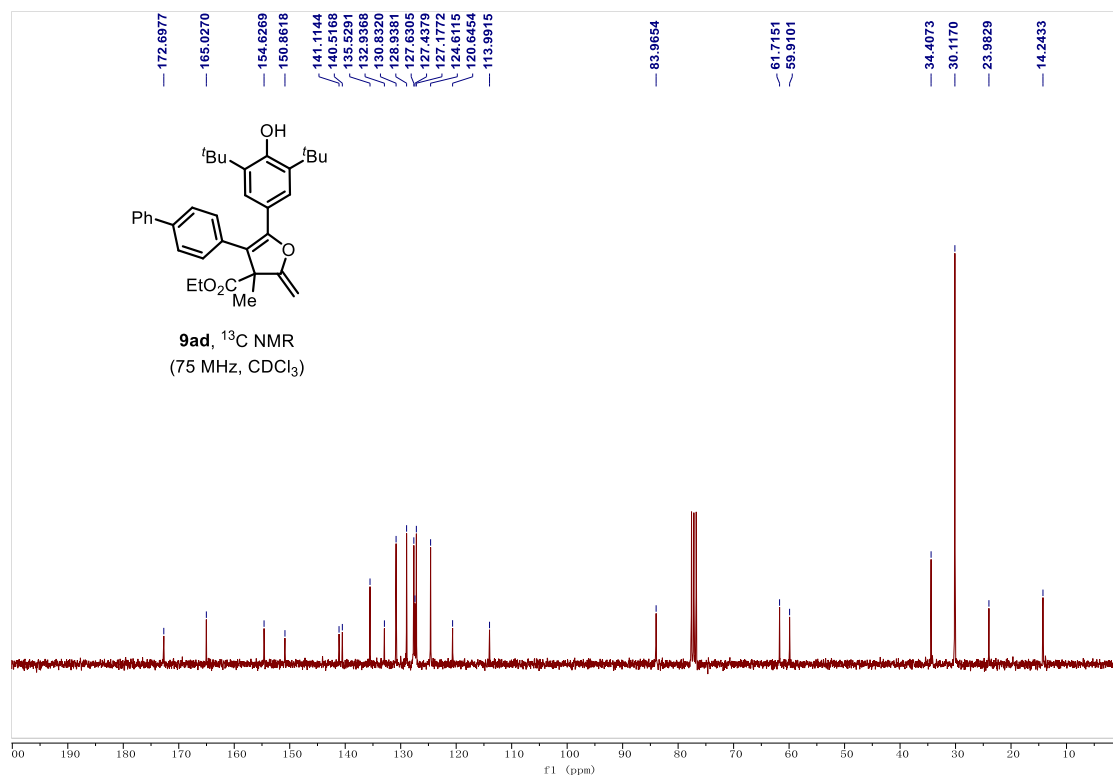

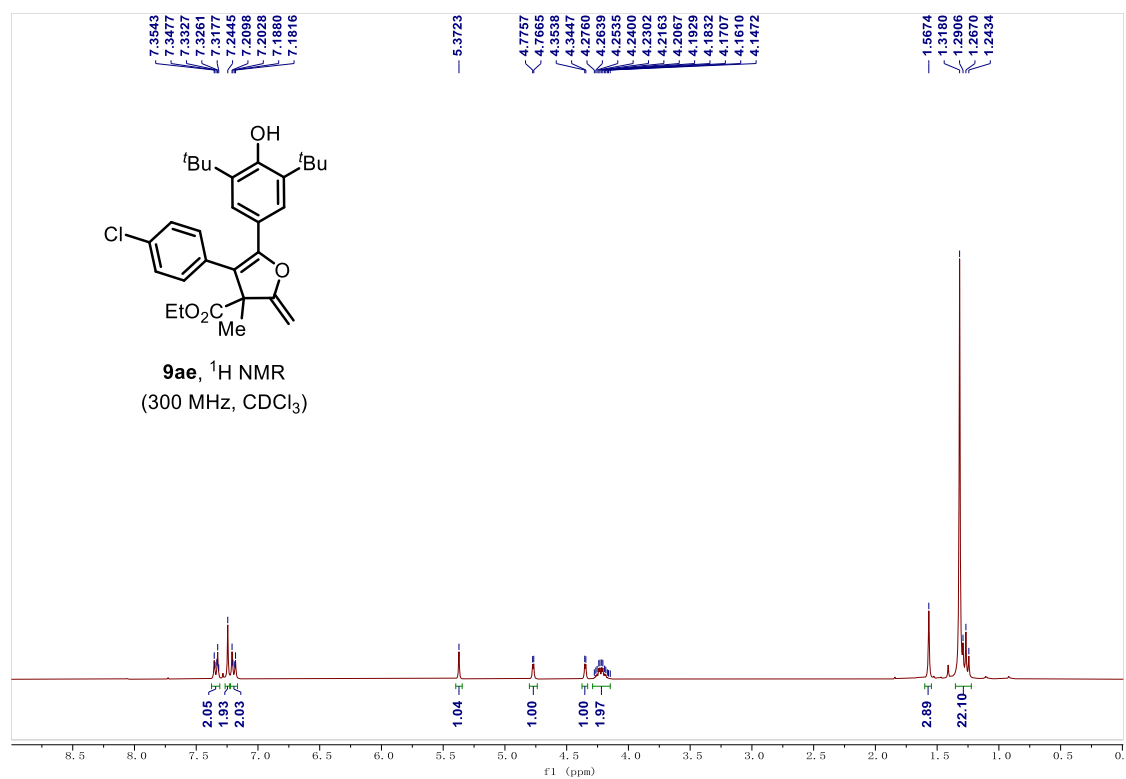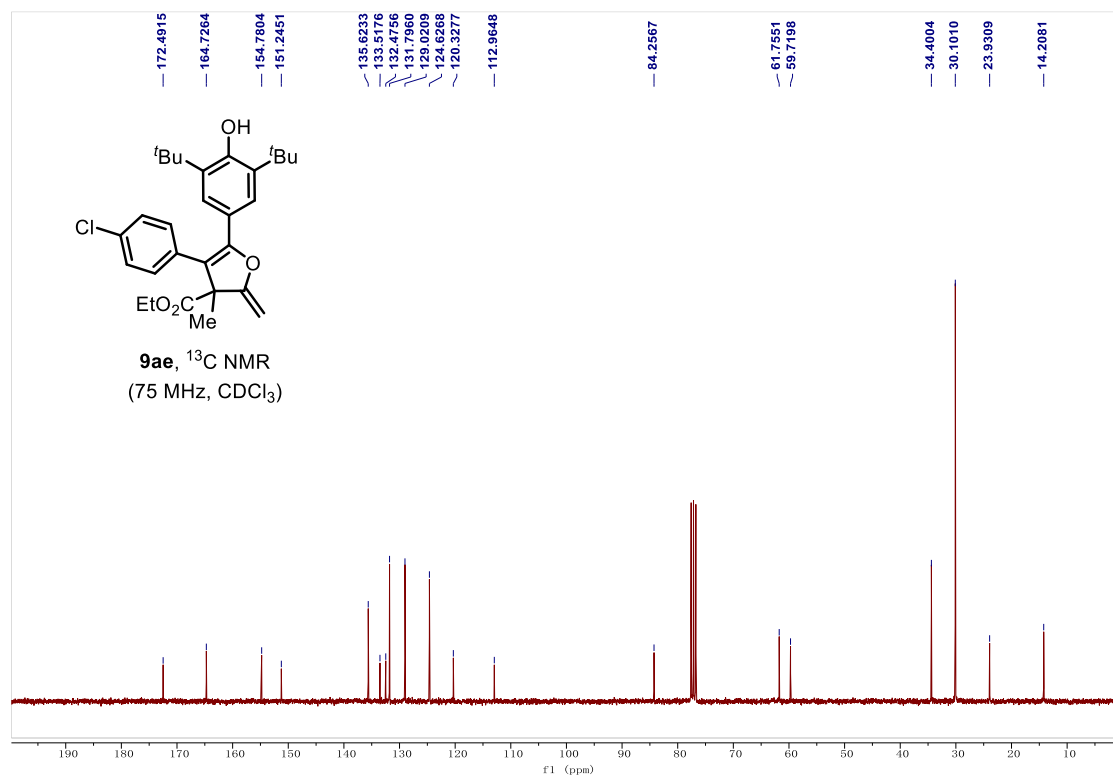

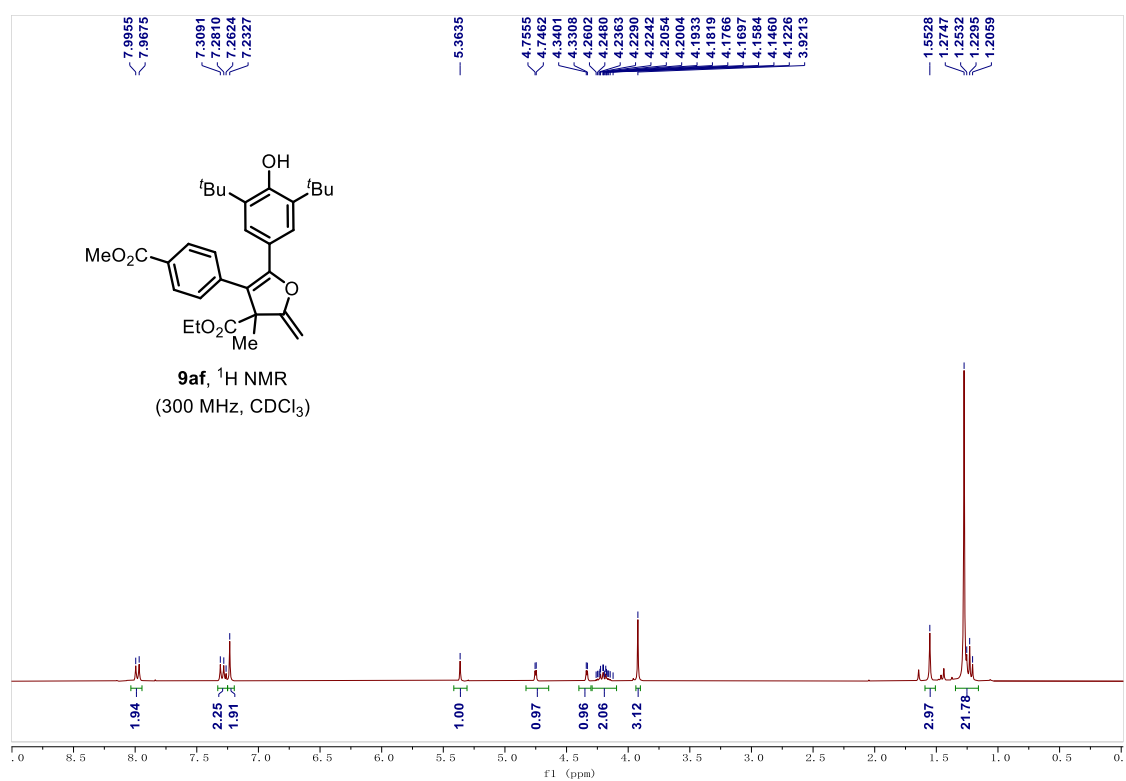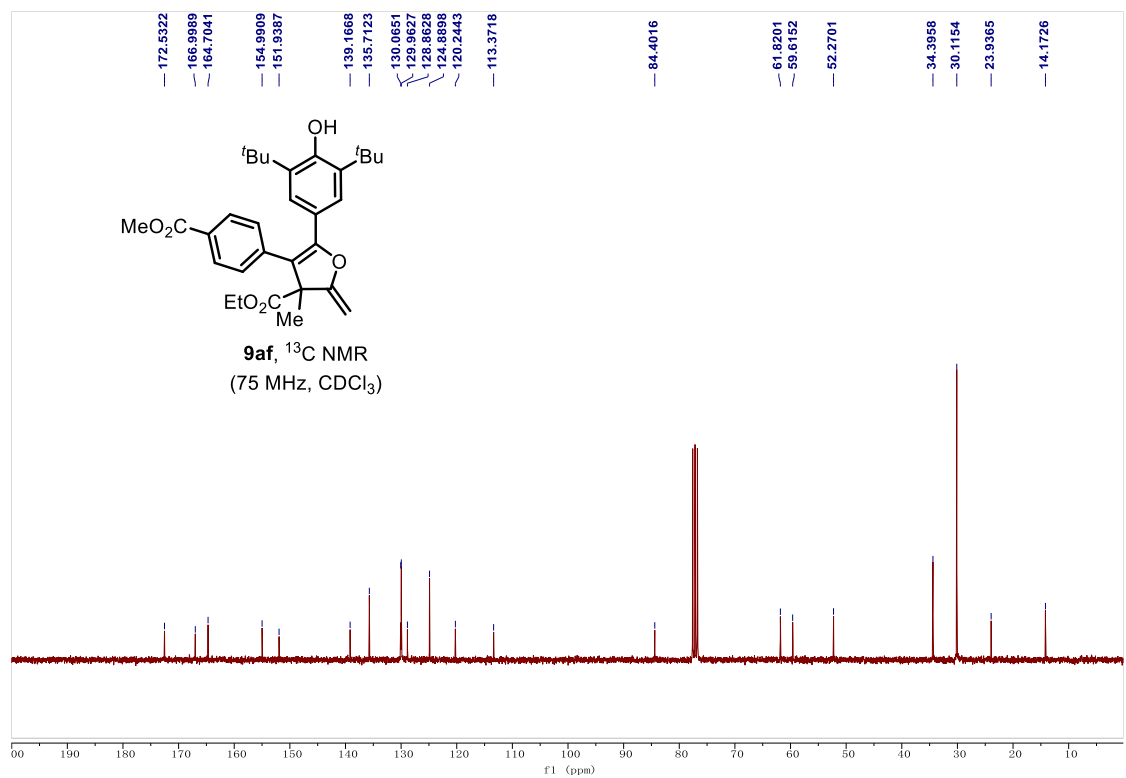

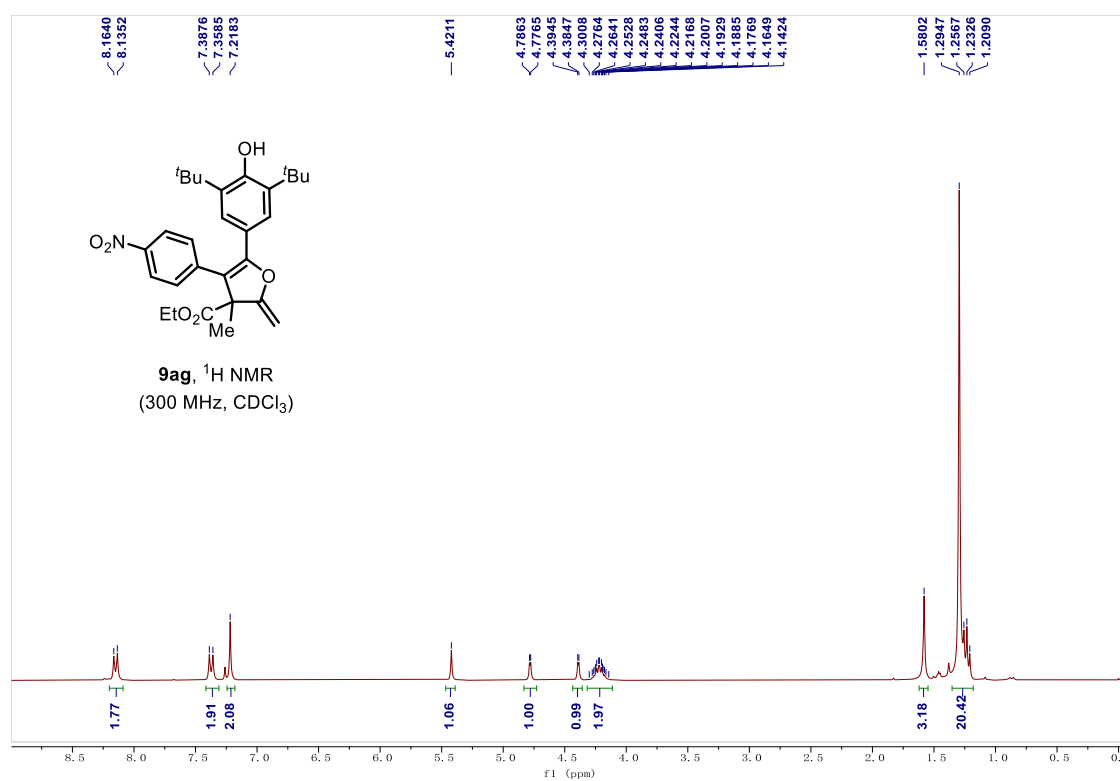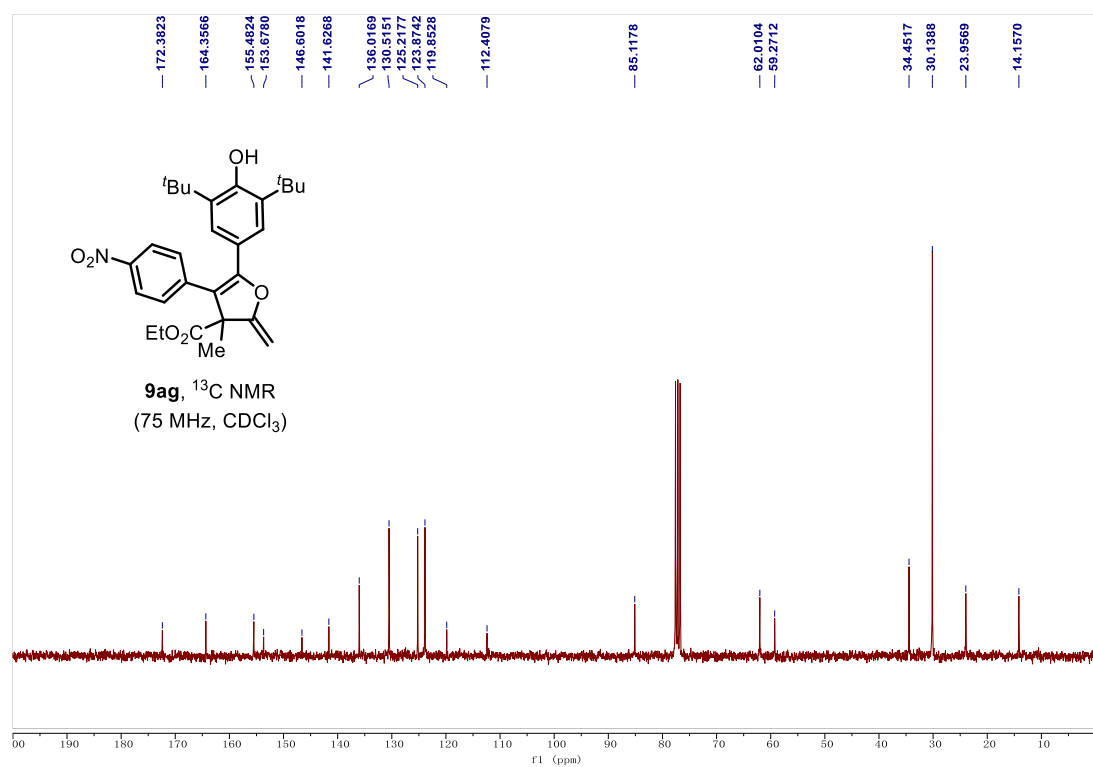

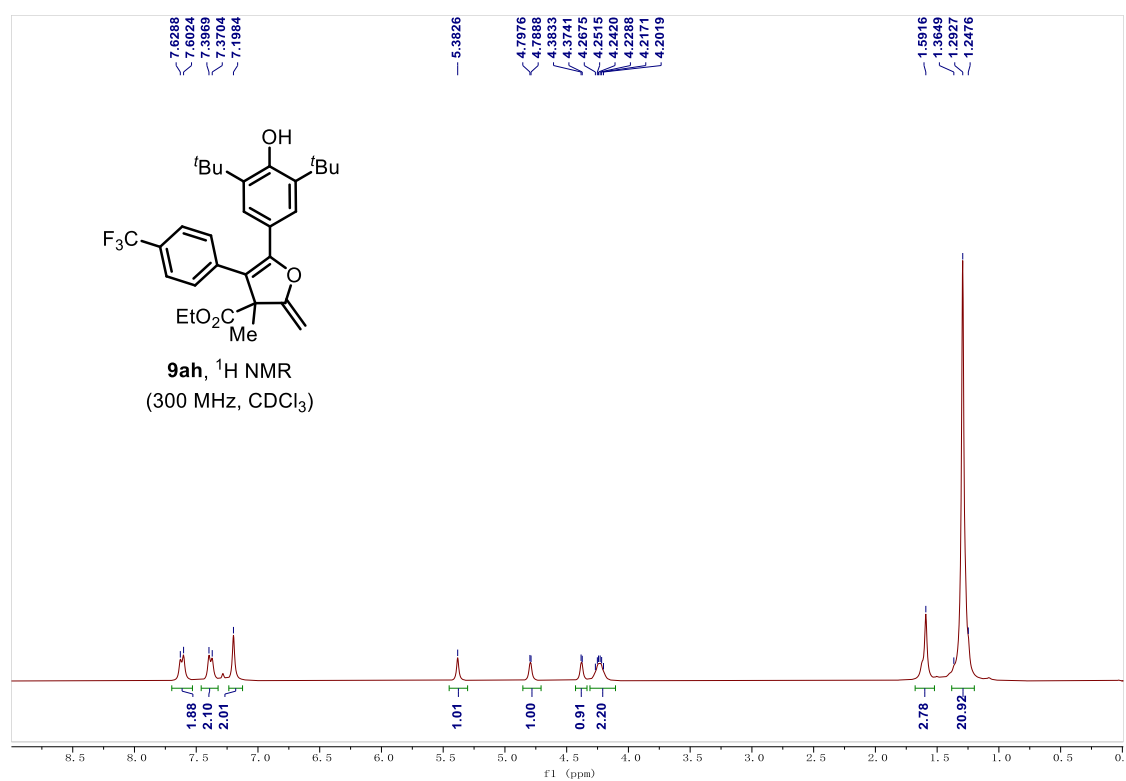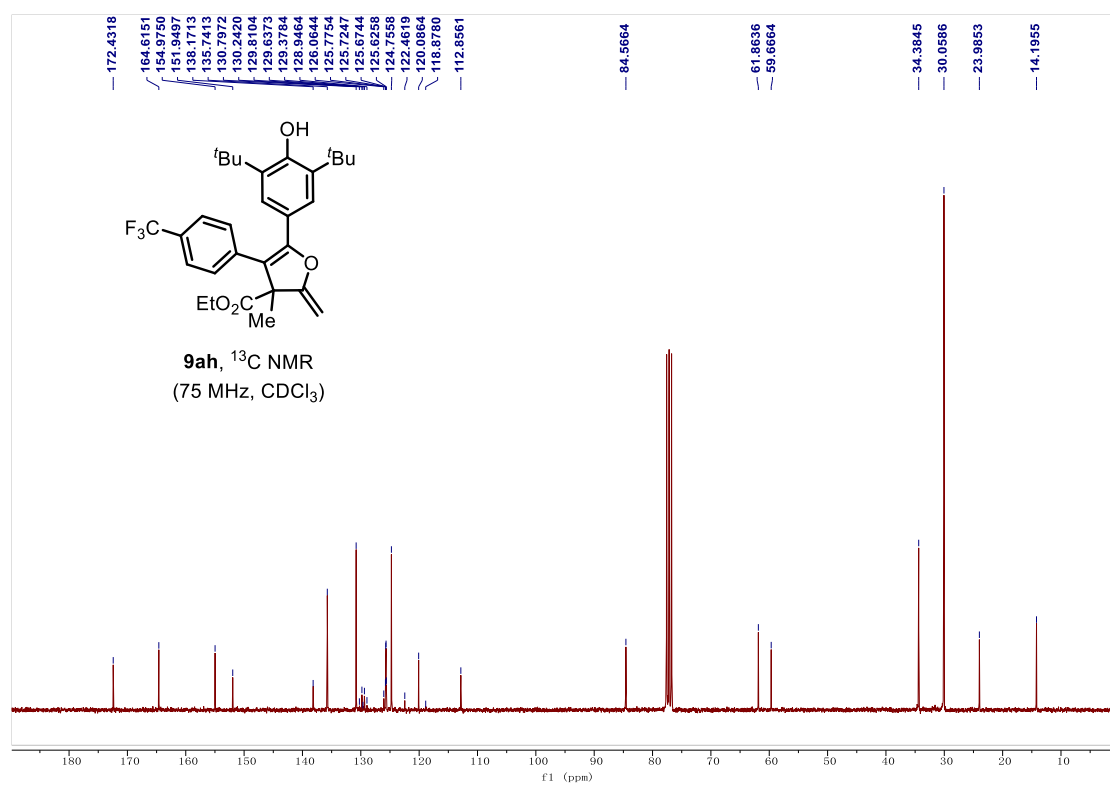

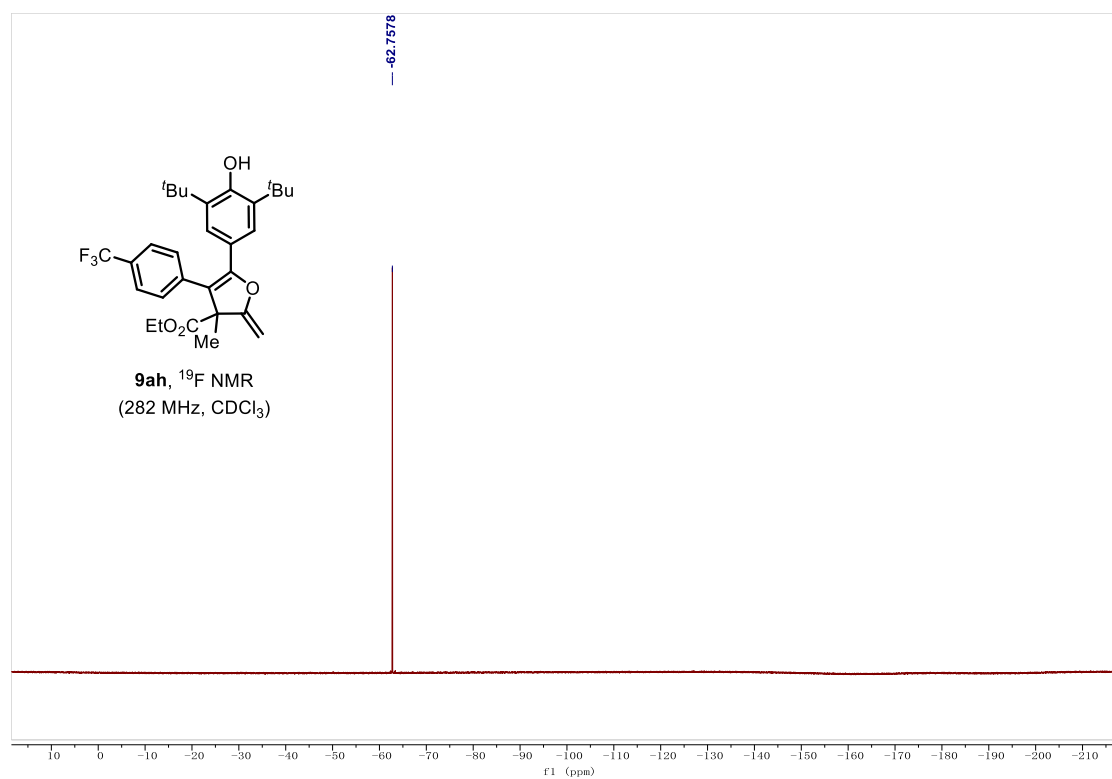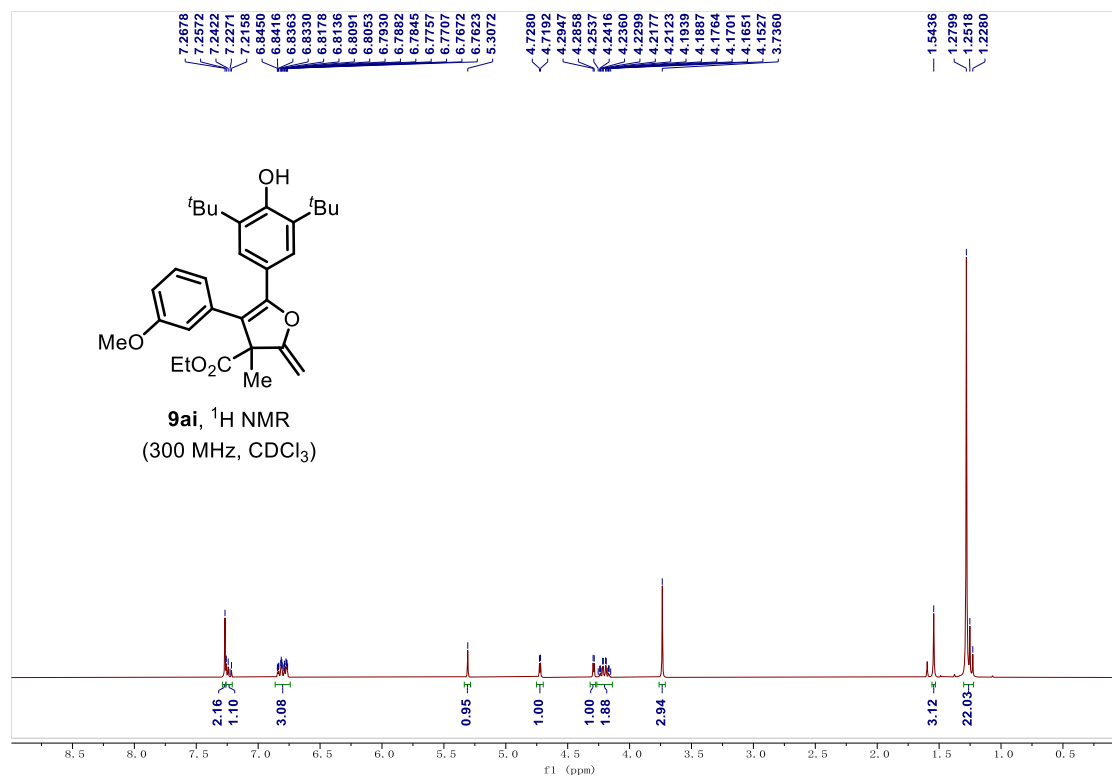

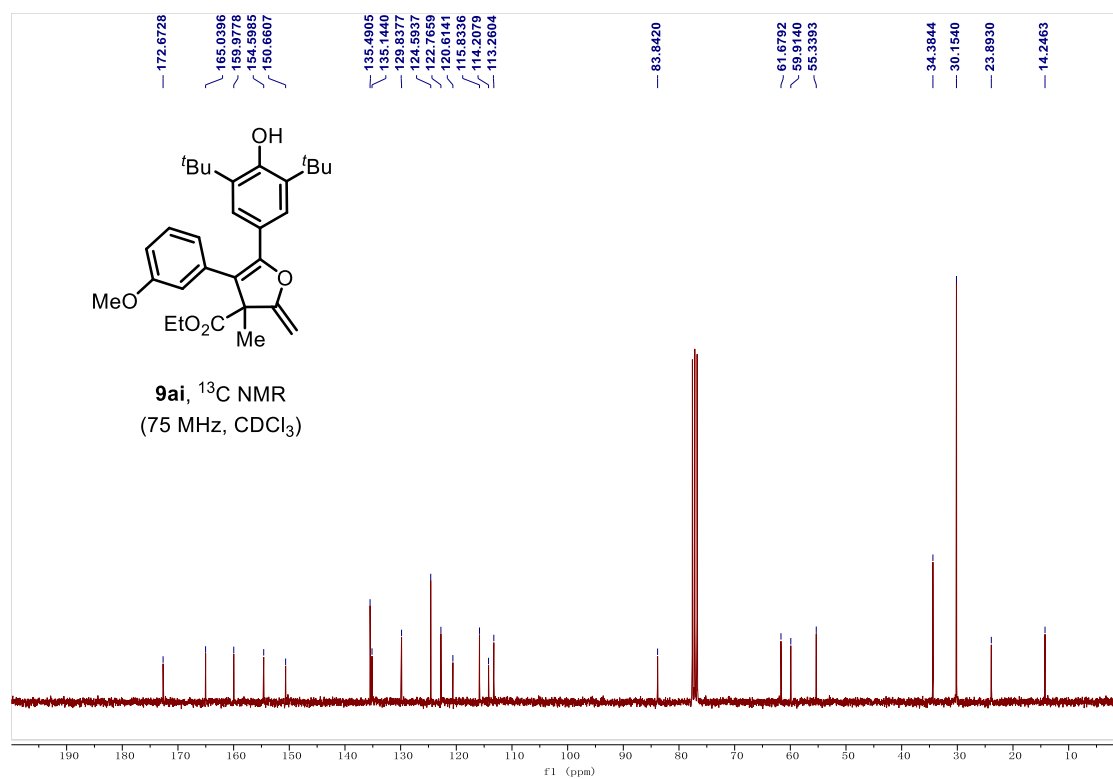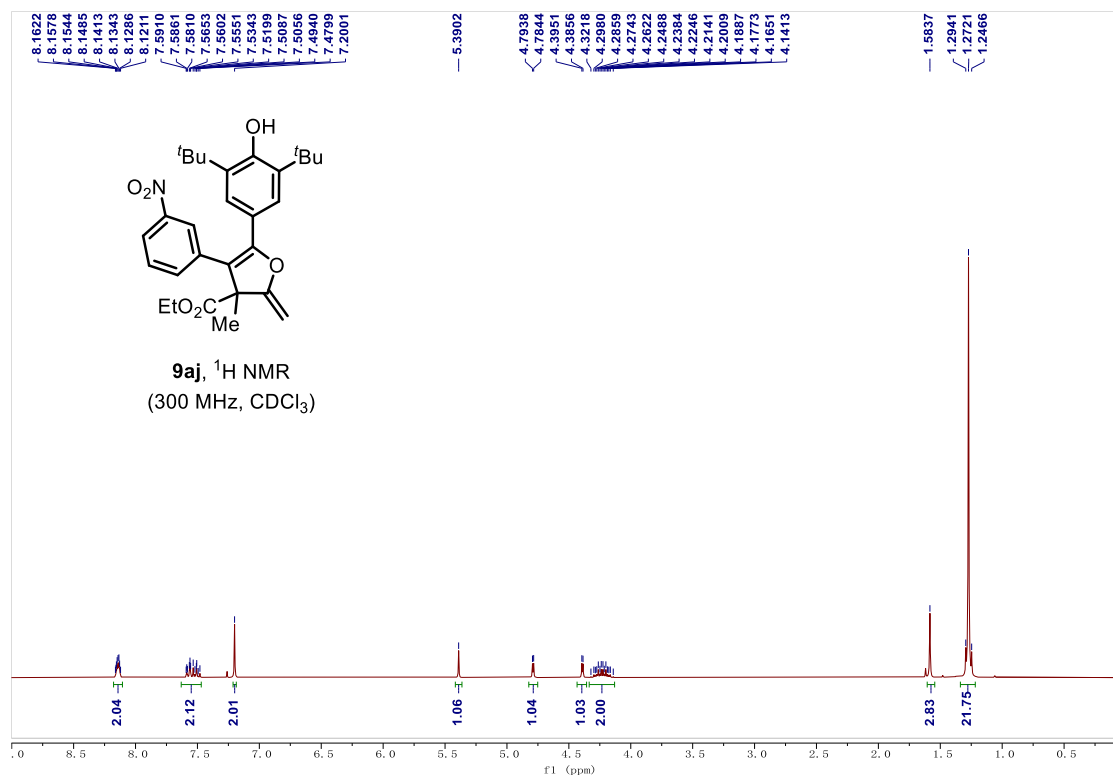

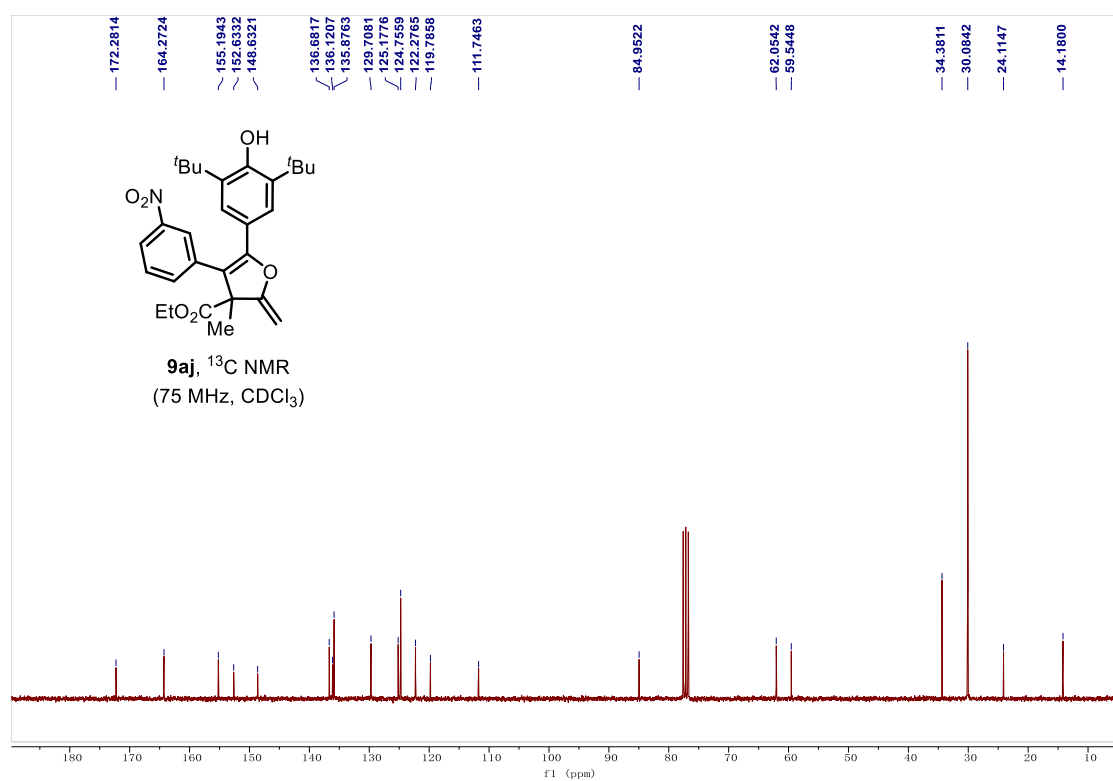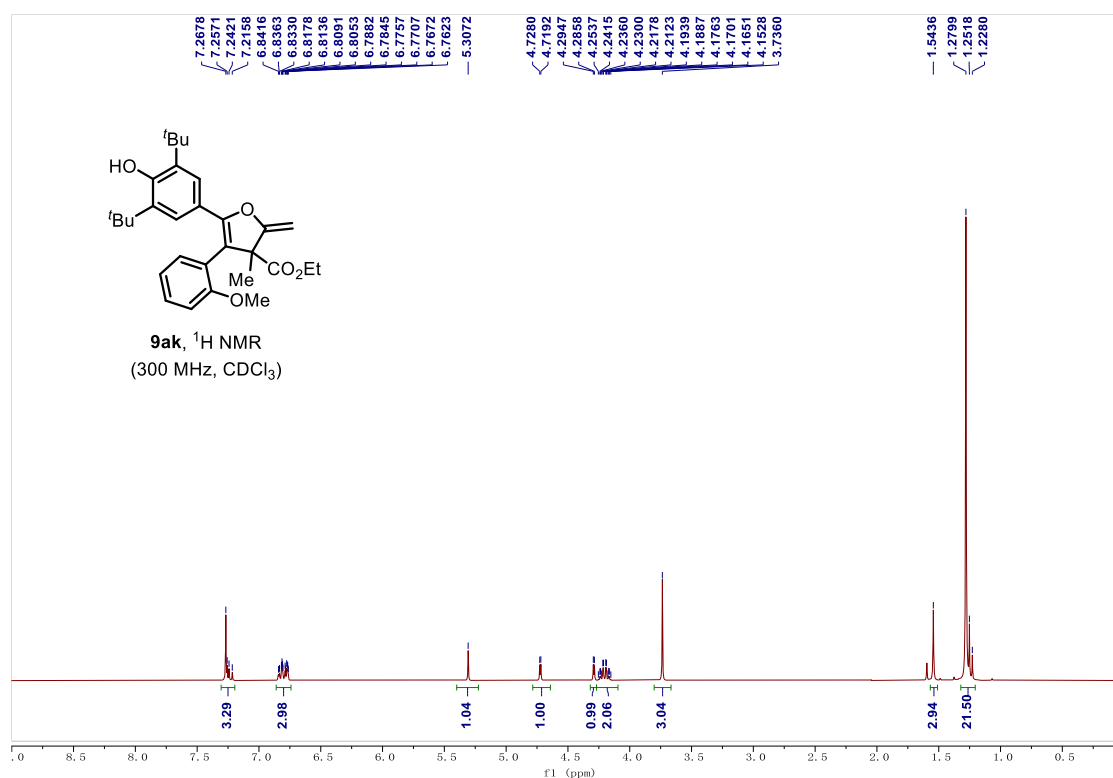



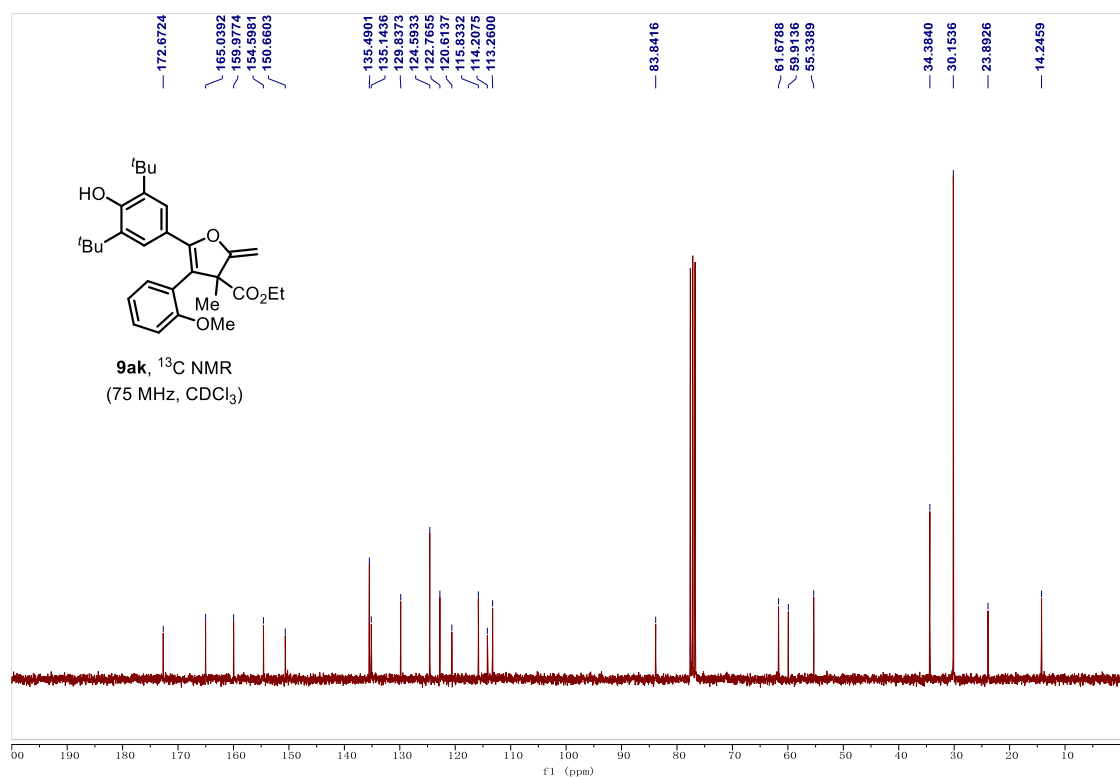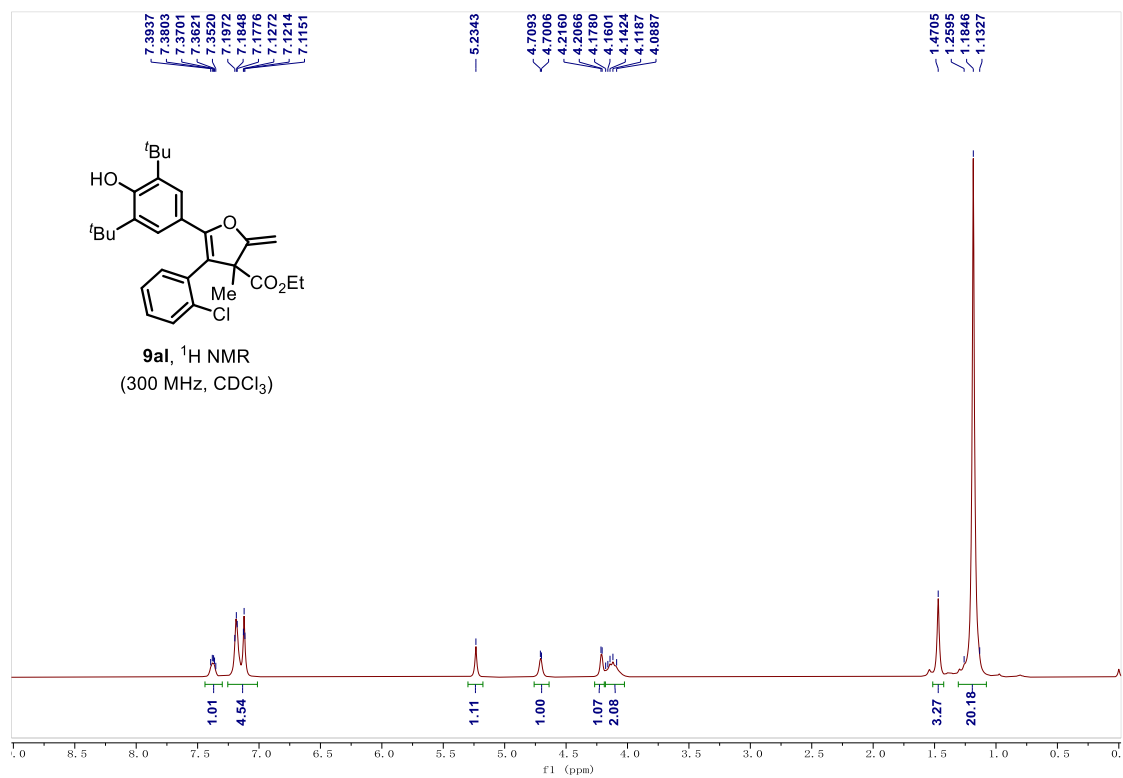

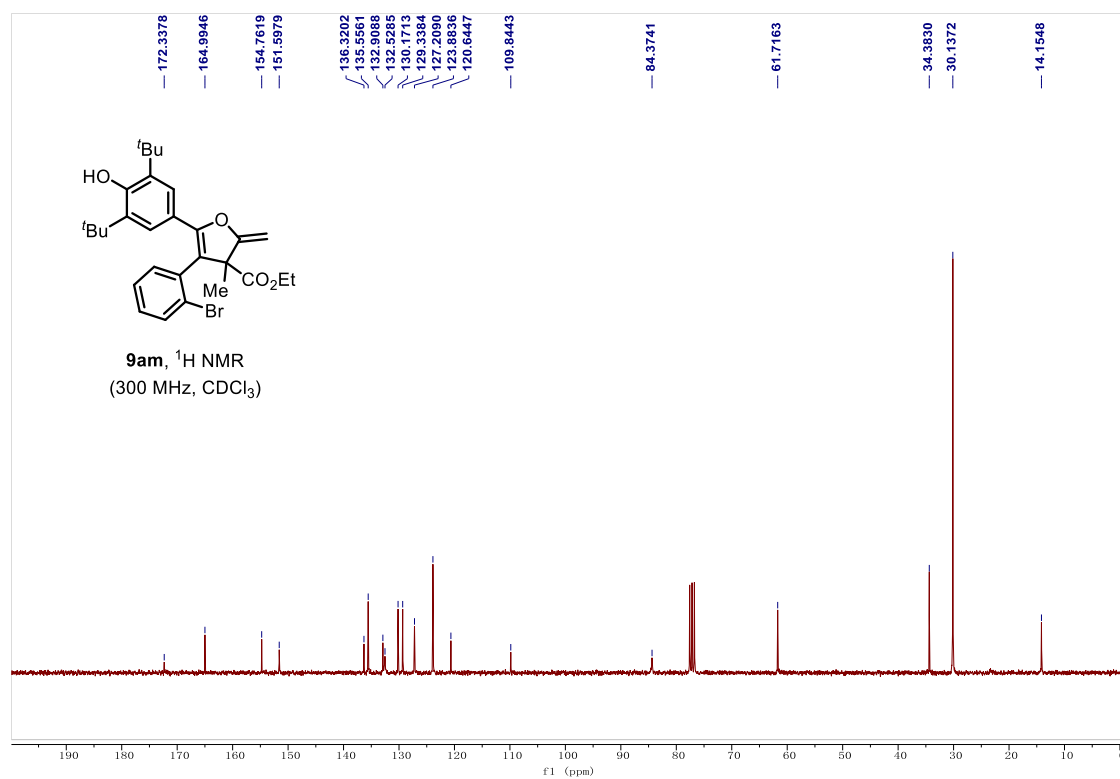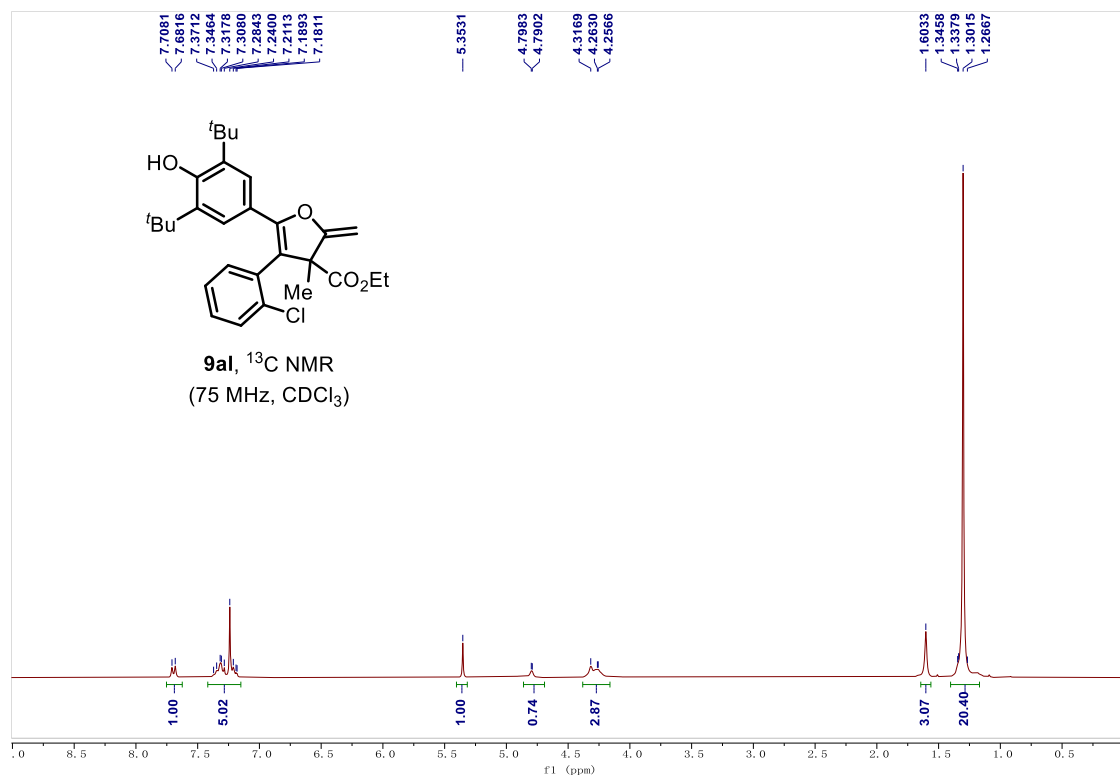

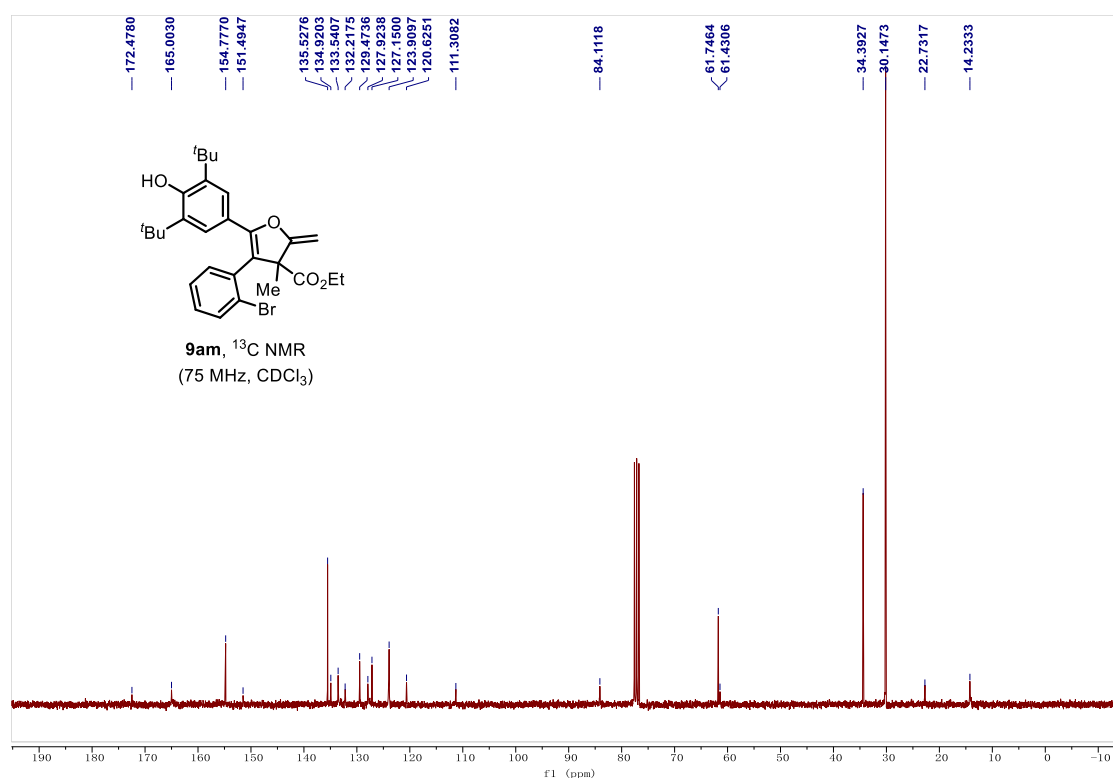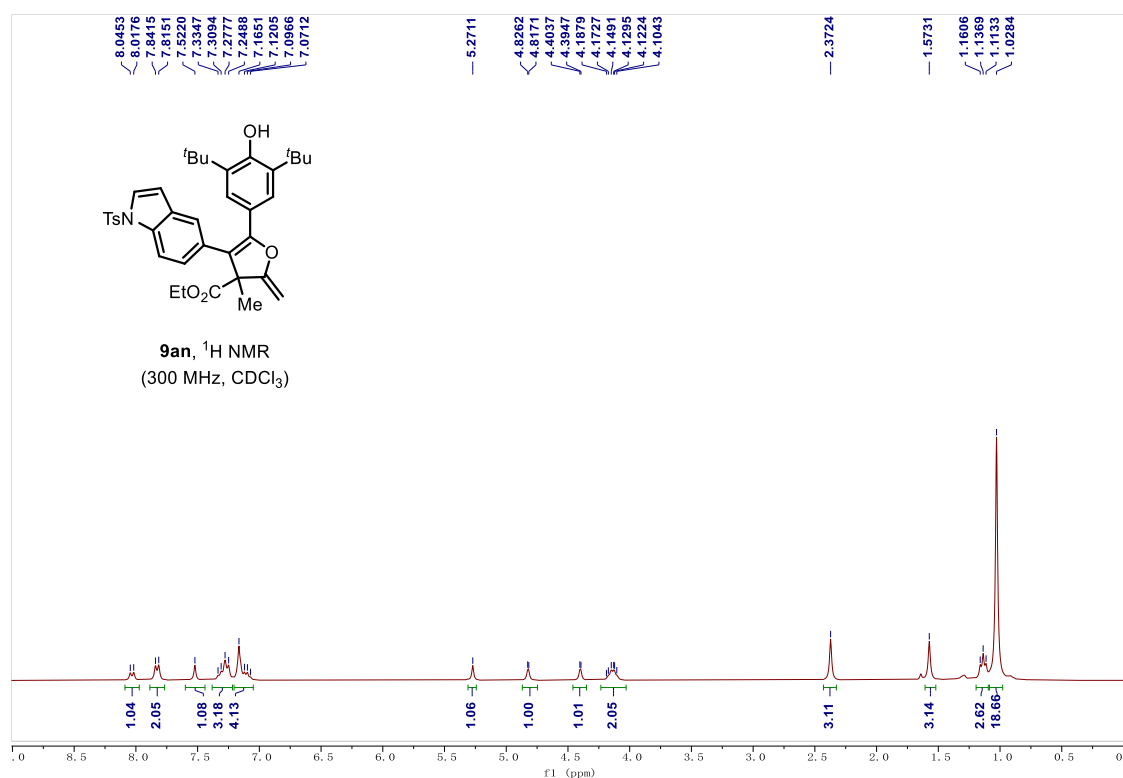

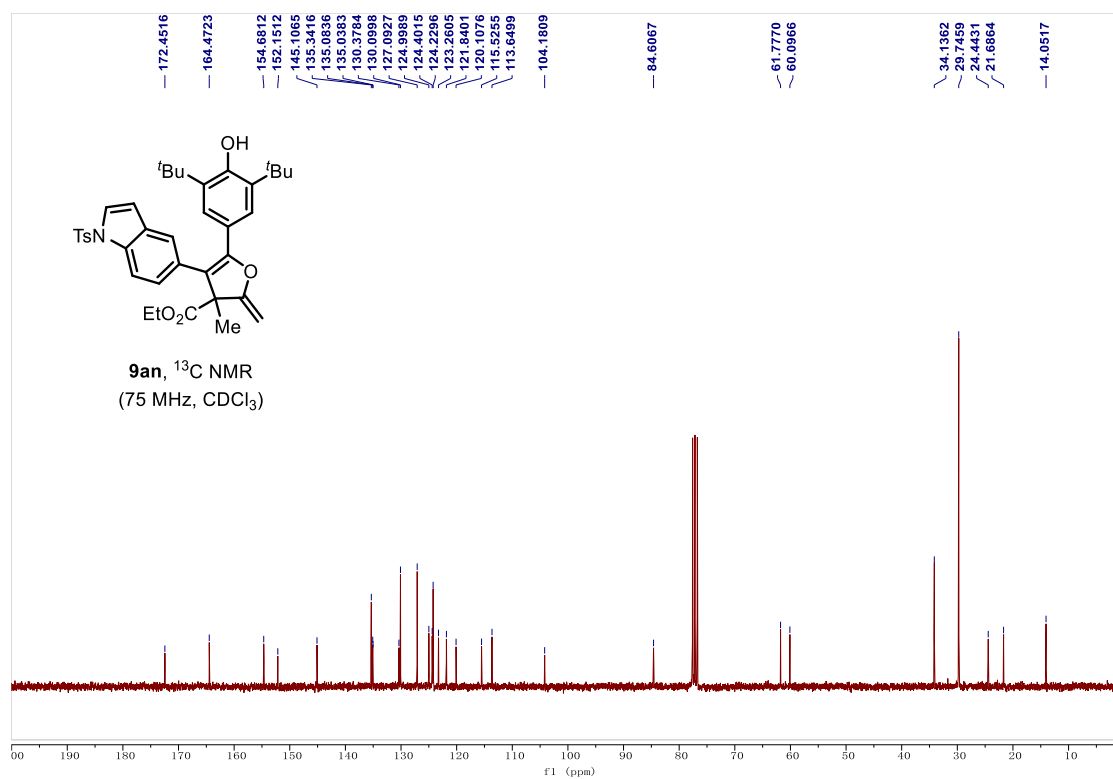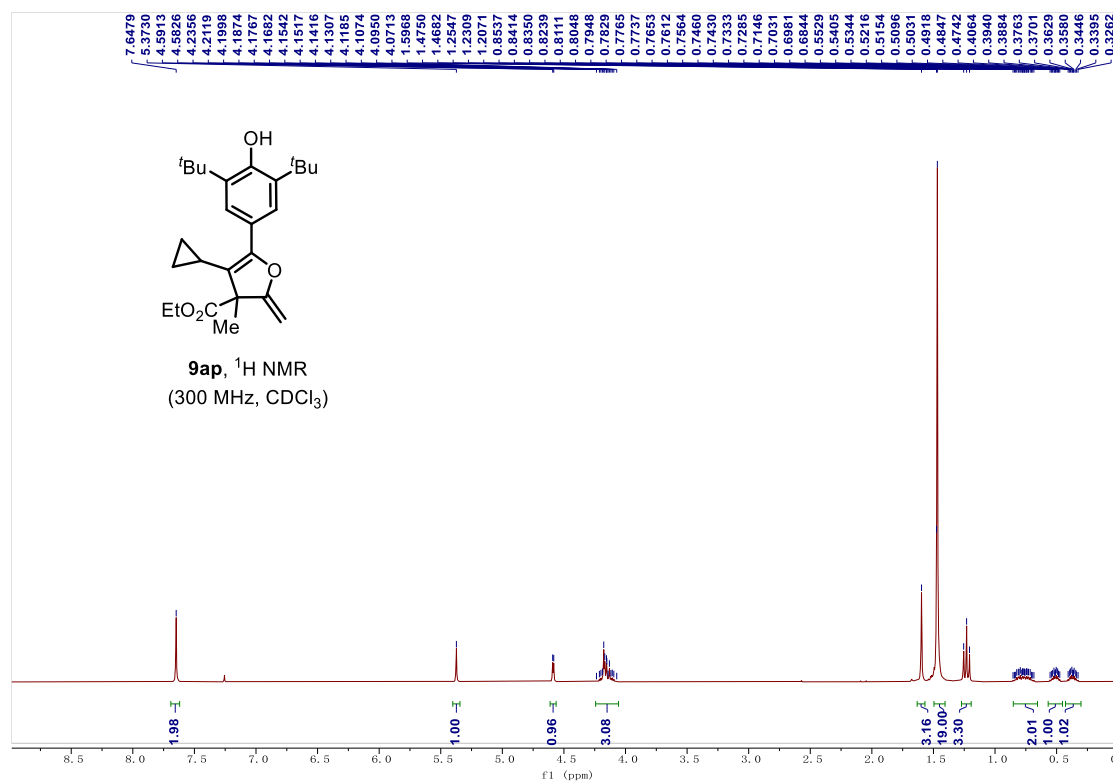

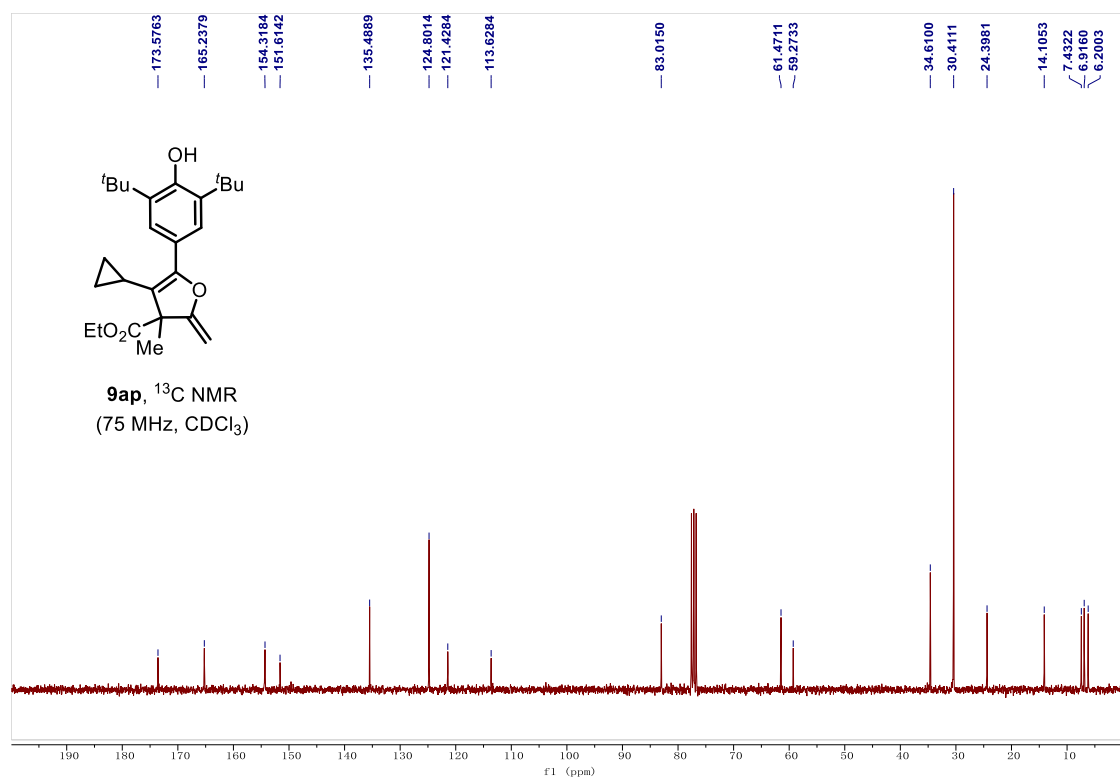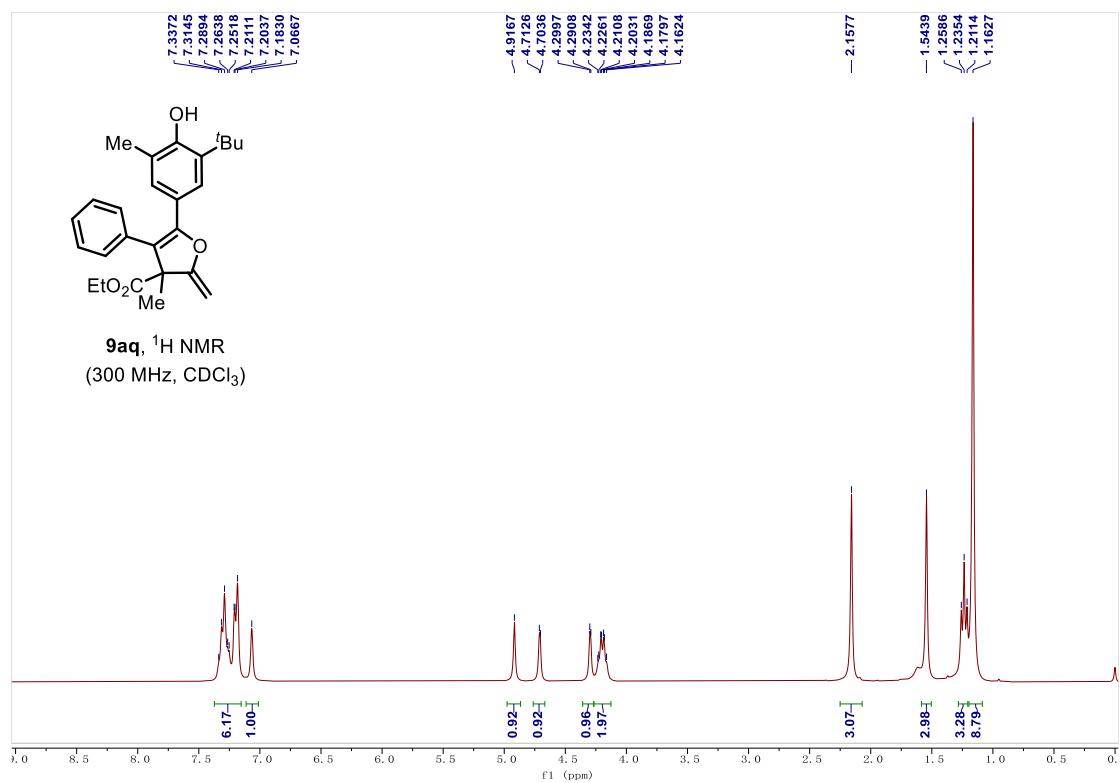

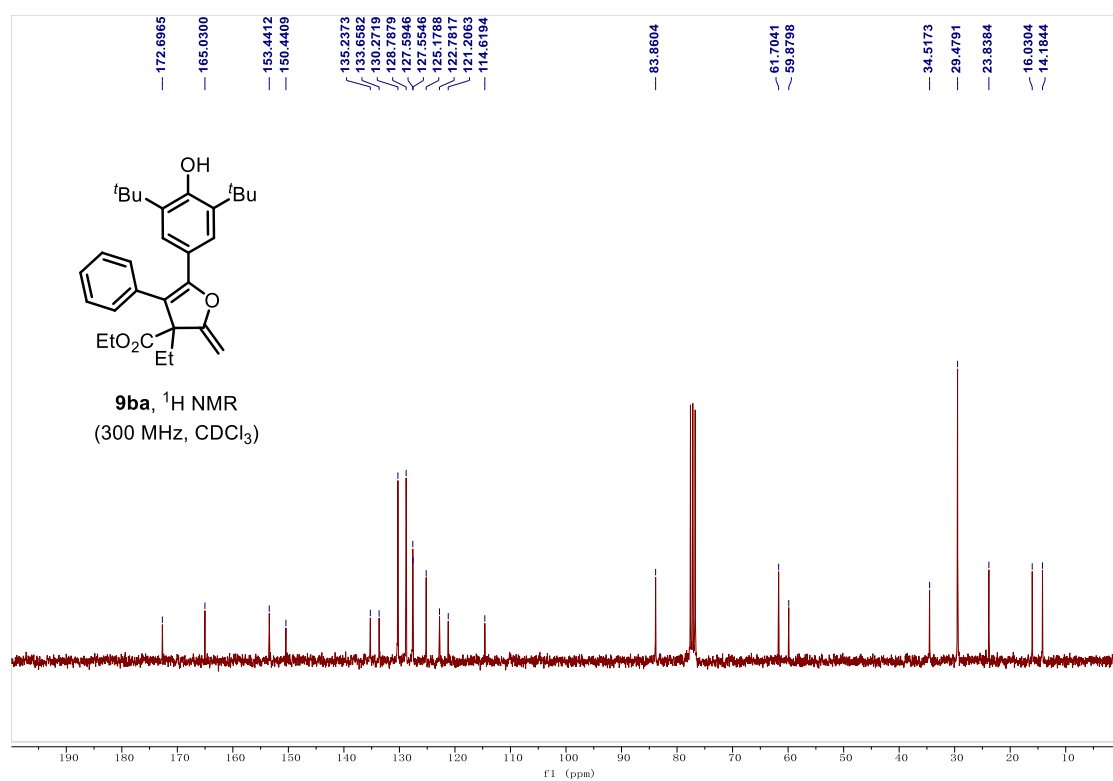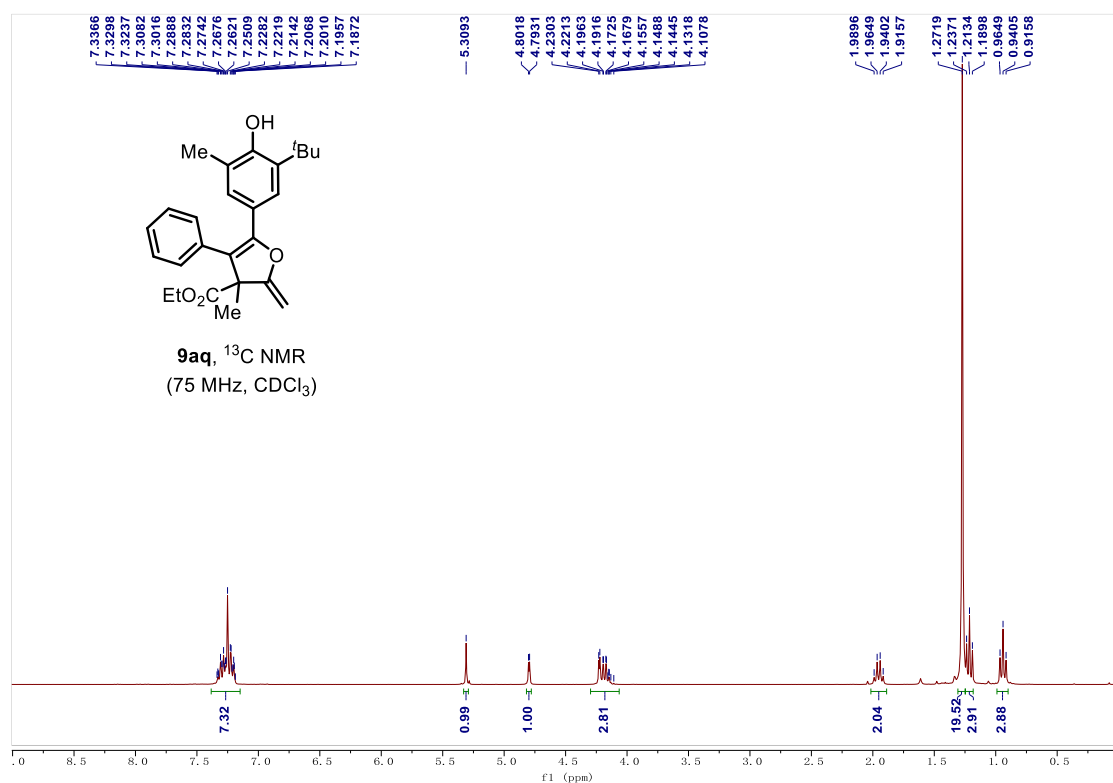

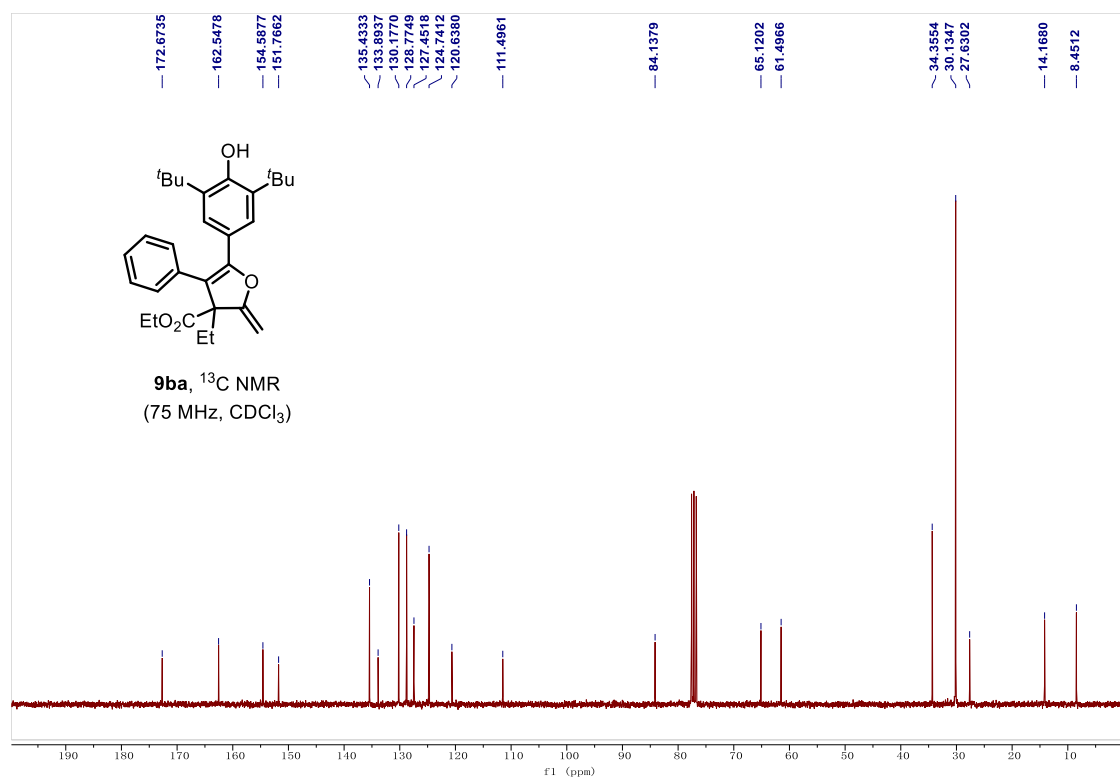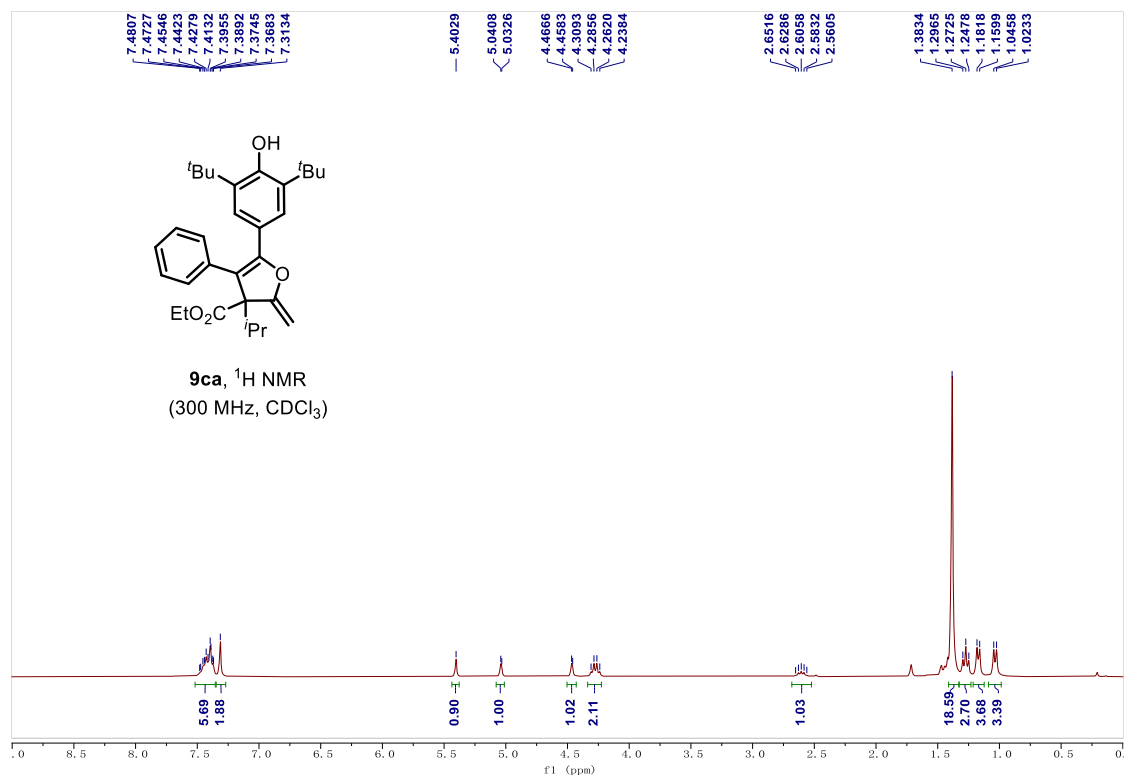

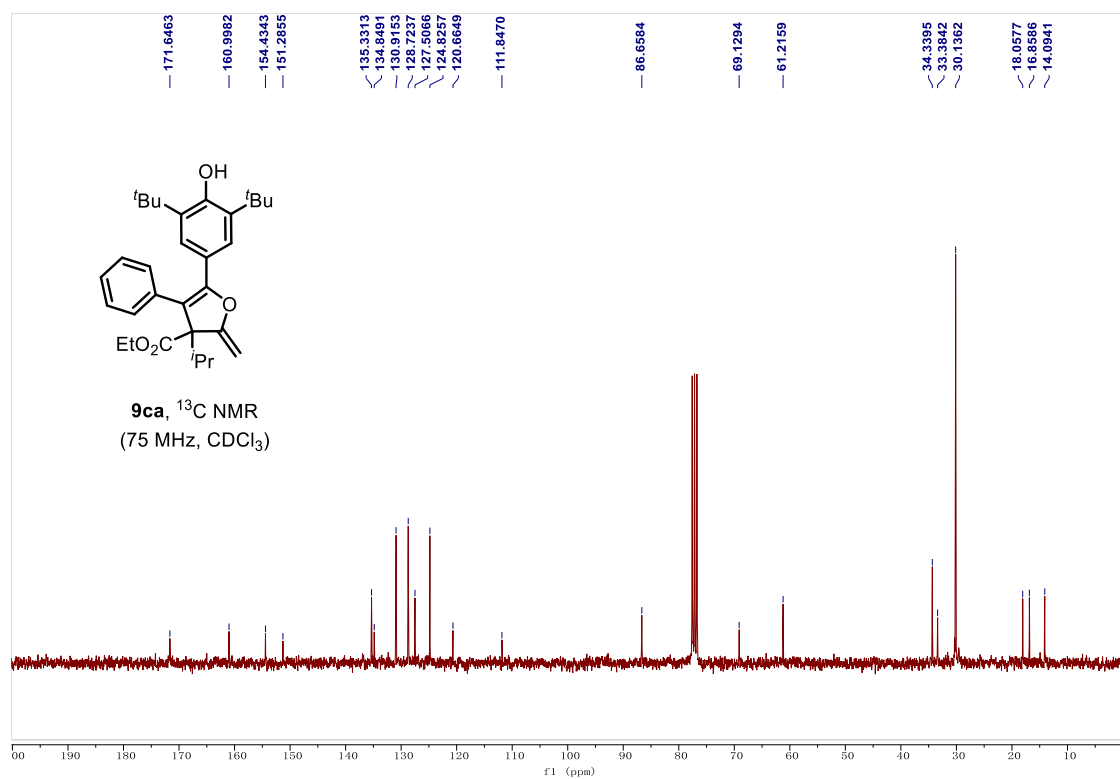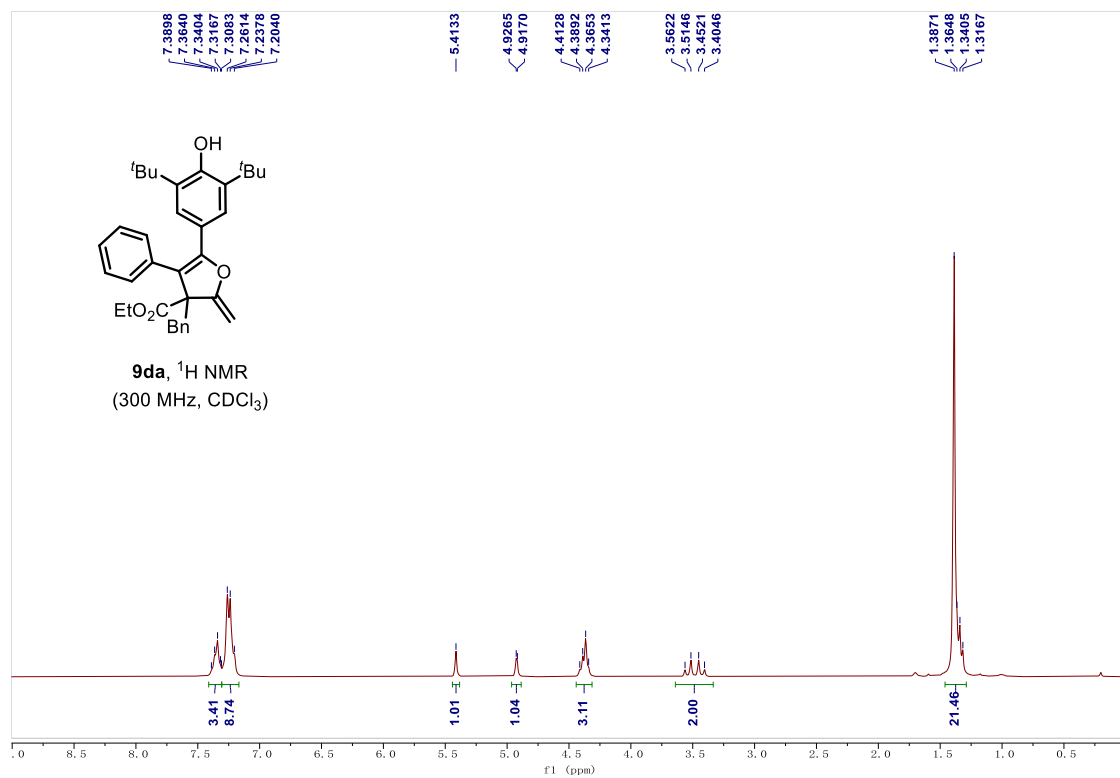



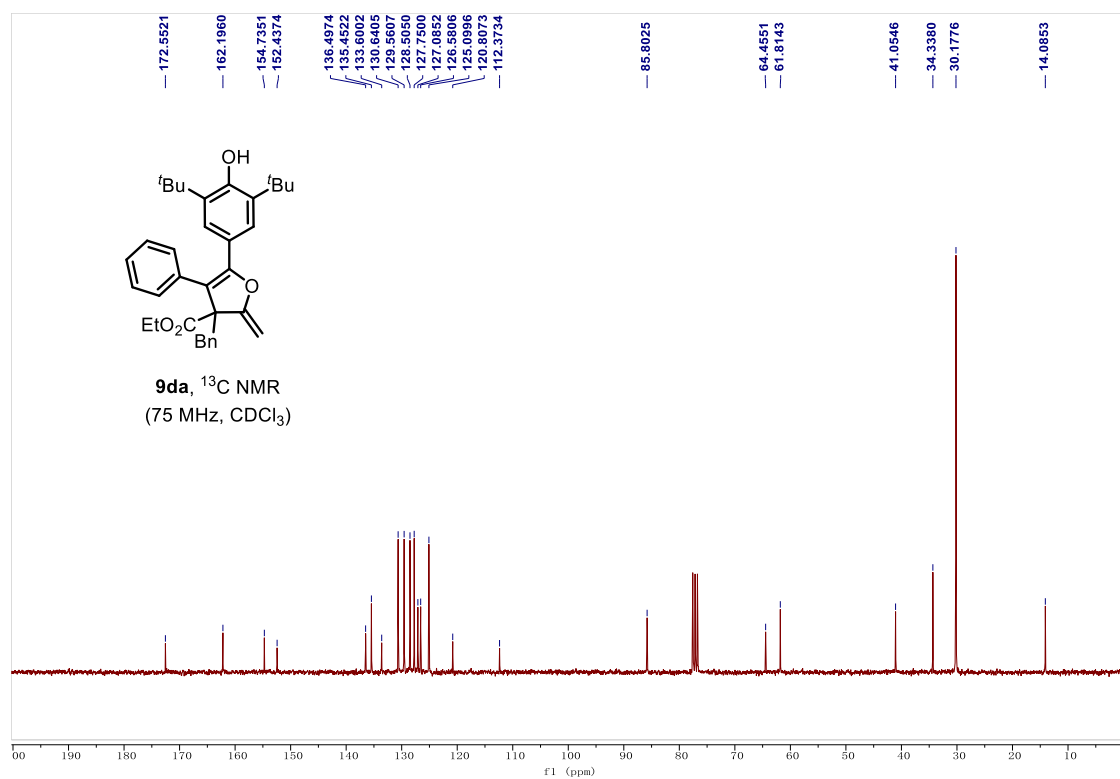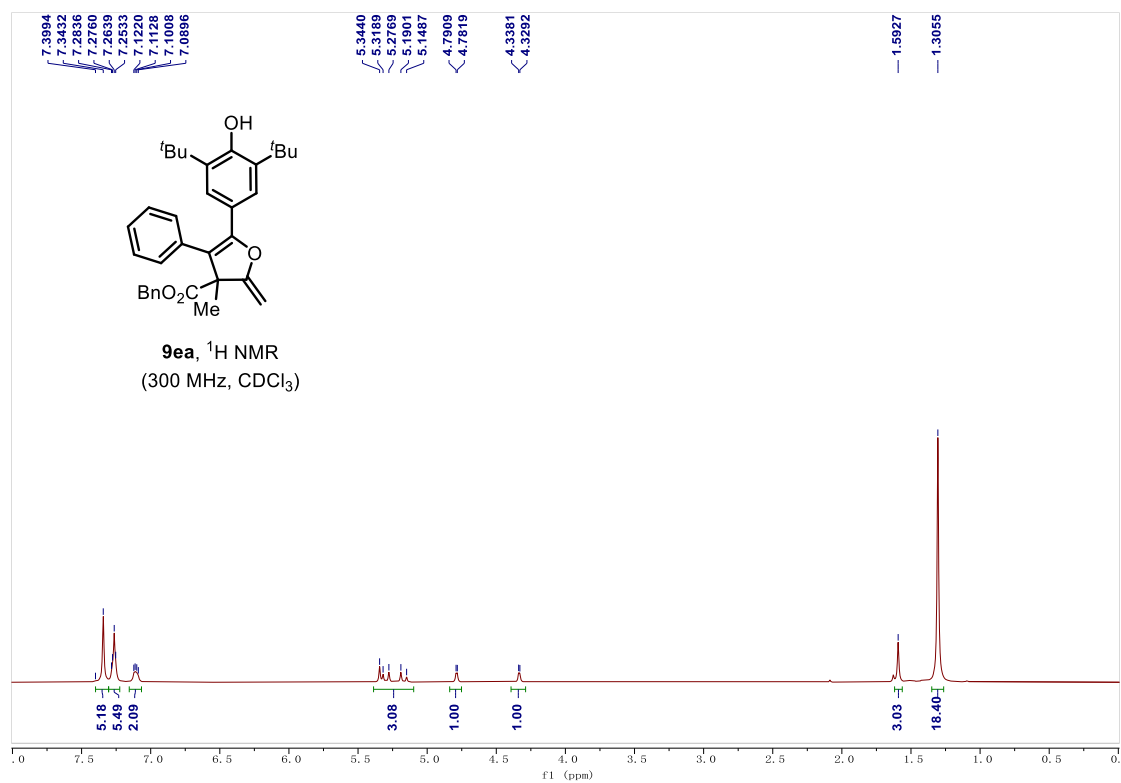

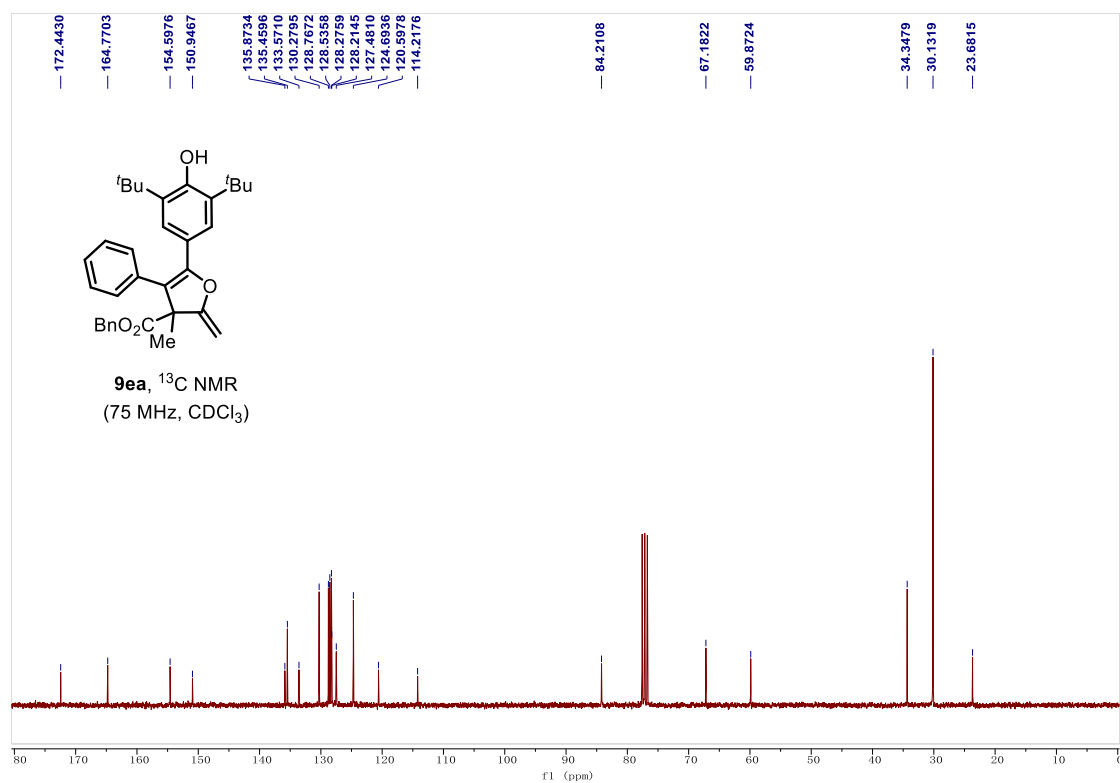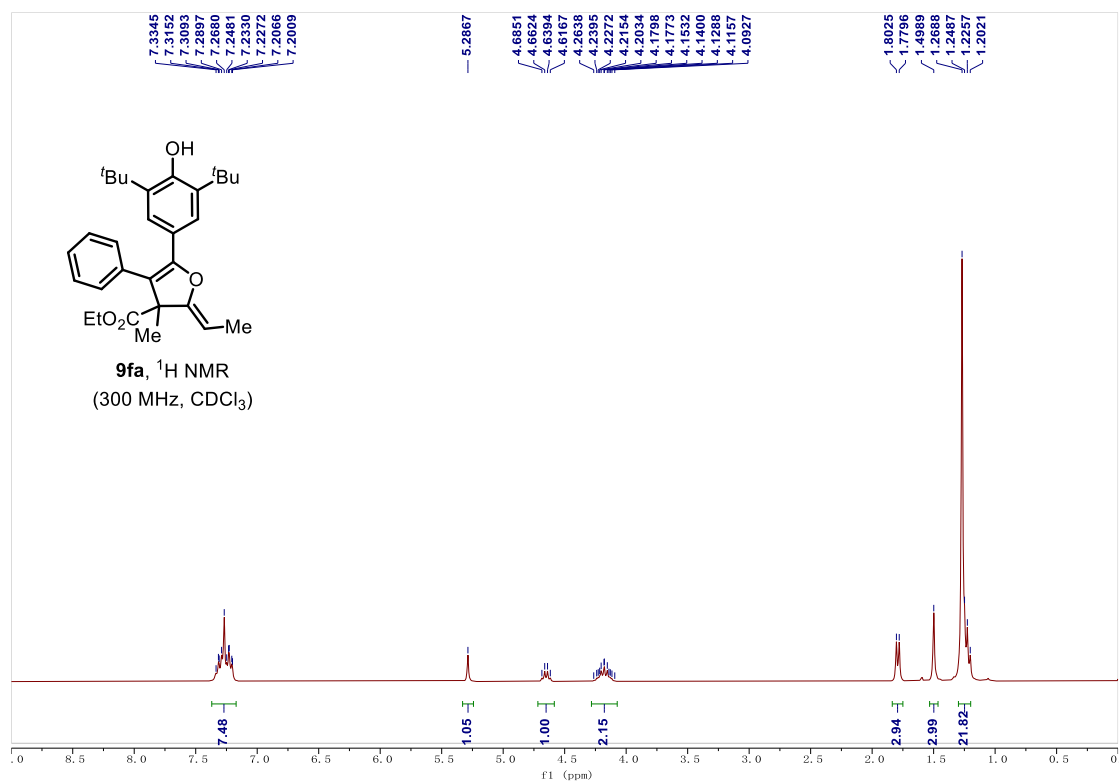

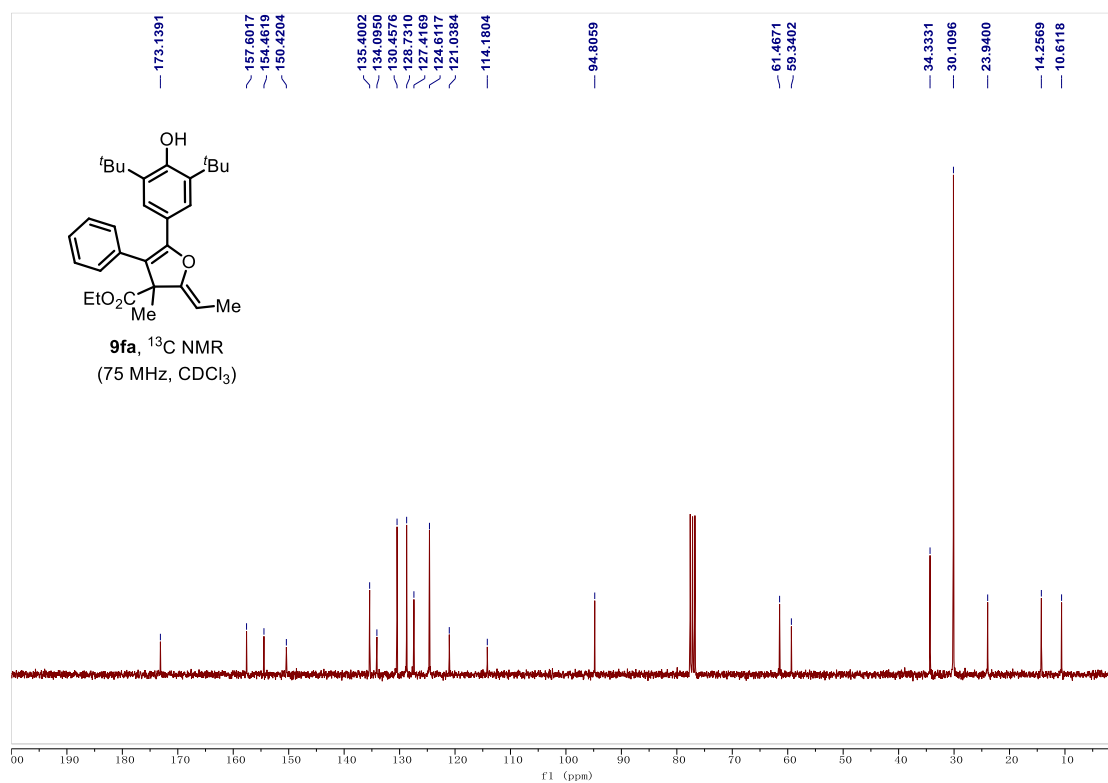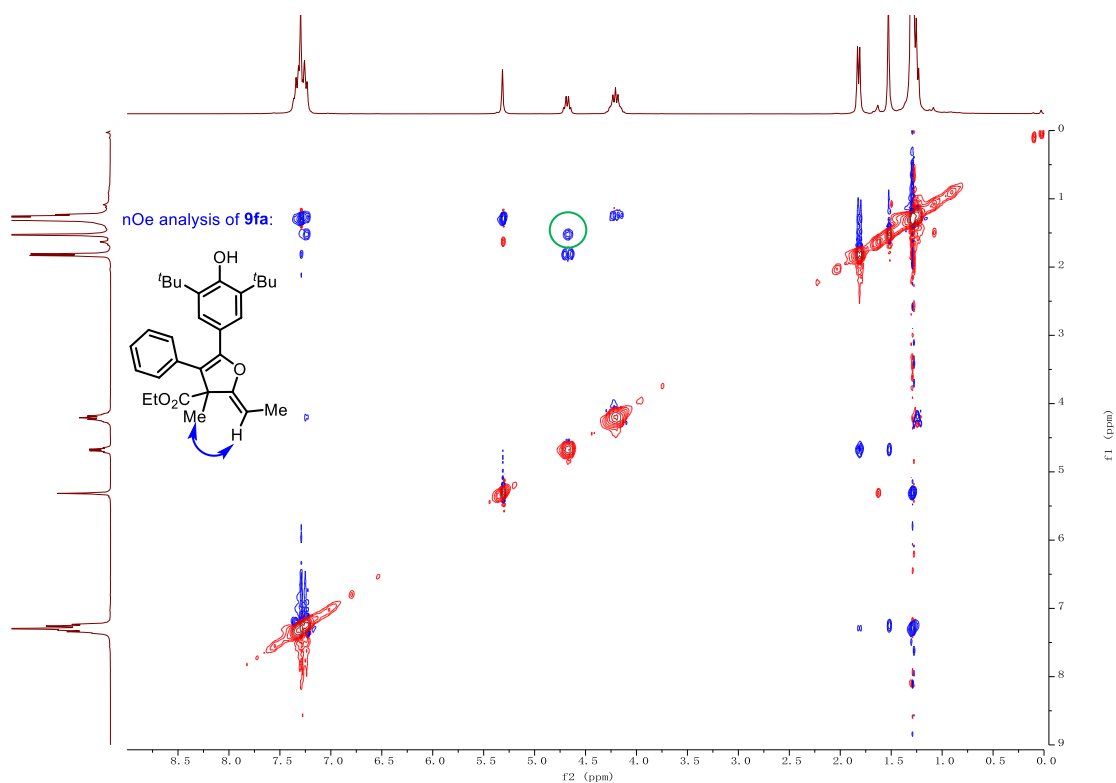



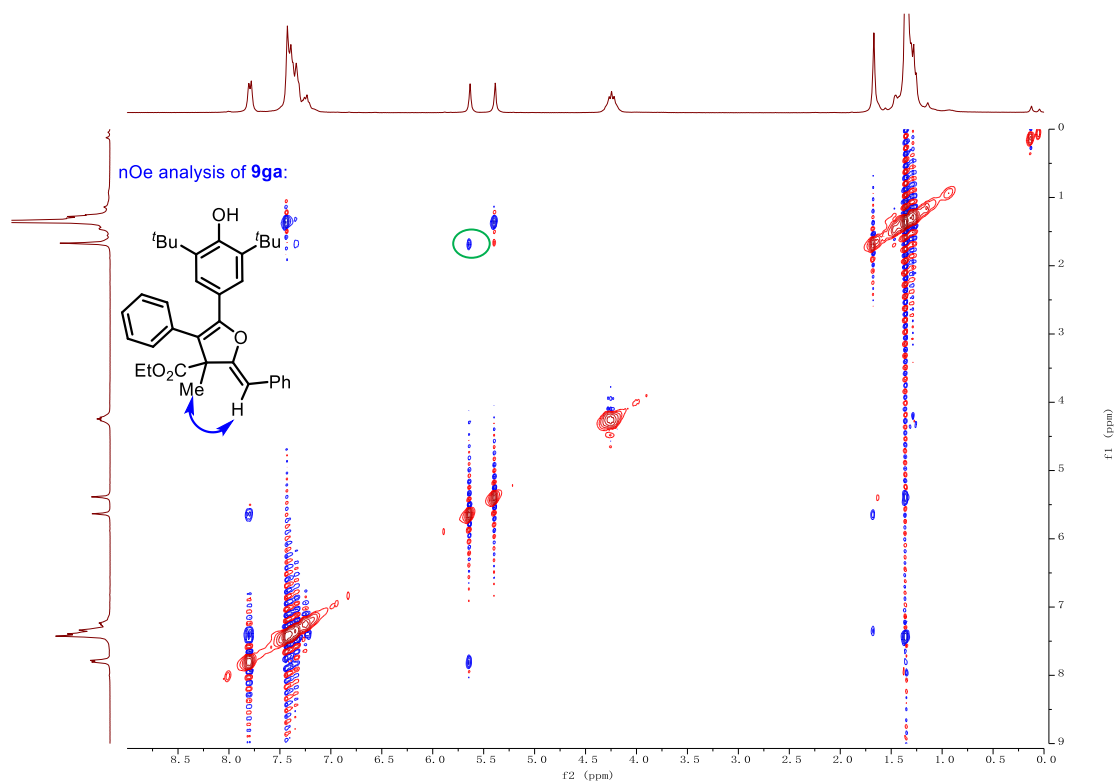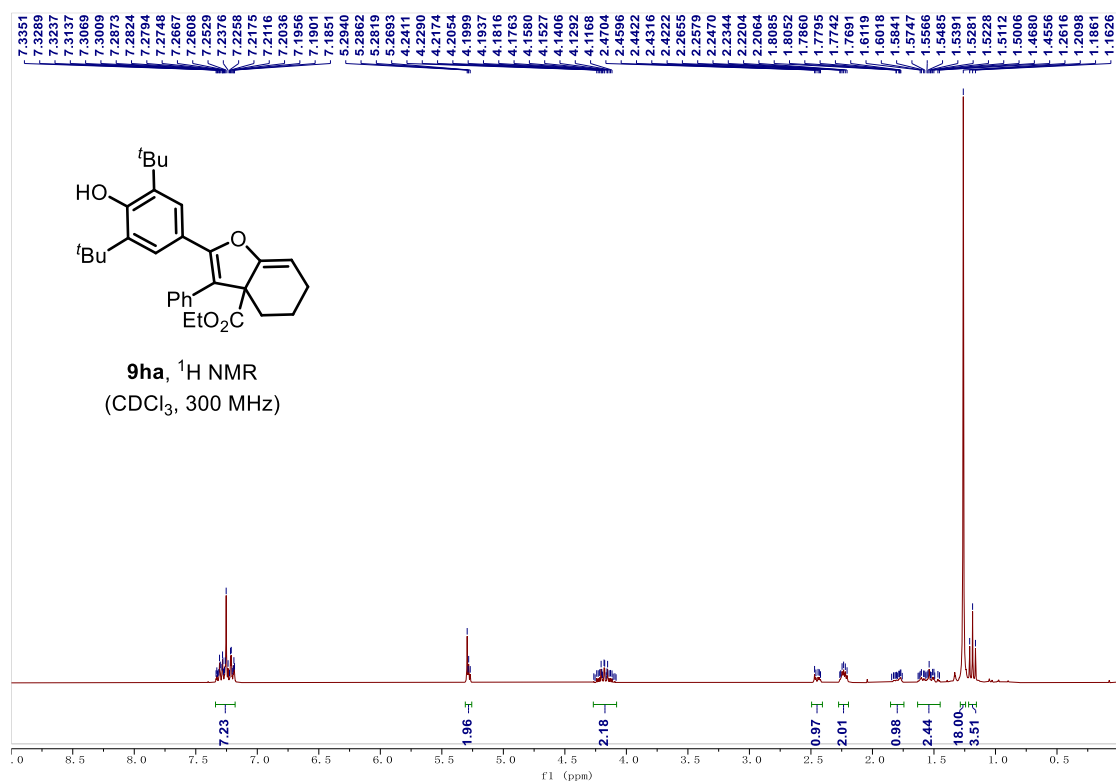

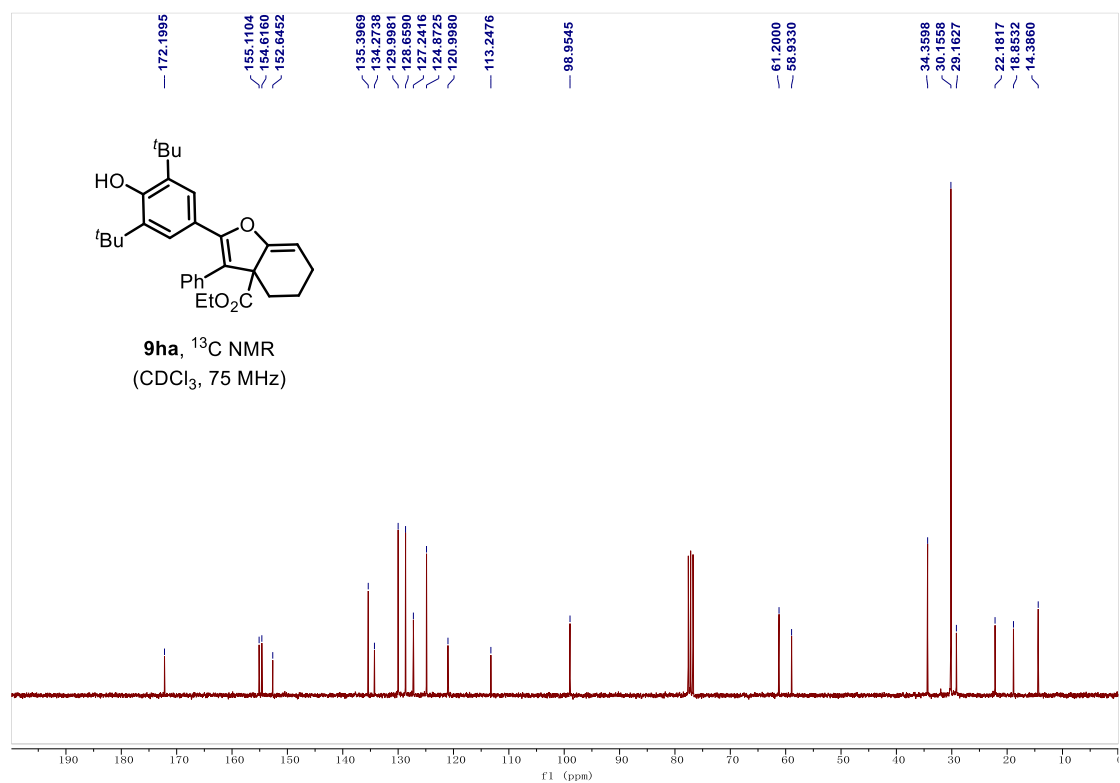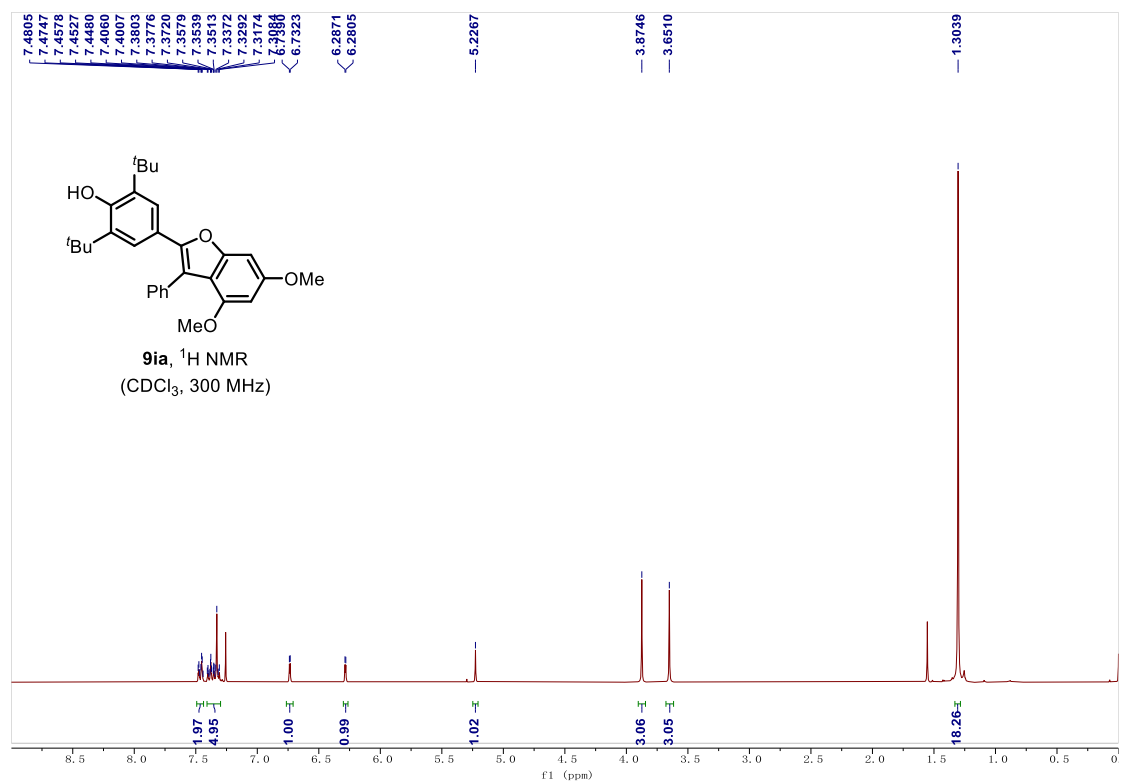

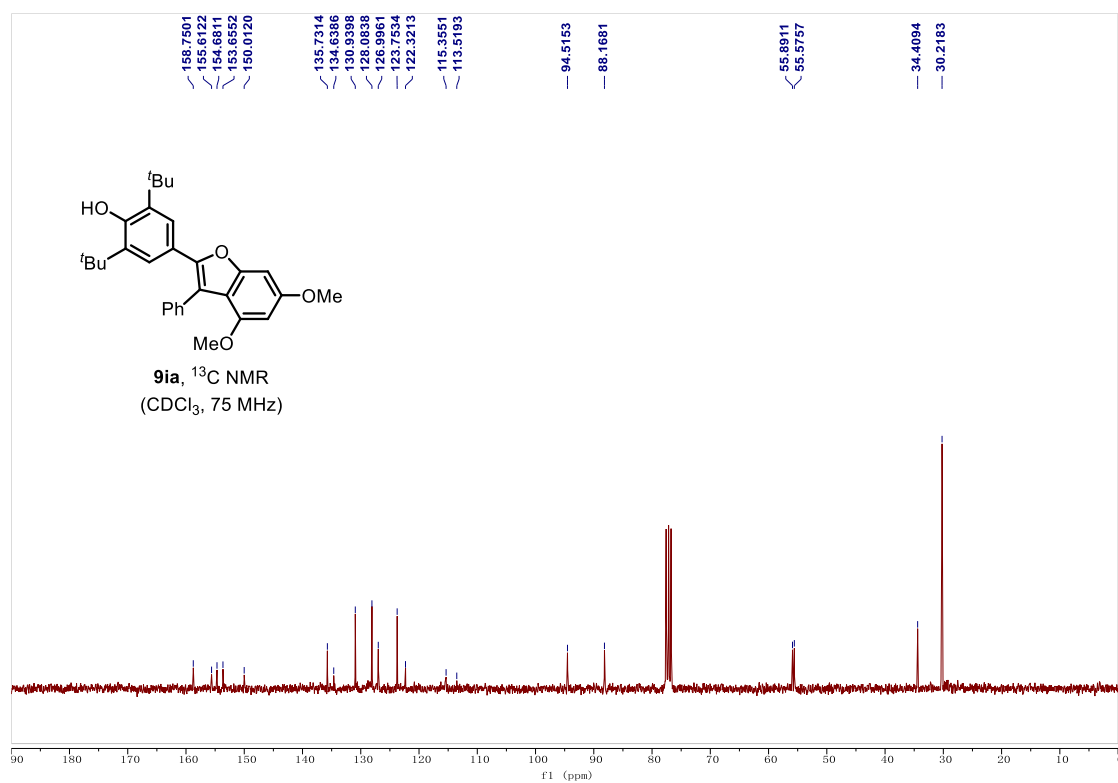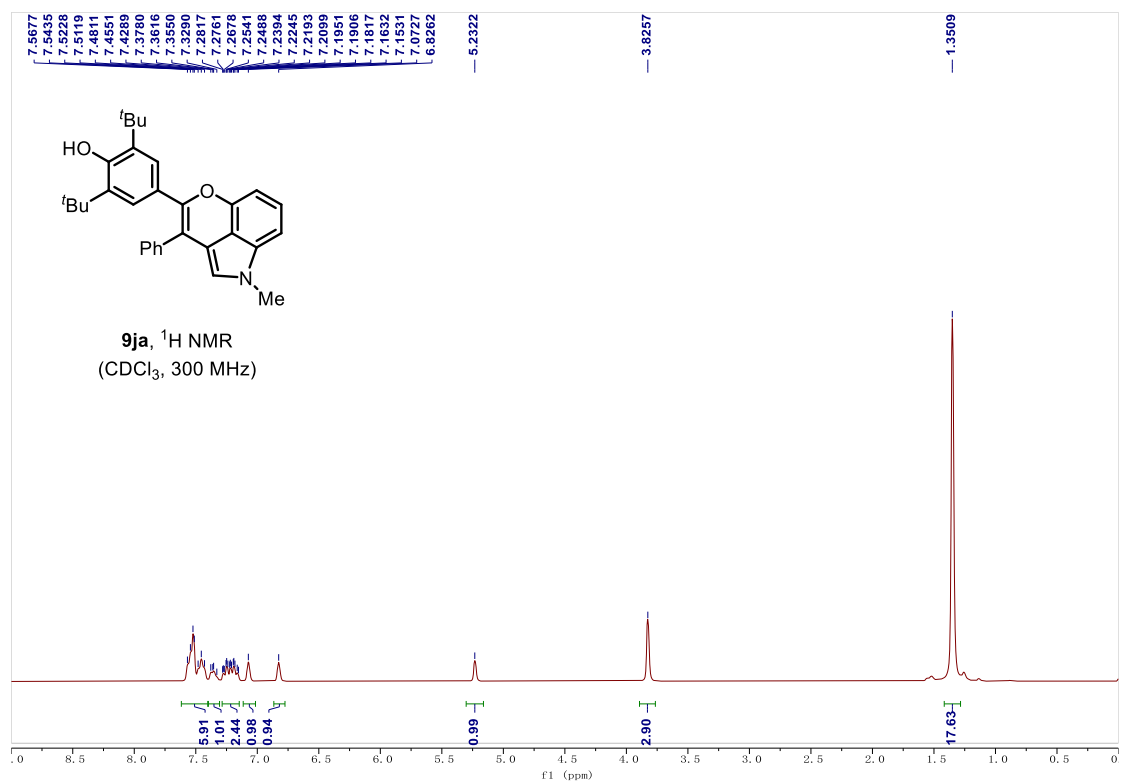

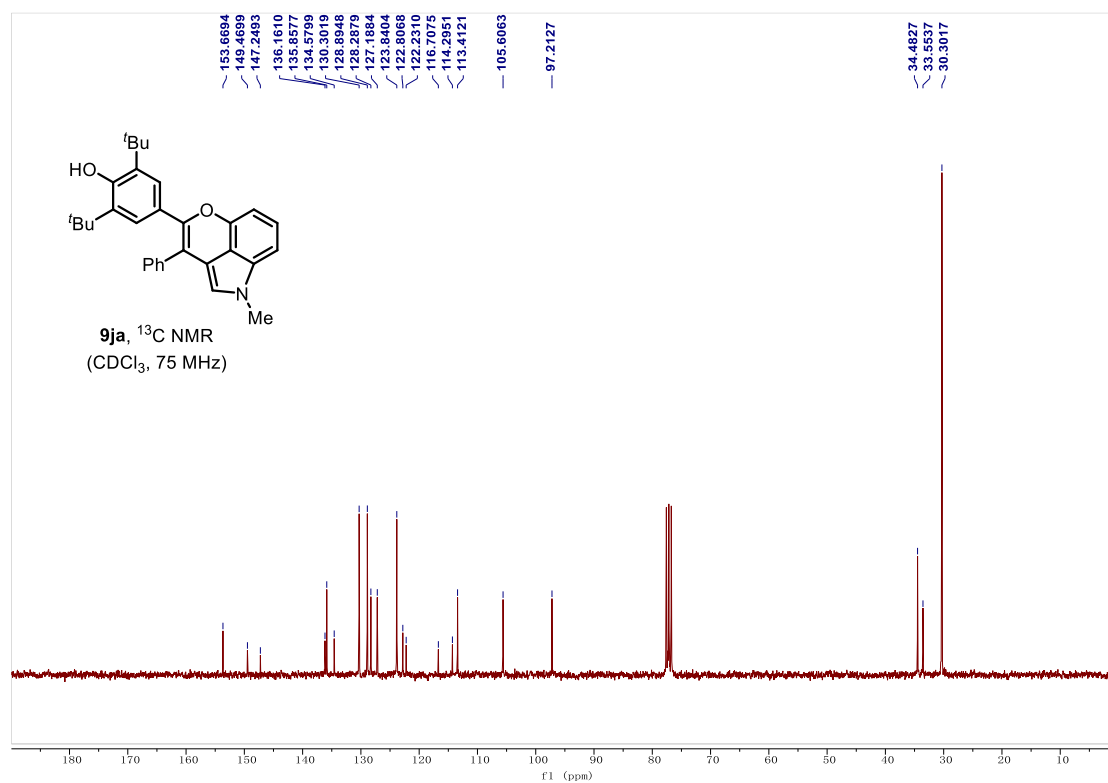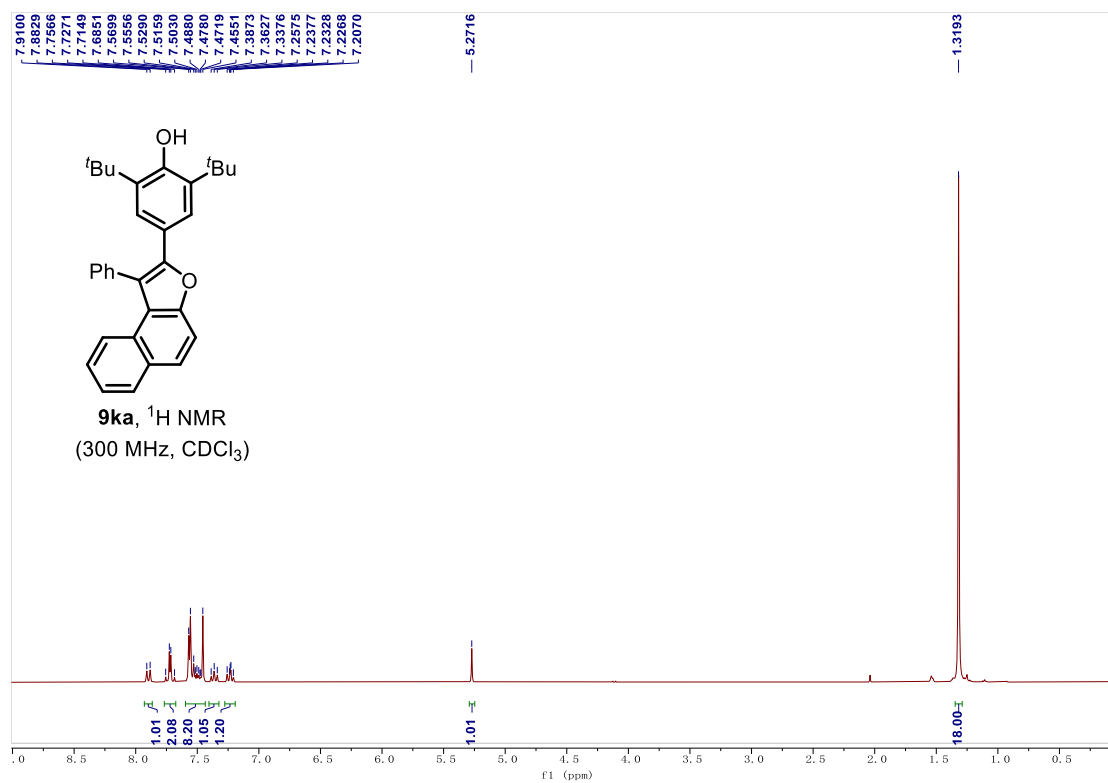



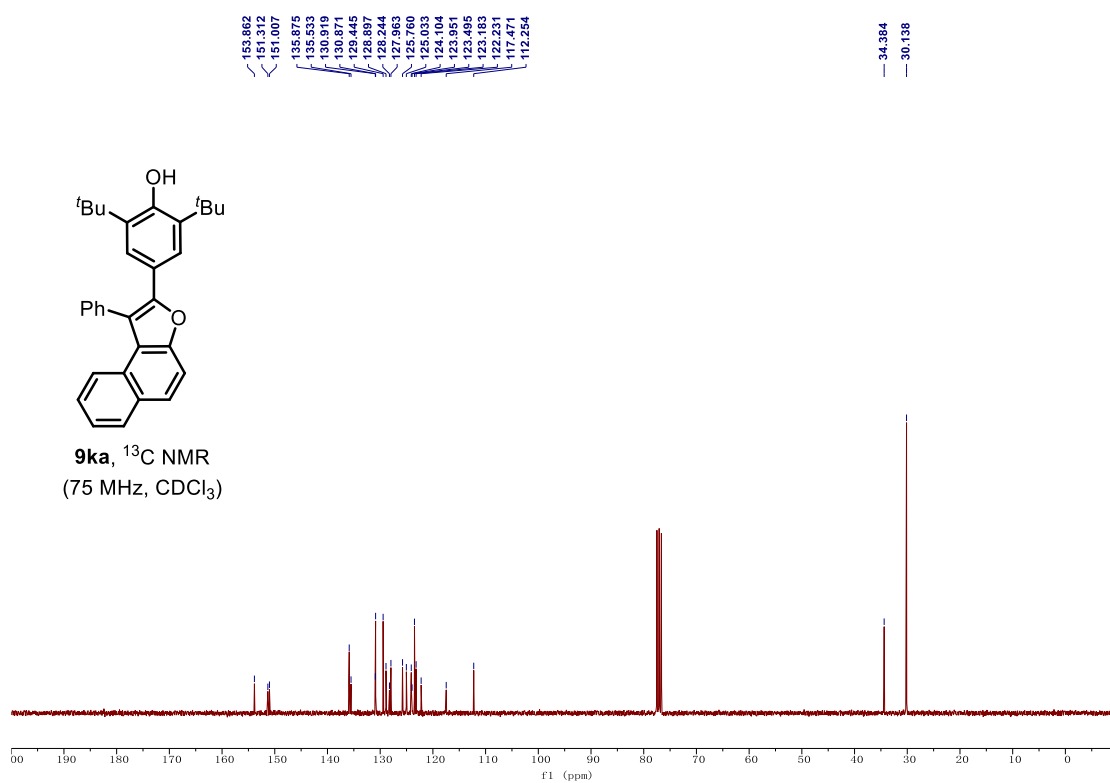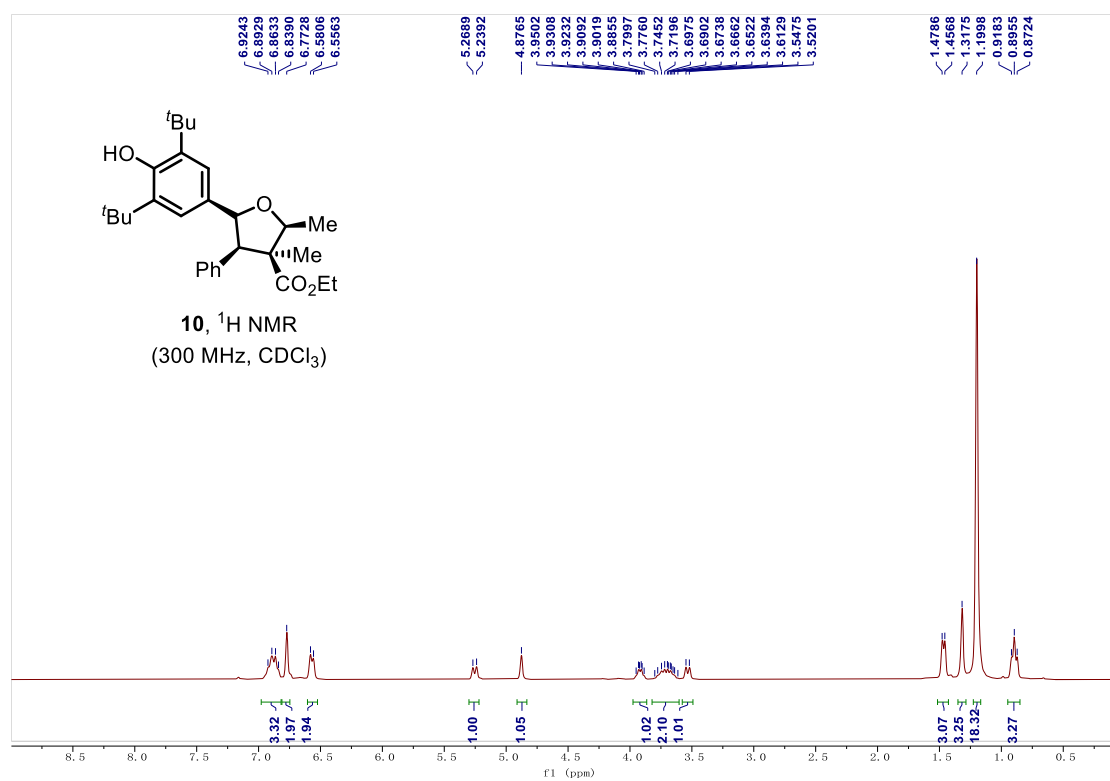

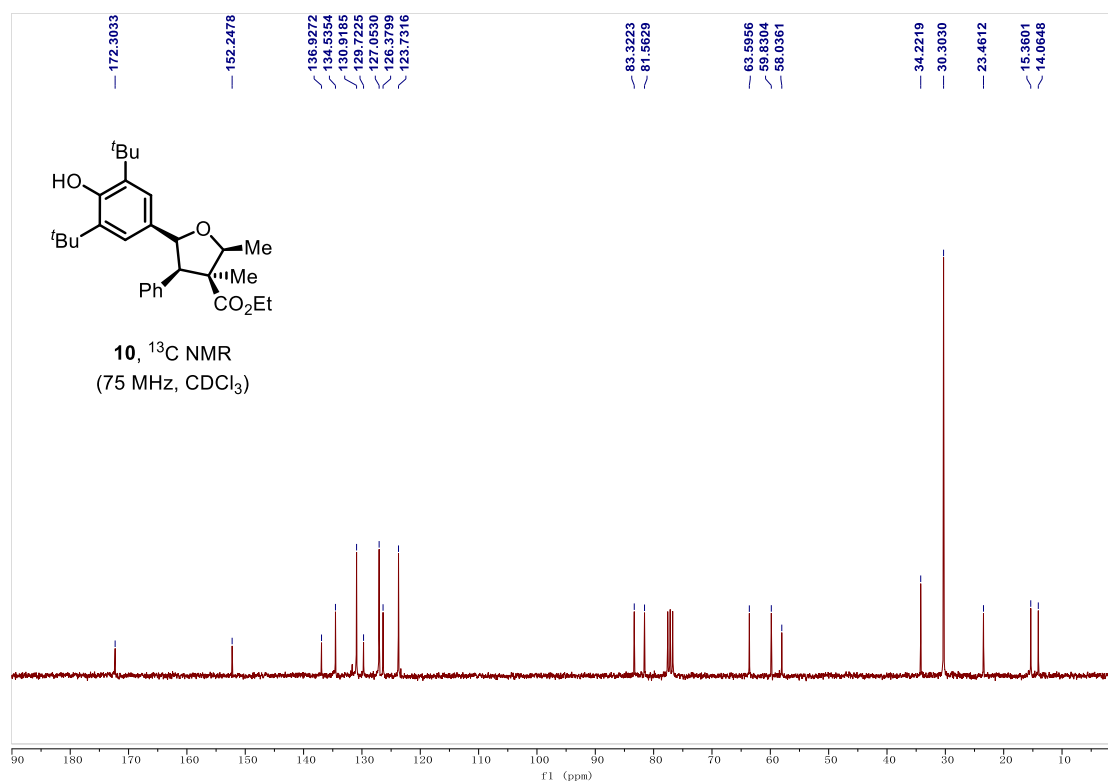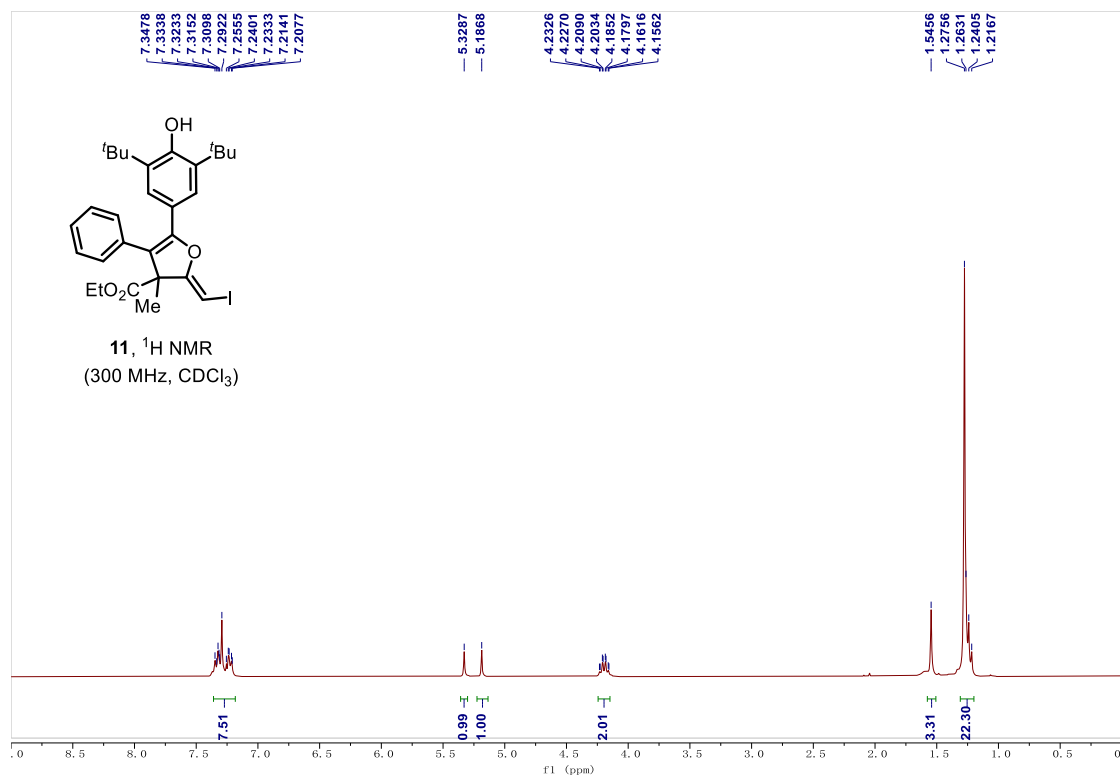

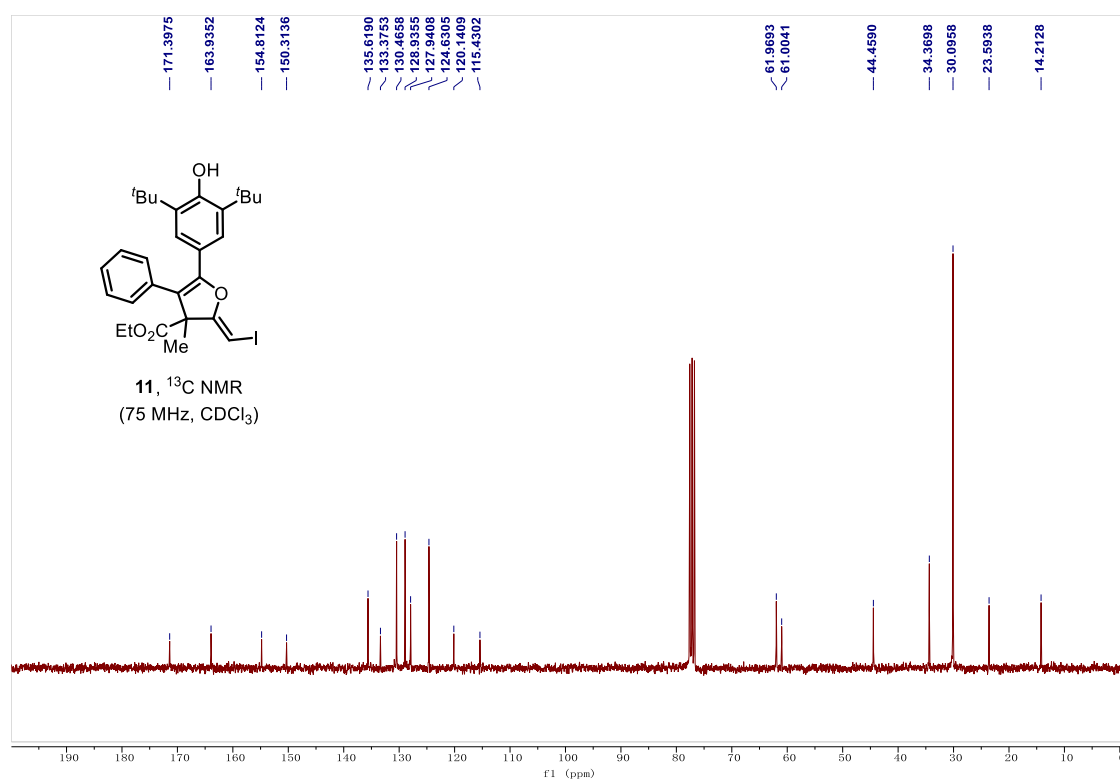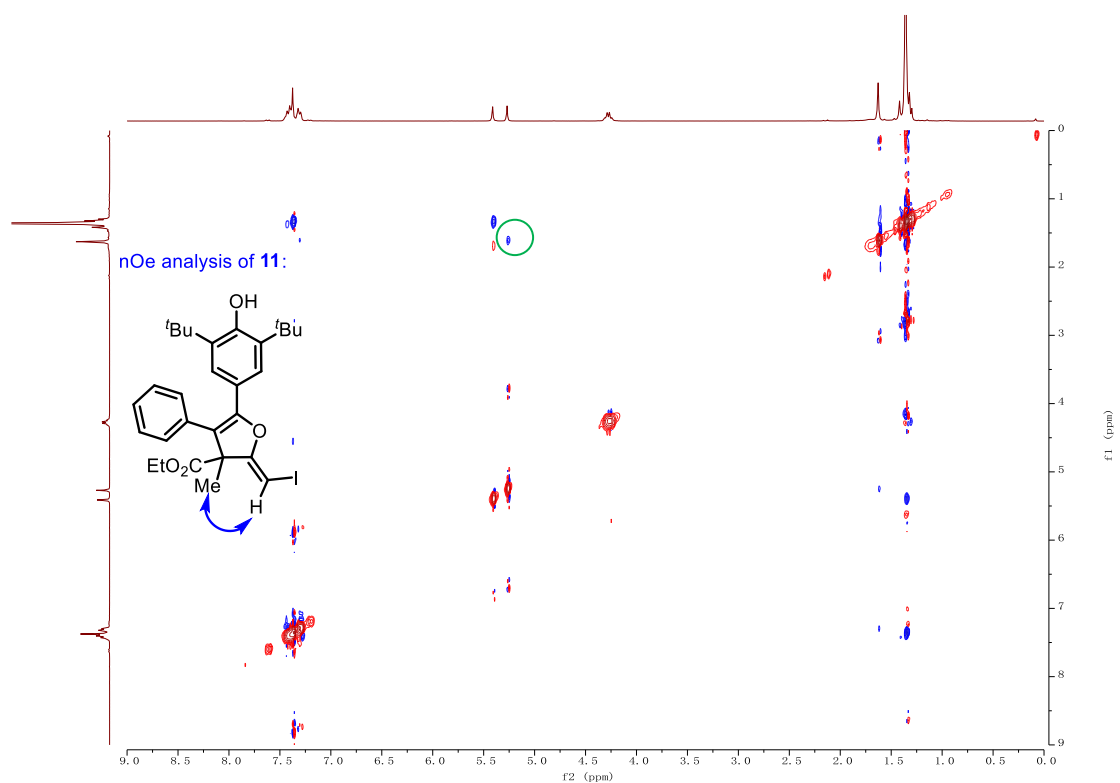

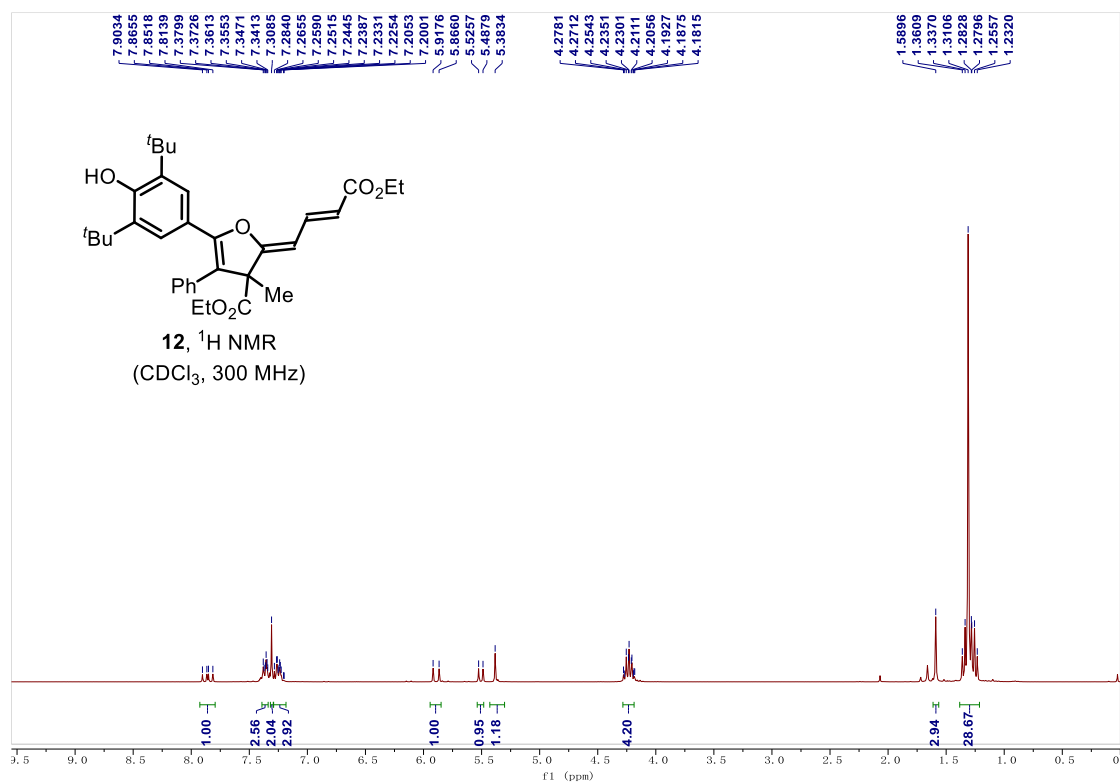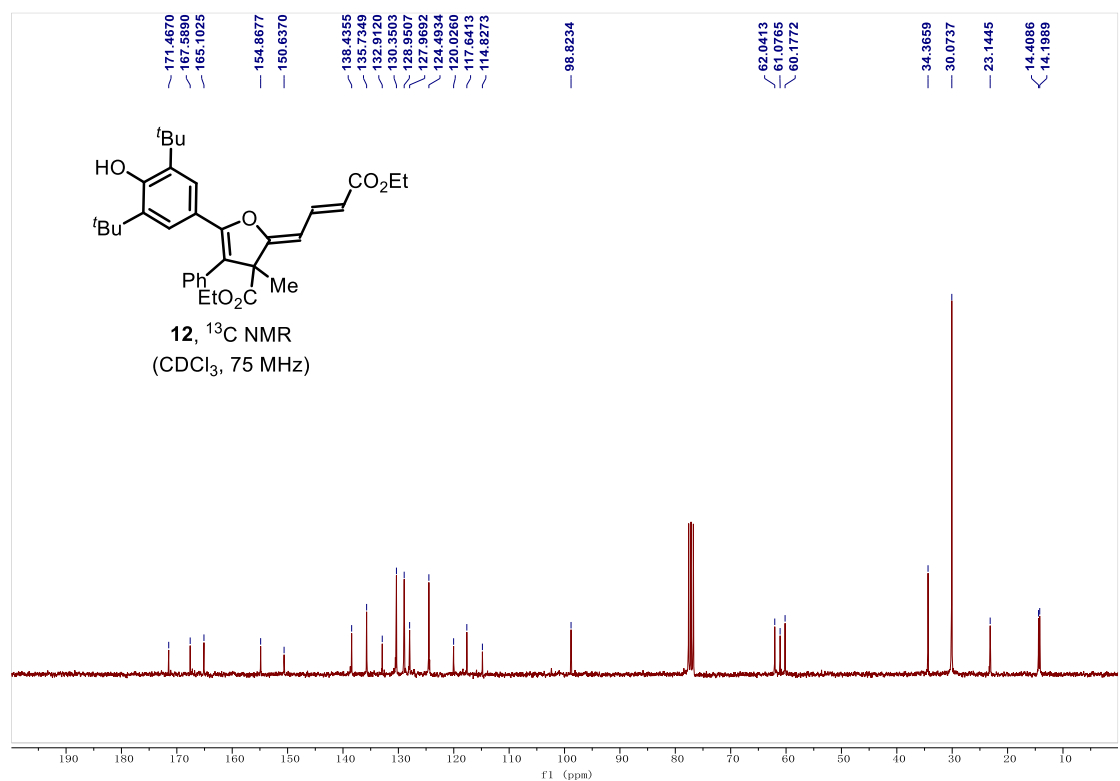

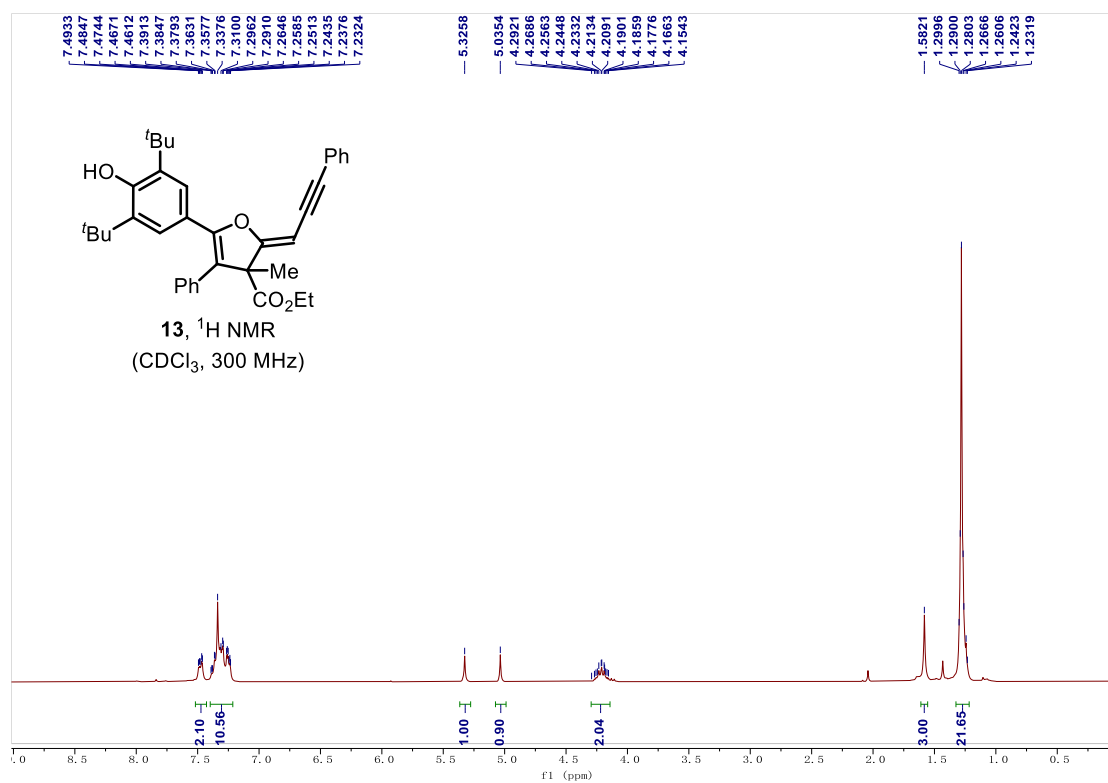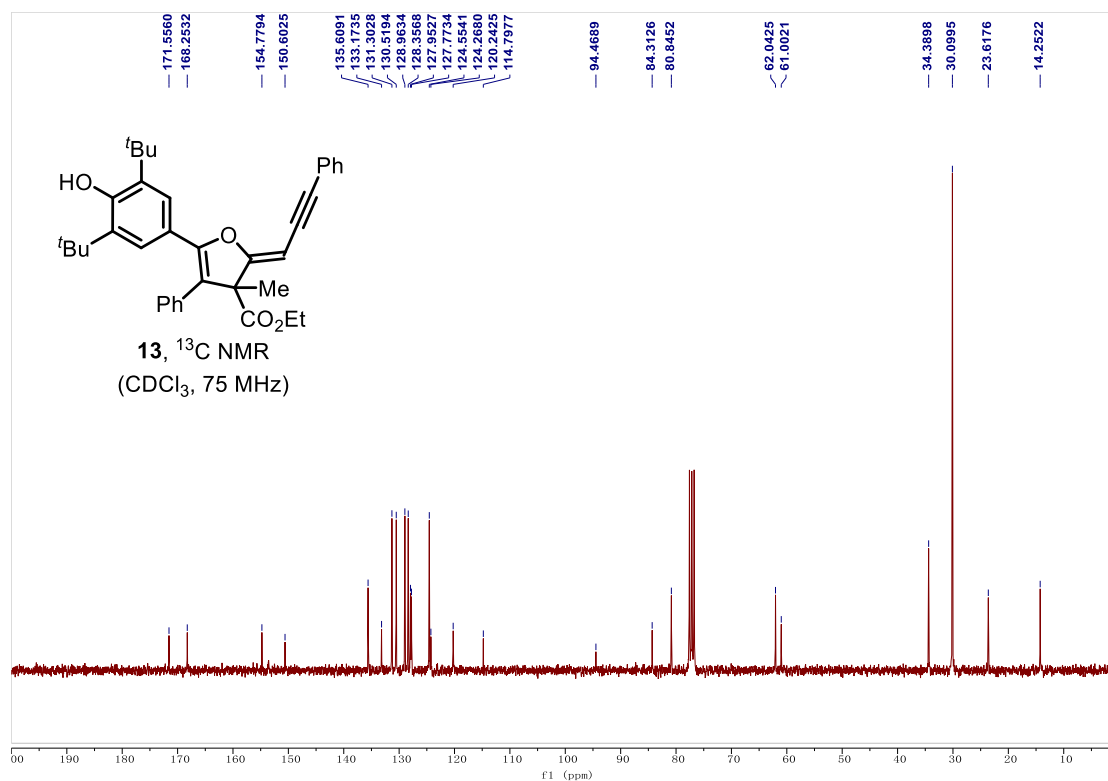

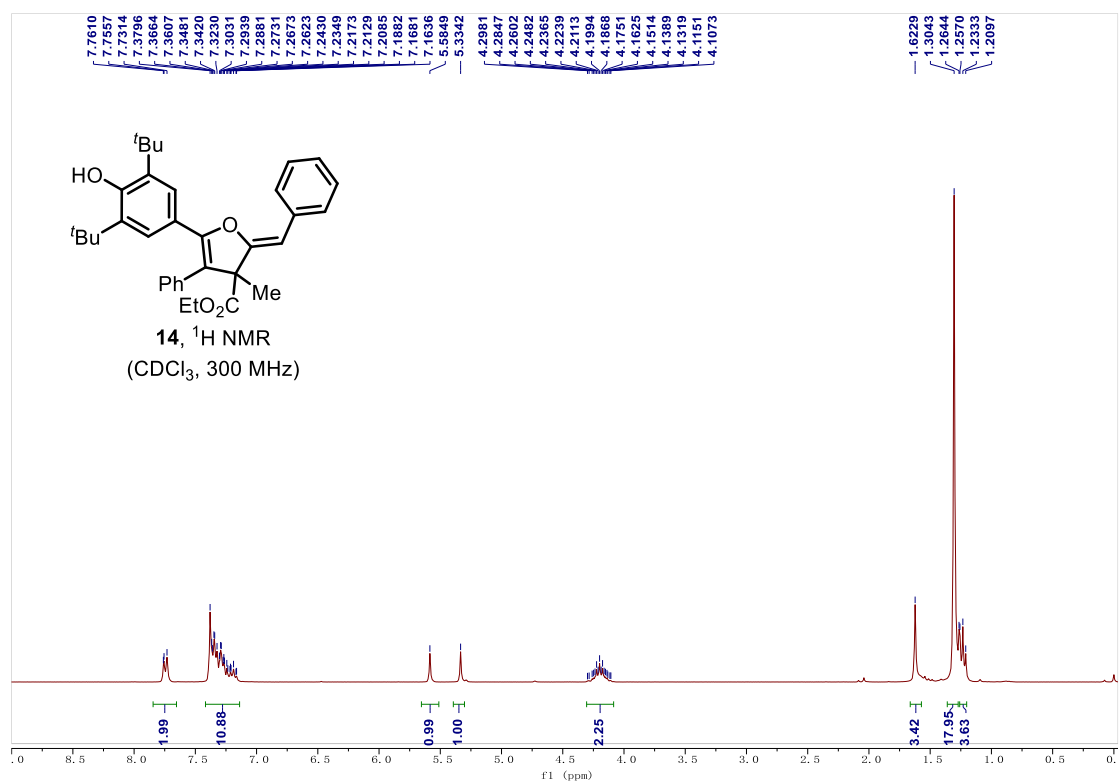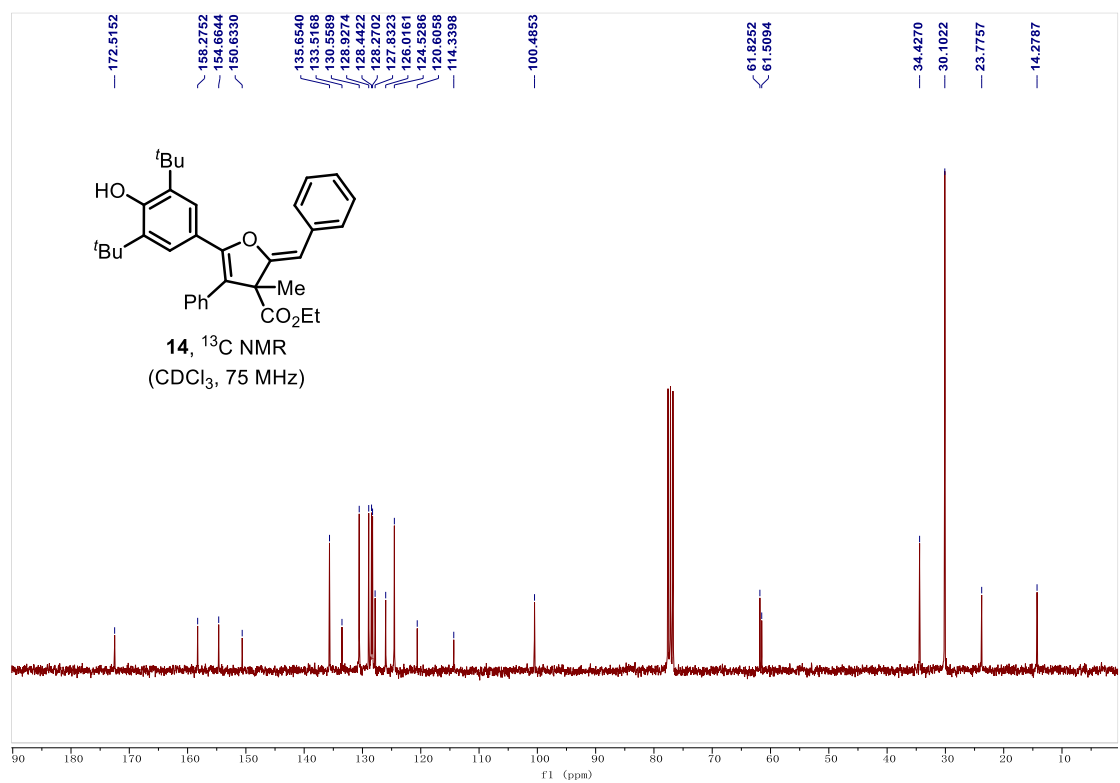

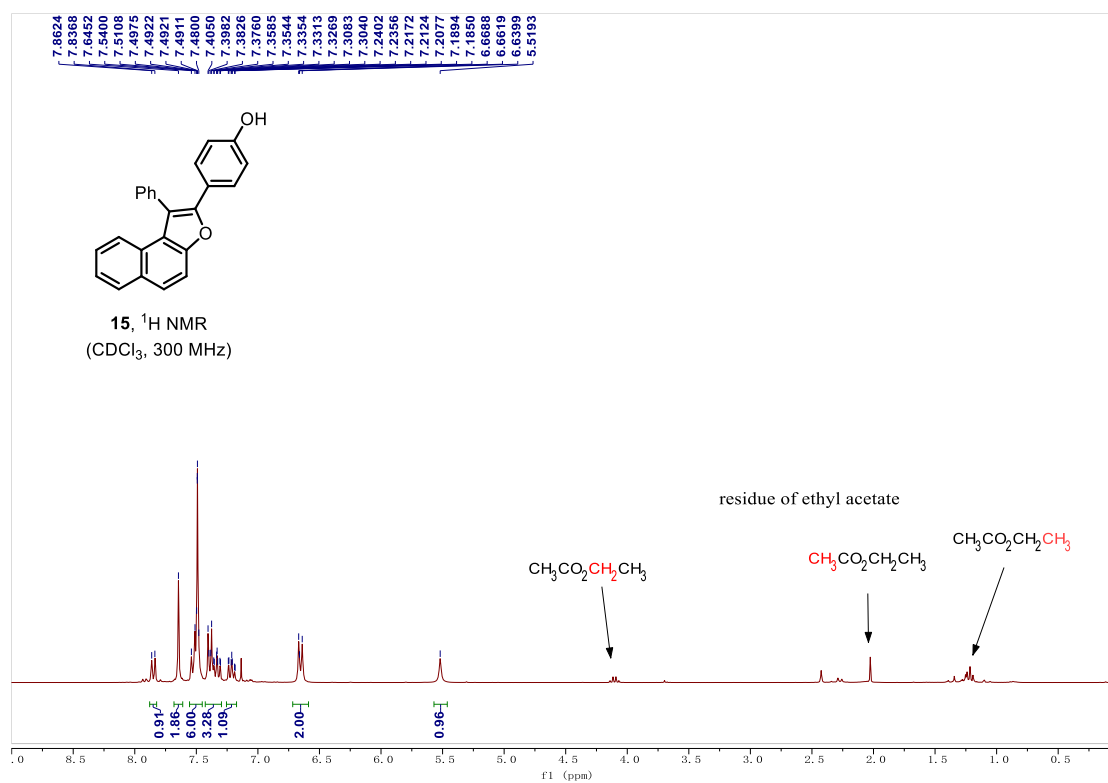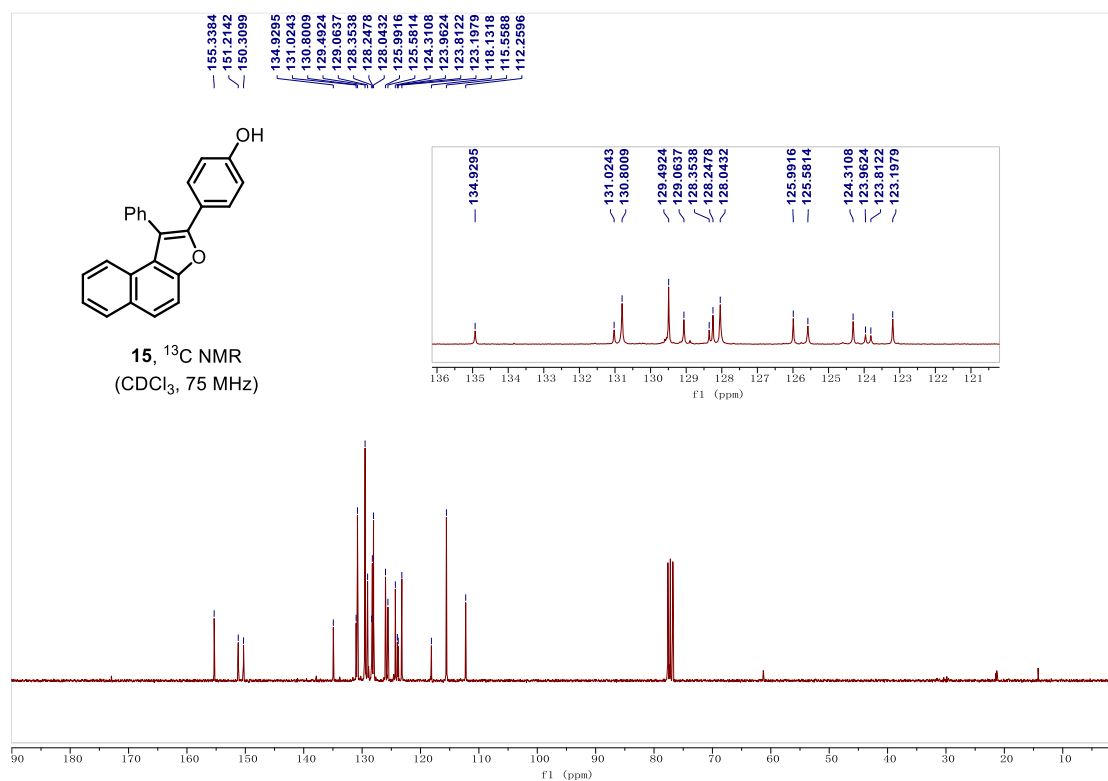

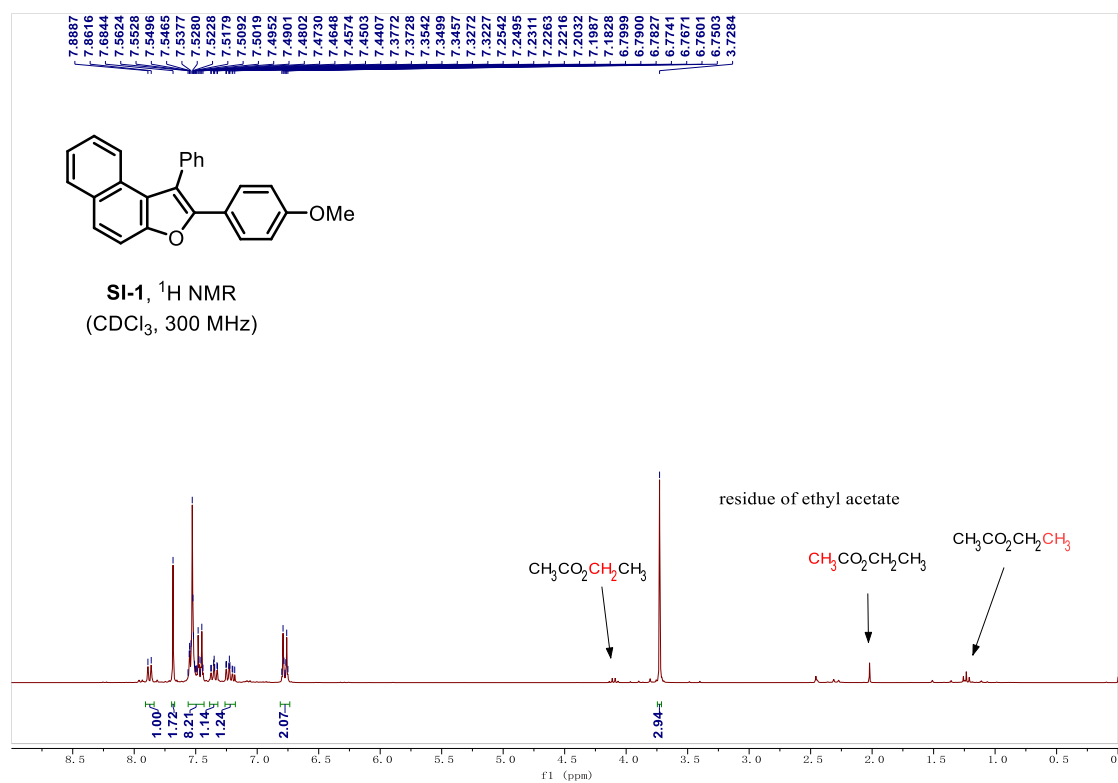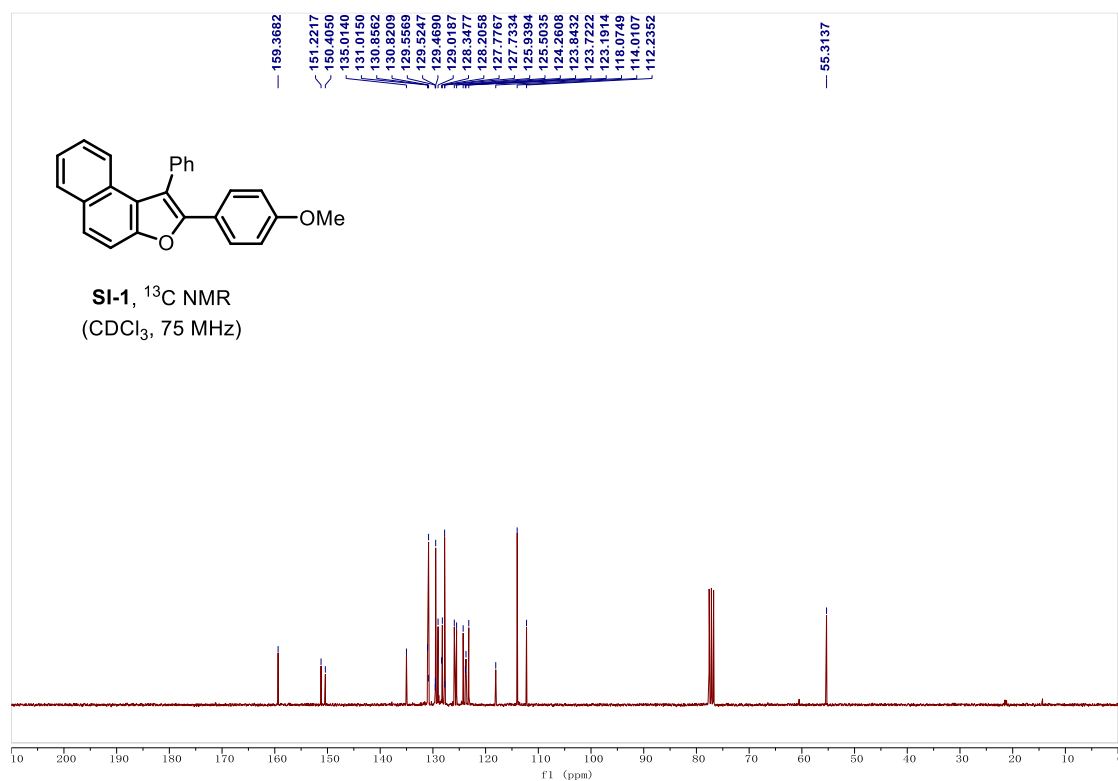



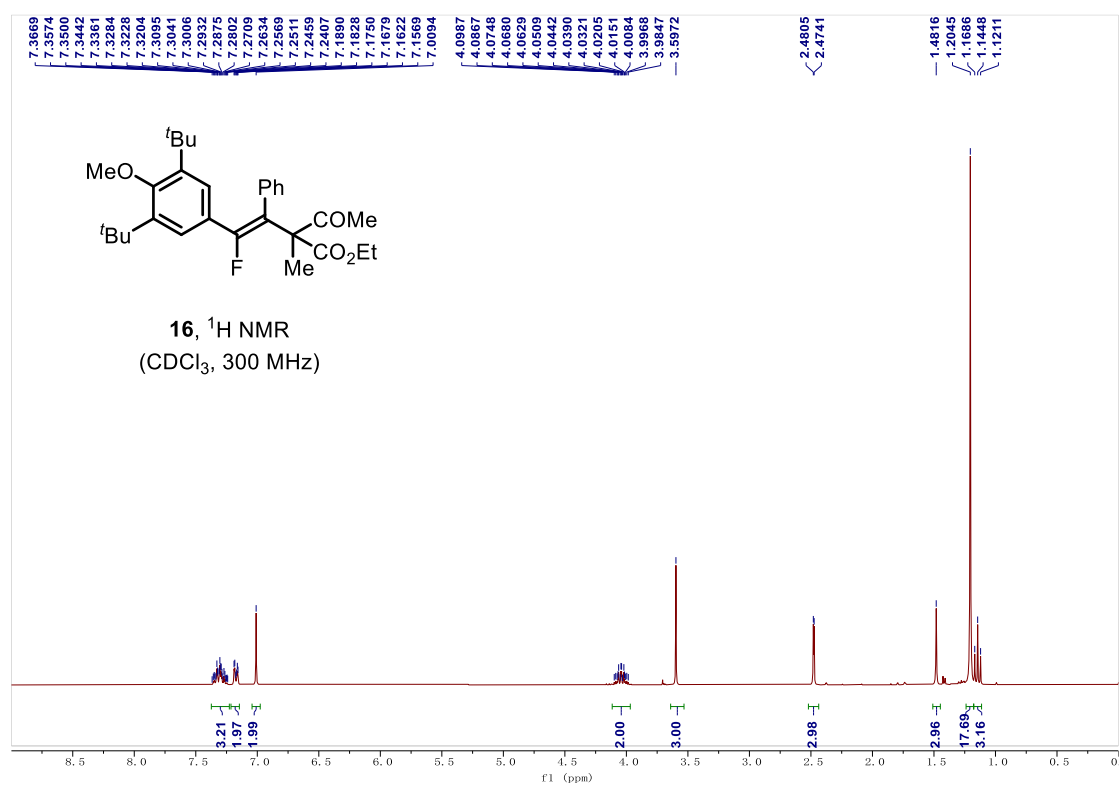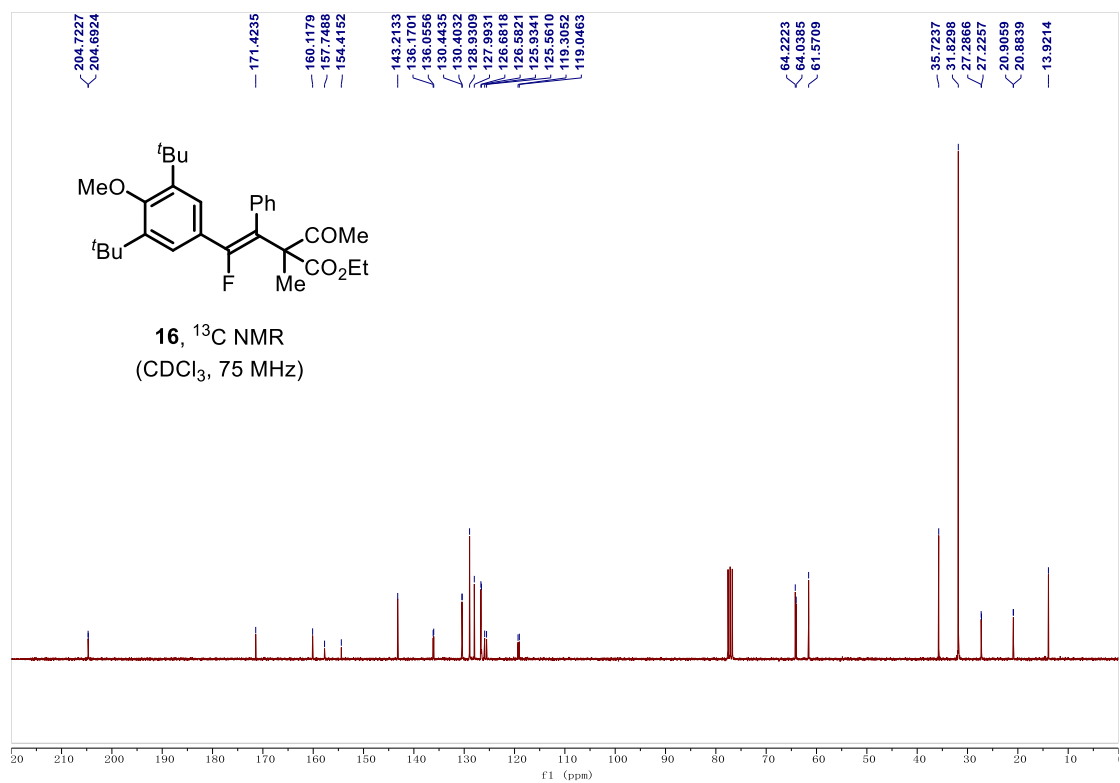

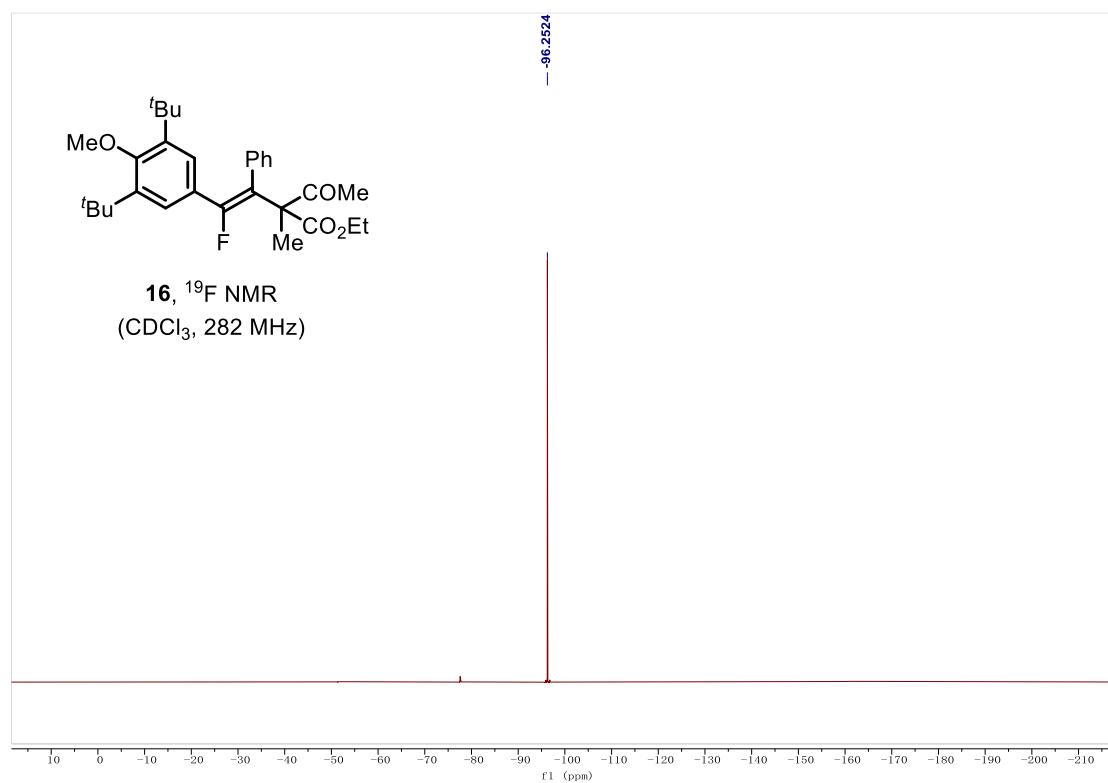

Supplement: d5sc03234b1.pdf [file d5sc03234b1.pdf]
